# Supplementary material for: Endothelial ActRIIA inhibition protects the cardiac microvasculature in severe viral respiratory infection
Source: Research Square preprint supplement (doi:10.21203/rs.3.rs-6306417/v1), 2025-04-01
Supplement: Supplementary file 1 [file 06cd3215a7b16b517905e78d.docx]

**Figure S1:**

**A. B.**

**PBS**

**Flu**


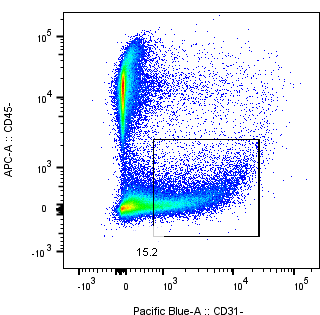

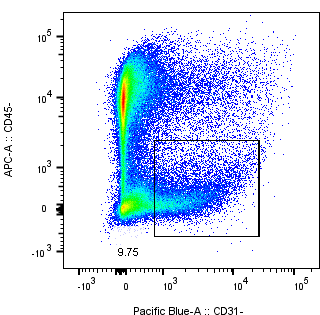


**CD45**

**CD45**

**CD31**

**CD31**

**Figure S1: Endothelial cell numbers decrease in the heart with influenza infection.** Hearts were collected six days after influenza infection vs PBS vehicle injection and subjected to enzymatic digestion and flow cytometry (n=3/group). A) Representative gating strategy used to identify CD31+CD45- endothelial cells. B) Quantification of the percentage of CD31+CD45- cells in the heart. Bar graph displayed as mean ± SEM with individual data points shown. Student’s t-test. P<0.05 considered significant.

**Figure S2:**

**Figure S2: Circulating levels of activin A increase with influenza infection.** Comparison of plasma activin A concentrations three days after influenza infection or PBS injection. N=5-6/group. Bar graph displayed as mean ± SEM with individual data points shown. Student’s t-test. P<0.05 considered significant.

**Figure S3:**


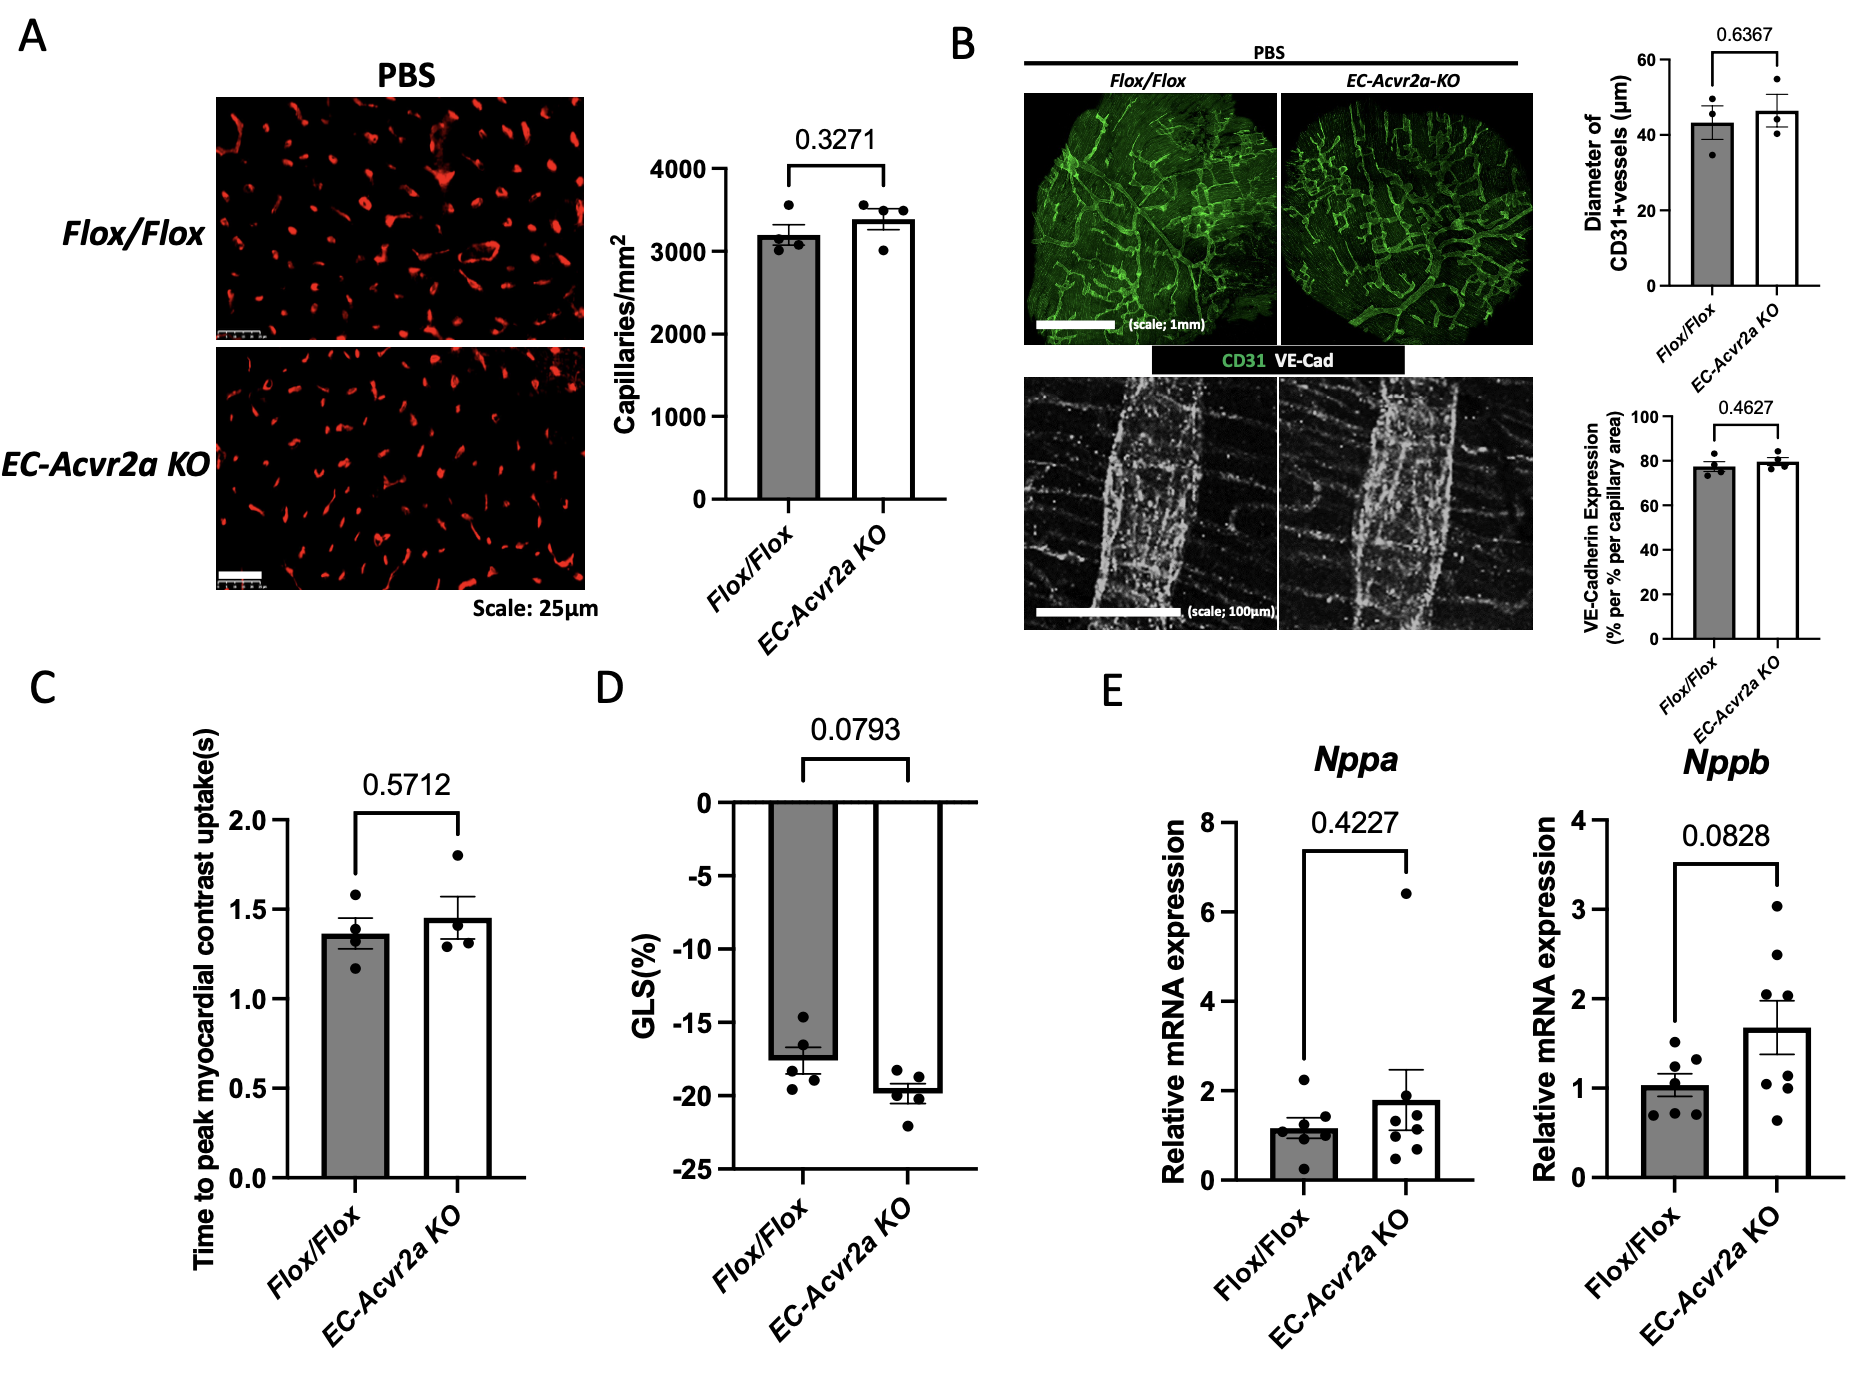


**Figure S3: Baseline cardiac phenotyping of EC Acvr2a-KO mice.** EC-Acvr2a-KO mice were generated by crossing Acvr2a flox/flox with Tie2-Cre mice. (A) Representative images and quantification of myocardial capillary density (CD31= red). N=4/group. (B) Representative images of 3D reconstruction of cardiac microvascular network with tissue clearing and CD31 and VE-cadherin staining. Quantification of vessel diameter and VE-Cadherin expression. N=3-4/group. (C) Myocardial perfusion by contrast echocardiography. N=4/group. (D LV GLS. See Table S1 for complete echocardiography data. N=5/group. (E) Relative cardiac mRNA expression of *Nppa* and *Nppb.* N=6-7/group. All bar graphs displayed as mean ± SEM with individual data points shown. Student’s t-test used. P <0.05 considered significant.

**Figure S4:**


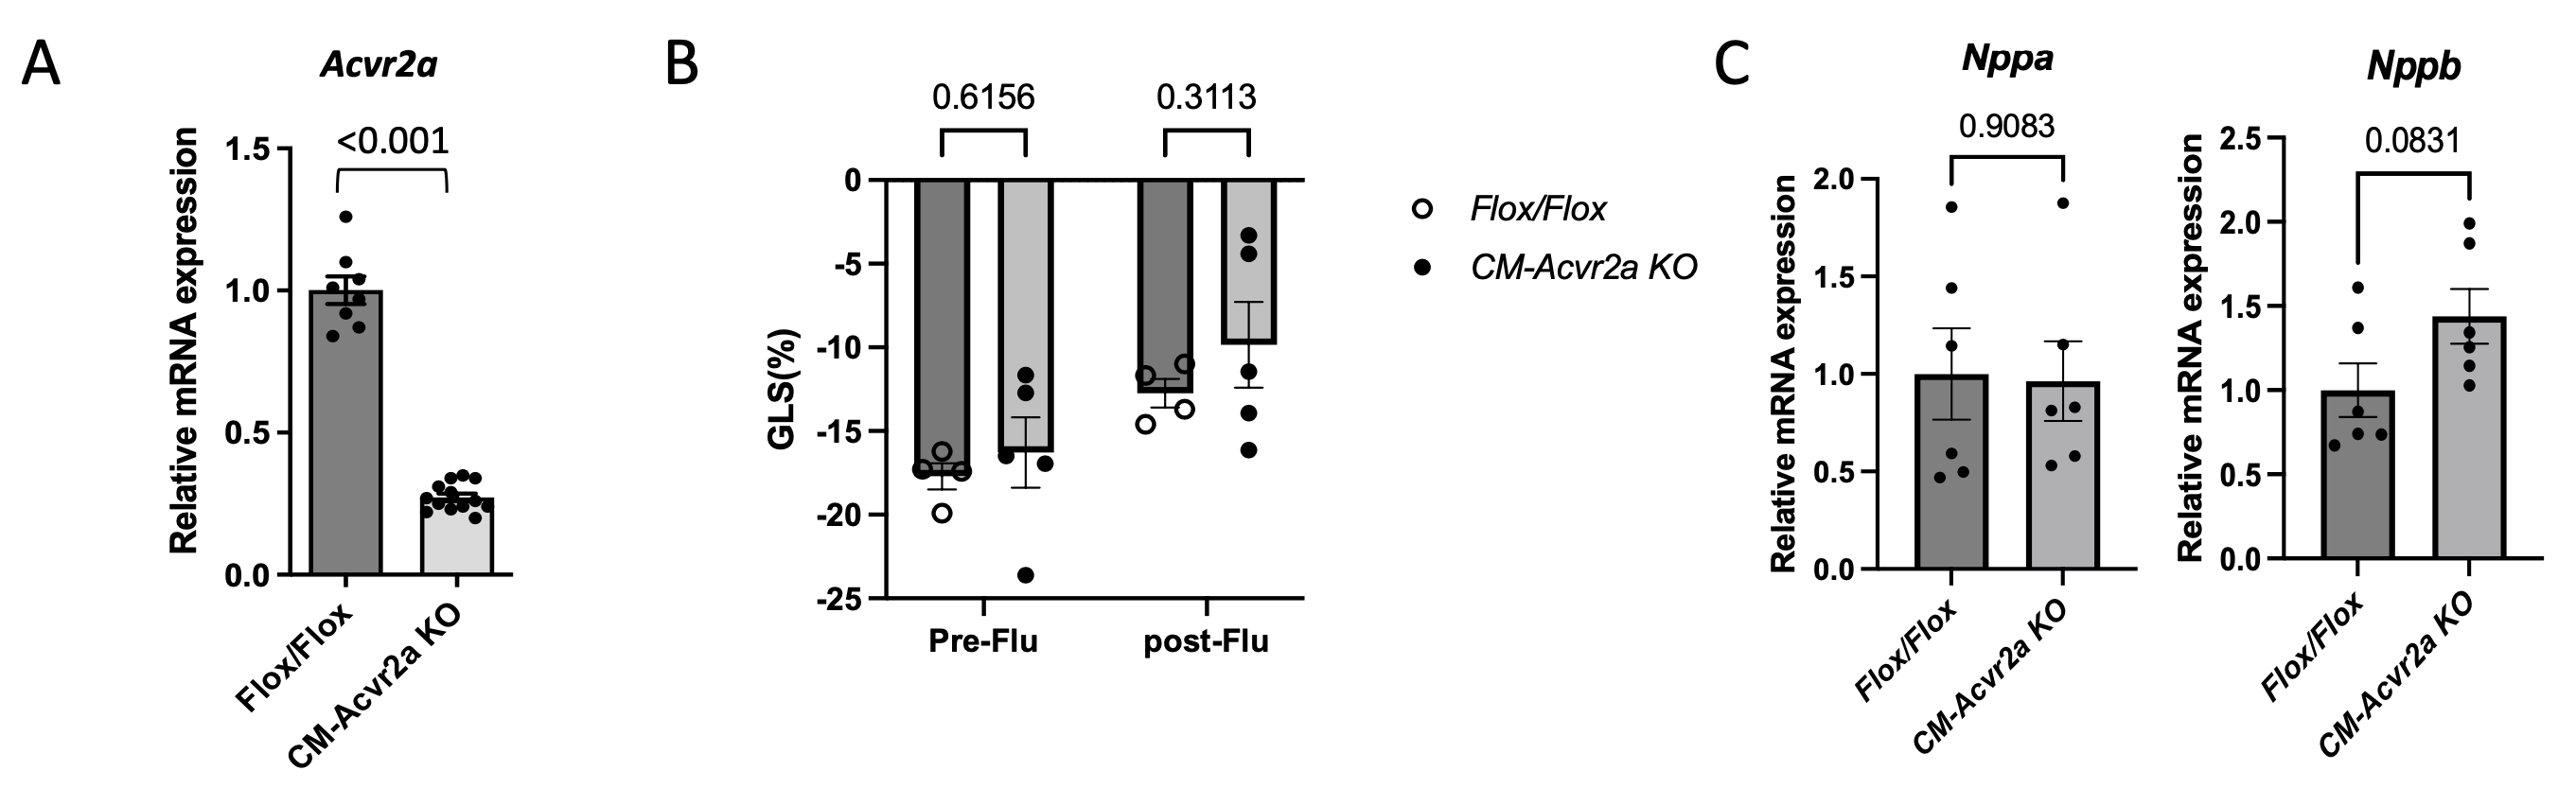


**Figure S4: Cardiomyocyte-specific Acvr2a deletion does not protect from influenza-induced cardiac dysfunction.** (A) Relative *Acvr2a* mRNA expression in LV from non-infected CM-Acvr2A KO vs flox/flox littermate controls. N=8-13/group (includes both males and females). (B) LV GLS before and five days after influenza infection. See Table S1 for complete echocardiography data. N=4-5/group. One-way ANOVA with post-hoc Tukey test. (C) Relative cardiac mRNA expression of *Nppa* and *Nppb.* N=6/group. Student’s t-test. All bar graphs displayed as mean ± SEM with individual data points shown. P <0.05 considered significant.
