# Supplementary material for: Endothelial ActRIIA inhibition protects the cardiac microvasculature in severe viral respiratory infection
Source: Research Square preprint supplement (doi:10.21203/rs.3.rs-6306417/v1), 2025-04-01
Supplement: Supplementary file 2 [file f385f00e3af628e059d1004e.xlsx]

## Sheet: Table S1
Supplemental Table S1: Complete echocardiography datasets from the various mouse studies
Study 1: Echocardiography analysis of Influenza mouse model
	PBS (n= 4)	FLU (n= 4)	p-value
LVEDD (mm)	3.91±0.11	3.15±0.12	0.002445
LVESD (mm)	2.28±0.1	2±0.04	0.0200102
IVSd (mm)	0.85±0.02	0.92±0.1	0.9432
PWd (mm)	0.77±0.07	0.87±0.03	0.206901
LV FS (%)	41.64±1.56	36.18±3.35	0.125603
LVEF (%)	80.03±1.59	73.35±4.17	0.13184
GLS (%)	-22.12±2.07	-13.82±0.76	0.01
HR (bpm)	453.33±12.17	451.25±35.43	0.649796
Study 2: Echocardiography analysis of recombinant activin A mouse model
	PBS (n = 5)	Activin-A (n=5)	p-value
LVEDD (mm)	3.49±0.15	3.25±0.21	0.40626
LVESD (mm)	1.84±0.13	2.34±0.25	0.124549
IVSd (mm)	0.78±0.06	0.96±0.11	0.206089
PWd (mm)	0.71±0.1	0.94±0.09	0.155017
LV FS (%)	47.26±2.89	28.62±3.91	0.00500236
LVEF (%)	84.83±2.08	62.27±6.65	0.0119852
GLS (%)	-18.31±2.6	-10.67±1.19	0.0287785
HR (bpm)	486.8±28.33	465.4±34.89	0.646736
Study 3: Echocardiography analysis of EC Acvr2a-KO mouse
	flox/flox (n=4)	EC Acvr2a-KO (n=4)	p-value
LVEDD (mm)	4.15±0.1	3.92±0.15	0.271437
LVESD (mm)	2.6±0.23	2.42±0.15	0.535074
IVSd (mm)	0.9±0.07	0.96±0.03	0.507606
PWd (mm)	0.78±0.03	0.83±0.04	0.474874
LV FS (%)	36.64±6.71	37.71±5.07	0.902159
LVEF (%)	71.42±6.47	73.94±5.76	0.778561
GLS (%)	-17.6±0.89	-19.85±0.66	0.0792555
HR (bpm)	444.4±14.52	469.6±12.73	0.228421
Study 4: Echocardiography analysis of influenza-infected Acvr2a flox/flox vs EC Acvr2a-KO mice
	flox/flox (n=9)	EC Acvr2a-KO (n=7)	p-value
LVEDD (mm)	3.55±0.18	4.05±0.18	0.253178
LVESD (mm)	2.41±0.19	2.72±0.02	0.492909
IVSd (mm)	0.89±0.04	0.84±0.11	0.629045
PWd (mm)	0.74±0.04	0.83±0	0.381478
LV FS (%)	32.42±3.84	32.6±3.81	0.983916
LVEF (%)	66.75±5.36	69.09±5.2	0.849843
GLS (%)	-13.49±1.6	-20.52±0.73	0.00280932
HR (bpm)	358.77±26.48	362±45	0.95893
Study 5: Echocardiography analysis of infllueza infected Acvr2a flox/flox vs cardiomyocyte-specific Acvr2a-KO mice
	flox/flox, pre-flu (n=4)	CM Acvr2a-KO, pre-flu (n=5)	p-value	flox/flox, post-flu (n=4)	CM Acvr2a-KO, post-flu (n=5)	p-value
LVEDD (mm)	4.02±0.08	4.31±0.09	0.0638985	3.71±0.26	3.97±0.15	0.783611
LVESD (mm)	2.58±0.09	2.94±0.27	0.306726	2.67±0.28	3±0.26	0.765276
IVSd (mm)	0.74±0.04	0.68±0.02	0.309466	0.72±0.02	0.74±0.06	0.529266
PWd (mm)	0.82±0.12	0.74±0.05	0.555188	0.9±0.05	0.89±0.11	0.913173
LV FS (%)	35.62±2.74	32.16±5.32	0.61065	28.55±3.97	24.93±4.51	0.815387
LVEF (%)	72.9±3.14	66.53±6.93	0.469965	62.55±5.57	55.91±7.16	0.713451
GLS (%)	-17.7±0.77	-16.28±2.1	0.586616	-12.73±0.84	-9.84±2.56	0.367179
HR (bpm)	461.75±18.53	386±9.73	0.00628439	379.75±20.78	313.4±25.04	0.183075
Study 6: Echocardiography analysis of influenza-infected mice treated with TBS (vehicle) vs RKER-012
	TBS (n=4)	RKER-012 (n=4)	p-value
LVEDD (mm)	3.24±0.13	2.7±0.22	0.0847475
LVESD (mm)	1.92±0.08	1.42±0.26	0.123701
IVSd (mm)	1.11±0.12	1.17±0.12	0.73686
PWd (mm)	0.73±0.03	1.06±0.1	0.0289261
LV FS (%)	40.51±2.01	47.74±6.64	0.338254
LVEF (%)	78.73±2.11	83.64±5.85	0.460934
GLS (%)	-8.95±1.54	-16.04±2.04	0.032288
HR (bpm)	407.33±32.68	475±29.51	0.187631
Study 7: Echocardiography analysis of influenza-infected mice treated with 7C1-siControl vs 7C1-siAcvr2a nanoparticles
	siControl (n=5)	siAcvr2a (n=5)	p-value
LVEDD (mm)	3.69±0.09	3.44±0.18	0.279056
LVESD (mm)	2.51±0.11	2.28±0.2	0.348479
IVSd (mm)	0.89±0.04	0.92±0.05	0.681071
PWd (mm)	0.71±0.04	0.9±0.07	0.0450288
LV FS (%)	32.12±2.53	34.32±3.48	0.609679
LVEF (%)	67.8±3.19	69.67±5.34	0.765522
GLS (%)	-11.77±1.38	-17.45±1.71	0.0331956
HR (bpm)	420.87±18.14	418.55±23.26	0.938193

## Sheet: Table S2
Supplemental Table S2: Differential gene expression analysis of RNA-seq of left ventricles from influenza-infected versus vehicle (PBS)-exposed mice. Bold = genes meeting DEG threshold of log2FC >0.5 and padj <0.05.
Gene Symbol	Log2(FC)	FDR-adjusted p-value
Fkbp5	4.131	3.7e-160
Spock2	4.811	2.56e-134
Col15a1	-4.999	3.03e-131
Cdkn1a	3.915	2.39e-98
Col3a1	-5.005	1.14e-90
Apod	3.265	2.99e-82
Nrep	-3.935	6.12e-75
C4b	2.961	3.77e-68
Bcl6b	-3.097	4.02e-61
Col6a3	-4.045	6.49e-60
Fmo2	2.59	8.75e-60
Nes	-2.547	1.16e-59
Cnksr1	3.037	4.61e-59
H2-Aa	-3.962	2.07e-58
Mt1	2.356	4.56e-58
Lum	-2.471	4.01e-56
Tfdp2	2.464	5.25e-53
Rorc	2.23	7.26e-53
Doc2b	4.859	9.02e-53
Fam107a	4.207	2.05e-51
Sh3bgr	-2.107	2.77e-50
Ptprf	2.926	1.26e-48
Gnmt	3.187	1.07e-47
Bcl2l1	2.613	6.02e-47
Itga6	-2.161	1.44e-46
Pcdh12	-3.651	4.38e-46
Lcn2	3.479	8.5e-46
Lgals3bp	2.474	2.93e-45
Fgf16	-2.369	9.96e-43
Sult1a1	2.404	2.21e-42
Lox	2.86	6.45e-42
Ogn	-1.991	6.83e-41
Ifit1	3.391	9.26e-41
Tuba1a	-2.048	4.34e-40
Pi16	-2.274	1.47e-39
Baiap2	2.691	5.56e-39
Gimap4	-2.312	1.49e-38
Myh7	3.864	2.03e-37
Papln	-3.02	3.73e-37
Serpinh1	-2.091	1e-36
Kcnv2	-2.678	2.45e-36
Plcd3	2.578	1.1e-35
Serpina3n	2.685	1.27e-35
Col1a1	-3.061	3.83e-35
Cd34	-1.763	9.03e-35
Tfrc	-2.126	1.8e-34
Rps6ka2	-2.045	3.21e-34
Egln3	-1.851	7.26e-34
Map3k6	2.846	7.26e-34
Paxx	2.407	7.75e-34
Ccn2	3.46	9.04e-34
Syn2	2.528	1.41e-33
Col6a2	-2.809	2.16e-33
Ifi203	-1.917	2.3e-33
Mylip	1.881	2.41e-33
Ecm2	-2.075	3.25e-33
Tent5b	4.103	3.71e-33
Fscn1	-2.602	4.68e-33
Krt222	-2.008	4.72e-33
C130080G10Rik	-1.848	4.73e-33
Hif3a	3.705	4.73e-33
Sesn1	1.776	2.52e-32
Sdk2	3.72	2.78e-32
Tcf23	2.675	2.9e-32
Col6a1	-2.454	3.23e-32
Arhgap18	-2.07	3.97e-32
Sh3kbp1	-1.618	1.73e-31
Cdo1	4.458	2.39e-31
H1f2	1.551	2.76e-31
Chid1	-2.145	9.79e-31
Cirbp	1.716	1.27e-30
Postn	-2.767	1.35e-30
P4ha1	-1.796	2.87e-30
Abca8b	-2.093	3.58e-30
Cd74	-3.08	4.46e-30
Pik3r1	2.118	4.91e-30
Irf7	2.154	7.51e-30
Eif4ebp1	1.676	1.06e-29
Cyp1b1	2.263	2.05e-29
Gask1b	-1.877	3.28e-29
Trp53i11	-2.037	6.19e-29
Islr	-2.472	6.48e-29
H2-Ab1	-3.235	1.06e-28
Loxl2	-2.588	1.13e-28
Ky	-2.7	1.34e-28
Tpm4	-1.695	1.37e-28
Trp53inp1	1.922	1.71e-28
Cdhr3	3.758	3.81e-28
Mylk4	-1.793	5.23e-28
Clca3a1	4	5.42e-28
Nnt	2.518	5.68e-28
Gbp6	2.375	7.21e-28
Galnt15	1.599	9.57e-28
Gm16793	-2.665	1.33e-27
Syt12	2.999	1.98e-27
Retreg1	1.991	2.42e-27
Cenpf	-2.292	2.87e-27
Dzip3	-2.766	3.69e-27
Agfg2	1.724	4.43e-27
Ppp1r15a	1.691	9.4e-27
Col1a2	-1.952	1e-26
Xdh	1.696	1.22e-26
Rbm3	1.577	1.54e-26
Glul	1.849	1.93e-26
Pth1r	2.251	5.19e-26
H2-Eb1	-3.314	6.74e-26
Kctd12b	-1.893	7.92e-26
Fstl1	-1.879	8.5e-26
Cmss1	-1.566	9.71e-26
Peg3	1.941	1.21e-25
Hdac9	-1.667	1.89e-25
Hsph1	-1.627	2.69e-25
Meox1	-2.535	2.82e-25
Cd93	-1.465	3.34e-25
Gsta3	1.857	3.45e-25
Plscr2	2.131	3.58e-25
Dcakd	-1.87	4.44e-25
Tspan12	-1.579	4.99e-25
Csdc2	1.628	5.08e-25
Pfkfb3	1.609	9.76e-25
Dbp	-1.846	1.07e-24
Pcsk6	-1.771	1.29e-24
Chgb	4.263	1.29e-24
Lcp1	-2.18	1.33e-24
Ptgs1	1.864	2.15e-24
Lmod3	-1.702	2.92e-24
Apln	-3.287	5.41e-24
Col14a1	-3.047	1.37e-23
Mknk2	1.637	3.02e-23
Ahcy	1.41	3.2e-23
Thbs2	1.552	3.96e-23
Col5a1	-2.033	4.66e-23
Amotl2	1.528	4.73e-23
Plin4	2.125	4.96e-23
Cyp2d22	1.669	5.11e-23
Reep1	-1.77	5.72e-23
Slc3a2	1.505	6.93e-23
Klhdc8a	-1.679	6.95e-23
Pxdn	-1.939	7.08e-23
Itih5	-2.805	7.15e-23
Fam114a1	-1.955	7.86e-23
Fblim1	-1.587	8.05e-23
Tmx2	-1.359	8.08e-23
Myadm	-1.366	9.26e-23
Prodh	2.439	1.11e-22
Smoc2	-1.666	1.19e-22
Sparc	-1.39	1.19e-22
Ly6c1	1.333	1.36e-22
Chka	1.685	1.52e-22
Btnl9	-1.444	1.94e-22
Ak4	-1.673	2.96e-22
Ccnd1	-1.511	3.56e-22
S1pr3	-1.726	3.67e-22
Fgd4	-1.836	4.88e-22
Car4	1.608	6.02e-22
Slc25a28	1.536	6.3e-22
Lama4	-1.728	9.14e-22
Sparcl1	-1.357	9.57e-22
Igfbp3	1.457	1.05e-21
Tmsb4x	-1.447	1.24e-21
St8sia4	-2.125	1.25e-21
Ano10	-1.582	1.53e-21
Igfbp7	-1.418	1.61e-21
Oaf	-2.256	1.76e-21
Adrb1	-1.663	1.76e-21
Ifngr2	-1.359	2.21e-21
Itga9	-1.619	2.35e-21
Tspan2	-1.941	3.67e-21
Fbxo31	1.682	3.92e-21
Ipw	1.961	4.04e-21
Col8a1	-1.839	4.22e-21
Gata2	1.468	5.59e-21
Rasgrp3	-1.408	6.34e-21
Bgn	-1.429	6.88e-21
Bcs1l	-1.553	9.73e-21
Tlcd3b	2.188	1.25e-20
Mgst1	1.604	1.28e-20
Fam131a	-1.64	1.36e-20
Tent5a	2.343	1.52e-20
Itga1	-1.385	1.8e-20
Rtn4ip1	-1.357	1.85e-20
Ints7	-1.649	2.07e-20
Rcn1	-1.533	2.29e-20
Tmsb10	-1.737	3.27e-20
Actb	-1.327	3.29e-20
Rab27a	2.058	4.47e-20
Fam124a	1.568	4.59e-20
Ddr2	-1.534	5.03e-20
Matn2	-1.836	5.18e-20
Ston2	-2.285	5.31e-20
Dpt	-1.457	6.66e-20
Apol10b	-2.683	7.17e-20
Adh1	1.538	7.98e-20
Inmt	2.159	1.03e-19
Fam81a	-2.168	1.08e-19
Ddo	-1.45	1.08e-19
Etfbkmt	1.657	1.08e-19
Emilin1	-1.755	1.19e-19
Gm12295	1.645	1.19e-19
Dcun1d2	-1.271	1.36e-19
Inka2	-1.828	1.43e-19
Vwa1	-1.776	1.49e-19
Ets1	-1.411	1.56e-19
Bnip3	2.014	2.23e-19
Sema3c	-1.837	2.53e-19
Plaat1	-1.371	2.7e-19
Fah	2.245	3.13e-19
Slc10a6	2.539	3.56e-19
Unc5b	-1.664	3.88e-19
Polq	-1.743	4.91e-19
Gal3st2c	-2.297	6.22e-19
Mndal	-1.498	7.07e-19
Wnk1	-1.41	8.26e-19
Pim3	1.526	8.73e-19
Pea15a	-1.348	8.78e-19
Adamts15	1.731	8.83e-19
Actg1	-1.411	8.92e-19
Rcn3	-1.818	1.03e-18
Vcan	-2.121	1.3e-18
Thap2	-1.969	1.33e-18
Lrrc3b	-1.677	1.51e-18
Fam110d	1.899	1.51e-18
Zfp46	1.301	1.64e-18
Eef2k	1.447	1.64e-18
Heyl	-1.45	1.85e-18
Col5a2	-1.499	2.04e-18
Atg101	1.4	2.21e-18
Aldh1l1	1.832	2.77e-18
Alpl	-1.557	3.32e-18
Drap1	1.692	3.36e-18
Scx	2.449	3.4e-18
Snhg11	3.509	3.47e-18
Fstl4	2.214	4.23e-18
Mtfp1	-1.249	4.93e-18
Akr1c14	-2.216	5.15e-18
Bche	-1.545	5.19e-18
Dapp1	-1.771	5.28e-18
Aldob	2.123	5.47e-18
Ubc	1.21	5.69e-18
S100a11	-1.735	7.11e-18
Tmtc2	-2.31	7.4e-18
Ninj1	1.507	7.43e-18
Alb	10.388	7.7e-18
Tmem65	-1.241	1e-17
Clu	1.695	1.01e-17
Vim	-1.39	1.09e-17
Trim63	1.368	1.09e-17
Bcl6	-1.517	1.45e-17
Prelp	-1.768	2.25e-17
Efhd2	1.509	2.25e-17
Kdr	-1.256	2.79e-17
Snta1	1.676	2.94e-17
Mgl2	-2.898	3.13e-17
B3galnt2	-1.442	3.29e-17
Tnfrsf12a	1.908	3.3e-17
Acta2	-2.051	4.01e-17
Gal3st3	-1.839	4.73e-17
Adamts9	-1.607	4.87e-17
Csrnp1	1.615	5.37e-17
Pde7b	-1.944	6.12e-17
Rassf3	-1.118	6.47e-17
Ift122	-1.796	6.51e-17
Myh14	1.401	7.3e-17
Twsg1	-1.223	7.47e-17
Akap12	-1.532	8.5e-17
Herpud1	1.527	8.51e-17
Ptgds	3.24	8.77e-17
Ppp1r13l	1.421	8.83e-17
Pmm1	1.557	1.23e-16
Hsd11b1	1.702	1.3e-16
Ankrd9	1.692	1.41e-16
Chordc1	-1.331	1.44e-16
Pla2g12a	1.502	1.45e-16
Arap1	-1.437	1.48e-16
Ccnd2	-1.339	1.51e-16
Ppp1r12c	1.235	1.54e-16
Mgat5	-1.522	1.58e-16
Myrip	1.56	1.58e-16
Cd55	-2.077	1.62e-16
Pkd2l2	-1.482	1.87e-16
Tmtc1	1.184	2.27e-16
D630003M21Rik	-2.038	2.55e-16
Car14	1.199	2.56e-16
Ret	-2.167	2.74e-16
Galm	-1.503	2.86e-16
Osmr	1.31	3.5e-16
Art3	1.286	3.74e-16
Or8b53	2.727	3.74e-16
Mrc2	-1.538	4.47e-16
Whamm	1.278	4.64e-16
Tom1	1.348	5.7e-16
Hjv	-1.242	5.91e-16
Ttc14	-1.315	6.06e-16
Apobec3	1.539	6.06e-16
Ifi27	1.288	6.31e-16
Rpia	-1.587	6.99e-16
Eva1c	2.938	7.72e-16
Oxnad1	-1.147	9.68e-16
Limd1	1.104	9.84e-16
Tmtc4	-2.144	1.03e-15
Ddx24	1.118	1.05e-15
Adgrf5	1.386	1.14e-15
Mfap3l	-1.636	1.15e-15
Gm35533	2.618	1.17e-15
Lmbr1l	1.298	1.18e-15
Cux2	-1.83	1.33e-15
Nrp1	-1.238	1.33e-15
Selenon	-1.422	1.48e-15
9530026P05Rik	1.632	1.52e-15
Jade2	1.406	1.6e-15
Mafk	1.22	1.62e-15
Lonrf3	3.3	1.62e-15
Fv1	-1.741	1.98e-15
Pde4a	-1.557	2.1e-15
Arrdc2	3.095	2.32e-15
Akr1e1	-1.391	2.42e-15
Sik3	1.18	2.45e-15
Myom2	1.67	2.5e-15
Emp1	-1.65	2.69e-15
Pigg	-1.339	3.04e-15
Timp4	1.56	3.09e-15
Adam17	-1.207	3.13e-15
Spta1	-1.273	3.17e-15
Ccdc69	-2.02	3.24e-15
Perp	1.18	3.42e-15
Heatr5b	-1.295	3.6e-15
Gm14966	2.802	3.94e-15
Cnnm3	1.433	4.49e-15
Plxnd1	-1.38	5.26e-15
Nacc2	-1.199	5.26e-15
Reep5	-1.1	5.33e-15
Fndc1	-2.545	5.45e-15
Tagln2	-1.136	5.45e-15
Ddx60	2.045	5.6e-15
Aldh18a1	-1.836	5.96e-15
Ifit3	1.621	6.01e-15
Adcy7	-1.663	6.37e-15
Ctsl	1.546	6.37e-15
Jam2	-1.11	6.73e-15
Pdia4	-1.395	6.82e-15
Mkks	-1.534	6.84e-15
Lgmn	-1.145	7.53e-15
Max	1.186	7.66e-15
Igsf1	-1.969	7.72e-15
Lsmem1	-1.645	7.72e-15
Rnf144b	1.633	8.5e-15
Ahsg	3.198	8.87e-15
Ncbp2	-1.234	1.21e-14
Gxylt2	-2.084	1.22e-14
Zfp950	-1.333	1.25e-14
Psd3	-1.408	1.3e-14
Klf15	1.528	1.3e-14
Colgalt2	-1.811	1.33e-14
Klhl23	-1.221	1.47e-14
Rassf4	1.514	1.63e-14
Hacd1	-1.382	1.68e-14
Pole4	-1.274	1.7e-14
Dusp3	-1.066	1.7e-14
C330018D20Rik	-1.506	1.97e-14
Gpm6b	-1.559	1.98e-14
Myo1b	-1.152	2.08e-14
Yae1d1	-1.259	2.19e-14
Mmd	-1.628	2.48e-14
Pbld1	2.372	2.48e-14
Ankrd1	1.58	2.58e-14
Rin3	1.325	2.62e-14
Mir22hg	2.02	2.62e-14
Fabp5	-1.307	2.72e-14
Ctsc	-1.349	3.52e-14
Hspa12a	-1.529	3.57e-14
Ltbp1	-1.144	3.72e-14
Rnf39	2.776	3.82e-14
Vcam1	-1.399	4.24e-14
Atoh8	1.428	4.29e-14
Tcim	-1.602	4.3e-14
Nos2	-1.861	4.7e-14
Il4ra	1.591	4.72e-14
Rflnb	-1.152	5.1e-14
Hr	-1.307	5.5e-14
Tnfaip2	-1.203	5.95e-14
Sesn3	-1.157	6.43e-14
Stxbp4	-2.179	6.45e-14
Errfi1	1.481	6.51e-14
Loxl1	-1.43	6.65e-14
Ehd2	-1.096	6.9e-14
Gng11	-1.224	7.11e-14
2410006H16Rik	1.78	7.29e-14
Nrp2	-1.579	7.39e-14
Trmt1l	-1.332	7.54e-14
Arhgap29	-1.084	8.23e-14
Srek1ip1	-1.229	8.25e-14
Peg10	2.519	8.79e-14
Tspyl2	1.301	1.05e-13
Meox2	-1.326	1.07e-13
Serpinf1	-1.501	1.1e-13
Abca8a	-1.373	1.13e-13
Nek1	-1.402	1.19e-13
Mapk4	1.748	1.19e-13
AI837181	1.332	1.26e-13
Fam78b	-2.293	1.32e-13
Itpripl1	1.358	1.42e-13
Fam117b	1.324	1.51e-13
Krt80	2.668	1.69e-13
Trim54	1.28	1.86e-13
Clasp1	-1.168	1.9e-13
Sqstm1	1.221	1.91e-13
Ptpn11	1.234	2.36e-13
Egr1	-2.144	2.48e-13
Zxdc	1.076	2.56e-13
Dnajc27	-1.331	2.65e-13
Gas1	-1.426	2.67e-13
Pnpla2	1.318	2.77e-13
Tmem38b	1.093	2.85e-13
Ogfr	1.097	2.86e-13
Lrg1	1.508	3.14e-13
Enkur	2.617	3.23e-13
Armh4	-1.343	3.39e-13
Cpox	-1.195	3.44e-13
Pf4	-1.909	3.51e-13
Armcx2	-1.867	3.54e-13
Sphk1	2.035	3.56e-13
Xirp1	1.159	3.75e-13
Itpkb	-1.329	3.99e-13
Atg13	1.106	4e-13
Tpst1	-1.584	4.18e-13
Ubb-ps	1.146	4.66e-13
Igdcc4	-1.728	4.75e-13
Pcolce	-1.279	4.91e-13
Tm4sf1	-1.051	5.18e-13
Prcp	-1.403	5.29e-13
Ppfia1	1.566	5.29e-13
Tnni2	2.804	5.29e-13
Mrpl3	-0.994	5.83e-13
Ldb1	1.079	5.87e-13
Nid1	-1.13	5.9e-13
Ggcx	-1.421	6e-13
Epop	2.128	6.18e-13
Miip	1.352	6.28e-13
Hmox1	1.443	6.4e-13
Usp18	1.858	6.69e-13
Ces1d	-1.199	6.73e-13
Serinc3	1.164	6.81e-13
Maff	1.341	7.03e-13
Ltbp4	-1.267	7.26e-13
Gm11827	3.048	7.38e-13
Ddrgk1	1.14	7.58e-13
Angptl2	-1.287	7.94e-13
Nipa1	-1.631	8.04e-13
Tmco3	-1.092	8.4e-13
Gbp2	-1.593	9.32e-13
Cxcl16	-1.991	9.73e-13
Gja1	-1.283	9.82e-13
Ifit3b	2.12	1.21e-12
Decr2	-1.468	1.25e-12
Plin3	1.092	1.25e-12
Crtap	-1.26	1.31e-12
Fbln1	-1.084	1.31e-12
Anpep	-1.629	1.32e-12
Ptprn	1.531	1.35e-12
Poglut3	-1.386	1.4e-12
Pola1	-1.676	1.42e-12
Dusp6	-1.571	1.47e-12
Fkbp4	-1.149	1.49e-12
Dab2	-1.342	1.55e-12
Fn1	-1.378	1.56e-12
Mtr	-1.21	1.84e-12
E230013L22Rik	1.395	1.87e-12
Twf2	0.98	1.88e-12
Col5a3	-1.279	1.89e-12
Amy1	1.115	1.91e-12
Plekho2	-1.337	1.95e-12
Lgr6	-1.212	1.97e-12
Gstm1	1.086	2.17e-12
Tinagl1	1.18	2.21e-12
Parvg	2.453	2.31e-12
Kalrn	1.129	2.33e-12
Sspn	-1.053	2.35e-12
Mmachc	-1.03	2.43e-12
Clba1	2.17	2.48e-12
Prmt2	-1.61	2.6e-12
Tmc7	-1.752	2.68e-12
Zfas1	1.263	2.73e-12
Ptprc	-2.056	2.84e-12
Lrrk2	-1.122	2.9e-12
Gimap6	-1.103	3.07e-12
Marcks	-1.353	3.17e-12
Fbxl22	-1.656	3.26e-12
Siah1a	1.122	3.26e-12
Ttc7	-1.231	3.33e-12
Gpd1	1.286	3.33e-12
Trpv4	1.453	3.33e-12
Abca9	-1.427	3.45e-12
Afg1l	-1.07	3.48e-12
Zbtb16	2.332	3.76e-12
Srsf5	1.047	4.05e-12
4833418N02Rik	1.738	4.06e-12
Mmaa	-1	4.09e-12
Zc3h6	1.263	4.18e-12
Enpep	-1.886	4.61e-12
Ell	1.183	4.69e-12
Arih2	0.969	4.81e-12
Tmem179	1.458	4.84e-12
Cyb5d2	-1.205	4.88e-12
Rbm28	-1.12	4.92e-12
Kdelr3	-1.949	5.37e-12
Sema6b	1.701	5.69e-12
Fbn1	-1.684	5.8e-12
Xk	-1.578	5.81e-12
Cxcl12	-1.214	5.81e-12
Dhrs7	-1.054	5.9e-12
Mettl16	-1.198	5.93e-12
Taco1	-1.058	6.12e-12
Adgrg1	1.2	6.37e-12
Ybx3	1.085	6.72e-12
Armcx3	-1.373	7.12e-12
Ttll12	-1.597	7.28e-12
Crtc2	1.083	7.28e-12
Pbxip1	0.954	7.3e-12
Rgs4	-1.147	7.31e-12
Hmgcs2	2.381	7.4e-12
Gabarapl1	0.974	7.61e-12
Wnt5a	-1.908	7.64e-12
Arhgef37	2.086	8.32e-12
Klhl2	1.025	8.88e-12
Tubd1	-1.755	8.94e-12
Scn4b	-1.945	9.03e-12
Fam111a	-1.712	9.14e-12
Inpp5k	1.006	9.4e-12
Dnajc7	0.948	9.45e-12
Psmd4	1.152	1.01e-11
Tmbim1	1.177	1.02e-11
Sco1	-1.108	1.07e-11
Dchs1	-1.533	1.08e-11
Itpripl2	-1.038	1.11e-11
Col6a6	-1.748	1.16e-11
Sugp1	0.98	1.16e-11
Kcnc1	2.569	1.2e-11
Uros	-1.03	1.21e-11
Fnip2	1.237	1.21e-11
Chtf8	-1.069	1.23e-11
Flt1	1.048	1.23e-11
Tnrc6a	0.975	1.26e-11
Slc36a2	-1.23	1.28e-11
Nr3c1	-0.983	1.32e-11
Vps11	1.144	1.38e-11
Afdn	-0.964	1.39e-11
Ighm	-2.328	1.41e-11
Adamtsl2	-1.793	1.46e-11
Tet1	-1.896	1.47e-11
Caprin1	-0.92	1.6e-11
Adarb1	1.144	1.6e-11
Mthfr	1.077	1.67e-11
Jam3	-1.417	1.81e-11
Manba	-1.044	1.81e-11
Nub1	0.969	1.89e-11
Selenbp1	0.979	1.95e-11
Anxa2	-1.035	1.97e-11
Aasdh	-1.342	2.02e-11
Irf9	1.192	2.02e-11
Itm2a	-1.557	2.11e-11
Mocs1	1.432	2.13e-11
Josd2	-1.215	2.33e-11
Lrrc58	1.088	2.33e-11
Mcm2	-1.543	2.37e-11
Ibtk	-0.975	2.37e-11
Xpo1	-1.152	2.42e-11
Aqp7	-1.282	2.48e-11
Alg9	-1.438	2.51e-11
Rmnd1	-1.053	2.65e-11
Steap3	-1.067	2.87e-11
Ankrd33b	1.022	2.91e-11
Zfp110	0.965	2.98e-11
Ccdc141	-0.952	3.09e-11
Spsb1	1.262	3.15e-11
Slc25a26	-1.036	3.19e-11
Pde4b	-1.137	3.47e-11
Pltp	-1.255	3.64e-11
Myh9	-1.165	3.7e-11
Hic1	-1.354	3.76e-11
Ankrd23	1.351	4.11e-11
Akap8l	1.076	4.12e-11
Itih4	2.343	4.52e-11
Nudt12	-1.073	4.56e-11
Cacnb2	-1.007	4.73e-11
AW112010	-1.505	4.79e-11
Rcbtb2	-1.094	4.9e-11
Zfp931	-2.017	5.24e-11
Ints2	-1.644	5.25e-11
Klf9	0.964	5.3e-11
Lclat1	-0.899	5.55e-11
Pcdh18	-1.726	5.82e-11
Acaca	1.353	5.86e-11
Hspa13	-1.216	6.07e-11
Rnf166	0.996	6.07e-11
Gpihbp1	1.066	6.07e-11
Sec14l5	-2.09	6.51e-11
Heatr5a	-1.104	6.76e-11
Trpc3	-1.252	7.15e-11
Mme	-1.161	7.18e-11
Grk3	1.184	7.35e-11
Slco5a1	-1.297	7.59e-11
Coq10b	-1.22	7.6e-11
Midn	1.209	7.78e-11
Dipk2a	-1.103	7.83e-11
Pi4k2a	0.961	8.1e-11
Phyhd1	1.496	8.33e-11
Gimap8	-1.506	8.43e-11
Hmcn2	-1.255	8.85e-11
Col4a1	-0.991	8.92e-11
Timm21	-0.959	9.06e-11
Trafd1	0.919	9.48e-11
Ctdsp2	0.91	9.59e-11
Cc2d2a	-1.342	9.72e-11
Smco4	-1.334	9.72e-11
Arl4d	1.137	9.88e-11
Slc22a3	-1.504	9.92e-11
Pkia	-1.048	9.92e-11
Efr3b	-1.319	1.05e-10
Cars2	-1.192	1.09e-10
Synm	-1.396	1.13e-10
Spryd7	-0.962	1.18e-10
Ssc5d	-1.996	1.19e-10
Foxo3	1.06	1.2e-10
Bmal1	1.58	1.22e-10
Ppp1r14c	-0.943	1.26e-10
Efcab2	-0.913	1.33e-10
Siae	-1.266	1.35e-10
Mall	-1.872	1.46e-10
Ppm1f	-1.062	1.48e-10
Aldh1l2	-1.612	1.53e-10
2310039L15Rik	-1.916	1.55e-10
Arhgap27	1.188	1.62e-10
Zkscan17	1.029	1.67e-10
Nkain1	-1.989	1.7e-10
Dync1li1	0.888	1.77e-10
Pls3	-0.924	1.85e-10
Vash1	-1.393	1.86e-10
Asap3	-1.461	1.92e-10
Nqo1	1.124	1.95e-10
Synpo2l	1.054	2.05e-10
Coro1a	-1.612	2.14e-10
Hrct1	1.432	2.22e-10
Ogdhl	1.028	2.3e-10
Cdc42ep2	-1.359	2.33e-10
Adcy1	-2.312	2.37e-10
Sbds	0.877	2.51e-10
Sox17	1.037	2.61e-10
Ikbip	-1.114	2.62e-10
Hecw2	0.984	2.62e-10
Eln	1.26	2.73e-10
Cebpd	1.741	3.03e-10
Abcg2	0.93	3.14e-10
Zmat1	-1.573	3.2e-10
Aldh1a2	-2.119	3.29e-10
Mmp3	1.564	3.39e-10
Osbpl6	-1.135	3.55e-10
Dysf	-1.028	3.56e-10
Tns1	1.452	3.6e-10
Mx2	1.732	3.72e-10
Hhipl1	1.584	3.81e-10
Kif5c	-1.26	3.87e-10
Lyrm7	-1.162	3.87e-10
Slc37a2	-1.715	3.96e-10
Sart1	0.912	4.06e-10
Tspan6	-2.05	4.58e-10
Bin1	-1.418	4.66e-10
Mfsd2b	1.773	4.72e-10
Magt1	-0.964	4.85e-10
Neat1	1.502	5.18e-10
Uqcc5	1.406	5.23e-10
Rnf144a	-1.189	5.34e-10
Pafah2	-1.417	5.43e-10
Htra1	-0.889	5.79e-10
Ggta1	-1.033	7.09e-10
Abra	1.325	7.14e-10
Pfkl	-0.886	7.74e-10
Epdr1	-1.011	8.04e-10
Gm15417	1.193	8.54e-10
Gp1ba	1.5	8.54e-10
Tm9sf3	-0.889	8.82e-10
Chac2	-1.106	8.85e-10
Gja5	-1.763	9.15e-10
Lyrm9	-1.086	9.15e-10
Taf1d	0.954	9.33e-10
Gm6018	1.992	9.86e-10
Cxadr	-1.123	1e-09
Coro6	1.302	1e-09
Dhtkd1	1.048	1.03e-09
Map1lc3b	0.891	1.04e-09
Dut	-1.014	1.06e-09
Mrpl34	-0.936	1.07e-09
Ifrd1	0.969	1.11e-09
Dok4	-1.313	1.17e-09
Dsc2	-0.935	1.23e-09
Gpr22	-1.247	1.26e-09
Hccs	-0.943	1.26e-09
Zfp72	-1.673	1.27e-09
Teddm2	1.837	1.29e-09
Mob1a	-0.902	1.3e-09
Ehd4	1.061	1.32e-09
Gm10635	-1.44	1.33e-09
Gfpt1	-0.964	1.4e-09
Ptgr2	-0.846	1.42e-09
Bmp4	1.325	1.44e-09
Gpr153	-1.278	1.46e-09
Ggnbp2	0.858	1.48e-09
Sh3tc2	-1.641	1.49e-09
Rhobtb3	-1.11	1.55e-09
Rnf152	-1.64	1.58e-09
Arhgef15	-0.892	1.63e-09
Rlf	0.975	1.69e-09
Cbx7	0.955	1.72e-09
Brms1l	-1.101	1.75e-09
Hacd4	-1.6	1.77e-09
Tspan4	0.975	1.85e-09
Kpna2	-1.164	1.87e-09
Gid4	-0.892	1.95e-09
Ralgapa1	-0.886	1.98e-09
C230035I16Rik	1.576	2.03e-09
Cyp26b1	1.946	2.14e-09
Zfp932	-1.725	2.16e-09
Xirp2	-1.045	2.21e-09
Cfap43	1.389	2.43e-09
Tspan13	-1.02	2.44e-09
Slc9a2	-1.579	2.52e-09
Psmc1	0.885	2.54e-09
Exd2	-1.055	2.67e-09
Tufm	-0.811	2.67e-09
Aspa	-2.096	2.69e-09
Pmp22	-0.897	2.74e-09
Gpr160	1.546	2.79e-09
Slc28a2	-1.231	2.82e-09
Tubb4b	-0.955	2.86e-09
Acta1	-1.493	2.89e-09
Epha4	-1.015	2.9e-09
Ywhaq	-0.918	2.94e-09
Csnk1e	0.979	2.95e-09
Tmem204	-1.019	3.32e-09
Grb14	-0.816	3.38e-09
Mxra7	-1.449	3.41e-09
Uprt	-2.032	3.47e-09
Fas	1.053	3.58e-09
Btg3	1.16	3.64e-09
B230354K17Rik	-1.401	3.67e-09
Igfbp5	-1.226	3.67e-09
Gnpda2	-1.193	3.75e-09
Ngf	-1.823	3.83e-09
Add3	-0.912	3.83e-09
Plxnb3	-1.985	4.2e-09
Eda2r	-1.972	4.24e-09
Uqcc1	-0.907	4.24e-09
Amot	0.935	4.27e-09
Nudt16	1.377	4.31e-09
Fam120a	-0.841	4.48e-09
Gpr137c	1.088	4.58e-09
Snhg5	1.317	4.6e-09
Rpa3	-1.252	4.61e-09
Brip1os	-1.177	4.65e-09
Lingo3	-1.227	4.73e-09
Mdga1	-2.073	4.78e-09
Spry4	-1.148	4.79e-09
Dmwd	0.977	4.86e-09
Mtrfr	-1.281	4.89e-09
Zfp777	1.143	5.05e-09
Adora2a	-1.432	5.13e-09
Dpep1	0.906	5.15e-09
Tsc22d1	-0.897	5.19e-09
Slc16a7	-1.599	5.3e-09
Map7	0.933	5.32e-09
Ipo7	-0.818	5.68e-09
Arl5a	-0.86	6.01e-09
S100a10	-0.947	6.02e-09
Hsf4	1.597	6.02e-09
Cenpc1	-1.266	6.13e-09
Bmp6	1.003	6.14e-09
Zfp60	-1.184	6.19e-09
Fry	0.984	6.39e-09
Prrg3	-1.243	6.52e-09
Ddit4	2.306	6.55e-09
Col16a1	-1.625	6.56e-09
Las1l	0.834	6.56e-09
Ramp2	0.855	6.72e-09
C1s1	-0.94	6.99e-09
Cep128	-1.217	7.03e-09
Per1	1.689	7.03e-09
Stat2	1.342	7.31e-09
Adam22	0.953	7.5e-09
Galnt11	-0.978	7.56e-09
Epb41l4a	-1.379	7.61e-09
Aspscr1	0.993	7.89e-09
Tsga10	-1.52	8.12e-09
Spice1	-1.428	8.15e-09
Mtif2	-0.871	8.43e-09
Rgs7bp	-1.534	8.54e-09
Myct1	-1.376	8.73e-09
Hspd1	-0.999	8.91e-09
Kcnj3	-0.829	9.03e-09
Gnb4	-1.108	9.06e-09
Rnf150	-0.998	9.07e-09
Lrrc8a	0.956	9.22e-09
Nudt4	-0.993	9.24e-09
Cygb	-0.936	9.41e-09
Cyth4	-1.391	9.42e-09
Mrpl36	-0.948	9.71e-09
Tbc1d1	-1.115	9.76e-09
Stk16	-0.969	9.82e-09
Rgs17	1.655	9.82e-09
Syde2	-0.918	1.06e-08
Hpcal1	1.071	1.06e-08
Sh3d19	-1.105	1.11e-08
Col27a1	-1.854	1.12e-08
Vps16	0.943	1.12e-08
Slco3a1	1.126	1.14e-08
AI593442	1.542	1.31e-08
Rpgrip1l	-1.585	1.32e-08
Nt5c1a	-1.5	1.32e-08
Crem	-1.234	1.32e-08
Uvssa	1.108	1.32e-08
Gipc3	-1.604	1.34e-08
Nudcd1	-1.326	1.34e-08
Mrpl19	-0.952	1.34e-08
Kctd17	-1.368	1.41e-08
Il13ra1	-0.937	1.45e-08
Peds1	0.948	1.45e-08
Rprd1a	-0.859	1.48e-08
Oip5os1	-0.921	1.5e-08
Ift81	-0.95	1.53e-08
Uri1	0.823	1.54e-08
Erc1	-1.044	1.55e-08
Inka1	-1.551	1.57e-08
Sbk1	0.982	1.57e-08
Lrrcc1	-1.097	1.59e-08
2810001G20Rik	1.452	1.6e-08
Ttll11	1.942	1.6e-08
Irx1	1.159	1.61e-08
Intu	-0.944	1.63e-08
Rai14	1.035	1.64e-08
Zfp251	1.001	1.65e-08
Crybg1	1.135	1.65e-08
Tbc1d17	0.912	1.69e-08
Tuba4a	-1.231	1.73e-08
Acsl5	-1.024	1.73e-08
Ahcyl	1.207	1.73e-08
Stab1	-1.276	1.74e-08
Srp68	0.801	1.75e-08
Abhd14a	-1.201	1.77e-08
Ptcd3	-0.862	1.79e-08
1600014C10Rik	-0.87	1.81e-08
Bdnf	1.081	1.81e-08
Erlin2	-0.973	1.82e-08
Xaf1	1.274	1.82e-08
Clcn1	-1.607	1.83e-08
Kdm3a	0.835	1.85e-08
Arhgdib	-1.157	1.87e-08
Vamp8	0.963	2.01e-08
Actr6	-1.188	2.03e-08
Zfp715	-0.866	2.05e-08
Raph1	0.867	2.05e-08
Atosb	0.882	2.07e-08
Cd248	-1.788	2.13e-08
Ncald	-1.204	2.16e-08
Senp8	-1.374	2.22e-08
Ndufaf5	-0.96	2.28e-08
Tbc1d31	-1.443	2.33e-08
Clmn	1.477	2.33e-08
Gatm	-2.061	2.35e-08
C1qtnf7	-1.167	2.36e-08
Nampt	0.973	2.36e-08
Ppp2r3a	-0.916	2.4e-08
Spns2	0.882	2.45e-08
Ifi207	1.298	2.47e-08
Paqr7	-1.374	2.53e-08
Sybu	-1.164	2.55e-08
Cmtm3	-1.057	2.55e-08
Lamb1	-0.924	2.59e-08
Pggt1b	-1.078	2.62e-08
Prr14	0.855	2.63e-08
Proser2	1.166	2.68e-08
Myom3	1.408	2.68e-08
Stard4	-1.177	2.71e-08
Odf2	0.92	2.71e-08
Fnbp4	0.91	2.75e-08
A530013C23Rik	1.58	2.82e-08
Smtnl2	-1.388	2.92e-08
Colec12	-1.058	2.95e-08
Sec24d	-0.884	3.01e-08
Prom1	1.797	3.01e-08
Dynll1	-1.105	3.03e-08
Grb10	-0.863	3.03e-08
Ubb	0.87	3.04e-08
Lrrn4cl	-1.281	3.06e-08
Sulf1	-0.991	3.07e-08
Fktn	-0.879	3.09e-08
Hipk1	0.873	3.17e-08
Tnip2	0.92	3.22e-08
Fam43a	-1.019	3.37e-08
Cavin3	-1.012	3.5e-08
Slc25a13	-0.782	3.53e-08
Tbx3os1	1.526	3.53e-08
Ncoa4	-0.824	3.56e-08
Smc2	-1.825	3.62e-08
Hibch	-0.824	3.62e-08
Zdhhc4	0.977	3.62e-08
Socs3	1.546	3.62e-08
Qsox1	0.839	3.8e-08
Eif1	0.931	3.83e-08
Dcxr	1.26	3.88e-08
Alox5	-1.138	3.89e-08
Nostrin	-1.39	3.97e-08
Pdzd7	1.578	4.05e-08
Pomk	-1.158	4.1e-08
Fgfr3	1.073	4.1e-08
Tmem86a	-0.981	4.12e-08
Zbtb46	-0.947	4.12e-08
Rprd2	0.832	4.12e-08
Ndc1	-0.949	4.4e-08
Calcrl	-0.918	4.46e-08
Echdc1	-1.252	4.56e-08
Irgm1	0.946	4.56e-08
Bmpr1a	-0.801	4.59e-08
Kdm4b	0.943	4.66e-08
Zfp971	-1.235	4.78e-08
Mllt10	0.796	4.9e-08
Gsta4	0.786	4.92e-08
Dclk1	-1.898	4.93e-08
Nfil3	1.21	4.97e-08
Dnajb14	-0.904	5.11e-08
Oma1	-0.829	5.15e-08
Dcaf4	-1.49	5.2e-08
Klhl33	-0.813	5.33e-08
Epb41l4aos	1.504	5.4e-08
Ckb	-1.049	5.47e-08
Pomt1	-1.111	5.51e-08
Igsf9b	-1.368	5.53e-08
Agk	-0.955	5.68e-08
Actr8	0.786	5.77e-08
Brf1	0.975	5.77e-08
Nfkbia	1.256	5.77e-08
Pfn2	-0.792	5.79e-08
Tomm5	-0.92	5.82e-08
Adam10	-0.841	5.83e-08
Gm20300	-0.984	6.14e-08
Adamtsl4	1.057	6.17e-08
Socs5	-0.87	6.27e-08
Uqcc4	-0.841	6.3e-08
Ccdc80	-0.785	6.34e-08
Ttll7	0.891	6.4e-08
Ppip5k1	0.976	6.66e-08
Fam78a	-1.337	6.72e-08
Ephb1	-1.686	6.75e-08
Il20rb	1.564	6.93e-08
Tmem260	-0.988	7.16e-08
Lrrc4b	1.279	7.24e-08
Naalad2	-1.099	7.31e-08
Il6ra	1.1	7.38e-08
Casp8	-1.133	7.59e-08
Ndn	-1.453	7.65e-08
Os9	1.027	7.69e-08
Tmem50a	0.76	7.86e-08
Cox10	0.927	7.93e-08
Prkca	-1.023	7.99e-08
Gusb	-0.9	8.03e-08
Spred2	-0.958	8.15e-08
Arhgap28	-1.455	8.18e-08
Cstf2	-0.953	8.28e-08
Dnaaf9	-0.814	8.28e-08
Pon3	-1.167	8.44e-08
Tilz2	-0.799	8.69e-08
Dcaf12l1	-1.343	9.21e-08
Eml1	-1.034	9.39e-08
Tbc1d5	0.819	1.02e-07
Ppic	-1.059	1.03e-07
Cldnd1	-0.882	1.03e-07
Cacna1s	-0.978	1.04e-07
Sdhaf4	-0.947	1.04e-07
Tgfb1i1	-1.109	1.05e-07
Tmem123	-0.886	1.06e-07
Ermp1	-1.206	1.07e-07
Ncapd2	-0.996	1.07e-07
Tmem150c	-1.391	1.09e-07
Eri1	-1.027	1.09e-07
Arl4a	0.816	1.09e-07
Fbxo44	0.878	1.09e-07
Comt	1.088	1.09e-07
Tppp3	-1.359	1.1e-07
Nup35	-1.311	1.1e-07
Lonrf2	-1.094	1.1e-07
Ppif	-0.734	1.12e-07
Riok3	0.721	1.13e-07
Actc1	-1.344	1.15e-07
Alas1	-0.839	1.17e-07
Higd1b	-1.205	1.18e-07
Samd9l	-1.054	1.2e-07
Trmt2b	-0.758	1.2e-07
Ulk2	-0.73	1.21e-07
Tmem132a	-1.298	1.22e-07
Rapgef5	-0.918	1.22e-07
Dap	-1.023	1.23e-07
Dffa	-0.834	1.24e-07
Cry2	0.843	1.3e-07
Cdc42ep4	0.986	1.31e-07
Rasd1	1.532	1.34e-07
Vps37b	0.989	1.36e-07
Irak3	1.066	1.36e-07
Carmil1	1.428	1.39e-07
Phkg1	-1.063	1.43e-07
Tmem177	-0.956	1.43e-07
Dpy19l1	-1.054	1.5e-07
Spata6l	0.862	1.5e-07
Mir208b	-1.296	1.53e-07
Acbd4	0.904	1.53e-07
Pknox2	-1.216	1.6e-07
Pdp1	-0.793	1.62e-07
Syf2	0.738	1.62e-07
Phka1	0.874	1.62e-07
Tmx3	-0.896	1.66e-07
Ccr2	-2.821	1.68e-07
Ift80	-1.32	1.7e-07
Oxct1	-1.006	1.7e-07
Lzts2	1.077	1.71e-07
Pgap1	-1.352	1.73e-07
Morf4l1	0.736	1.74e-07
Ass1	1.8	1.74e-07
Mtarc2	0.78	1.81e-07
Kcnk2	-1.845	1.82e-07
Lynx1	-0.844	1.82e-07
Naa20	-0.804	1.84e-07
Xiap	-0.888	1.86e-07
Rab7	0.758	1.86e-07
Sacm1l	-0.883	1.88e-07
Washc1	1.014	1.89e-07
Sirpa	-0.982	1.9e-07
Cd200	-0.856	1.9e-07
Patz1	0.803	1.93e-07
Tnfaip1	-0.758	1.94e-07
Cnksr3	1.022	1.94e-07
Aga	-0.848	1.95e-07
Mrrf	-0.792	1.99e-07
Slc7a6	0.831	2.01e-07
Wipf1	-0.923	2.04e-07
Tomm40l	-1.128	2.09e-07
Pacs2	0.925	2.1e-07
2810025M15Rik	0.838	2.11e-07
Zfp933	-1.091	2.14e-07
Mgat3	-1.681	2.17e-07
Dusp1	-1.196	2.22e-07
Tbc1d10c	-1.424	2.23e-07
Cdk5rap3	0.899	2.23e-07
Pcdh17	-1.052	2.24e-07
Gpc6	-1.402	2.25e-07
Gm14410	-1.252	2.27e-07
Ttl	-0.944	2.28e-07
Atp1b2	-0.934	2.3e-07
Zfp449	-1.446	2.31e-07
Kcnj11	0.912	2.31e-07
Ube2n	-0.802	2.32e-07
Thyn1	-0.89	2.41e-07
Flcn	0.949	2.42e-07
Smurf2	-0.816	2.47e-07
Sema6d	-1.019	2.49e-07
Cd300ld	-2.369	2.51e-07
Abcb7	-0.873	2.51e-07
Itgbl1	-1.183	2.53e-07
Trim7	-1.025	2.53e-07
Zfp871	-1.048	2.54e-07
Nipal3	-0.806	2.54e-07
Apbb2	-0.914	2.57e-07
Alg14	-1.059	2.6e-07
Zfhx2	-1.333	2.64e-07
Adipor2	0.806	2.67e-07
Hsd17b12	-0.855	2.69e-07
Gpr155	-0.854	2.72e-07
Hltf	-0.958	2.75e-07
Cpxm2	-1.675	2.76e-07
Kmt2b	1.169	2.76e-07
Get4	0.841	2.77e-07
Shld1	0.94	2.77e-07
Frem2	-1.202	2.8e-07
Rnf11	-0.766	2.83e-07
Ttc21b	-1.159	2.87e-07
Hps3	0.796	2.88e-07
Ccdc28b	0.989	2.9e-07
Eif3g	0.783	2.95e-07
Gata6	0.771	3.09e-07
Pla2r1	-1.402	3.11e-07
Cited2	0.747	3.12e-07
Nfya	-0.948	3.17e-07
Mxd4	0.807	3.17e-07
Pxylp1	-1.341	3.18e-07
Timp3	0.973	3.23e-07
Sec23a	-0.729	3.27e-07
Hnrnpa2b1	-0.81	3.34e-07
Mtfr1	-0.779	3.34e-07
Atf4	0.791	3.34e-07
Bag3	0.828	3.34e-07
Atosa	0.825	3.37e-07
Casq1	-1.849	3.38e-07
Cbx5	-0.831	3.38e-07
Tprn	1.126	3.38e-07
Apmap	-0.777	3.44e-07
Tsfm	-0.816	3.59e-07
Rps6ka5	-0.883	3.66e-07
Cmah	-1.757	3.69e-07
Cish	1.275	3.69e-07
Slc17a9	2.148	3.7e-07
Furin	0.793	3.72e-07
Oplah	0.895	3.78e-07
Mroh1	0.978	3.81e-07
Hsd17b10	0.734	3.82e-07
Uggt2	-0.964	3.84e-07
Lyz2	-0.882	3.84e-07
Timm22	-1.011	3.85e-07
Cyb5r4	-0.783	3.87e-07
Slfn5	-0.86	3.9e-07
Slc16a10	-0.827	3.91e-07
Slc40a1	-1.318	3.95e-07
Skic2	0.927	4e-07
Dach1	-1.052	4.01e-07
Ext1	-0.787	4.02e-07
Zng1	-0.961	4.06e-07
Nqo2	-0.756	4.23e-07
Slc30a9	-0.704	4.23e-07
Tbx5	0.794	4.28e-07
Pla2g5	-1.15	4.3e-07
Tmem25	-1.289	4.33e-07
Rbbp9	-0.893	4.46e-07
Ptma	-0.748	4.57e-07
Pex16	0.809	4.62e-07
Zfp329	-1.133	4.67e-07
C1qtnf2	-1.538	4.71e-07
Zfp612	-0.842	4.71e-07
Trabd2b	0.82	4.71e-07
Ptdss1	-0.728	4.73e-07
Cav1	-0.737	5.05e-07
Vps45	-1.099	5.06e-07
Dph6	-1.099	5.08e-07
Spata24	1.242	5.08e-07
Map1b	-1.193	5.1e-07
Tubb5	-0.768	5.16e-07
Golim4	-0.817	5.3e-07
Gopc	-0.794	5.31e-07
Rgcc	1.121	5.32e-07
Ankrd16	0.805	5.39e-07
Cflar	-0.744	5.53e-07
Strip2	-0.836	5.59e-07
Mcrip2	0.88	5.62e-07
Mllt11	-1.016	5.64e-07
Vwf	1.151	5.78e-07
Dnajc28	-0.93	5.84e-07
Mmut	-0.696	5.87e-07
Emilin2	-0.986	5.93e-07
Man2a2	-0.817	5.93e-07
Appl1	-0.814	5.94e-07
Zfp469	1.854	5.96e-07
Plxnb1	-1.173	6e-07
Casd1	-0.751	6.04e-07
Fbxw2	0.705	6.06e-07
N6amt1	0.75	6.08e-07
Nudt15	-1.181	6.16e-07
Tmem64	-0.745	6.23e-07
Cth	1.55	6.29e-07
Zkscan14	0.984	6.3e-07
Ints10	-0.836	6.59e-07
Nubp2	0.827	6.6e-07
Ccng1	-0.91	6.86e-07
Supv3l1	-0.745	6.86e-07
Tmem126b	-0.736	6.86e-07
Klhdc1	-0.863	6.91e-07
Neil2	1.422	6.91e-07
Cspg4	-1.243	6.94e-07
Rasd2	1.263	6.98e-07
Phtf2	-0.757	7.03e-07
Capn1	-0.87	7.16e-07
Tmem185b	-0.978	7.31e-07
Cpt2	-0.977	7.37e-07
Ablim2	0.775	7.5e-07
2310039H08Rik	1.076	7.57e-07
Olfml3	-0.909	7.59e-07
Ercc6l2	-0.843	7.68e-07
Mgll	-0.83	7.78e-07
Sod1	0.745	7.8e-07
Fgf2	-1.057	7.89e-07
Zfp260	-0.808	7.89e-07
E330011O21Rik	-1.564	7.94e-07
Antxr2	-0.704	7.95e-07
1110002E22Rik	-0.752	8e-07
D3Ertd751e	-0.941	8.22e-07
Sympk	0.777	8.37e-07
Zfyve16	-0.888	8.42e-07
Hyou1	-0.926	8.43e-07
Btbd10	-0.956	8.75e-07
Adgre1	-1.689	8.95e-07
Nppb	1.479	9.03e-07
Cotl1	-1.165	9.12e-07
Myo1e	-1.164	9.22e-07
Wdr82	-0.765	9.22e-07
Ercc1	0.84	9.33e-07
LTO1	-0.902	9.34e-07
Hnrnph1	-0.698	9.38e-07
Hemk1	-0.901	9.5e-07
Edem3	-0.766	9.69e-07
Sbsn	1.468	1e-06
Zbtb22	0.902	1.01e-06
Lhpp	-0.975	1.02e-06
Lman2l	-0.819	1.02e-06
Uba6	-1.112	1.03e-06
Cep97	-1.157	1.04e-06
Pde7a	0.717	1.05e-06
Kcnb1	-0.772	1.07e-06
Ifitm1	1.601	1.08e-06
Fundc1	-0.818	1.09e-06
Prps2	-0.79	1.09e-06
Cdon	-1.254	1.1e-06
Grina	0.804	1.1e-06
Adrm1	0.843	1.1e-06
Lad1	1.933	1.1e-06
Klhl34	-1.325	1.11e-06
Osbpl8	-0.824	1.11e-06
Tmc8	-1.723	1.12e-06
Acer2	0.99	1.13e-06
Lacc1	-1.49	1.14e-06
Prrx1	-0.76	1.19e-06
Mia2	-0.709	1.19e-06
Ptprs	-1.173	1.2e-06
Plcg2	-1.088	1.22e-06
Slc25a15	-0.833	1.22e-06
Cyp27a1	0.781	1.22e-06
Sipa1	-0.916	1.24e-06
Rsu1	-0.759	1.24e-06
Ube3c	-0.683	1.27e-06
Mertk	0.994	1.28e-06
Dse	-1.328	1.29e-06
Pdp2	-0.863	1.29e-06
Nav3	-1.245	1.3e-06
Tigar	0.728	1.31e-06
P3h3	-1.073	1.32e-06
Tppp	-0.812	1.32e-06
Zfp322a	-0.839	1.33e-06
Tbc1d32	-1.284	1.34e-06
Lrif1	0.778	1.34e-06
Six5	-1.351	1.35e-06
Dll4	-0.925	1.35e-06
Sppl2a	-0.708	1.35e-06
Mrps22	-0.799	1.37e-06
Rps27rt	1.539	1.37e-06
4632428C04Rik	-1.331	1.39e-06
Col18a1	-1.445	1.41e-06
Nrn1	-1.187	1.41e-06
Pm20d2	-1.022	1.42e-06
Gm10138	1.535	1.43e-06
Cnpy4	-1.414	1.48e-06
Myof	-1.317	1.48e-06
Paqr9	-1.023	1.49e-06
Mpv17l2	1.046	1.49e-06
Sec22c	-1.065	1.51e-06
Synj2bp	-0.746	1.53e-06
Slit3	1.174	1.53e-06
Wdr62	1.751	1.53e-06
Tsen15	-0.856	1.55e-06
Hus1	-0.956	1.57e-06
Rab21	-0.684	1.59e-06
Asrgl1	0.691	1.61e-06
Trp53inp2	-0.81	1.62e-06
Lmod2	0.87	1.62e-06
Zfp346	0.794	1.64e-06
Vav3	-1.143	1.65e-06
Dixdc1	0.867	1.65e-06
Ino80c	0.73	1.68e-06
Ttf2	-1.253	1.7e-06
Sdccag8	-0.978	1.7e-06
Ap1s2	-0.933	1.7e-06
Fhl1	0.805	1.7e-06
Khk	0.913	1.71e-06
Acad11	-0.771	1.72e-06
Aspn	-1.058	1.73e-06
Hspg2	-1.105	1.74e-06
Ssr1	-0.686	1.74e-06
Ago4	-0.89	1.76e-06
Zfta	-0.872	1.76e-06
Rabac1	0.907	1.76e-06
Cfh	0.859	1.82e-06
Crocc	-1.373	1.84e-06
Pros1	-0.816	1.86e-06
Znrf1	-0.809	1.87e-06
Picalm	0.757	1.88e-06
6230400D17Rik	1.42	1.9e-06
Xxylt1	-0.865	1.92e-06
Phf7	0.942	1.92e-06
Gm8995	-0.842	1.96e-06
Tmem164	-0.92	1.98e-06
Fsd2	-0.836	1.98e-06
Degs1	-0.745	1.98e-06
Bri3	0.739	1.98e-06
Thbd	-0.716	2.01e-06
Tmem150a	-0.945	2.03e-06
Kif21a	-0.779	2.07e-06
Ccdc90b	-0.921	2.08e-06
Plscr5	-1.499	2.11e-06
Nt5e	0.963	2.11e-06
Des	1.087	2.11e-06
Mlf1	-0.682	2.15e-06
Rngtt	-0.829	2.19e-06
Mfsd6	-0.788	2.21e-06
Slco2a1	1.35	2.21e-06
Togaram2	-1.686	2.22e-06
Eef1akmt1	-0.828	2.22e-06
Asl	1.066	2.22e-06
Zfp873	-1.438	2.23e-06
Trp53	-0.878	2.28e-06
Nop53	0.715	2.31e-06
Rap2a	-0.878	2.32e-06
Castor1	0.997	2.32e-06
Exoc3l	-1.376	2.36e-06
Cbr1	-0.739	2.36e-06
Plcd1	0.784	2.39e-06
Pkp4	0.691	2.4e-06
Lysmd2	-0.958	2.43e-06
Ccdc146	-1.46	2.44e-06
Fig4	0.722	2.44e-06
Rnpep	-0.838	2.45e-06
Erlin1	-0.967	2.5e-06
Thnsl1	-0.941	2.5e-06
Gpx3	1.009	2.5e-06
Mmp15	-1.029	2.53e-06
Endod1	-1.141	2.55e-06
Nfkbib	0.933	2.55e-06
Hspa4l	-0.742	2.61e-06
1600020E01Rik	1.221	2.62e-06
Zfp719	-1.168	2.65e-06
Ifi35	0.807	2.74e-06
Ciapin1	0.881	2.74e-06
Abhd18	-0.855	2.75e-06
Ccnl2	0.685	2.77e-06
Tmem11	0.745	2.79e-06
Sgk3	-0.919	2.81e-06
Ppm1l	-0.725	2.81e-06
Rbm41	-1.117	2.82e-06
Dars2	-0.763	2.86e-06
Optn	0.856	2.9e-06
Xrcc2	-1.073	2.92e-06
Vegfc	-1.114	2.93e-06
Trak2	-0.738	2.98e-06
Rasl10b	0.831	2.99e-06
Tmem41b	-0.744	3e-06
Brd8dc	1.901	3e-06
Sra1	0.751	3.02e-06
Galnt7	-0.942	3.07e-06
Nedd1	-0.77	3.07e-06
Tob1	0.943	3.14e-06
Wdr6	-0.933	3.15e-06
Zfp770	-0.911	3.19e-06
Hikeshi	-0.753	3.21e-06
Megf9	-0.715	3.21e-06
Grm1	-0.691	3.25e-06
Msrb1	0.827	3.25e-06
Zpr1	0.718	3.28e-06
Tmem120a	0.944	3.29e-06
Xylt1	-1.541	3.3e-06
Whrn	-0.866	3.33e-06
Fut8	-0.789	3.34e-06
Lman1	-0.678	3.45e-06
Zfp445	0.743	3.46e-06
St6gal1	-0.902	3.48e-06
Bnip2	-0.664	3.49e-06
Septin4	-0.808	3.5e-06
Cntln	-1.207	3.52e-06
Bet1l	0.828	3.55e-06
Josd1	-0.771	3.56e-06
Plat	-0.845	3.57e-06
Etv3	0.754	3.59e-06
Vrk1	0.799	3.59e-06
4631405J19Rik	-1.213	3.6e-06
Arhgef12	-0.717	3.62e-06
Zfp667	-1.215	3.63e-06
Mogs	-1.245	3.67e-06
Card19	1.022	3.67e-06
Nudt5	-1.031	3.75e-06
Pctp	-1.151	3.86e-06
Far1	-0.901	3.89e-06
Tmem266	-1.584	3.92e-06
Cyp51	-0.958	3.92e-06
Tns2	0.977	3.92e-06
Atp6v1a	-0.756	3.96e-06
C130083M11Rik	-1.384	3.97e-06
Apold1	-1.196	3.98e-06
Sorbs3	0.76	3.98e-06
Nrros	-1.28	4e-06
Plp2	0.74	4.02e-06
Akap11	-0.678	4.06e-06
Pitpnc1	-0.735	4.07e-06
Tef	0.895	4.09e-06
6820408C15Rik	-1.61	4.11e-06
Mical3	0.849	4.11e-06
Dpyd	0.779	4.13e-06
Pigq	-0.808	4.15e-06
Apoe	0.787	4.15e-06
Car7	-1.388	4.18e-06
Slc2a8	0.761	4.18e-06
Wdr45	0.794	4.23e-06
Tspan9	-0.73	4.28e-06
Lss	1.39	4.28e-06
Magi3	-0.74	4.29e-06
Jarid2	-0.841	4.3e-06
Dcp2	-0.773	4.3e-06
Dok7	0.929	4.3e-06
Ttyh2	-1.53	4.39e-06
Gps2	0.792	4.42e-06
Foxj3	0.697	4.44e-06
Supt5	0.871	4.46e-06
Gpx8	-0.886	4.47e-06
Fam136a	-0.708	4.47e-06
Rtl8c	-1.375	4.49e-06
Rhoc	-0.75	4.49e-06
Creb1	-0.777	4.54e-06
Antxr1	-0.987	4.6e-06
Zfp160	-0.803	4.6e-06
Popdc3	0.815	4.62e-06
Gm10076	1.196	4.67e-06
Nipsnap3b	-1.201	4.69e-06
Ace	-0.783	4.73e-06
Klhdc7a	-1.122	4.77e-06
P2ry1	-0.936	4.78e-06
Ppm1h	-1.016	4.89e-06
Tmem252	-0.927	4.98e-06
Med12l	-1.27	5.12e-06
Calr	-0.67	5.12e-06
Zmym1	-1.442	5.19e-06
Erp44	-0.715	5.19e-06
Cacybp	-0.673	5.19e-06
Amdhd2	1.091	5.23e-06
Map2k6	-1.178	5.24e-06
Tmem184b	-0.736	5.28e-06
Dact3	-1.362	5.29e-06
Iscu	0.774	5.32e-06
Csf1r	-0.971	5.38e-06
Ubr2	0.889	5.38e-06
Vasp	-0.886	5.39e-06
Clcn3	-0.661	5.4e-06
Yeats2	-0.843	5.42e-06
Clcn4	-0.648	5.43e-06
Tnxb	-1.028	5.55e-06
Nfatc2	-1.027	5.56e-06
Ehmt2	0.739	5.56e-06
Lrrc15	-1.167	5.59e-06
Snrpd1	-0.827	5.59e-06
Ece1	0.739	5.59e-06
Tbc1d20	0.672	5.68e-06
Fosl2	0.908	5.69e-06
Prdm16os	-1.129	5.7e-06
Ak3	-0.67	5.77e-06
Prpf19	0.768	5.81e-06
Tmem106c	-1.112	5.84e-06
Tcf21	-1.18	5.94e-06
Selenoi	-0.744	5.99e-06
Steep1	-0.905	6e-06
Atcay	1.662	6.05e-06
Cidea	0.913	6.07e-06
Gm5424	1.425	6.12e-06
Uvrag	0.704	6.13e-06
Stk38l	-0.794	6.14e-06
Cyp4f17	1.227	6.14e-06
Klhl4	-1.283	6.17e-06
Coa5	-0.64	6.19e-06
Mto1	-0.751	6.2e-06
Cabp1	-1.129	6.29e-06
Cdadc1	-0.681	6.29e-06
Septin8	-0.866	6.32e-06
Mindy2	-0.74	6.35e-06
Gm46430	-0.898	6.39e-06
Mbd1	0.782	6.39e-06
Slc25a19	-0.845	6.41e-06
Zscan20	-0.947	6.44e-06
Scyl3	0.807	6.48e-06
Csk	-0.788	6.5e-06
Gclm	0.732	6.58e-06
Tamalin	0.947	6.58e-06
Vopp1	-0.774	6.61e-06
Nr1d1	-0.827	6.62e-06
Calcoco1	0.755	6.63e-06
Rit1	0.793	6.66e-06
Eif4e	-0.651	6.78e-06
Snhg12	1.037	6.88e-06
Thy1	-1.53	6.91e-06
Rbp7	-1.103	6.95e-06
Mest	-1.404	7.01e-06
Grk5	-0.83	7.01e-06
Mmp2	-0.749	7.13e-06
Kcnip3	1.187	7.18e-06
Cutc	0.731	7.21e-06
Tlcd4	-1.538	7.26e-06
Mapkapk3	-0.844	7.26e-06
Kdsr	0.767	7.3e-06
Synpo2	-0.634	7.43e-06
Ndufaf4	-0.764	7.44e-06
Cnppd1	0.736	7.46e-06
Trir	0.781	7.46e-06
Rp2	-0.948	7.51e-06
Gsdmd	-0.98	7.52e-06
Slc30a6	-1.021	7.6e-06
Unc93b1	-0.943	7.61e-06
Prdx1	-0.712	7.61e-06
Pitpnb	0.639	7.67e-06
Hlcs	0.829	7.67e-06
Smtn	-1.004	7.74e-06
Mrpl49	-0.691	7.74e-06
Gpnmb	2.085	7.91e-06
Slc50a1	0.825	7.96e-06
Iffo1	0.889	7.96e-06
Kcnh2	0.897	8e-06
C1qtnf4	1.223	8.04e-06
Gns	0.666	8.2e-06
Niban1	-0.802	8.28e-06
Gm4544	-1.172	8.33e-06
Cbx1	-0.694	8.39e-06
Chm	-0.835	8.55e-06
Nrxn2	1.561	8.55e-06
Crebrf	0.702	8.73e-06
Zfp976	-1.461	8.79e-06
Lpar6	-1.079	9.08e-06
Wnt11	0.918	9.08e-06
Commd10	-1.065	9.23e-06
Usp20	0.734	9.26e-06
Eef1e1	-0.91	9.29e-06
Inafm1	1.026	9.42e-06
Sacs	-0.662	9.46e-06
Pdcd5	0.706	9.67e-06
Gpt2	-0.669	9.75e-06
Tfb1m	-1.071	9.81e-06
Aggf1	-0.655	9.81e-06
Efnb2	-0.703	9.94e-06
Usp30	0.79	9.97e-06
Cenpj	-1.662	1.01e-05
Agpat1	-0.723	1.01e-05
Aida	-0.715	1.01e-05
Apba1	-1.137	1.02e-05
Cyth2	0.72	1.02e-05
Coro2b	0.987	1.02e-05
Pcif1	0.772	1.04e-05
Lat2	1.448	1.05e-05
Pnck	-1.128	1.06e-05
E4f1	0.847	1.06e-05
Amn1	0.918	1.06e-05
Zfp874b	-0.95	1.07e-05
Epb41l1	-0.902	1.08e-05
Zfp146	-0.68	1.1e-05
C1galt1c1	-0.999	1.11e-05
Zfp866	-0.887	1.11e-05
Yars2	-0.781	1.11e-05
Tgfbr2	0.651	1.11e-05
Psip1	-0.804	1.12e-05
Nudc	0.83	1.12e-05
Zfp36	1.1	1.12e-05
Galnt10	-0.998	1.13e-05
Srbd1	-0.978	1.13e-05
Gtf2h3	-0.855	1.13e-05
Pgm5	-0.682	1.13e-05
Lgi1	-1.048	1.15e-05
Chd6	0.792	1.16e-05
Als2cl	0.804	1.17e-05
As3mt	-0.675	1.18e-05
Stip1	-0.659	1.18e-05
Sfxn2	1.054	1.18e-05
AU041133	-1.505	1.2e-05
Them4	-0.817	1.2e-05
Larp7	-0.657	1.2e-05
Snrpn	0.685	1.2e-05
Mmp14	0.895	1.2e-05
Adgrl2	-0.67	1.23e-05
Or51e1	-1.456	1.24e-05
H2bc21	-0.832	1.24e-05
Tnfaip8	-0.733	1.24e-05
Foxj2	0.644	1.25e-05
Mfsd8	-0.781	1.26e-05
Wnk2	0.844	1.26e-05
Atg4c	-1.134	1.28e-05
Dnaaf3	-1.058	1.28e-05
Snx15	-0.983	1.28e-05
Gm15816	1.308	1.28e-05
Chn1	-0.738	1.29e-05
Cd63	0.7	1.29e-05
Obsl1	-0.747	1.33e-05
2210416O15Rik	0.694	1.33e-05
Ngdn	0.755	1.34e-05
Dram1	-1.133	1.35e-05
B3glct	-1.002	1.35e-05
Cir1	0.717	1.35e-05
Sox6	-0.877	1.36e-05
Cntfr	1.421	1.36e-05
Arl15	-0.887	1.39e-05
Pan2	0.708	1.4e-05
Med25	0.842	1.4e-05
Zfp40	-1.27	1.41e-05
Sorbs1	0.747	1.41e-05
Myc	1.62	1.41e-05
Mfap1b	0.766	1.42e-05
Smad9	1.199	1.42e-05
Mocos	0.989	1.43e-05
Snx27	-0.718	1.44e-05
Pcyox1	-0.695	1.44e-05
Casp3	-1.53	1.45e-05
D330025C20Rik	1.041	1.45e-05
Tox2	1.443	1.46e-05
Daam1	-0.756	1.47e-05
Tle2	-1.126	1.49e-05
Skic3	-0.735	1.49e-05
Mill2	-1.113	1.5e-05
Ghr	-0.623	1.5e-05
Pank1	0.636	1.5e-05
Zswim9	-0.777	1.51e-05
5430431A17Rik	1.178	1.51e-05
Rida	-1.288	1.52e-05
Ezh1	0.722	1.53e-05
Bmf	1.038	1.55e-05
Dck	-1.468	1.57e-05
Eif3b	0.691	1.57e-05
Ranbp6	-0.682	1.58e-05
Hdac2	-0.62	1.58e-05
Rpp25	1.371	1.59e-05
Slc26a2	-0.758	1.6e-05
Dpm1	1.023	1.6e-05
Itfg1	-0.677	1.62e-05
Fam149b	-0.659	1.62e-05
Uevld	-0.905	1.63e-05
Mtrf1l	-0.802	1.63e-05
Mlkl	-1.244	1.64e-05
Entpd5	-0.907	1.64e-05
1810030O07Rik	-0.68	1.64e-05
Ogt	-0.598	1.66e-05
Mfng	-0.919	1.67e-05
Plpp3	-0.627	1.67e-05
Xpc	0.778	1.67e-05
Nck1	-0.737	1.68e-05
Washc4	-0.765	1.69e-05
Gca	-0.748	1.69e-05
Nfrkb	0.701	1.69e-05
Cd2ap	0.674	1.7e-05
Acr	2.039	1.7e-05
Tfdp1	-0.699	1.71e-05
Sema6a	-0.91	1.72e-05
Car8	-0.793	1.72e-05
Clic1	-0.688	1.73e-05
Txndc5	-0.67	1.73e-05
Ccdc9	0.935	1.73e-05
Mis12	-0.824	1.74e-05
Fbxl3	0.691	1.75e-05
Pnpt1	-0.692	1.76e-05
Mcl1	0.668	1.76e-05
Adcy6	0.847	1.76e-05
Tfap4	1.293	1.76e-05
Tmed8	-0.715	1.78e-05
Pds5b	-0.705	1.78e-05
Gm20619	-1.089	1.79e-05
Schip1	-1.011	1.79e-05
Klhl31	-0.678	1.79e-05
Efemp1	-1.105	1.8e-05
Gss	0.759	1.82e-05
Get1	-0.898	1.83e-05
Gtf2ird2	0.858	1.83e-05
Plxdc2	-0.686	1.84e-05
Cul4b	0.786	1.84e-05
Entpd1	0.892	1.84e-05
Snhg16	1.135	1.84e-05
Inf2	0.831	1.85e-05
Gas7	-1.224	1.86e-05
Sh3pxd2a	-0.723	1.88e-05
Tnni3k	-0.682	1.89e-05
Cobll1	0.605	1.89e-05
Dnaja1	-0.668	1.9e-05
Stard10	0.675	1.9e-05
Cyb5d1	-0.945	1.93e-05
Zfp358	0.714	1.93e-05
Zfp442	-1.302	1.94e-05
Smco1	-1.055	1.95e-05
Aqp1	0.699	1.96e-05
Gm5532	0.925	1.97e-05
Zfp697	0.947	1.99e-05
Srpx2	-1.483	2e-05
Cnih4	-0.674	2e-05
Slc39a10	-0.787	2.01e-05
Tmcc2	-0.677	2.01e-05
Mpped2	-0.73	2.02e-05
Myoz2	0.816	2.04e-05
Egflam	-0.809	2.05e-05
Aig1	-0.728	2.05e-05
Sar1a	0.627	2.05e-05
Taok3	-0.85	2.06e-05
Magix	-0.703	2.07e-05
Abca7	0.896	2.07e-05
Ano8	-0.877	2.08e-05
Kdelr2	-0.697	2.08e-05
Lrrc8c	0.647	2.09e-05
Rtn3	-0.62	2.11e-05
Thbs1	-1.167	2.12e-05
Rab20	0.741	2.13e-05
Ifi205	0.848	2.13e-05
Slc2a12	-0.892	2.15e-05
Apool	-0.698	2.15e-05
Fbxo7	0.69	2.16e-05
Ascc1	0.761	2.16e-05
Prkcd	0.706	2.18e-05
Ptp4a3	0.907	2.18e-05
Casp6	-0.928	2.19e-05
Nxpe3	1.204	2.19e-05
Tbc1d4	-0.79	2.21e-05
Zmym5	0.621	2.21e-05
Efemp2	-1	2.25e-05
Ttc27	-0.847	2.31e-05
Parva	-0.623	2.31e-05
Rnf19b	0.751	2.31e-05
Tvp23b	-0.764	2.34e-05
Ehd1	0.643	2.35e-05
Sgcd	-0.804	2.37e-05
Mix23	-0.743	2.37e-05
Plpp5	-0.898	2.38e-05
Gda	0.696	2.39e-05
Dhrs11	0.877	2.41e-05
Rev1	0.839	2.43e-05
Epn3	0.936	2.43e-05
Ptbp2	0.755	2.45e-05
Gm26782	-0.897	2.46e-05
Sema3g	0.771	2.47e-05
Tmem168	-0.703	2.48e-05
2700049A03Rik	-1.083	2.49e-05
Pik3ip1	0.865	2.49e-05
Cipc	0.624	2.51e-05
Tmem71	0.83	2.53e-05
Parp11	-1.215	2.56e-05
Plau	-1.138	2.56e-05
Plxna1	-0.787	2.56e-05
Itm2b	0.728	2.56e-05
Agap2	1.147	2.56e-05
Vgll3	-1.277	2.58e-05
Fam13b	-0.814	2.6e-05
Lrpprc	-0.631	2.6e-05
Usp2	0.696	2.6e-05
Fxyd6	-0.708	2.63e-05
Manea	-0.714	2.66e-05
Mms19	0.702	2.67e-05
Pigs	-0.72	2.7e-05
Ank2	-0.805	2.71e-05
Lactb	-0.719	2.71e-05
Fbxo32	0.624	2.71e-05
Gpr19	1.221	2.71e-05
Lgals1	-0.614	2.74e-05
Dgcr6	0.883	2.75e-05
Sh2d3c	0.892	2.75e-05
Nmrk2	0.963	2.75e-05
Ccdc149	0.76	2.79e-05
Asb18	-0.708	2.8e-05
Bcl9l	0.829	2.8e-05
Cpq	-0.626	2.85e-05
Hmgn5	0.66	2.85e-05
Bbs7	-1.03	2.87e-05
Arhgef9	-0.855	2.9e-05
Tmem70	-0.607	2.9e-05
St6galnac4	-0.75	2.91e-05
Cap1	-0.664	2.91e-05
Lamc1	-0.649	2.92e-05
Eps8	0.752	2.95e-05
Eif2b3	0.72	2.96e-05
Anapc16	0.677	2.97e-05
Zfp324	-1.173	3e-05
Wdr43	0.64	3.03e-05
Gpat3	-1.182	3.05e-05
Jpt2	-1.102	3.09e-05
Mfsd4b5	1.338	3.1e-05
Pdia6	-0.631	3.13e-05
Kctd6	0.761	3.13e-05
Lman2	-0.661	3.14e-05
Efcab14	-0.646	3.17e-05
Gm2810	1.365	3.17e-05
Armcx1	-1.176	3.2e-05
Tlnrd1	-0.852	3.2e-05
Chd7	0.716	3.2e-05
Lrrc20	-0.668	3.21e-05
Rapgef4	-0.626	3.21e-05
Plcb4	0.612	3.21e-05
H2az2	-0.642	3.22e-05
Irs2	0.922	3.24e-05
Rmst	1.585	3.25e-05
Nrap	0.785	3.28e-05
Cd276	-1.059	3.32e-05
Ntn1	0.71	3.32e-05
Ypel3	0.663	3.35e-05
Rtl6	-0.91	3.38e-05
Rmdn3	-0.861	3.41e-05
Cblb	0.735	3.41e-05
Hivep2	-0.778	3.45e-05
Grik5	0.994	3.46e-05
Clptm1	0.656	3.47e-05
Cox15	-0.707	3.51e-05
Dhx36	0.627	3.51e-05
Invs	-1.117	3.53e-05
Rassf9	-0.984	3.53e-05
Pgap2	-0.639	3.53e-05
Fkbp14	-0.8	3.58e-05
Csf1	-0.727	3.62e-05
Adamts3	1.03	3.62e-05
Tmem44	0.734	3.64e-05
Mrpl45	-0.612	3.72e-05
Trmt1	0.691	3.73e-05
Zfp956	1.028	3.73e-05
Map3k21	1.147	3.75e-05
Medag	-1.01	3.77e-05
Syne2	-0.833	3.78e-05
Gtf3c5	-0.965	3.81e-05
Cep15	-0.801	3.81e-05
Tmem106a	-1.185	3.82e-05
Spats2	-0.987	3.82e-05
Eeig1	-0.834	3.82e-05
Uckl1os	-1.55	3.83e-05
Zfp961	-0.91	3.83e-05
Asap2	-0.774	3.86e-05
Pcyt2	0.763	3.87e-05
Pds5a	-0.632	3.9e-05
Pxmp2	0.644	3.9e-05
Abcb1a	0.682	3.9e-05
Atp10d	0.878	3.9e-05
Lyn	-0.796	3.91e-05
Kxd1	0.696	3.91e-05
Colec11	-0.774	3.92e-05
Pcdh1	-0.821	3.95e-05
Cfl1	-0.597	3.97e-05
Gm13375	0.799	4.01e-05
Supt4a	0.632	4.03e-05
Polr2e	0.822	4.06e-05
Reln	1.357	4.06e-05
Pgghg	-1.14	4.07e-05
Etl4	-0.736	4.07e-05
Zfp97	0.868	4.07e-05
Disp1	-0.895	4.12e-05
Slc6a8	0.813	4.13e-05
Dnaaf10	-0.775	4.14e-05
Kank3	0.727	4.15e-05
Cspg4b	-1.521	4.19e-05
Tagap1	0.863	4.19e-05
Eprs1	0.624	4.22e-05
Crls1	-0.707	4.25e-05
Rnf169	0.8	4.25e-05
Slc35g2	-1.149	4.26e-05
Tada3	-0.712	4.26e-05
Fat1	-0.803	4.3e-05
Eeig2	0.661	4.31e-05
Kcnd2	-0.747	4.32e-05
Isoc1	-0.686	4.39e-05
Cdnf	-0.696	4.43e-05
Tnpo3	-0.639	4.43e-05
Odf2l	-0.867	4.47e-05
Dnm3	0.846	4.52e-05
Mustn1	0.958	4.54e-05
Slc35b4	-0.906	4.58e-05
Hlf	-0.787	4.59e-05
Uchl5	0.708	4.59e-05
Rsl1	-1.106	4.61e-05
Llgl2	0.847	4.61e-05
Zfp827	-0.708	4.62e-05
Sc5d	-0.677	4.62e-05
Cab39l	-0.644	4.62e-05
Rnf126	0.748	4.62e-05
Triqk	-1.17	4.64e-05
Dnajc24	-0.934	4.69e-05
Nploc4	0.641	4.7e-05
Ptpn3	-1.067	4.74e-05
Kcnk3	0.645	4.74e-05
Myzap	0.699	4.79e-05
Eml6	-1.041	4.84e-05
Septin6	-0.953	4.88e-05
Adamts7	-0.818	4.88e-05
Man1a	-0.62	4.88e-05
Smarcb1	-0.752	4.89e-05
Fem1a	0.695	4.89e-05
Pgpep1	-0.877	4.95e-05
Nhsl1	-0.858	5.03e-05
Tpgs2	-0.886	5.06e-05
Sptlc2	-0.709	5.08e-05
1700017B05Rik	0.798	5.12e-05
Tmem185a	-0.687	5.19e-05
Pik3c2b	-0.734	5.28e-05
Kcnt1	1.924	5.29e-05
Got1	0.888	5.31e-05
Trmt12	-0.991	5.32e-05
Specc1	-1.397	5.35e-05
Phkb	-0.592	5.35e-05
Armcx5	0.877	5.35e-05
Scaf11	0.562	5.36e-05
Ift20	-0.67	5.38e-05
Pyurf	-0.714	5.41e-05
Zdhhc9	-0.649	5.43e-05
Klhl30	-1.028	5.44e-05
Tnnt2	1.115	5.49e-05
Rragc	0.585	5.54e-05
Stk11ip	0.722	5.59e-05
Snhg8	0.87	5.59e-05
Wbp2	0.613	5.61e-05
Tbp	0.706	5.63e-05
L3hypdh	-0.919	5.64e-05
Xpnpep3	-0.739	5.69e-05
Zfp622	0.697	5.71e-05
Use1	0.668	5.74e-05
Cltb	0.739	5.74e-05
Gm14325	-0.871	5.76e-05
Cpsf4	0.847	5.78e-05
Lmnb2	-0.983	5.79e-05
Gpd1l	0.589	5.8e-05
Cp	0.725	5.88e-05
C2cd3	-0.851	5.89e-05
Echdc2	0.622	5.93e-05
Nup205	-0.698	5.94e-05
Ifrd2	-0.639	5.95e-05
Etnk1	-0.614	6.01e-05
Dnmt1	-0.844	6.02e-05
Crbn	0.599	6.04e-05
Sbno2	0.721	6.04e-05
Gtpbp10	-0.684	6.11e-05
Rnf24	-1.151	6.14e-05
Slc2a4rg-ps	-1.257	6.17e-05
Tra2a	-0.71	6.21e-05
E2f6	-0.587	6.21e-05
Ube2g2	0.646	6.21e-05
Cstf3	-0.799	6.22e-05
Atpsckmt	-0.832	6.24e-05
Garin5a	1.317	6.28e-05
Icam2	-0.683	6.34e-05
Rpl3	0.624	6.35e-05
Rab3il1	-0.881	6.38e-05
Atxn1	-0.765	6.39e-05
Phc2	0.622	6.39e-05
Snx16	-1.011	6.4e-05
Asb12	-0.885	6.44e-05
Gpsm1	0.669	6.49e-05
Tmem117	-0.819	6.51e-05
Sf1	0.702	6.56e-05
Gmnn	0.58	6.64e-05
Asb11	0.793	6.66e-05
Gstm2	0.64	6.67e-05
Chd2	0.649	6.69e-05
Pdzd2	0.733	6.7e-05
Mtmr10	0.649	6.79e-05
Lpar1	-0.901	6.8e-05
Bcl7c	-0.79	6.8e-05
Smo	0.706	6.8e-05
Sfxn4	-0.968	6.83e-05
Chml	-0.841	6.87e-05
Trpv2	-1.313	6.88e-05
Abca1	0.778	6.89e-05
Plxnc1	-1.342	6.91e-05
Zfp14	-0.976	6.92e-05
Blmh	-0.657	6.98e-05
Pdlim3	0.914	6.99e-05
Tspan3	-0.568	7.05e-05
Pgm2l1	-0.782	7.12e-05
Slc43a3	0.65	7.13e-05
Eps8l1	-1.472	7.15e-05
Lpl	1.099	7.17e-05
Bace2	-1.358	7.29e-05
Tmem14c	-0.595	7.32e-05
Trim3	0.735	7.32e-05
Chaserr	0.758	7.32e-05
Rbpms	0.573	7.33e-05
Insr	0.591	7.34e-05
Rbbp5	-0.733	7.36e-05
Exoc4	-0.581	7.36e-05
Capn5	-1.375	7.39e-05
Lrrc42	-0.946	7.4e-05
Mecp2	0.608	7.4e-05
Lsmem2	-1.087	7.55e-05
Tmtc3	-0.786	7.7e-05
Dnaja3	-0.554	7.76e-05
Rpe	-0.962	7.82e-05
Abi2	0.668	7.82e-05
Poglut2	-0.763	7.87e-05
Camk2d	-0.551	7.87e-05
Jph1	0.607	7.89e-05
Setd7	-0.589	7.9e-05
Abcb4	0.562	7.9e-05
Emp3	-0.944	7.96e-05
Igbp1	0.603	7.96e-05
Ahnak	0.808	7.96e-05
Mcrip1	0.812	8e-05
Chst7	-1.183	8.04e-05
Nxt2	-0.852	8.04e-05
Septin10	-0.867	8.05e-05
Cav2	-0.696	8.05e-05
Zkscan5	0.681	8.05e-05
Abcc5	-0.762	8.06e-05
Washc2	0.629	8.07e-05
Kcmf1	0.573	8.11e-05
Lmna	0.734	8.12e-05
Frk	-1.243	8.21e-05
Cntrob	-1.211	8.22e-05
Zfyve21	0.786	8.25e-05
Mtpn	-0.629	8.32e-05
Prrg1	-0.866	8.36e-05
Ifit1bl2	-1.208	8.37e-05
Nr3c2	-0.73	8.37e-05
B3galt6	-1.312	8.49e-05
Capza1	-0.628	8.5e-05
Parp1	-0.63	8.62e-05
[truncated: 9,420 more rows]

## Sheet: Table S3
Supplemental Table S3: Pathway analysis of RNA-seq of left venticles from influenza-infected vs vehicle (PBS)-exposed mice
GO:ID	Description	Gene Ratio	Rich Factor	p-value	q-value	Gene ID	Count
GO:0007015	actin filament organization	0.0403897	0.422505	2.0549e-38	6.38966e-35	Fam107a/Baiap2/Ccn2/Fscn1/Arhgap18/Sh3kbp1/Pik3r1/Tpm4/Lcp1/Lmod3/Myadm/Tmsb4x/Tmsb10/Actg1/Arap1/Whamm/Nrp1/Spta1/Tagln2/Mkks/Myo1b/Rflnb/Clasp1/Xirp1/Ppfia1/Gja1/Twf2/Marcks/Trpv4/Rgs4/Inpp5k/Myh9/Ppm1f/Pls3/Asap3/Synpo2l/Coro1a/Cdc42ep2/Eln/Bin1/Coro6/Arhgef15/Xirp2/Acta1/Add3/S100a10/Nostrin/Pfn2/Arhgap28/Actc1/Cdc42ep4/Carmil1/Washc1/Sirpa/Tnfaip1/Rgcc/Capn1/Cotl1/Myo1e/Lmod2/Msrb1/Sorbs3/Mi…	199
GO:0031589	cell-substrate adhesion	0.0322712	0.432065	2.79557e-32	4.34637e-29	Spock2/Col3a1/Apod/Fam107a/Itga6/Col1a1/Cd34/Ccn2/Ecm2/Postn/Pik3r1/Myadm/Smoc2/Itga9/Col8a1/Itga1/Emilin1/Actg1/Ninj1/Bcl6/Kdr/Tnfrsf12a/Adamts9/Whamm/Nrp1/Hacd1/Dusp3/Gpm6b/Vcam1/Clasp1/Ptpn11/Ldb1/Nid1/Fbln1/Dab2/Fn1/Col5a3/Parvg/Marcks/Jam3/Myh9/Ppm1f/Coro1a/Epdr1/Spry4/S100a10/Col16a1/Lamb1/Ccdc80/Ephb1/Carmil1/Sirpa/Atp1b2/Itgbl1/Hsd17b12/Vwf/Zfp469/Acer2/Rsu1/Mertk/St6gal1/Sorbs3/Antxr1/Ca…	159
GO:0032970	regulation of actin filament-based process	0.0338949	0.415423	2.31843e-31	2.13389e-28	Fam107a/Baiap2/Ccn2/Fscn1/Arhgap18/Pik3r1/Lmod3/Myadm/Tmsb4x/Adrb1/Tmsb10/Actg1/Acta2/Arap1/Whamm/Nrp1/Spta1/Mkks/Gpm6b/Clasp1/Ppfia1/Gja1/Twf2/Rgs4/Inpp5k/Jam3/Pde4b/Myh9/Ankrd23/Ppm1f/Asap3/Synpo2l/Coro1a/Cdc42ep2/Eln/Bin1/Gja5/Dsc2/Arhgef15/Add3/S100a10/Pfn2/Arhgap28/Cdc42ep4/Carmil1/Washc1/Cav1/Rgcc/Capn1/Cotl1/Lmod2/Dixdc1/Sorbs3/Rhoc/Csf1r/Vasp/Synpo2/Wnt11/Coro2b/Hdac2/Nck1/Washc4/Cd2ap/Pr…	167
GO:0042692	muscle cell differentiation	0.0375482	0.395299	2.74502e-31	2.13389e-28	Lox/Pi16/Myh7/Tcf23/Hdac9/Lmod3/Col14a1/Tmsb4x/Adrb1/Adamts15/Actg1/Ninj1/Ccnd2/Selenon/Myom2/Hacd1/Il4ra/Ehd2/Xirp1/Nid1/Xk/Cxcl12/Rgs4/Nr3c1/Myh9/Ankrd23/Synpo2l/Dysf/Bin1/Cxadr/Ifrd1/Bmp4/Cyp26b1/Pmp22/Acta1/Tmem204/Igfbp5/Ramp2/Bdnf/Lamb1/Fktn/Bmpr1a/Cacna1s/Actc1/Mir208b/Gata6/Casq1/Tbx5/Cflar/Cth/Cdon/Myof/Lmod2/Cfh/Bnip2/Popdc3/Cacybp/Csf1r/Nfatc2/Efnb2/Pgm5/Mmp14/Sox6/Myc/Hdac2/Myoz2/Efem…	185
GO:0007264	small GTPase mediated signal transduction	0.0351126	0.404206	1.0354e-30	6.4391e-28	Col3a1/Cnksr1/Baiap2/Arhgap18/Col1a2/Adrb1/Rasgrp3/Plaat1/Bcl6/Nrp1/Psd3/Itpkb/Hmox1/Adgrg1/Synpo2l/Cdc42ep2/Abra/Dok4/Ralgapa1/Ywhaq/Ngf/Amot/Spry4/Cyth4/Syde2/Arhgdib/Arhgap28/Rapgef5/Cdc42ep4/Tnfaip1/Flcn/Cdon/Sipa1/Rsu1/Synj2bp/Rab21/Vav3/Rap2a/Bnip2/Arhgef12/Apoe/Rhoc/Rit1/Chm/Lpar6/Cyth2/Chn1/Ogt/Cd2ap/Sh2d3c/Arhgef9/Eps8/Rapgef4/Ntn1/Csf1/Reln/Lpar1/Chml/Abca1/Eps8l1/Dnaja3/Abi2/Camk2d/Chu…	173
GO:0010563	negative regulation of phosphorus metabolic process	0.0347067	0.397674	2.25512e-29	9.12581e-27	Cdkn1a/Nnt/Ppp1r15a/Xdh/Myadm/Igfbp3/Actb/Ddr2/Wnk1/Aldob/Chordc1/Mgat5/Dusp3/Errfi1/Fbln1/Dusp6/Ptprc/Lrrk2/Inpp5k/Adarb1/Ibtk/Midn/Ctdsp2/Pkia/Ppm1f/Ggnbp2/Spry4/Adora2a/Uri1/Grb10/Dynll1/Socs3/Socs5/Prkca/Spred2/Cry2/Irak3/Washc1/Sirpa/Cnksr3/Dusp1/Cdk5rap3/Flcn/Cav1/Tigar/Trp53/Apoe/Csk/Thy1/Niban1/Aida/Casp3/Ogt/Plpp3/Nck1/Tfap4/Klhl31/Entpd1/Dnaja1/Fbxo7/Prkcd/Pik3ip1/Irs2/Cblb/Lyn/Fem1a/Gp…	171
GO:0045936	negative regulation of phosphate metabolic process	0.0347067	0.397674	2.25512e-29	9.12581e-27	Cdkn1a/Nnt/Ppp1r15a/Xdh/Myadm/Igfbp3/Actb/Ddr2/Wnk1/Aldob/Chordc1/Mgat5/Dusp3/Errfi1/Fbln1/Dusp6/Ptprc/Lrrk2/Inpp5k/Adarb1/Ibtk/Midn/Ctdsp2/Pkia/Ppm1f/Ggnbp2/Spry4/Adora2a/Uri1/Grb10/Dynll1/Socs3/Socs5/Prkca/Spred2/Cry2/Irak3/Washc1/Sirpa/Cnksr3/Dusp1/Cdk5rap3/Flcn/Cav1/Tigar/Trp53/Apoe/Csk/Thy1/Niban1/Aida/Casp3/Ogt/Plpp3/Nck1/Tfap4/Klhl31/Entpd1/Dnaja1/Fbxo7/Prkcd/Pik3ip1/Irs2/Cblb/Lyn/Fem1a/Gp…	171
GO:0001667	ameboidal-type cell migration	0.0369393	0.386412	2.34787e-29	9.12581e-27	Lcn2/Fgf16/Cyp1b1/Loxl2/Glul/Fstl1/Hdac9/Amotl2/Smoc2/Sparc/Gata2/Ddr2/Ets1/Sema3c/Kdr/Acta2/Adamts9/Akap12/Ret/Nrp1/Adam17/Plxnd1/Lgmn/Atoh8/Nrp2/Meox2/Serpinf1/Clasp1/Ptpn11/Lrg1/Prcp/Hmox1/Fn1/Sema6b/Cxcl12/Wnt5a/Myh9/Ppm1f/Vash1/Coro1a/Sox17/Tns1/Bmp4/Pmp22/Amot/Cygb/Arhgdib/Cd248/Pfn2/Prkca/Patz1/Smurf2/Sema6d/Adipor2/Rgcc/Appl1/Fgf2/Plcg2/Dll4/Col18a1/Synj2bp/Vegfc/Fut8/Apoe/Calr/Wnt11/Efnb…	182
GO:0042176	regulation of protein catabolic process	0.0308504	0.411924	3.49268e-28	1.20671e-25	Mylip/Clu/Herpud1/Timp4/Rnf144b/Nos2/Ddrgk1/Gja1/Dab2/Lrrk2/Arih2/Wnt5a/Sco1/Vps11/Nub1/Anxa2/Xpo1/Bmal1/Nqo1/Sox17/Dysf/Rnf144a/Csnk1e/Sh3d19/Ppp2r3a/Ubb/Socs5/Samd9l/Tmem132a/Irak3/Rab7/Mgat3/Cdk5rap3/Timp3/Furin/Cav1/Nudt15/Nop53/Cyp51/Apoe/Crebrf/Mfsd8/Ogt/Cul4b/Rnf19b/Agap2/Bbs7/Cblb/Uchl5/Ptpn3/Asb11/Tmtc3/Laptm4b/Svip/Desi1/Fbxw7/Rchy1/Rhbdf1/Rgma/Chmp6/Trib1/Plk2/Dda1/Gabarapl2/Epm2a/Glmn…	152
GO:0031400	negative regulation of protein modification process	0.0365334	0.38055	4.17715e-28	1.29887e-25	Cdkn1a/Nnt/Ppp1r15a/Xdh/Myadm/Igfbp3/Actb/Wnk1/Snta1/Chordc1/Mgat5/Klf15/Dusp3/Errfi1/Sqstm1/Fbln1/Crtap/Dusp6/Ptprc/Lrrk2/Inpp5k/Adarb1/Ibtk/Ctdsp2/Pkia/Ppm1f/Dysf/Ggnbp2/Spry4/Adora2a/Fry/Socs3/Socs5/Prkca/Spred2/Cry2/Irak3/Sirpa/Cnksr3/Dusp1/Cdk5rap3/Flcn/Cav1/Rasd2/Tppp/Apoe/Gps2/Thy1/Niban1/Aida/Casp3/Hdac2/Ogt/Plpp3/Nck1/Tfap4/Klhl31/Dnaja1/Fbxo7/Prkcd/Cblb/Lyn/Fem1a/Gpd1l/Insr/Dnaja3/Igbp1…	180
GO:0042326	negative regulation of phosphorylation	0.0302415	0.400538	3.86117e-26	1.09147e-23	Cdkn1a/Nnt/Ppp1r15a/Xdh/Myadm/Igfbp3/Actb/Ddr2/Wnk1/Chordc1/Dusp3/Errfi1/Fbln1/Dusp6/Ptprc/Lrrk2/Inpp5k/Adarb1/Ibtk/Midn/Ctdsp2/Pkia/Ppm1f/Ggnbp2/Spry4/Adora2a/Grb10/Dynll1/Socs3/Socs5/Prkca/Spred2/Irak3/Washc1/Sirpa/Cnksr3/Dusp1/Cdk5rap3/Cav1/Tigar/Apoe/Csk/Thy1/Niban1/Aida/Casp3/Ogt/Plpp3/Nck1/Tfap4/Klhl31/Dnaja1/Fbxo7/Prkcd/Pik3ip1/Irs2/Cblb/Lyn/Fem1a/Gpd1l/Atxn1/Insr/Dnaja3/Sfrp1/Camk2n1/Dtnb…	149
GO:0032956	regulation of actin cytoskeleton organization	0.0290237	0.407407	5.12438e-26	1.32784e-23	Fam107a/Baiap2/Ccn2/Fscn1/Arhgap18/Pik3r1/Lmod3/Myadm/Tmsb4x/Tmsb10/Actg1/Arap1/Whamm/Nrp1/Spta1/Mkks/Gpm6b/Clasp1/Ppfia1/Gja1/Twf2/Rgs4/Inpp5k/Jam3/Ankrd23/Ppm1f/Asap3/Synpo2l/Coro1a/Cdc42ep2/Eln/Bin1/Arhgef15/Add3/S100a10/Pfn2/Arhgap28/Cdc42ep4/Carmil1/Washc1/Rgcc/Capn1/Cotl1/Lmod2/Dixdc1/Sorbs3/Rhoc/Csf1r/Vasp/Synpo2/Wnt11/Coro2b/Hdac2/Nck1/Washc4/Cd2ap/Prkcd/Eps8/Cfl1/Kank3/Lpar1/Abi2/Washc2/…	143
GO:0050767	regulation of neurogenesis	0.0367364	0.366397	5.6346e-26	1.34774e-23	Ptprf/Baiap2/Fbxo31/Gata2/Sema3c/Vcan/Eef2k/Heyl/Fstl4/Vim/Kdr/Tnfrsf12a/Cux2/Nrp1/Jade2/Plxnd1/Serpinf1/Fn1/Twf2/Kalrn/Marcks/Sema6b/Cxcl12/Wnt5a/Flt1/Afdn/Caprin1/Anxa2/Mme/Bmal1/Bin1/Ifrd1/Bmp4/Aspa/Epha4/Fas/Ngf/Plxnb3/S100a10/Bdnf/Fgfr3/Bmpr1a/Ulk2/Sema6d/Hltf/Map1b/Plxnb1/Fgf2/Cdon/Ptprs/Dll4/Wdr62/Rab21/Dixdc1/Picalm/Trp53/Xrcc2/Vegfc/Trak2/Apoe/Ace/Csf1r/Prpf19/Mbd1/Nr1d1/Thy1/Obsl1/Myc/H…	181
GO:1902903	regulation of supramolecular fiber organization	0.0312563	0.391858	8.82071e-26	1.95913e-23	Baiap2/Ccn2/Arhgap18/Pik3r1/Lmod3/Myadm/Tmsb4x/Tmsb10/Emilin1/Actg1/Clu/Arap1/Whamm/Nrp1/Spta1/Mkks/Trim54/Clasp1/Ppfia1/Gja1/Fkbp4/Twf2/Trpv4/Rgs4/Inpp5k/Ankrd23/Ppm1f/Asap3/Synpo2l/Coro1a/Cdc42ep2/Eln/Dysf/Bin1/Arhgef15/Add3/S100a10/Pfn2/Arhgap28/Cdc42ep4/Carmil1/Washc1/Cav1/Map1b/Rgcc/Capn1/Cotl1/Nav3/Lmod2/Hspg2/Sorbs3/Apoe/Rhoc/Vasp/Tnxb/Synpo2/Wnt11/Coro2b/Hdac2/Nck1/Washc4/Prkcd/Efemp2/Gda…	154
GO:0040013	negative regulation of locomotion	0.0292267	0.402235	1.58932e-25	3.29463e-23	Col3a1/Apod/Cd74/Cyp1b1/Trp53inp1/Igfbp3/Emilin1/Sema3c/Adamts9/Nrp1/Dusp3/Rin3/Meox2/Serpinf1/Clasp1/Miip/Fbln1/Sema6b/Cxcl12/Adgrg1/Wnt5a/Afdn/Tet1/Adarb1/Myh9/Vash1/Brms1l/Epha4/Fas/Igfbp5/Plxnb3/Dpep1/Cygb/Arhgdib/Sulf1/Bmpr1a/Pfn2/Cd200/Patz1/Dusp1/Atp1b2/Flcn/Sema6d/Adipor2/Cited2/Dach1/Tbx5/Cav1/Rgcc/Emilin2/Fgf2/Ifitm1/Osbpl8/Nav3/Dll4/Synj2bp/Rap2a/St6gal1/Apoe/Calr/Thy1/Wnt11/Cd63/Hdac2…	144
GO:0010631	epithelial cell migration	0.0274	0.411585	3.85829e-25	7.49828e-23	Lcn2/Fgf16/Cyp1b1/Loxl2/Glul/Fstl1/Hdac9/Smoc2/Sparc/Gata2/Ets1/Kdr/Adamts9/Nrp1/Adam17/Plxnd1/Lgmn/Atoh8/Meox2/Serpinf1/Clasp1/Ptpn11/Lrg1/Prcp/Hmox1/Cxcl12/Wnt5a/Myh9/Ppm1f/Vash1/Coro1a/Bmp4/Amot/Pfn2/Prkca/Patz1/Rgcc/Fgf2/Plcg2/Dll4/Col18a1/Synj2bp/Vegfc/Apoe/Calr/Efnb2/Tgfbr2/Cd63/Plpp3/Aqp1/Srpx2/Thbs1/Ptp4a3/Irs2/Mecp2/Clasp2/Fbxw7/Fgf18/Tgfb1/Dusp10/Ptk2b/Glipr2/Itgav/Plk2/Map2k3/Bcas3/Tek…	135
GO:0090132	epithelium migration	0.0274	0.409091	7.7011e-25	1.40861e-22	Lcn2/Fgf16/Cyp1b1/Loxl2/Glul/Fstl1/Hdac9/Smoc2/Sparc/Gata2/Ets1/Kdr/Adamts9/Nrp1/Adam17/Plxnd1/Lgmn/Atoh8/Meox2/Serpinf1/Clasp1/Ptpn11/Lrg1/Prcp/Hmox1/Cxcl12/Wnt5a/Myh9/Ppm1f/Vash1/Coro1a/Bmp4/Amot/Pfn2/Prkca/Patz1/Rgcc/Fgf2/Plcg2/Dll4/Col18a1/Synj2bp/Vegfc/Apoe/Calr/Efnb2/Tgfbr2/Cd63/Plpp3/Aqp1/Srpx2/Thbs1/Ptp4a3/Irs2/Mecp2/Clasp2/Fbxw7/Fgf18/Tgfb1/Dusp10/Ptk2b/Glipr2/Itgav/Plk2/Map2k3/Bcas3/Tek…	135
GO:0090130	tissue migration	0.0274	0.406627	1.52432e-24	2.63324e-22	Lcn2/Fgf16/Cyp1b1/Loxl2/Glul/Fstl1/Hdac9/Smoc2/Sparc/Gata2/Ets1/Kdr/Adamts9/Nrp1/Adam17/Plxnd1/Lgmn/Atoh8/Meox2/Serpinf1/Clasp1/Ptpn11/Lrg1/Prcp/Hmox1/Cxcl12/Wnt5a/Myh9/Ppm1f/Vash1/Coro1a/Bmp4/Amot/Pfn2/Prkca/Patz1/Rgcc/Fgf2/Plcg2/Dll4/Col18a1/Synj2bp/Vegfc/Apoe/Calr/Efnb2/Tgfbr2/Cd63/Plpp3/Aqp1/Srpx2/Thbs1/Ptp4a3/Irs2/Mecp2/Clasp2/Fbxw7/Fgf18/Tgfb1/Dusp10/Ptk2b/Glipr2/Itgav/Plk2/Map2k3/Bcas3/Tek…	135
GO:0022411	cellular component disassembly	0.0340978	0.363636	8.6548e-24	1.41641e-21	Nes/Ccn2/Fscn1/Pik3r1/Retreg1/Lcp1/Lmod3/Chka/Igfbp3/Ddr2/Ets1/Bnip3/Wnk1/Adamts15/Eef2k/Tom1/Spta1/Dusp3/Trim54/Clasp1/Sqstm1/Pnpla2/Atg13/Ddrgk1/Plin3/Twf2/Trpv4/Pbxip1/Gabarapl1/Akap8l/Dysf/Map1lc3b/Epha4/Add3/Mtrfr/Ddit4/Vps16/Vamp8/Irgm1/Ulk2/Dffa/Irak3/Carmil1/Mrrf/Cdk5rap3/Map1b/Fundc1/Nav3/Tigar/Lmod2/Trp53/Optn/Nedd1/Vrk1/Mical3/Wdr45/Cidea/Uvrag/Usp30/Mfsd8/Myc/Mtrf1l/Ogt/Fbxo7/Lamc1/Ep…	168
GO:0031346	positive regulation of cell projection organization	0.0340978	0.362851	1.13304e-23	1.76159e-21	Ptprf/Itga6/Lcn2/Baiap2/Fscn1/Pik3r1/Fbxo31/Ddr2/Eef2k/Tnfrsf12a/Arap1/Ret/Cux2/Nrp1/Adam17/Plxnd1/Ankrd1/Serpinf1/Sphk1/Fn1/Twf2/Kalrn/Marcks/Cxcl12/Wnt5a/Afdn/Caprin1/Cdc42ep2/Bmp4/Epha4/Ngf/Plxnb3/Kctd17/Bdnf/Dynll1/Cdc42ep4/Carmil1/Atp1b2/Map1b/Cflar/Plxnb1/Rab21/Dixdc1/Crocc/Picalm/Fig4/Apoe/Cenpj/Obsl1/Nck1/Efemp1/Aqp1/Ehd1/Plxna1/Eps8/Ntn1/Dhx36/Lyn/Cfl1/Reln/Dnm3/Ift20/Trpv2/Plxnc1/Eps8l1…	168
GO:0010632	regulation of epithelial cell migration	0.022326	0.44	1.57941e-23	2.33864e-21	Lcn2/Fgf16/Glul/Hdac9/Smoc2/Sparc/Gata2/Ets1/Kdr/Adamts9/Nrp1/Adam17/Lgmn/Atoh8/Meox2/Serpinf1/Clasp1/Prcp/Hmox1/Wnt5a/Ppm1f/Vash1/Bmp4/Amot/Pfn2/Prkca/Patz1/Rgcc/Fgf2/Plcg2/Dll4/Col18a1/Synj2bp/Vegfc/Apoe/Calr/Tgfbr2/Cd63/Plpp3/Aqp1/Srpx2/Thbs1/Irs2/Mecp2/Clasp2/Fbxw7/Fgf18/Tgfb1/Dusp10/Ptk2b/Glipr2/Plk2/Map2k3/Bcas3/Tek/Akt1/Enpp2/Spred1/Slit2/Stard13/Bmper/Mef2c/Angpt2/Evl/Tgfb2/Sema5a/Arsb/An…	110
GO:0030198	extracellular matrix organization	0.0263852	0.403727	2.38106e-23	3.36539e-21	Spock2/Col15a1/Col3a1/Lox/Papln/Serpinh1/Col1a1/Ccn2/Ecm2/Fscn1/Postn/P4ha1/Cyp1b1/Loxl2/Col1a2/Lcp1/Col14a1/Col5a1/Pxdn/Smoc2/Col8a1/Ddr2/Matn2/Dpt/Emilin1/Vwa1/Ets1/Adamts15/Col5a2/Scx/Adamts9/Gpm6b/Loxl1/Clasp1/Tmem38b/Nid1/Ltbp4/Fbln1/Crtap/Fn1/Col5a3/Pbxip1/Adamtsl2/Anxa2/Col4a1/Eln/Mmp3/Pmp22/Col16a1/Ramp2/Col27a1/Lamb1/Sulf1/Fktn/Qsox1/Pomt1/Adamtsl4/Ccdc80/Apbb2/Hsd17b12/Ext1/Cav1/Rgcc/Cf…	130
GO:0043542	endothelial cell migration	0.0211082	0.450216	2.87682e-23	3.8893e-21	Lcn2/Fgf16/Cyp1b1/Loxl2/Glul/Fstl1/Hdac9/Smoc2/Sparc/Gata2/Ets1/Kdr/Adamts9/Nrp1/Adam17/Plxnd1/Lgmn/Atoh8/Meox2/Serpinf1/Prcp/Hmox1/Cxcl12/Wnt5a/Myh9/Vash1/Bmp4/Amot/Prkca/Patz1/Rgcc/Fgf2/Dll4/Col18a1/Synj2bp/Vegfc/Apoe/Calr/Efnb2/Plpp3/Srpx2/Thbs1/Ptp4a3/Mecp2/Fbxw7/Fgf18/Tgfb1/Ptk2b/Itgav/Plk2/Map2k3/Bcas3/Tek/Akt1/Spred1/Slit2/Zeb2/Stard13/Bmper/Mef2c/Angpt2/Sema5a/Angpt1/Snai2/Ccbe1/Vstm4/Ptk…	104
GO:0043087	regulation of GTPase activity	0.027603	0.394203	3.28753e-23	4.13314e-21	Itga6/Adrb1/Rasgrp3/Wnk1/Bcl6/Arap1/Plxnd1/Mkks/Arhgap29/Kalrn/Lrrk2/Pbxip1/Rgs4/Wnt5a/Arhgap27/Asap3/Bin1/Arhgef15/Ralgapa1/Epha4/Plxnb3/Amot/S100a10/Tbc1d1/Tbc1d17/Tbc1d5/Rapgef5/Tbc1d10c/Mmut/Plxnb1/Sod1/Sipa1/Rsu1/Vav3/Picalm/Pkp4/Tbc1d20/Thy1/Wnt11/Als2cl/Chn1/Tbc1d4/Plxna1/Agap2/Rapgef4/Cblb/Asap2/Gpsm1/Plxnc1/Cav2/Tsc1/Dock6/Rgma/Ptk2b/Rgs10/Myo9a/Apc2/Ripor2/Dock8/Tbc1d8b/Arrb2/Map2k1/Tbc…	136
GO:0045229	external encapsulating structure organization	0.0263852	0.402477	3.32302e-23	4.13314e-21	Spock2/Col15a1/Col3a1/Lox/Papln/Serpinh1/Col1a1/Ccn2/Ecm2/Fscn1/Postn/P4ha1/Cyp1b1/Loxl2/Col1a2/Lcp1/Col14a1/Col5a1/Pxdn/Smoc2/Col8a1/Ddr2/Matn2/Dpt/Emilin1/Vwa1/Ets1/Adamts15/Col5a2/Scx/Adamts9/Gpm6b/Loxl1/Clasp1/Tmem38b/Nid1/Ltbp4/Fbln1/Crtap/Fn1/Col5a3/Pbxip1/Adamtsl2/Anxa2/Col4a1/Eln/Mmp3/Pmp22/Col16a1/Ramp2/Col27a1/Lamb1/Sulf1/Fktn/Qsox1/Pomt1/Adamtsl4/Ccdc80/Apbb2/Hsd17b12/Ext1/Cav1/Rgcc/Cf…	130
GO:0110053	regulation of actin filament organization	0.0239497	0.421429	3.47989e-23	4.16178e-21	Baiap2/Ccn2/Arhgap18/Pik3r1/Lmod3/Myadm/Tmsb4x/Tmsb10/Actg1/Arap1/Whamm/Nrp1/Spta1/Mkks/Clasp1/Ppfia1/Gja1/Twf2/Rgs4/Inpp5k/Ppm1f/Asap3/Synpo2l/Coro1a/Cdc42ep2/Eln/Bin1/Arhgef15/Add3/S100a10/Pfn2/Arhgap28/Cdc42ep4/Carmil1/Washc1/Rgcc/Capn1/Cotl1/Lmod2/Sorbs3/Rhoc/Vasp/Synpo2/Wnt11/Coro2b/Nck1/Washc4/Prkcd/Eps8/Cfl1/Kank3/Lpar1/Abi2/Washc2/Mtpn/Capza1/Clasp2/Tsc1/Ppp1r9a/Swap70/Ptk2b/Wasf2/Tmod3/N…	118
GO:0030336	negative regulation of cell migration	0.0257763	0.405751	4.51197e-23	5.1395e-21	Col3a1/Apod/Cd74/Cyp1b1/Trp53inp1/Igfbp3/Emilin1/Adamts9/Dusp3/Rin3/Meox2/Serpinf1/Clasp1/Miip/Cxcl12/Adgrg1/Afdn/Tet1/Adarb1/Myh9/Vash1/Brms1l/Epha4/Fas/Igfbp5/Plxnb3/Dpep1/Cygb/Arhgdib/Sulf1/Bmpr1a/Pfn2/Cd200/Patz1/Dusp1/Atp1b2/Flcn/Sema6d/Adipor2/Cited2/Dach1/Tbx5/Cav1/Rgcc/Emilin2/Fgf2/Ifitm1/Osbpl8/Nav3/Dll4/Synj2bp/Rap2a/Apoe/Calr/Thy1/Wnt11/Cd63/Hdac2/Ogt/Thbs1/Mecp2/Sfrp1/Clasp2/Bcl2/Tgfb…	127
GO:0043062	extracellular structure organization	0.0263852	0.401235	4.62799e-23	5.1395e-21	Spock2/Col15a1/Col3a1/Lox/Papln/Serpinh1/Col1a1/Ccn2/Ecm2/Fscn1/Postn/P4ha1/Cyp1b1/Loxl2/Col1a2/Lcp1/Col14a1/Col5a1/Pxdn/Smoc2/Col8a1/Ddr2/Matn2/Dpt/Emilin1/Vwa1/Ets1/Adamts15/Col5a2/Scx/Adamts9/Gpm6b/Loxl1/Clasp1/Tmem38b/Nid1/Ltbp4/Fbln1/Crtap/Fn1/Col5a3/Pbxip1/Adamtsl2/Anxa2/Col4a1/Eln/Mmp3/Pmp22/Col16a1/Ramp2/Col27a1/Lamb1/Sulf1/Fktn/Qsox1/Pomt1/Adamtsl4/Ccdc80/Apbb2/Hsd17b12/Ext1/Cav1/Rgcc/Cf…	130
GO:0051146	striated muscle cell differentiation	0.027603	0.391931	6.19488e-23	6.64235e-21	Pi16/Myh7/Hdac9/Lmod3/Col14a1/Adrb1/Adamts15/Actg1/Ccnd2/Selenon/Myom2/Hacd1/Il4ra/Ehd2/Xirp1/Xk/Cxcl12/Rgs4/Nr3c1/Myh9/Ankrd23/Synpo2l/Dysf/Cxadr/Bmp4/Cyp26b1/Pmp22/Acta1/Igfbp5/Bdnf/Fktn/Bmpr1a/Cacna1s/Actc1/Gata6/Casq1/Tbx5/Cflar/Cdon/Lmod2/Bnip2/Popdc3/Cacybp/Csf1r/Nfatc2/Efnb2/Pgm5/Mmp14/Sox6/Myc/Hdac2/Myoz2/Ehd1/Sgcd/Nrap/Ift20/Tnnt2/Smo/Camk2d/Cav2/Lmna/Tsc1/Chuk/Csrp3/Akap6/Bcl2/Tgfb1/Bhl…	136
GO:0043161	proteasome-mediated ubiquitin-dependent protein catabolic process	0.033083	0.361419	8.44776e-23	8.75603e-21	Fbxo31/Clu/Trim63/Herpud1/Ankrd9/Rnf144b/Ddrgk1/Dab2/Lrrk2/Siah1a/Fbxl22/Arih2/Psmd4/Nub1/Xpo1/Spsb1/Bmal1/Rnf144a/Rhobtb3/Gid4/Psmc1/Pmp22/Csnk1e/Kctd17/Erlin2/Socs5/Os9/Fbxo44/Tnfaip1/Ube2n/Smurf2/Cav1/Klhdc1/Edem3/Znrf1/Nop53/Erlin1/Nrros/Calr/Ubr2/Amn1/Ogt/Cd2ap/Fbxl3/Fbxo7/Rnf19b/Bbs7/Uchl5/Rnf126/Nploc4/Man1a/Fem1a/Crbn/Ube2g2/Trim3/Aup1/Svip/Snhg15/Desi1/Fbxw7/Rchy1/Trib1/Plk2/Dda1/Cdc23/M…	163
GO:2000146	negative regulation of cell motility	0.0263852	0.398773	8.92137e-23	8.94864e-21	Col3a1/Apod/Cd74/Cyp1b1/Trp53inp1/Igfbp3/Emilin1/Adamts9/Dusp3/Rin3/Meox2/Serpinf1/Clasp1/Miip/Fbln1/Cxcl12/Adgrg1/Afdn/Tet1/Adarb1/Myh9/Vash1/Brms1l/Epha4/Fas/Igfbp5/Plxnb3/Dpep1/Cygb/Arhgdib/Sulf1/Bmpr1a/Pfn2/Cd200/Patz1/Dusp1/Atp1b2/Flcn/Sema6d/Adipor2/Cited2/Dach1/Tbx5/Cav1/Rgcc/Emilin2/Fgf2/Ifitm1/Osbpl8/Nav3/Dll4/Synj2bp/Rap2a/Apoe/Calr/Thy1/Wnt11/Cd63/Hdac2/Ogt/Thbs1/Cfl1/Mecp2/Sfrp1/Clasp…	130
GO:0071560	cellular response to transforming growth factor beta stimulus	0.02192	0.435484	1.08174e-22	1.05114e-20	Col3a1/Nrep/Lox/Col1a2/Emilin1/Scx/Twsg1/Adam17/Pbld1/Ankrd1/Ltbp1/Peg10/Lrg1/Ltbp4/Dab2/Fbn1/Nr3c1/Adamtsl2/Tet1/Htra1/Brms1l/Stk16/Bmpr1a/Spred2/Tgfb1i1/Flcn/Smurf2/Cited2/Furin/Cav1/Cflar/Appl1/Aspn/Trp53/Fut8/Nrros/Creb1/Cidea/Pdcd5/Tgfbr2/Sox6/Smad9/Hdac2/Ogt/Thbs1/Bcl9l/Got1/Dnmt1/Cav2/Parp1/Tgfb1/Zeb1/Itgb5/Ing1/Igf1r/Dusp22/Rasl11b/Nlk/Arrb2/Skil/Spred1/Gcnt2/Prdm16/Wfikkn2/Zeb2/Mef2c/Tgf…	108
GO:0071559	response to transforming growth factor beta	0.022123	0.43254	1.32696e-22	1.25035e-20	Col3a1/Nrep/Lox/Col1a2/Emilin1/Scx/Twsg1/Adam17/Pbld1/Ankrd1/Ltbp1/Peg10/Lrg1/Ltbp4/Dab2/Fbn1/Nr3c1/Adamtsl2/Tet1/Htra1/Brms1l/Stk16/Bmpr1a/Spred2/Tgfb1i1/Flcn/Smurf2/Cited2/Furin/Cav1/Cflar/Appl1/Aspn/Trp53/Fut8/Nrros/Creb1/Cidea/Pdcd5/Tgfbr2/Sox6/Smad9/Hdac2/Ogt/Thbs1/Bcl9l/Got1/Dnmt1/Cav2/Parp1/Tgfb1/Zeb1/Itgb5/Ing1/Igf1r/Dusp22/Rasl11b/Nlk/Arrb2/Skil/Spred1/Gcnt2/Prdm16/Wfikkn2/Zeb2/Mef2c/Tgf…	109
GO:0031032	actomyosin structure organization	0.0200934	0.454128	1.45893e-22	1.33427e-20	Myh7/Ccn2/Pik3r1/Lmod3/Actg1/Myh14/Arap1/Nrp1/Myom2/Mkks/Clasp1/Xirp1/Ppfia1/Inpp5k/Myh9/Ankrd23/Ppm1f/Asap3/Synpo2l/Eln/Arhgef15/Acta1/S100a10/Epb41l4a/Pfn2/Arhgap28/Actc1/Carmil1/Tnfaip1/Casq1/Rgcc/Cflar/Lmod2/Sorbs3/Rhoc/Wnt11/Coro2b/Epb41l1/Pgm5/Sorbs1/Hdac2/Myoz2/Nrap/Kank3/Tnnt2/Lpar1/Clasp2/Tsc1/Ppp1r9a/Csrp3/Ptk2b/Itgb5/Epb41l2/Wasf2/Tmod3/Casq2/Cdc42/Zeb2/Limch1/Epb41/Mef2c/Evl/Tgfb3/Rap…	99
GO:0010639	negative regulation of organelle organization	0.0294297	0.374677	3.89608e-22	3.46136e-20	Bcl2l1/Tfrc/Rps6ka2/Pik3r1/Lmod3/Myadm/Tmsb4x/Tmsb10/Bnip3/Arap1/Spta1/Mkks/Trim54/Clasp1/Ppfia1/Fkbp4/Twf2/Lrrk2/Inpp5k/Mcm2/Dync1li1/Coro1a/Dysf/Bmp4/Add3/Fgfr3/Oma1/Pfn2/Arhgap28/Ppif/Carmil1/Flcn/Map1b/Capn1/Ercc1/Cep97/Nav3/Tigar/Lmod2/Trp53/Dcp2/Ehmt2/Usp30/Coro2b/Prkcd/Tbc1d4/Eps8/Cfl1/Kank3/Odf2l/Lpar1/Lmna/Mtpn/Capza1/Parp1/Clasp2/Ppp1r9a/Bok/Atm/Xrcc3/Swap70/Xrcc1/Smarca5/Apc2/Wasf2/Tmo…	145
GO:1990778	protein localization to cell periphery	0.0300386	0.37	5.96298e-22	5.15048e-20	Bcl2l1/Pik3r1/Myadm/Actb/Wnk1/Errfi1/Ehd2/Sqstm1/Ppfia1/Dab2/Kalrn/Ttc7/Inpp5k/Tmbim1/Sco1/Dchs1/Afdn/Anxa2/Cacnb2/Efr3b/Ehd4/Map7/S100a10/Ramp2/Adam22/Vamp8/Adam10/Ift80/Rab7/Sacm1l/Washc1/Pacs2/Gpc6/Kcnj11/Sec23a/Appl1/Kcnb1/Cnpy4/Picalm/Tmem150a/Rap2a/Optn/P2ry1/Lrrc15/Csk/Tamalin/Kcnip3/Lgi1/Mmp14/Sorbs1/Snx27/Ogt/Adcy6/Ehd1/Ank2/Rapgef4/Pgap2/Ift20/Camk2d/Clasp2/Tnik/Numb/Zfyve27/Csrp3/Dlg4/…	148
GO:2001233	regulation of apoptotic signaling pathway	0.0318652	0.359268	1.03776e-21	8.72134e-20	Bcl2l1/Itga6/Cd74/Prodh/Unc5b/Pea15a/Clu/Tnfrsf12a/Herpud1/Ret/Nrp1/Nacc2/Ctsl/Ctsc/Gas1/Hmox1/Serinc3/Dab2/Zfas1/Ptprc/Lrrk2/Siah1a/Cxcl12/Ybx3/Wnt5a/Tmbim1/Steap3/Bmp4/Pmp22/Fas/Adora2a/Uri1/Acsl5/Bdnf/Ubb/Casp8/Ppif/Flcn/Timp3/Atf4/Cav1/Cflar/Cth/Sod1/Hyou1/Grina/Tmc8/Trp53/Sgk3/Septin4/Gclm/Eef1e1/Myc/Bmf/Hdac2/Nck1/Mcl1/Dnaja1/Thbs1/Fbxo7/Prkcd/Agap2/Igbp1/Lmna/Parp1/Sfrp1/Trps1/Plscr1/Fbxw7…	157
GO:0090287	regulation of cellular response to growth factor stimulus	0.0257763	0.393189	1.18886e-21	9.72825e-20	Nrep/Ptprf/Fgf16/Lox/Xdh/Fstl1/Apln/Smoc2/Emilin1/Fstl4/Kdr/Twsg1/Hjv/Nrp1/Adam17/Pbld1/Ltbp1/Peg10/Lrg1/Fbn1/Wnt5a/Adamtsl2/Tet1/Htra1/Bmp4/Brms1l/Tmem204/Ngf/Spry4/Grb10/Sulf1/Spred2/Tgfb1i1/Flcn/Smurf2/Gpr155/Gata6/Cited2/Furin/Cav1/Cflar/Fgf2/Myof/Aspn/Trp53/Vegfc/Tob1/Nrros/Cidea/Cd63/Hdac2/Ogt/Sema6a/Thbs1/Ptp4a3/Bcl9l/Adamts3/Got1/Cav2/Sfrp1/Kcp/Fgf18/Rgma/Tcf4/Tgfb1/Creb3l1/Zeb1/Ing1/Dll1…	127
GO:0034976	response to endoplasmic reticulum stress	0.0225289	0.417293	1.7417e-21	1.38866e-19	Bcl2l1/Pik3r1/Ppp1r15a/Ccnd1/Rcn3/Clu/Herpud1/Tmtc4/Pdia4/Serinc3/Ddrgk1/Lrrk2/Marcks/Pmp22/Erlin2/Alox5/Os9/Ermp1/Fbxo44/Cdk5rap3/Get4/Atf4/Uggt2/Cav1/Hyou1/Edem3/Grina/Trp53/Erlin1/Nrros/Calr/Erp44/Niban1/Crebrf/Casp3/Nck1/Abca7/Thbs1/Pdia6/Nploc4/Man1a/Ube2g2/Tmem117/Tmtc3/Aup1/Svip/Tmem33/Bok/Bcl2/Creb3l1/Dnajb12/Man1b1/Txndc12/Eif2b5/Sgta/Trim13/Ubxn1/Bak1/Rhbdd1/Nck2/Opa1/Ubxn6/Jkamp/Ubxn10…	111
GO:0043254	regulation of protein-containing complex assembly	0.0316623	0.356979	2.89442e-21	2.25003e-19	Baiap2/Tfrc/Fscn1/Arhgap18/Eif4ebp1/Lcp1/Lmod3/Fblim1/Myadm/Tmsb4x/Tmsb10/Clu/Spta1/Mkks/Ptpn11/Gbp2/Fkbp4/Twf2/Fnip2/Jam3/Coro1a/Cdc42ep2/Eln/Mmp3/Bin1/Dut/Fas/Add3/Xaf1/Irgm1/Pfn2/Arhgap28/Tppp3/Riok3/Cdc42ep4/Carmil1/Washc1/Trabd2b/Cav1/Map1b/Capn1/Cotl1/Tmc8/Plcg2/Nav3/Tppp/Lmod2/Trp53/Nop53/Apoe/Rhoc/Creb1/Vasp/Septin8/Aida/Med25/Bmf/Nck1/Sar1a/Prkcd/Gda/Eps8/Cfl1/Kank3/Zfp827/Crbn/Abca1/Mec…	156
GO:0010594	regulation of endothelial cell migration	0.0170489	0.474576	6.88585e-21	5.22229e-19	Lcn2/Fgf16/Glul/Hdac9/Smoc2/Sparc/Gata2/Ets1/Kdr/Adamts9/Nrp1/Adam17/Lgmn/Atoh8/Meox2/Serpinf1/Prcp/Hmox1/Wnt5a/Vash1/Bmp4/Amot/Prkca/Patz1/Rgcc/Fgf2/Dll4/Col18a1/Synj2bp/Vegfc/Apoe/Calr/Plpp3/Srpx2/Thbs1/Mecp2/Fbxw7/Fgf18/Tgfb1/Ptk2b/Plk2/Map2k3/Bcas3/Tek/Akt1/Spred1/Slit2/Stard13/Bmper/Mef2c/Angpt2/Sema5a/Angpt1/Snai2/Ccbe1/Sirt1/Pdcd6/Agt/Efna1/Igf1/Csnk2b/Gfus/Akt3/Pdpk1/Gpi1/Stat5a/Rhoj/Emc1…	84
GO:0010810	regulation of cell-substrate adhesion	0.0200934	0.434211	8.25409e-21	6.05774e-19	Spock2/Apod/Fam107a/Itga6/Col1a1/Ecm2/Postn/Pik3r1/Myadm/Smoc2/Col8a1/Emilin1/Actg1/Ninj1/Bcl6/Kdr/Nrp1/Hacd1/Dusp3/Gpm6b/Clasp1/Ptpn11/Ldb1/Nid1/Fbln1/Dab2/Fn1/Myh9/Ppm1f/Spry4/S100a10/Col16a1/Ccdc80/Carmil1/Hsd17b12/Acer2/Rsu1/St6gal1/Calr/Thy1/Coro2b/Mmp14/Egflam/Thbs1/Efemp2/Plau/Lgals1/Csf1/Cfl1/Clasp2/Tsc1/Bcl2/Ptk2b/Dusp22/Itga5/Tek/Enpp2/Cdc42/Flna/Gcnt2/Limch1/L1cam/Cdk6/Angpt2/Dbn1/Lims…	99
GO:0007160	cell-matrix adhesion	0.0204993	0.429787	8.37707e-21	6.05774e-19	Col3a1/Apod/Fam107a/Itga6/Cd34/Ccn2/Postn/Pik3r1/Itga9/Itga1/Emilin1/Actg1/Ninj1/Bcl6/Kdr/Adamts9/Whamm/Nrp1/Dusp3/Gpm6b/Vcam1/Clasp1/Ptpn11/Ldb1/Nid1/Fn1/Col5a3/Jam3/Myh9/Ppm1f/Epdr1/S100a10/Col16a1/Sirpa/Itgbl1/Zfp469/Acer2/Tnxb/Thy1/Coro2b/Mmp14/Cd63/Sorbs1/Thbs1/Efemp2/Plau/Csf1/Cfl1/Clasp2/Tsc1/Ston1/Bcl2/Ptk2b/Itgav/Itgb5/Tmem8b/Cdh11/Dusp22/Itga5/Tek/Enpp2/Limch1/L1cam/Cdk6/Lims1/Ptpra/Ptk…	101
GO:0001933	negative regulation of protein phosphorylation	0.0263852	0.380117	1.28375e-20	8.87063e-19	Cdkn1a/Nnt/Ppp1r15a/Xdh/Myadm/Igfbp3/Actb/Chordc1/Dusp3/Errfi1/Fbln1/Dusp6/Ptprc/Lrrk2/Inpp5k/Adarb1/Ibtk/Ctdsp2/Pkia/Ppm1f/Ggnbp2/Spry4/Adora2a/Socs3/Socs5/Prkca/Spred2/Irak3/Sirpa/Cnksr3/Dusp1/Cdk5rap3/Cav1/Apoe/Thy1/Niban1/Aida/Casp3/Ogt/Plpp3/Nck1/Tfap4/Klhl31/Dnaja1/Fbxo7/Prkcd/Cblb/Lyn/Fem1a/Gpd1l/Insr/Dnaja3/Sfrp1/Camk2n1/Dtnbp1/Tgfb1/Dusp10/Chmp6/Trib1/Mical1/Fabp4/Epm2a/Heg1/Dusp22/Nppa/…	130
GO:0007265	Ras protein signal transduction	0.0263852	0.380117	1.28375e-20	8.87063e-19	Col3a1/Cnksr1/Baiap2/Col1a2/Adrb1/Rasgrp3/Plaat1/Bcl6/Nrp1/Psd3/Itpkb/Adgrg1/Synpo2l/Cdc42ep2/Abra/Dok4/Ngf/Spry4/Cyth4/Syde2/Arhgdib/Rapgef5/Cdc42ep4/Tnfaip1/Flcn/Rsu1/Synj2bp/Rab21/Rap2a/Arhgef12/Apoe/Rit1/Lpar6/Cyth2/Ogt/Eps8/Rapgef4/Ntn1/Csf1/Lpar1/Abca1/Eps8l1/Abi2/Camk2d/Chuk/Rhobtb1/Plk2/Plce1/Heg1/Wasf2/Rhou/Ssx2ip/Ripor2/Nckap1/Brap/Cdc42/Scai/Map2k1/Stard13/Arfgef2/Gpr17/Tgfb2/Cyth1/Rap…	130
GO:0014706	striated muscle tissue development	0.0241526	0.395349	1.3207e-20	8.92758e-19	Lox/Pi16/Myh7/Cenpf/Hdac9/Col14a1/Adrb1/Sema3c/Adamts9/Ppp1r13l/Ccnd2/Ankrd1/Xirp1/Gja1/Rgs4/Wnt5a/Nr3c1/Dipk2a/Aldh1a2/Gja5/Cxadr/Ifrd1/Bmp4/Xirp2/Bdnf/Bmpr1a/Casp8/Actc1/Kcnk2/Kcnj11/Gata6/Cited2/Tbx5/Fgf2/Cdon/Dll4/Hspg2/Jarid2/Creb1/Cacybp/Efnb2/Tgfbr2/Pgm5/Sox6/Hdac2/Sgcd/Chd7/Nrap/Ift20/Tnnt2/Camk2d/Lmna/Mrtfb/Tsc1/Csrp3/Akap6/Tgfb1/Rpl3l/Heg1/Lrrc10/Lrrc27/Zmpste24/Dll1/Slc25a4/Irx3/Arrb2/…	119
GO:0001558	regulation of cell growth	0.0324741	0.348584	1.36906e-20	9.05755e-19	Cdkn1a/Fam107a/Pi16/Sesn1/Cirbp/Col14a1/Igfbp3/Igfbp7/Adrb1/Sema3c/Plaat1/Mndal/Fstl4/Bcl6/Tnfrsf12a/Nrp1/Adam17/Ahsg/Tspyl2/Gas1/Sphk1/Cxcl16/Gja1/Dab2/Fn1/Twf2/Sema6b/Cxcl12/Rgs4/Wnt5a/Nr3c1/Afdn/Sox17/Ifrd1/Igfbp5/Ngf/Uri1/Bdnf/Adam10/Ulk2/Ttl/Sema6d/Adipor2/Map1b/N6amt1/Cth/Supv3l1/Mgll/Nppb/Ptprs/Slit3/Rab21/Fhl1/Picalm/Trp53/Apoe/Dact3/Wnt11/Lgi1/Mmp14/Sema6a/Sema3g/Ntn1/Cfl1/Smarcb1/Trpv2/…	160
GO:0034248	regulation of amide metabolic process	0.0334889	0.342324	2.77673e-20	1.79878e-18	Tent5b/Cirbp/Eif4ebp1/Cyp1b1/Ppp1r15a/Rbm3/Mknk2/Eef2k/Aldob/Clu/Vim/Hsd11b1/Limd1/Ncbp2/Sphk1/Mettl16/Taco1/Tnrc6a/Caprin1/Rmnd1/Bin1/Epha4/Csnk1e/Igfbp5/Per1/Ptcd3/Eif1/Prkca/Dap/Tsfm/Tigar/Mpv17l2/Ago4/Picalm/Trp53/Tob1/Apoe/Dcp2/Calr/Atcay/Eif4e/Niban1/Pcif1/Zfp36/Ngdn/Pan2/Casp3/Rida/Eif3b/Ogt/Nck1/Pnpt1/Abca7/Rtn3/Thbs1/Prkcd/Lrpprc/Dhx36/Eprs1/Ifrd2/Trim3/Exosc5/Tsc1/Nsun4/Ogfod1/Akap6/Ptk…	165
GO:0009100	glycoprotein metabolic process	0.0267912	0.372881	4.58282e-20	2.9082e-18	Galnt15/Pcsk6/St8sia4/Gal3st2c/Tmtc2/B3galnt2/Pmm1/Mgat5/Tmtc1/Tmtc4/Ctsl/Gxylt2/Poglut3/Tet1/Manba/Itm2a/Alg9/Magt1/Gfpt1/Galnt11/Sulf1/Fktn/Pomk/Pomt1/Gusb/Fbxo44/Dpy19l1/Aga/Mgat3/Alg14/Pxylp1/Uggt2/Ext1/Man2a2/Edem3/Acer2/Dse/Xxylt1/Trak2/Galnt7/Xylt1/Fut8/St6gal1/Mogs/Erp44/C1galt1c1/Galnt10/Dpm1/Entpd5/Ogt/Abca7/Itm2b/St6galnac4/Tmem106a/Mustn1/Man1a/Adamts7/Bace2/Insr/Tmtc3/Poglut2/Chst7/B…	132
GO:0034329	cell junction assembly	0.033286	0.340956	5.69153e-20	3.53953e-18	Apod/Fam107a/Fscn1/Sdk2/Pik3r1/Thbs2/Actb/Actg1/Eef2k/Kdr/Whamm/Cux2/Nrp1/Plxnd1/Dusp3/Gpm6b/Clasp1/Ptpn11/Ldb1/Gja1/Fn1/Trpv4/Wnt5a/Afdn/Jam3/Myh9/Ppm1f/Tns1/Gja5/Arhgef15/Pmp22/Mdga1/S100a10/Col16a1/Ramp2/Bdnf/Hipk1/Ephb1/Lrrc4b/Prkca/Pcdh17/Flcn/Tbx5/Cav1/Plxnb1/Ptprs/Rap2a/Pkp4/Rhoc/Ace/Thy1/Nrxn2/Wnt11/Efnb2/Coro2b/Mmp14/Adgrl2/Sorbs1/Ogt/Srpx2/Arhgef9/Lamc1/Ntn1/Cfl1/Reln/Dnm3/Mecp2/Abi2/Ca…	164
GO:0007517	muscle organ development	0.0282119	0.363874	6.04325e-20	3.68458e-18	Col3a1/Lox/Myh7/Tcf23/Ky/Cenpf/Hdac9/Lmod3/Heyl/Scx/Myh14/Selenon/Ankrd1/Meox2/Egr1/Maff/Gja1/Xk/Ybx3/Wnt5a/Adarb1/Bmal1/Eln/Dysf/Bmp4/Cyp26b1/Xirp2/Pmp22/Acta1/Bdnf/Prr14/Fktn/Bmpr1a/Ephb1/Cacna1s/Actc1/Cited2/Cav1/Cflar/Cdon/Dll4/Fhl1/Des/Creb1/Popdc3/Tcf21/Cntfr/Myc/Myoz2/Efemp2/Usp2/Bcl9l/Chd7/Gtf3c5/Disp1/Hlf/Tnnt2/Chd2/Smo/Jph1/Cav2/Lmna/Rbfox1/Tcf15/Mrtfb/Dtnbp1/Snhg15/Csrp3/Fzd2/Bcl2/Tgfb…	139
GO:0032535	regulation of cellular component size	0.0296326	0.355231	9.17664e-20	5.48741e-18	Baiap2/Arhgap18/Ppp1r15a/Lmod3/Myadm/Tmsb4x/Tmsb10/Sema3c/Wnk1/Fstl4/Tnfrsf12a/Ret/Nrp1/Spta1/Mkks/Rin3/Fn1/Twf2/Sema6b/Xk/Cxcl12/Wnt5a/Coro1a/Cdc42ep2/Eln/Bin1/Ifrd1/Add3/Ngf/Lrrc8a/Bdnf/Pfn2/Arhgap28/Ulk2/Cdc42ep4/Carmil1/Washc1/Ttl/Sema6d/Map1b/Capn1/Mgll/Cotl1/Ptprs/Rab21/Lmod2/Picalm/Apoe/Creb1/Vasp/Clcn3/Ogt/Nck1/Sema6a/Inf2/Aqp1/Prkcd/Sema3g/Eps8/Ntn1/Kxd1/Cfl1/Kank3/Trpv2/Mtpn/Capza1/Clas…	146
GO:0072659	protein localization to plasma membrane	0.0245586	0.384127	1.01468e-19	5.95305e-18	Bcl2l1/Pik3r1/Actb/Wnk1/Errfi1/Ehd2/Sqstm1/Ppfia1/Dab2/Ttc7/Inpp5k/Tmbim1/Sco1/Dchs1/Afdn/Anxa2/Cacnb2/Efr3b/Ehd4/Map7/S100a10/Ramp2/Vamp8/Rab7/Washc1/Pacs2/Kcnj11/Sec23a/Appl1/Kcnb1/Cnpy4/Picalm/Tmem150a/Rap2a/Optn/P2ry1/Lrrc15/Csk/Tamalin/Kcnip3/Mmp14/Sorbs1/Snx27/Adcy6/Ehd1/Ank2/Pgap2/Ift20/Camk2d/Clasp2/Tnik/Numb/Zfyve27/Csrp3/Wdr59/Tgfb1/Epm2a/Abca12/Akt1/Lgals3/Flna/Ldlrap1/Palm/Rab31/Rab3a…	121
GO:0097193	intrinsic apoptotic signaling pathway	0.0251674	0.379205	1.24493e-19	7.16867e-18	Cdkn1a/Bcl2l1/Cd74/Pik3r1/Cyp1b1/Prodh/Bnip3/Clu/Herpud1/Perp/Nacc2/Hmox1/Serinc3/Zfas1/Lrrk2/Siah1a/Cxcl12/Ybx3/Fnip2/Steap3/Hic1/Ppm1f/Eda2r/Ddit4/Uri1/Ubb/Hipk1/Prkca/Ppif/Flcn/Atf4/Cav1/Mllt11/Sod1/Hyou1/Grina/Trp53/Septin4/Myc/Casp3/Hdac2/Nck1/Mcl1/Dnaja1/Fbxo7/Casp6/Zfp622/Tmem117/Parp1/Plscr1/Fbxw7/Bok/Bcl2/Atm/Creb3l1/Sfn/Txndc12/Akt1/Cycs/Skil/Map2k1/Phlda3/Daxx/Pdk2/Bak1/Cdkn2d/Aldh2/Nc…	124
GO:0022604	regulation of cell morphogenesis	0.022326	0.397112	2.499e-19	1.41283e-17	Ptprf/Baiap2/Arhgap18/Sh3kbp1/Fblim1/Sparc/Fgd4/Fbxo31/Eef2k/Kdr/Myh14/Arap1/Limd1/Cux2/Spta1/Plxnd1/Fn1/Kalrn/Marcks/Wnt5a/Afdn/Ighm/Caprin1/Myh9/Coro1a/Cdc42ep2/Epha4/Plxnb3/Sh3d19/Cdc42ep4/Strip2/Plxnb1/Rab21/Ago4/Picalm/P2ry1/Csf1r/Obsl1/Gas7/Parva/Plxna1/Bcl9l/Eps8/Dhx36/Cfl1/Reln/Lpar1/Plxnc1/Mecp2/Tnik/Numb/Wls/Dlg4/Ptk2b/Epb41l2/Myo9a/Fmnl1/Rhou/Zmpste24/Enpp2/Syne3/Zranb1/Palm/Bves/Epb41…	110
GO:0045862	positive regulation of proteolysis	0.0274	0.362903	2.69757e-19	1.48451e-17	Ccn2/Xdh/Rcn3/Clu/Herpud1/Ret/Perp/Ctsl/Lgmn/Rnf144b/Ctsc/Ddrgk1/Dab2/Lrrk2/Arih2/Nub1/Myh9/Ppm1f/Rnf144a/Epha4/Csnk1e/Fas/Ngf/S100a10/Hspd1/Sh3d19/Socs5/Casp8/Tgfb1i1/Dap/Cav1/Acer2/Picalm/Nop53/Apoe/Antxr1/Pdcd5/Mmp14/Myc/Hdac2/Ogt/Tfap4/Rnf19b/Bbs7/Lyn/Cfl1/Tmtc3/Dnaja3/Sox7/Rest/Fbxw7/Rchy1/Bok/Rgma/Trib1/Ptk2b/Plk2/Dda1/Trib2/Akt1/Sgta/Cycs/Bak1/Rhbdd1/Pacsin3/Uaca/Mdm2/Snx9/Ccbe1/Prelid1/St…	135
GO:0045765	regulation of angiogenesis	0.0239497	0.384365	2.72127e-19	1.48451e-17	Cd34/Cyp1b1/Ppp1r15a/Glul/Tspan12/Thbs2/Smoc2/Sparc/Gata2/Emilin1/Ets1/Wnk1/Ninj1/Kdr/Tnfrsf12a/Adamts9/Nrp1/Plxnd1/Serpinf1/Lrg1/Sphk1/Hmox1/Wnt5a/Flt1/Vash1/Amot/Ramp2/Stab1/Sulf1/Alox5/Prkca/Ccr2/Flcn/Gata6/Rgcc/Emilin2/Fgf2/Synj2bp/Vegfc/Aggf1/Tgfbr2/Foxj2/Sema6a/Aqp1/Thbs1/Mecp2/Pde3b/Fgf18/Tcf4/Jmjd8/Creb3l1/Ptk2b/Plk2/Tlr3/Ppp1r16b/Dll1/Itga5/Tek/Lgals3/Spred1/Jak1/Stard13/Bmper/Ptgis/Angp…	118
GO:1901342	regulation of vasculature development	0.0241526	0.382637	2.92565e-19	1.56849e-17	Cd34/Cyp1b1/Ppp1r15a/Glul/Tspan12/Thbs2/Smoc2/Sparc/Gata2/Emilin1/Ets1/Wnk1/Ninj1/Kdr/Tnfrsf12a/Adamts9/Nrp1/Plxnd1/Serpinf1/Lrg1/Sphk1/Hmox1/Wnt5a/Flt1/Vash1/Amot/Ramp2/Stab1/Sulf1/Alox5/Adam10/Prkca/Ccr2/Flcn/Gata6/Rgcc/Emilin2/Fgf2/Synj2bp/Vegfc/Aggf1/Tgfbr2/Foxj2/Sema6a/Aqp1/Thbs1/Mecp2/Pde3b/Fgf18/Tcf4/Jmjd8/Creb3l1/Ptk2b/Plk2/Tlr3/Ppp1r16b/Dll1/Itga5/Tek/Lgals3/Spred1/Jak1/Stard13/Bmper/Ptg…	119
GO:0016055	Wnt signaling pathway	0.0318652	0.341304	3.17715e-19	1.67445e-17	Col1a1/Amotl2/Ccnd1/Wnk1/Limd1/Lmbr1l/Klf15/Egr1/Ldb1/Nid1/Dab2/Lgr6/Lrrk2/Siah1a/Pbxip1/Wnt5a/Hic1/Foxo3/Bmal1/Sox17/Csnk1e/Ppp2r3a/Grb10/Sulf1/Fgfr3/Tgfb1i1/Tmem132a/Ift80/Lzts2/Xiap/Ttc21b/Cmah/Ext1/Trabd2b/Cav1/Tmem64/Fgf2/Dixdc1/Apoe/Dact3/Calcoco1/Grk5/Wnt11/Wnk2/Myc/Daam1/Tle2/Hdac2/Plpp3/Bcl9l/Invs/Ift20/Crbn/Sox7/Lzic/Sfrp1/Leo1/Tnik/Usp34/G3bp1/Wls/Fzd2/Fam53b/Tgfb1/Med12/Bcl7b/Epm2a/Ap…	157
GO:0048638	regulation of developmental growth	0.0290237	0.353086	4.08288e-19	2.11593e-17	Cdkn1a/Pi16/Col14a1/Adrb1/Sema3c/Fstl4/Tnfrsf12a/Ccnd2/Nrp1/Mkks/Lgmn/Gja1/Dusp6/Fn1/Twf2/Siah1a/Sema6b/Cxcl12/Ybx3/Rgs4/Wnt5a/Nr3c1/Afdn/Cxadr/Ifrd1/Ngf/Bdnf/Fgfr3/Bmpr1a/Ulk2/Kcnk2/Ttl/Sema6d/Gata6/Cited2/Tbx5/Map1b/Mgll/Sod1/Fgf2/Ptprs/Rab21/Picalm/Apoe/Jarid2/Creb1/Fosl2/Tgfbr2/Ghr/Hdac2/Sema6a/Sema3g/Chd7/Ntn1/Csf1/Cfl1/Smo/Trpv2/Insr/Mecp2/Suv39h1/Clasp2/Zfyve27/Akap6/Bcl2/Rgma/Ankrd26/Sema…	143
GO:0198738	cell-cell signaling by wnt	0.0318652	0.339827	5.07561e-19	2.58729e-17	Col1a1/Amotl2/Ccnd1/Wnk1/Limd1/Lmbr1l/Klf15/Egr1/Ldb1/Nid1/Dab2/Lgr6/Lrrk2/Siah1a/Pbxip1/Wnt5a/Hic1/Foxo3/Bmal1/Sox17/Csnk1e/Ppp2r3a/Grb10/Sulf1/Fgfr3/Tgfb1i1/Tmem132a/Ift80/Lzts2/Xiap/Ttc21b/Cmah/Ext1/Trabd2b/Cav1/Tmem64/Fgf2/Dixdc1/Apoe/Dact3/Calcoco1/Grk5/Wnt11/Wnk2/Myc/Daam1/Tle2/Hdac2/Plpp3/Bcl9l/Invs/Ift20/Crbn/Sox7/Lzic/Sfrp1/Leo1/Tnik/Usp34/G3bp1/Wls/Fzd2/Fam53b/Tgfb1/Med12/Bcl7b/Epm2a/Ap…	157
GO:0055001	muscle cell development	0.0198904	0.415254	5.82153e-19	2.91966e-17	Lox/Pi16/Myh7/Hdac9/Lmod3/Col14a1/Adrb1/Actg1/Selenon/Myom2/Xirp1/Xk/Rgs4/Nr3c1/Ankrd23/Synpo2l/Dysf/Bin1/Cxadr/Bmp4/Pmp22/Acta1/Ramp2/Bmpr1a/Cacna1s/Actc1/Mir208b/Casq1/Tbx5/Cflar/Myof/Lmod2/Nfatc2/Pgm5/Hdac2/Myoz2/Efemp2/Sgcd/Ank2/Nrap/Tnnt2/Smo/Tmtc3/Camk2d/Cav2/Lmna/Chrnb1/Csrp3/Akap6/Fer1l5/Bcl2/Lrrc10/Lrrc27/Lncpint/Zmpste24/Tmod3/Casq2/Slc25a4/Uchl1/Wfikkn2/Bves/Mef2c/Trip10/Bin3/Myorg/Ctd…	98
GO:0009895	negative regulation of catabolic process	0.0259793	0.366762	8.33196e-19	4.11238e-17	Tent5b/Cirbp/Tent5a/Etfbkmt/Wnk1/Timp4/Nos2/Hmox1/Ddrgk1/Lrrk2/Mettl16/Sco1/Anxa2/Nqo1/Dysf/Ddit4/Nampt/Qsox1/Tmem132a/Dap/Dffa/Irak3/Washc1/Mgat3/Cdk5rap3/Flcn/Timp3/Furin/Tigar/Trp53/Nop53/Tob1/Wdr6/Cyp51/Ehmt2/Cidea/Stk38l/Usp30/Zfp36/Bmf/Ogt/Mcl1/Agap2/Lrpprc/Dhx36/Uchl5/Ptpn3/Rragc/Laptm4b/Tsc1/Svip/Pde3b/Nsun2/Bcl2/Phax/Gabarapl2/Ybx2/Akt1/Sgta/Golga2/Flna/Azin1/Hnrnpc/Ubxn1/Rubcn/Mlst8/Dkc…	128
GO:0010506	regulation of autophagy	0.0233408	0.383333	9.86366e-19	4.79231e-17	Sesn1/Trp53inp1/Bnip3/Wnk1/Atg101/Kdr/Tom1/Sesn3/Sqstm1/Atg13/Hmox1/Lrrk2/Foxo3/Rnf152/Nampt/Qsox1/Irgm1/Ulk2/Dap/Washc1/Flcn/Bag3/Acer2/Tigar/Trp53/Optn/Wdr6/Wdr45/Supt5/Ehmt2/Uvrag/Stk38l/Usp20/Usp30/Mfsd8/Dram1/Bmf/Mcl1/Fbxo7/Sptlc2/Rragc/Gpsm1/Smo/Tsc1/Svip/Rnf31/Fbxw7/Bok/Bcl2/Atm/Plk2/Epm2a/Trim65/Zmpste24/Slc25a4/Akt1/Golga2/Map2k1/Trim13/C9orf72/Rubcn/Mlst8/Nrbp2/Scoc/Fez2/Ulk1/Soga1/Atg5…	115
GO:0071900	regulation of protein serine/threonine kinase activity	0.0255734	0.367347	1.33984e-18	6.40956e-17	Cdkn1a/Ccnd1/Fgd4/Actb/Chordc1/Ccnd2/Adam17/Tcim/Dab2/Ptprc/Lrrk2/Marcks/Wnt5a/Inpp5k/Flt1/Dipk2a/Pkia/Pmp22/Epha4/Spry4/Irgm1/Irak3/Dusp1/Cdk5rap3/Cav1/Rgcc/Ccng1/Fgf2/Apoe/Magi3/Map2k6/Tnxb/Uvrag/Csk/Thy1/Synpo2/Cnppd1/Aida/Casp3/Ghr/Tfap4/Dnaja1/Taok3/Thbs1/Fbxo7/Prkcd/Lyn/Fem1a/Insr/Sfrp1/Dtnbp1/Pde5a/Akap6/Fgf18/Tgfb1/Dusp10/Trib1/Ptk2b/Fgd2/Heg1/Sfn/Etaa1/Trib2/Nppa/Map4k2/Ccnh/Akt1/Traf6/M…	126
GO:0007179	transforming growth factor beta receptor signaling pathway	0.0178608	0.429268	2.83592e-18	1.33609e-16	Col3a1/Nrep/Lox/Col1a2/Emilin1/Twsg1/Adam17/Pbld1/Ltbp1/Peg10/Lrg1/Ltbp4/Dab2/Fbn1/Adamtsl2/Tet1/Htra1/Brms1l/Bmpr1a/Spred2/Tgfb1i1/Flcn/Smurf2/Cited2/Furin/Appl1/Aspn/Trp53/Fut8/Nrros/Creb1/Cidea/Tgfbr2/Smad9/Hdac2/Ogt/Thbs1/Bcl9l/Got1/Cav2/Parp1/Tgfb1/Zeb1/Itgb5/Ing1/Dusp22/Rasl11b/Nlk/Arrb2/Skil/Spred1/Gcnt2/Prdm16/Wfikkn2/Zeb2/Tgfb2/Smad7/Tgfb3/Pmepa1/Ldlrad4/Bambi/Ptk2/Cav3/Appl2/Sirt1/Usp9x…	88
GO:1901652	response to peptide	0.0314593	0.334052	5.17127e-18	2.39999e-16	Col3a1/Ptprf/Serpina3n/Cdo1/Pik3r1/Eif4ebp1/Hdac9/Aldob/Vim/Lgmn/Ahsg/Klf15/Vcam1/Sesn3/Stxbp4/Serpinf1/Ptpn11/Egr1/Gja1/Marcks/Trpv4/Srsf5/Inpp5k/Sco1/Epha4/Grb14/Stat2/Gatm/Grb10/Socs3/Nfkbia/Prkca/Cry2/Cav1/Appl1/Capn1/Adrm1/Osbpl8/Khk/Trp53/Plcd1/Tns2/Slc2a8/Creb1/Cacybp/Fosl2/Csk/Mmp2/Sorbs1/Ghr/Ogt/Nck1/Adcy6/Prkcd/Tbc1d4/Eif2b3/Irs2/Cfl1/Eprs1/Lpl/Insr/Cav2/Nr3c2/Parp1/Cad/Tsc1/Chuk/Pde3b/…	155
GO:0031345	negative regulation of cell projection organization	0.0186726	0.41629	5.63959e-18	2.57885e-16	Ptprf/Mylip/Sema3c/Fstl4/Vim/Nrp1/Adam17/Dab2/Lrrk2/Trpv4/Sema6b/Wnt5a/Ifrd1/Pmp22/Epha4/Plxnb3/Pfn2/Ulk2/Sema6d/Cspg4/Cep97/Ptprs/Trak2/Xylt1/Apoe/Thy1/Efnb2/Cyth2/Hdac2/Sema6a/Adcy6/Efemp1/Prkcd/Sema3g/Lgals1/Ntn1/Cfl1/Odf2l/Dnm3/Lpar1/Tsc1/Dtnbp1/Cd38/Rgma/Sema3b/Akt1/Stmn2/Flna/Yap1/Slit2/Rtca/Epha7/Inppl1/Evl/Sema7a/Sema5a/Ulk1/Mdm2/Ptk2/Ywhah/Ttc3/Inpp5j/Tchp/Efna1/Fyn/Capzb/Carm1/Rap1gap2/…	92
GO:0050769	positive regulation of neurogenesis	0.0245586	0.367781	5.77742e-18	2.60359e-16	Ptprf/Baiap2/Fbxo31/Vcan/Eef2k/Vim/Kdr/Tnfrsf12a/Cux2/Nrp1/Jade2/Plxnd1/Serpinf1/Fn1/Twf2/Kalrn/Marcks/Cxcl12/Wnt5a/Flt1/Afdn/Caprin1/Mme/Bin1/Aspa/Epha4/Ngf/Plxnb3/Bdnf/Map1b/Plxnb1/Fgf2/Cdon/Wdr62/Rab21/Dixdc1/Picalm/Xrcc2/Vegfc/Apoe/Ace/Csf1r/Prpf19/Obsl1/Myc/Hdac2/Plxna1/Ntn1/Dhx36/Lyn/Reln/Atxn1/Smo/Trpv2/Plxnc1/Mecp2/Clcf1/Tnik/Numb/Zfyve27/Wls/Dlg4/Tgfb1/Golga2/Enpp2/Skil/Map2k1/Tiam2/Zeb2…	121
GO:0032386	regulation of intracellular transport	0.0253704	0.361272	8.61933e-18	3.8288e-16	Apod/Pik3r1/Lcp1/Reep1/Wnk1/Ifi27/Ehd2/Ptpn11/Dnajc27/Gas1/Dab2/Lrrk2/Inpp5k/Vps11/Anxa2/Xpo1/Akap8l/Pkia/Bmp4/Sh3tc2/Os9/Pgap1/Wipf1/Ttc21b/Bag3/Map1b/Kcnb1/Rab21/Zpr1/Tbc1d20/Cabp1/Septin8/Tamalin/Crebrf/Pdcd5/Ogt/Sar1a/Prkcd/Ehd1/Tnnt2/Use1/Ube2g2/Smo/Mecp2/Svip/Dennd10/Fbxw7/Nsun2/Pcnt/Tgfb1/Cep131/Epm2a/Oaz2/Sfn/Abca12/Tek/Tm9sf4/Cdc42/Flna/Map2k1/Ldlrap1/Uhmk1/Bves/Hspa1l/Tcaf1/Stom/Tcaf2/D…	125
GO:0051258	protein polymerization	0.02192	0.382979	1.20221e-17	5.26512e-16	Fam107a/Tuba1a/Baiap2/Arhgap18/Lmod3/Myadm/Tmsb4x/Tmsb10/Spta1/Mkks/Clasp1/Fkbp4/Twf2/Trpv4/Coro1a/Cdc42ep2/Eln/Bin1/Add3/Pfn2/Arhgap28/Tppp3/Cdc42ep4/Carmil1/Washc1/Casq1/Cav1/Map1b/Capn1/Cotl1/Nav3/Tppp/Lmod2/Nedd1/Msrb1/Vasp/Cenpj/Nck1/Gas7/Prkcd/Gda/Eps8/Cfl1/Kank3/Mecp2/Mtpn/Capza1/Clasp2/Tubgcp5/Ppp1r9a/Ptk2b/Tmod3/Casq2/Nckap1/Golga2/Stmn2/Slit2/Abitram/Fchsd2/Dctn1/Mlst8/Evl/Dbn1/Dyrk1a/N…	108
GO:0051962	positive regulation of nervous system development	0.027603	0.347826	1.28288e-17	5.54038e-16	Ptprf/Baiap2/Pik3r1/Thbs2/Fbxo31/Vcan/Eef2k/Vim/Kdr/Tnfrsf12a/Cux2/Nrp1/Jade2/Plxnd1/Serpinf1/Fn1/Twf2/Kalrn/Marcks/Cxcl12/Wnt5a/Flt1/Afdn/Caprin1/Mme/Bin1/Aspa/Epha4/Ngf/Plxnb3/Bdnf/Ephb1/Lrrc4b/Prkca/Map1b/Plxnb1/Fgf2/Cdon/Wdr62/Rab21/Dixdc1/Picalm/Xrcc2/Vegfc/Apoe/Ace/Csf1r/Prpf19/Adgrl2/Obsl1/Myc/Hdac2/Srpx2/Plxna1/Ntn1/Dhx36/Lyn/Reln/Atxn1/Smo/Trpv2/Plxnc1/Mecp2/Clcf1/Tnik/Numb/Zfyve27/Wls/D…	136
GO:0007044	cell-substrate junction assembly	0.01096	0.55102	1.36828e-17	5.82826e-16	Apod/Fam107a/Actg1/Kdr/Whamm/Nrp1/Dusp3/Gpm6b/Clasp1/Ptpn11/Ldb1/Fn1/Myh9/Ppm1f/Tns1/S100a10/Col16a1/Thy1/Coro2b/Mmp14/Sorbs1/Lamc1/Cfl1/Clasp2/Tsc1/Ston1/Bcl2/Ptk2b/Itgav/Cdh11/Dusp22/Itga5/Tek/Enpp2/Limch1/Lama3/Lims1/Ptpra/Ptk2/Thsd1/Ajuba/Phldb2/Macf1/Arhgap6/Coro1c/Dmtn/Pdpk1/Pxn/Smad3/Actn2/Iqgap1/Peak1/Vcl/Epb41l5	54
GO:1901873	regulation of post-translational protein modification	0.0225289	0.376271	1.95568e-17	8.21776e-16	Fam107a/Gata2/Dcun1d2/Wnk1/Herpud1/Sqstm1/Egr1/Sphk1/Crtap/Lrrk2/Dysf/Ngf/Ubb/Fgfr3/Xiap/Washc1/Cdk5rap3/Ube2n/Flcn/Nfya/Cav1/Rasd2/Nop53/Septin4/Gps2/Ehmt2/Ogt/Dnaja1/Cblb/Mecp2/Dnaja3/Suv39h1/Gnl3/Fbxw7/Rchy1/Tgfb1/Tcf25/Trib1/Smarca5/Epm2a/Trib2/Mcrs1/Akt1/Arrb2/Sae1/Daxx/Per2/Ubxn1/Arrdc3/Smad7/Angpt1/Ube2d1/Sprtn/Atg5/Kansl3/Prkn/Sirt1/Gtpbp4/Baz1b/Ndfip2/Gclc/Pdcd6/Limk1/Mad2l2/Ube2v2/Rnf40…	111
GO:0033002	muscle cell proliferation	0.0217171	0.382143	2.03852e-17	8.34044e-16	Cdkn1a/Apod/Ogn/Pik3r1/Apln/Igfbp3/Ddr2/Ccnd2/Selenon/Egr1/Hmox1/Gja1/Flt1/Dipk2a/Cxadr/Bmp4/Igfbp5/Nampt/Calcrl/Bmpr1a/Ephb1/Il6ra/Prkca/Comt/Kcnk2/Gata6/Cited2/Timp3/Nqo2/Tbx5/Cav1/Cflar/Fgf2/Nppb/Six5/Trp53/Apoe/Jarid2/Mmp2/Tgfbr2/Foxj2/Myc/Hdac2/Thbs1/Efemp2/Dnmt1/Sf1/Camk2d/Cav2/Snhg15/Tgfb1/Trib1/Il15/S1pr2/Igf1r/Akt1/Traf6/Zfp143/Yap1/Ldlrap1/Fgf9/Mapk11/Mef2c/Tgfb2/Tgfb3/Angpt1/Ndrg2/Mdm2…	107
GO:0048738	cardiac muscle tissue development	0.0217171	0.382143	2.03852e-17	8.34044e-16	Pi16/Myh7/Col14a1/Adrb1/Adamts9/Ppp1r13l/Ccnd2/Ankrd1/Xirp1/Gja1/Rgs4/Wnt5a/Nr3c1/Dipk2a/Aldh1a2/Gja5/Cxadr/Bmp4/Xirp2/Bmpr1a/Casp8/Actc1/Kcnk2/Kcnj11/Gata6/Cited2/Tbx5/Fgf2/Dll4/Hspg2/Jarid2/Creb1/Cacybp/Efnb2/Tgfbr2/Sox6/Hdac2/Sgcd/Chd7/Nrap/Ift20/Tnnt2/Camk2d/Lmna/Mrtfb/Tsc1/Csrp3/Akap6/Tgfb1/Heg1/Lrrc10/Lrrc27/Zmpste24/Dll1/Slc25a4/Irx3/Arrb2/Cdc42/Yap1/Rarb/Fgf9/Mapk11/Bves/Mef2c/Trip10/Tgfb…	107
GO:0150115	cell-substrate junction organization	0.0113659	0.533333	2.56117e-17	1.03427e-15	Apod/Fam107a/Pik3r1/Actg1/Kdr/Whamm/Nrp1/Dusp3/Gpm6b/Clasp1/Ptpn11/Ldb1/Fn1/Myh9/Ppm1f/Tns1/S100a10/Col16a1/Thy1/Coro2b/Mmp14/Sorbs1/Lamc1/Cfl1/Clasp2/Tsc1/Ston1/Bcl2/Ptk2b/Itgav/Cdh11/Dusp22/Itga5/Tek/Enpp2/Limch1/Lama3/Lims1/Ptpra/Ptk2/Thsd1/Ajuba/Rab8b/Phldb2/Macf1/Arhgap6/Coro1c/Dmtn/Pdpk1/Pxn/Smad3/Actn2/Iqgap1/Peak1/Vcl/Epb41l5	56
GO:0051056	regulation of small GTPase mediated signal transduction	0.0188756	0.404348	3.6312e-17	1.44758e-15	Col3a1/Arhgap18/Bcl6/Nrp1/Psd3/Itpkb/Adgrg1/Synpo2l/Abra/Ralgapa1/Ngf/Amot/Spry4/Cyth4/Syde2/Arhgdib/Arhgap28/Tnfaip1/Flcn/Cdon/Sipa1/Bnip2/Apoe/Lpar6/Cyth2/Chn1/Ogt/Cd2ap/Eps8/Csf1/Reln/Lpar1/Abca1/Eps8l1/Camk2d/Itgav/Plce1/Heg1/Ssx2ip/Ripor2/Scai/Map2k1/Slit2/Stard13/Arfgef2/Gpr17/Adcyap1r1/Tgfb2/Cyth1/Gpr4/Dennd4b/Tns3/Mapkap1/Rapgef1/Arfgef1/Arhgap12/Dennd1a/Timp2/Iqsec3/Kbtbd7/Git1/Igf1/Erbb…	93
GO:0051348	negative regulation of transferase activity	0.0204993	0.388462	4.33383e-17	1.70581e-15	Cdkn1a/Actb/Ddr2/Wnk1/Chordc1/Dusp3/Errfi1/Ptprc/Inpp5k/Adarb1/Midn/Pkia/Ppm1f/Ggnbp2/Spry4/Adora2a/Socs5/Prkca/Irak3/Washc1/Dusp1/Cdk5rap3/Cav1/Tigar/Trp53/Apoe/Csk/Thy1/Aida/Zfp36/Casp3/Tfap4/Dnaja1/Fbxo7/Prkcd/Pik3ip1/Irs2/Cblb/Lyn/Fem1a/Dnaja3/Setd7/Sfrp1/Camk2n1/Dtnbp1/Prpsap1/Dusp10/Chmp6/Trib1/Xrcc1/Fabp4/Heg1/Dusp22/Nppa/Mcrs1/Akt1/Spred1/Uchl1/Daxx/Cdk5rap1/Rubcn/Inppl1/Adar/Smad7/Cox11/…	101
GO:0061136	regulation of proteasomal protein catabolic process	0.016846	0.425641	4.72903e-17	1.8381e-15	Clu/Herpud1/Rnf144b/Ddrgk1/Dab2/Lrrk2/Arih2/Sco1/Nub1/Xpo1/Rnf144a/Csnk1e/Ubb/Socs5/Cav1/Nudt15/Nop53/Apoe/Ogt/Rnf19b/Bbs7/Uchl5/Tmtc3/Svip/Desi1/Fbxw7/Rchy1/Rhbdf1/Trib1/Plk2/Dda1/Gabarapl2/Epm2a/Glmn/Trib2/Akt1/Sgta/Ubxn1/Psmf1/Mdm2/Sirt2/Bag6/Prkn/Eif3h/Ecscr/Gclc/Clec16a/Usp9x/Ube2v2/Rnf40/Pias1/Psmd10/Sh3rf1/Pithd1/Bag5/Sumo2/Il33/Mapk9/Gabarap/Chfr/Klhl40/Usp14/Mapk8/Zyg11b/Tmem259/Tlk2/Ubq…	83
GO:0016236	macroautophagy	0.0209052	0.384328	5.07922e-17	1.94984e-15	Sesn1/Trp53inp1/Retreg1/Bnip3/Atg101/Kdr/Tom1/Sesn3/Sqstm1/Atg13/Hmox1/Ddrgk1/Lrrk2/Gabarapl1/Map1lc3b/Vps16/Vamp8/Qsox1/Irgm1/Tbc1d5/Ulk2/Rab7/Pacs2/Bag3/Tigar/Trp53inp2/Trp53/Optn/Tmem41b/Wdr45/Supt5/Calr/Ehmt2/Uvrag/Synpo2/Usp30/Mfsd8/Atg4c/Ogt/Sptlc2/Pik3c2b/Ift20/Gpsm1/Aup1/Tsc1/Rnf31/Atm/Tcirg1/Tgfb1/Chmp6/Map1lc3a/Gabarapl2/Epm2a/Lrba/Slc25a4/Traf6/Trim13/C9orf72/Rubcn/Stk3/Ubxn6/Nrbp2/Sco…	103
GO:0051402	neuron apoptotic process	0.0261823	0.349593	5.51031e-17	2.08953e-15	Nes/Mt1/Ptprf/Bcl2l1/Lcn2/Tuba1a/Egln3/Retreg1/Hsph1/Prodh/Ccnd1/Itga1/Bnip3/Unc5b/Clu/Kdr/Tmtc4/Nrp1/Plxnd1/Lgmn/Egr1/Hmox1/Siah1a/Nr3c1/Adarb1/Zfp110/Nqo1/Coro1a/Fas/Ngf/Adora2a/Hspd1/Bdnf/Ubb/Fgfr3/Casp8/Xiap/Atf4/Nqo2/Sod1/Hyou1/Kcnb1/Trp53/Optn/Xrcc2/Zpr1/Apoe/Gclm/Kcnip3/Cntfr/Casp3/Mcl1/Fbxo7/Casp6/Agap2/Grik5/Smo/Mecp2/Parp1/Clcf1/Fbxw7/Thrb/Bok/Bcl2/Atm/Tgfb1/Ptk2b/Tnfrsf21/Arrb2/Cdc42/E…	129
GO:0006417	regulation of translation	0.0286178	0.337321	6.48449e-17	2.42932e-15	Tent5b/Cirbp/Eif4ebp1/Cyp1b1/Ppp1r15a/Rbm3/Mknk2/Eef2k/Vim/Limd1/Ncbp2/Mettl16/Taco1/Tnrc6a/Caprin1/Rmnd1/Igfbp5/Per1/Ptcd3/Eif1/Prkca/Dap/Tsfm/Mpv17l2/Ago4/Tob1/Dcp2/Calr/Eif4e/Niban1/Pcif1/Zfp36/Ngdn/Pan2/Rida/Eif3b/Ogt/Nck1/Pnpt1/Thbs1/Lrpprc/Dhx36/Eprs1/Ifrd2/Trim3/Exosc5/Tsc1/Nsun4/Ogfod1/Akap6/Ptk2b/Malsu1/Cdk4/Pum3/Ybx2/Eif2b5/Akt1/Per2/Uhmk1/Cdk5rap1/Coa3/Eif6/Sh3bgrl/Nck2/Khdrbs1/Cpeb1/M…	141
GO:1903050	regulation of proteolysis involved in protein catabolic process	0.0188756	0.400862	7.05418e-17	2.61128e-15	Clu/Herpud1/Rnf144b/Ctsc/Ddrgk1/Dab2/Lrrk2/Arih2/Sco1/Nub1/Xpo1/Rnf144a/Epha4/Csnk1e/Ubb/Socs5/Tgfb1i1/Cav1/Nudt15/Nop53/Apoe/Ogt/Rnf19b/Tmem168/Bbs7/Uchl5/Tmtc3/Svip/Desi1/Fbxw7/Rchy1/Rhbdf1/Trib1/Ptk2b/Plk2/Dda1/Gabarapl2/Epm2a/Glmn/Trib2/Akt1/Sgta/Ubxn1/Psmf1/Mdm2/Anks1/Ptk2/Sirt2/Bag6/Prkn/Eif3h/Ecscr/Gclc/Clec16a/Usp9x/Ube2v2/Rnf40/Pias1/Psmd10/Efna1/Sh3rf1/Pithd1/Bag5/Sumo2/Il33/Mapk9/Gabar…	93
GO:0009101	glycoprotein biosynthetic process	0.02192	0.373702	9.31617e-17	3.40805e-15	Galnt15/St8sia4/Gal3st2c/Tmtc2/B3galnt2/Pmm1/Mgat5/Tmtc1/Tmtc4/Gxylt2/Poglut3/Tet1/Itm2a/Alg9/Magt1/Gfpt1/Galnt11/Fktn/Pomk/Pomt1/Dpy19l1/Mgat3/Alg14/Pxylp1/Uggt2/Ext1/Acer2/Dse/Xxylt1/Trak2/Galnt7/Xylt1/Fut8/St6gal1/Mogs/C1galt1c1/Galnt10/Dpm1/Entpd5/Ogt/Abca7/Itm2b/St6galnac4/Tmem106a/Mustn1/Bace2/Insr/Tmtc3/Poglut2/Chst7/B3galt6/Hs3st5/Trip11/Ostc/Bcl2/Il15/Ndst2/Golga2/Alg2/Gcnt2/Galnt4/Chpf2…	108
GO:0048041	focal adhesion assembly	0.0099452	0.563218	1.27837e-16	4.62218e-15	Apod/Fam107a/Actg1/Kdr/Whamm/Nrp1/Dusp3/Gpm6b/Clasp1/Ptpn11/Ldb1/Myh9/Ppm1f/S100a10/Col16a1/Thy1/Coro2b/Mmp14/Sorbs1/Cfl1/Clasp2/Tsc1/Ston1/Bcl2/Ptk2b/Itgav/Cdh11/Dusp22/Tek/Enpp2/Limch1/Lims1/Ptpra/Ptk2/Thsd1/Ajuba/Phldb2/Macf1/Arhgap6/Coro1c/Dmtn/Pdpk1/Pxn/Smad3/Actn2/Iqgap1/Peak1/Vcl/Epb41l5	49
GO:0003012	muscle system process	0.0298356	0.329596	1.38838e-16	4.96224e-15	Pi16/Myh7/Ccn2/Tpm4/Ptgs1/Lmod3/Col14a1/Adrb1/Trim63/Snta1/Acta2/Myh14/Ppp1r13l/Selenon/Myom2/Mkks/Klf15/Errfi1/Tmem38b/Sphk1/Tnni2/Zfas1/Trpv4/Rgs4/Scn4b/Flt1/Nr3c1/Pde4b/Cacnb2/Trpc3/Synm/Foxo3/Bin1/Gja5/Dsc2/Bmp4/Igfbp5/Clcn1/Gatm/Sulf1/Calcrl/Prkca/Cacna1s/Actc1/Mir208b/Apbb2/Gata6/Casq1/Cav1/Cflar/Sod1/Nppb/Lmod2/Jarid2/P2ry1/Map2k6/Ece1/Smtn/Kcnh2/Gtf2ird2/Myoz2/Sgcd/Fbxo32/Ank2/Kcnd2/Tnnt2…	147
GO:0061572	actin filament bundle organization	0.0156282	0.435028	1.43795e-16	5.08099e-15	Fam107a/Baiap2/Ccn2/Fscn1/Pik3r1/Lcp1/Actg1/Arap1/Nrp1/Mkks/Myo1b/Rflnb/Clasp1/Ppfia1/Marcks/Inpp5k/Myh9/Ppm1f/Pls3/Asap3/Synpo2l/Eln/Arhgef15/S100a10/Pfn2/Arhgap28/Carmil1/Tnfaip1/Rgcc/Sorbs3/Rhoc/Synpo2/Wnt11/Coro2b/Sorbs1/Gas7/Eps8/Cfl1/Kank3/Lpar1/Clasp2/Tsc1/Ppp1r9a/Swap70/Ptk2b/Itgb5/Wasf2/Cdc42/Flna/Zeb2/Limch1/Evl/Dbn1/Tgfb3/Rapgef3/Myh10/Prkn/Cald1/Limk1/Phldb2/Cx3cl1/Arhgap6/Stmn1/Dmtn/…	77
GO:0046777	protein autophosphorylation	0.0190785	0.394958	1.50118e-16	5.2448e-15	Mknk2/Ddr2/Wnk1/Pim3/Eef2k/Kdr/Errfi1/Ptprc/Lrrk2/Flt1/Epha4/Ngf/Stk16/Fgfr3/Ephb1/Prkca/Ulk2/Irak3/Phka1/Cav1/Rap2a/Vegfc/Vrk1/Ace/Csf1r/Csk/Thy1/Grk5/Mapkapk3/Gpnmb/Wnk2/Taok3/Prkcd/Lyn/Insr/Camk2d/Cad/Smg1/Tnik/Atm/Ptk2b/Igf1r/Tek/Prlr/Nlk/Uhmk1/Epha7/Dyrk1a/Rap2b/Ulk1/Ptk2/Rap2c/Ripk3/Tnks1bp1/Obscn/Csnk2a1/Dyrk1b/Fyn/Erbb2/Taok1/Mark3/Impact/Stk11/Tom1l1/Pink1/Camk2a/Mapk14/Pim1/Clk4/Camkk2/…	94
GO:0006979	response to oxidative stress	0.0267912	0.339332	3.70372e-16	1.27962e-14	Apod/Lcn2/Sesn1/Cyp1b1/Trp53inp1/Ptgs1/Pxdn/Mgst1/Ddr2/Bnip3/Selenon/Sesn3/Sqstm1/Sphk1/Hmox1/Ptprn/Lrrk2/Foxo3/Bmal1/Nqo1/Mmp3/Bmp4/Cygb/1600014C10Rik/Alox5/Prkca/Ermp1/Ppif/Sirpa/Mgat3/Pla2r1/Atf4/Nudt15/Capn1/Ercc6l2/Sod1/Ercc1/Mpv17l2/Trp53/Gpx3/Fut8/Apoe/Gpx8/Gclm/Mmp2/Prdx1/Psip1/Casp3/Hdac2/Pnpt1/Aqp1/Prkcd/Casp6/Cfl1/Rbpms/Parp1/Gja3/Tsc1/Sod3/Cd38/Chuk/Bcl2/Atm/Gsr/Ptk2b/Xrcc1/Akt1/Map2k…	132
GO:0045732	positive regulation of protein catabolic process	0.0172519	0.408654	3.83695e-16	1.31109e-14	Mylip/Clu/Herpud1/Rnf144b/Ddrgk1/Gja1/Dab2/Lrrk2/Arih2/Wnt5a/Vps11/Nub1/Sox17/Rnf144a/Csnk1e/Sh3d19/Ppp2r3a/Socs5/Rab7/Cav1/Nop53/Apoe/Crebrf/Cul4b/Rnf19b/Bbs7/Cblb/Asb11/Tmtc3/Fbxw7/Rchy1/Rgma/Trib1/Plk2/Dda1/Oaz2/Apc2/Trib2/Akt1/Sgta/Egln2/Asb5/Rhbdd1/Pacsin3/Mdm2/Snx9/Lpcat1/Vgll4/Sirt2/Bag6/Prkn/Ecscr/Gclc/Dact1/Ube2v2/Rnf40/Pias1/Psmd10/Sh3rf1/Rilp/Sumo2/Il33/Ldlr/Mapk9/Gabarap/Tnfaip3/Chfr/…	85
GO:0030111	regulation of Wnt signaling pathway	0.0233408	0.356037	5.95588e-16	2.01301e-14	Col1a1/Wnk1/Limd1/Lmbr1l/Klf15/Egr1/Dab2/Lgr6/Lrrk2/Pbxip1/Wnt5a/Hic1/Foxo3/Bmal1/Sox17/Csnk1e/Ppp2r3a/Grb10/Sulf1/Fgfr3/Tmem132a/Ift80/Lzts2/Xiap/Ttc21b/Cmah/Trabd2b/Cav1/Tmem64/Fgf2/Dixdc1/Apoe/Dact3/Wnt11/Wnk2/Tle2/Hdac2/Plpp3/Invs/Ift20/Crbn/Sox7/Lzic/Sfrp1/Usp34/G3bp1/Wls/Fam53b/Tgfb1/Apc2/Nppa/Nlk/Zranb1/Yap1/Zeb2/Fgf9/Ptpru/Ruvbl2/Otulin/Stk3/Sema5a/Snai2/Bambi/Tnks2/Alpk2/Vgll4/Prkn/Rapge…	115
GO:0016358	dendrite development	0.0235437	0.35474	6.04769e-16	2.02206e-14	Ptprf/Baiap2/Fbxo31/Rtn4ip1/Matn2/Eef2k/Fstl4/Cux2/Nrp1/Kalrn/Lrrk2/Marcks/Wnt5a/Nr3c1/Afdn/Tet1/Caprin1/Hecw2/Epha4/Fas/Bdnf/Dclk1/Adam10/Ephb1/Map1b/Uba6/Ptprs/Rab21/Picalm/Rap2a/Trak2/Apoe/Cyth2/Obsl1/Hdac2/Rapgef4/Ntn1/Dhx36/Cfl1/Reln/Dnm3/Lpar1/Mecp2/Abi2/Dtnbp1/Tnik/Numb/Wls/Ppp1r9a/Rere/Dlg4/Plk2/Slc9a6/Cdc42/Sdc2/Palm/Abitram/Mef2c/Dbn1/Nck2/Opa1/Abi3bp/Crkl/Itsn1/Ywhah/Dact1/Nsmf/Prex1/P…	116
GO:0051017	actin filament bundle assembly	0.0152222	0.431034	6.54379e-16	2.16465e-14	Fam107a/Baiap2/Ccn2/Fscn1/Pik3r1/Lcp1/Actg1/Arap1/Nrp1/Mkks/Myo1b/Clasp1/Ppfia1/Marcks/Inpp5k/Myh9/Ppm1f/Pls3/Asap3/Synpo2l/Eln/Arhgef15/S100a10/Pfn2/Arhgap28/Carmil1/Tnfaip1/Rgcc/Sorbs3/Rhoc/Synpo2/Wnt11/Coro2b/Sorbs1/Gas7/Eps8/Cfl1/Kank3/Lpar1/Clasp2/Tsc1/Ppp1r9a/Swap70/Ptk2b/Itgb5/Wasf2/Cdc42/Flna/Zeb2/Limch1/Evl/Dbn1/Tgfb3/Rapgef3/Myh10/Prkn/Cald1/Limk1/Phldb2/Cx3cl1/Arhgap6/Stmn1/Dmtn/Pxn/Sm…	75
GO:0032271	regulation of protein polymerization	0.0170489	0.407767	6.64882e-16	2.17624e-14	Baiap2/Arhgap18/Lmod3/Myadm/Tmsb4x/Tmsb10/Spta1/Mkks/Fkbp4/Twf2/Coro1a/Cdc42ep2/Eln/Bin1/Add3/Pfn2/Arhgap28/Tppp3/Cdc42ep4/Carmil1/Washc1/Cav1/Map1b/Capn1/Cotl1/Nav3/Tppp/Lmod2/Vasp/Nck1/Prkcd/Gda/Eps8/Cfl1/Kank3/Mecp2/Mtpn/Capza1/Clasp2/Ppp1r9a/Ptk2b/Tmod3/Nckap1/Stmn2/Slit2/Abitram/Fchsd2/Dctn1/Mlst8/Evl/Dbn1/Dyrk1a/Nck2/Cdc42ep3/Snx9/Cav3/Arfgef1/Hip1r/Tmod4/Inpp5j/Prex1/Grb2/Pfn4/Git1/Capzb/M…	84
GO:0043434	response to peptide hormone	0.0269941	0.335859	7.26113e-16	2.35191e-14	Col3a1/Ptprf/Serpina3n/Cdo1/Pik3r1/Eif4ebp1/Hdac9/Aldob/Ahsg/Klf15/Sesn3/Stxbp4/Ptpn11/Egr1/Marcks/Trpv4/Srsf5/Inpp5k/Sco1/Grb14/Stat2/Gatm/Grb10/Socs3/Prkca/Cry2/Cav1/Appl1/Capn1/Adrm1/Osbpl8/Khk/Plcd1/Tns2/Slc2a8/Creb1/Cacybp/Csk/Sorbs1/Ghr/Ogt/Nck1/Adcy6/Prkcd/Tbc1d4/Eif2b3/Irs2/Cfl1/Eprs1/Lpl/Insr/Cav2/Nr3c2/Parp1/Cad/Tsc1/Chuk/Pde3b/Csrp3/Ankrd26/Igf1r/Eif2b5/Akt1/Gpam/Snx5/Map2k1/Pdk2/Jak1/…	133
GO:0033673	negative regulation of kinase activity	0.0180637	0.395556	8.52891e-16	2.73406e-14	Cdkn1a/Actb/Ddr2/Wnk1/Chordc1/Dusp3/Errfi1/Ptprc/Inpp5k/Adarb1/Midn/Pkia/Ppm1f/Ggnbp2/Spry4/Adora2a/Socs5/Prkca/Irak3/Washc1/Dusp1/Cdk5rap3/Cav1/Tigar/Apoe/Csk/Thy1/Aida/Casp3/Tfap4/Dnaja1/Fbxo7/Prkcd/Pik3ip1/Irs2/Cblb/Lyn/Fem1a/Dnaja3/Sfrp1/Camk2n1/Dtnbp1/Prpsap1/Dusp10/Chmp6/Trib1/Fabp4/Heg1/Dusp22/Nppa/Akt1/Spred1/Uchl1/Daxx/Cdk5rap1/Rubcn/Inppl1/Adar/Cox11/Gadd45b/Cav3/Prkn/Sirt1/Ajuba/Agt/Pt…	89
GO:0051098	regulation of binding	0.0274	0.333333	8.73853e-16	2.77268e-14	Cdkn1a/Nes/Ptprf/Lox/Actb/Spta1/Plxnd1/Xirp1/Hmox1/Ddrgk1/Dab2/Lrrk2/Pbxip1/Wnt5a/Anxa2/Dysf/Map1lc3b/Bmp4/Epha4/Ngf/S100a10/Ramp2/Bdnf/Fktn/Hipk1/Arhgap28/Tmem132a/Cav1/Sympk/Cdon/Tmc8/Apoe/Ace/P2ry1/Larp7/Med25/Myc/Hdac2/Mfng/Tfap4/Cblb/Gpsm1/Smo/Mecp2/Parp1/Rest/Dtnbp1/Plscr1/Fbxw7/Rgma/Tgfb1/Plk2/Ybx2/Zmpste24/Lfng/Ripor2/Akt1/Golga2/Arrb2/Traf6/Cycs/Ppp1r2/Cdc42/Ldlrap1/Wfikkn2/Ttbk2/Per2/C9…	135
GO:0045926	negative regulation of growth	0.0200934	0.376426	1.01001e-15	3.17233e-14	Cdkn1a/Pi16/Sesn1/Cirbp/Adrb1/Sema3c/Mndal/Fstl4/Bcl6/Nrp1/Lgmn/Ahsg/Tspyl2/Gas1/Gja1/Dab2/Sema6b/Rgs4/Wnt5a/Sox17/Cxadr/Ifrd1/Igfbp5/Fgfr3/Ulk2/Kcnk2/Sema6d/Adipor2/Cited2/Tbx5/Cth/Nppb/Ptprs/Slit3/Fhl1/Trp53/Jarid2/Dact3/Wnt11/Tgfbr2/Hdac2/Sema6a/Pnpt1/Sema3g/Ntn1/Cfl1/Mecp2/Sfrp1/Bcl2/Rgma/Ankrd26/Sema3b/Tgfb1/Dusp10/Nppa/Crlf3/Slit2/Mapk11/Epha7/Sphk2/Cdkn2d/Stk3/Tgfb2/Osgin1/Sema7a/Sema5a/So…	99
GO:0009991	response to extracellular stimulus	0.0300386	0.321739	1.11626e-15	3.46976e-14	Cdkn1a/Fam107a/Itga6/Tfrc/Sesn1/Postn/Eif4ebp1/Glul/Ahcy/Chka/Adrb1/Alpl/Bche/Alb/Mkks/Vcam1/Sesn3/Plin3/Ptprc/Lrrk2/Trpv4/Fbn1/Gabarapl1/Tnrc6a/Slc22a3/Foxo3/Map1lc3b/Dsc2/Rnf152/Fas/Bmp6/Ahcyl/Gatm/Oma1/Tbc1d5/Comt/Ulk2/Dap/Flcn/Gpr155/Atf4/Tmem126b/Sod1/Nppb/Kcnb1/Sipa1/Cfh/Asl/Trp53/Castor1/Dpyd/Apoe/Wdr45/Ehmt2/Gsdmd/Hlcs/Zfp36/Ghr/Bmf/Ogt/Pik3c2b/Rragc/Lpl/Insr/Suv39h1/Cad/Tsc1/Scd4/Bcl2/Wd…	148
GO:0010977	negative regulation of neuron projection development	0.0146134	0.436364	1.12703e-15	3.46976e-14	Mylip/Sema3c/Fstl4/Vim/Nrp1/Adam17/Dab2/Lrrk2/Trpv4/Sema6b/Wnt5a/Ifrd1/Pmp22/Epha4/Ulk2/Sema6d/Cspg4/Ptprs/Trak2/Xylt1/Apoe/Thy1/Efnb2/Cyth2/Hdac2/Sema6a/Adcy6/Efemp1/Sema3g/Lgals1/Ntn1/Dnm3/Lpar1/Tsc1/Dtnbp1/Cd38/Rgma/Sema3b/Stmn2/Flna/Slit2/Rtca/Epha7/Inppl1/Sema7a/Sema5a/Ulk1/Mdm2/Ptk2/Ttc3/Inpp5j/Efna1/Carm1/Rap1gap2/Bag5/Cers2/Dguok/Lrp4/Dpysl3/Katna1/Rtn4rl1/Sema6c/Sema4a/Ptpn9/Rhoa/Sema3a/…	72
GO:0043523	regulation of neuron apoptotic process	0.0225289	0.358065	1.20366e-15	3.66937e-14	Nes/Mt1/Ptprf/Bcl2l1/Lcn2/Egln3/Retreg1/Hsph1/Prodh/Ccnd1/Itga1/Unc5b/Clu/Kdr/Nrp1/Plxnd1/Lgmn/Egr1/Hmox1/Nr3c1/Nqo1/Coro1a/Fas/Ngf/Adora2a/Hspd1/Bdnf/Ubb/Fgfr3/Casp8/Xiap/Atf4/Nqo2/Sod1/Hyou1/Kcnb1/Trp53/Optn/Xrcc2/Zpr1/Apoe/Gclm/Kcnip3/Cntfr/Casp3/Mcl1/Fbxo7/Casp6/Agap2/Grik5/Smo/Mecp2/Parp1/Clcf1/Fbxw7/Bok/Bcl2/Atm/Ptk2b/Arrb2/Cdc42/Egln2/Lig4/Epha7/Mef2c/Tgfb2/Tgfb3/Angpt1/Nrbp2/Pcdhgc3/Itsn1…	111
GO:0005996	monosaccharide metabolic process	0.0213111	0.365854	1.33103e-15	3.99871e-14	Apod/Rorc/Gnmt/Pik3r1/Igfbp3/Aldob/Pmm1/Galm/Rpia/Fabp5/Gpd1/Fbn1/Crtc2/Nr3c1/Midn/Pfkl/Slc25a13/Dcxr/Oma1/Kcnj11/Atf4/C1qtnf2/Man2a2/Dse/Tigar/Khk/Trp53/Nudt5/Slc2a8/Gpt2/B3glct/Sorbs1/Myc/Ogt/Irs2/Slc35b4/Got1/Pgm2l1/Insr/Slc45a3/Glb1/Gnb3/Esrrb/Rora/Fuca1/Zmpste24/Pgam1/Akt1/Pdk2/Per2/Galt/Kbtbd2/Oas1b/Inppl1/Slc25a12/Dgat2/Arsb/Hexb/Soga1/Dsel/Cox11/Eno3/Prkn/Sirt1/Gclc/Pofut1/Fkrp/Ids/Gpd2/S…	105
GO:0022613	ribonucleoprotein complex biogenesis	0.0290237	0.325	1.33741e-15	3.99871e-14	Glul/Mettl16/Xpo1/Sbds/Sart1/Las1l/Eri1/Riok3/Trmt2b/LTO1/Rps27rt/Mpv17l2/Ago4/Nop53/Snrpd1/Prpf19/Tfb1m/Psip1/Ngdn/Rpp25/Cul4b/Ptbp2/Wdr43/Chd7/Scaf11/Zfp622/Gtpbp10/Suv39h1/Exosc5/Ddx56/Fau/Riox2/Gnl2/Tsc1/Nsun4/Khdc4/Ipo4/Atm/Malsu1/Sf3a2/Prpf6/Nop14/Lsm6/Utp3/Nom1/Denr/Ruvbl2/Ltv1/Eif6/Cpsf7/Adar/Rrs1/Dkc1/Abt1/Mrps2/Nat10/Npm3/Srsf6/Xab2/Ddx17/Snrpf/Dimt1/Tsr3/Srpk1/Gtpbp4/Lsg1/Pop7/Nvl/Ddx2…	143
GO:0007162	negative regulation of cell adhesion	0.0227319	0.355556	1.58734e-15	4.70075e-14	Apod/H2-Aa/Fam107a/Col1a1/Postn/Cd74/Pik3r1/Cyp1b1/Myadm/Wnk1/Bcl6/Twsg1/Plxnd1/Jam2/Dusp3/Il4ra/Ptpn11/Fbln1/Ptprc/Trpv4/Cxcl12/Jam3/Ppm1f/Bmp4/Epha4/Plxnb3/Spry4/Adora2a/Bmp6/Lamb1/Adam10/Socs5/Il20rb/Ass1/Dusp1/Pla2g5/Rgcc/Plxnb1/Acer2/Hspg2/Mmp2/Gpnmb/Coro2b/Mmp14/Casp3/Sema6a/Thbs1/Prkcd/Plxna1/Lgals1/Cd276/Cblb/Cfl1/Plxnc1/Clasp2/Pde5a/Pde3b/Tgfb1/Swap70/Glmn/Dusp22/Ripor2/Tnfrsf21/Abca12/A…	112
GO:0031098	stress-activated protein kinase signaling cascade	0.0198904	0.375479	1.70051e-15	4.98839e-14	Ccn2/Xdh/Fgd4/Dusp3/Errfi1/Sphk1/Dab2/Lrrk2/Trpv4/Wnt5a/Zfp110/Bmp4/Fas/Eda2r/Per1/Fktn/Fgfr3/Ephb1/Ccr2/Sirpa/Dusp1/Dixdc1/Rap2a/Gps2/Map2k6/Prdx1/Aida/Zfp36/Klhl31/Dnaja1/Taok3/Lyn/Zfp622/Sfrp1/Tnik/Dusp10/Trib1/Ptk2b/Tlr3/Map2k3/Igf1r/Zmpste24/Dusp22/Nppa/Map4k2/Akt1/Traf6/Cdc42/Map2k1/Daxx/Mapk11/Lmnb1/Stk3/Tgfb2/Ptk2/Prmt1/Ltbr/Gadd45b/Cav3/Rapgef1/Dact1/Agt/Tnfrsf19/Dusp16/Kcnj8/Sh3rf1/Mtur…	98
GO:0032259	methylation	0.0207023	0.368231	2.05758e-15	5.97944e-14	Gnmt/H1f2/Inmt/Etfbkmt/Trmt1l/Mtr/Prmt2/Mettl16/Tet1/Slc25a26/Rlf/Ndufaf5/Comt/Trmt2b/Kmt2b/Hsd17b10/N6amt1/Hemk1/Eef1akmt1/Wdr6/Ehmt2/Mto1/Tfb1m/Pcif1/As3mt/Larp7/Ezh1/Ogt/Trmt1/Rsl1/Trmt12/Dnmt1/Atpsckmt/Rbbp5/Mecp2/Setd7/Parp1/Suv39h1/Hnmt/Nsun4/Tyw3/Nsun2/Dnmt3a/Smarca5/Nsd2/Setd1b/Zmpste24/Prmt9/Mcrs1/Akt1/Coq3/Prdm16/Setd1a/Mettl3/Rab3d/Kansl3/Dimt1/Prmt1/Smyd4/Mtrr/Smyd5/H19/Carm1/Emg1/Mrm…	102
GO:0030522	intracellular receptor signaling pathway	0.0233408	0.35061	2.11354e-15	6.08518e-14	Irf7/Heyl/Akr1c14/Ddx60/Fabp5/Prcp/Ddrgk1/Gbp2/Fkbp4/Dab2/Prmt2/Flt1/Nr3c1/Vps11/Klf9/Bmal1/Aldh1a2/Tspan6/Cyp26b1/Per1/Bdnf/Kdm3a/Colec12/Tnip2/Irgm1/Nfkbia/Riok3/Cry2/Cited2/Cav1/Lacc1/Ptprs/Plcg2/Nop53/Gps2/Calr/Tcf21/Calcoco1/Unc93b1/Stard10/Dnaja1/Nploc4/Wbp2/Trim3/Nr3c2/Parp1/Sfrp1/Trerf1/Thrb/Alpk1/Rftn1/Tlr3/Esrrb/Rora/Slc15a3/Asxl1/Traf6/Atat1/Yap1/Daxx/Rarb/Otulin/Safb/Oas1b/Ptgis/Snai2…	115
GO:0009117	nucleotide metabolic process	0.0316623	0.313883	2.14346e-15	6.11472e-14	Fmo2/Bcl2l1/Myh7/Nnt/Xdh/Dcakd/Ak4/Aldh1l1/Aldob/Hsd11b1/Rpia/Pde4a/Adcy7/Nos2/Ces1d/Lrrk2/Gpd1/Hmgcs2/Nudt12/Acaca/Aldh1l2/Nqo1/Adcy1/Dut/Uprt/Nudt16/Nudt4/Nt5c1a/Acsl5/Nampt/Slc25a13/Dcxr/Flcn/Cyb5r4/Mmut/Nudt15/Nppb/Prps2/Lacc1/Tigar/Cfh/Nt5e/Trp53/Nudt5/Far1/Atp6v1a/Dpyd/Ak3/Myc/Pank1/Dck/Entpd5/Adcy6/Entpd1/Gda/Nmrk2/Gpd1l/Atpsckmt/Rpe/Parp1/Cad/Hmgcs1/Pde5a/Prpsap1/Adal/Hsd17b4/Pfas/Adcy4/T…	156
GO:0050678	regulation of epithelial cell proliferation	0.0282119	0.326291	2.33016e-15	6.58688e-14	Xdh/Glul/Apln/Sparc/Ccnd1/Gata2/Kdr/Ift122/Ccnd2/Adam17/Ctsl/Atoh8/Stxbp4/Errfi1/Serpinf1/Gas1/Lrg1/Hmox1/Gja1/Ptprn/Dab2/Zfas1/Cxcl12/Wnt5a/Flt1/Klf9/Vash1/Aldh1a2/Dysf/Htra1/Cxadr/Bmp4/Plxnb3/Bmp6/Intu/Sulf1/Alox5/Fgfr3/Bmpr1a/Prkca/Ift80/Flcn/Cav1/Rgcc/Cflar/Fgf2/Nppb/Dll4/Col18a1/Synj2bp/Hspg2/Vegfc/Apoe/Nr1d1/Aggf1/Efnb2/Zfp36/Myc/Rida/Thbs1/Plau/Agap2/Irs2/Smo/Cav2/Sfrp1/Hmgn1/Slc39a9/Fgf18…	139
GO:0031331	positive regulation of cellular catabolic process	0.0243556	0.34384	2.70742e-15	7.58436e-14	Sesn1/Trp53inp1/Nnt/Igfbp3/Bnip3/Atg101/Kdr/Tom1/Sesn3/Sqstm1/Pnpla2/Atg13/Hmox1/Lrrk2/Gpd1/Mettl16/Tnrc6a/Caprin1/Foxo3/Rnf152/Sh3d19/Acsl5/Irgm1/Ulk2/Flcn/Bag3/Supv3l1/Optn/Tob1/Apoe/Wdr45/Dcp2/Supt5/Usp20/Zfp36/Pan2/Myc/Rida/Pnpt1/Fbxo7/Prkcd/Irs2/Dhx36/Sptlc2/Gpsm1/Smo/Insr/Exosc5/Tsc1/Svip/Rnf31/Atm/Rgma/Plk2/Epm2a/Esrrb/Trim65/Slc25a4/Map2k1/Zbtb20/Trim13/C9orf72/Pacsin3/Mlst8/Mtln/Mettl3/S…	120
GO:0031667	response to nutrient levels	0.0282119	0.325527	2.8807e-15	7.99773e-14	Cdkn1a/Fam107a/Sesn1/Postn/Eif4ebp1/Glul/Ahcy/Chka/Adrb1/Alpl/Bche/Alb/Mkks/Sesn3/Plin3/Lrrk2/Trpv4/Fbn1/Gabarapl1/Tnrc6a/Slc22a3/Foxo3/Map1lc3b/Dsc2/Rnf152/Fas/Ahcyl/Gatm/Oma1/Tbc1d5/Comt/Ulk2/Dap/Flcn/Gpr155/Atf4/Tmem126b/Sod1/Nppb/Kcnb1/Cfh/Asl/Trp53/Castor1/Dpyd/Apoe/Wdr45/Ehmt2/Hlcs/Zfp36/Ghr/Bmf/Ogt/Pik3c2b/Rragc/Lpl/Insr/Suv39h1/Cad/Tsc1/Scd4/Bcl2/Wdr59/Map1lc3a/Gabarapl2/Bcas3/Mios/Akt1/P…	139
GO:0050770	regulation of axonogenesis	0.0156282	0.413978	3.97198e-15	1.09299e-13	Sema3c/Fstl4/Vim/Tnfrsf12a/Ret/Nrp1/Plxnd1/Fn1/Twf2/Sema6b/Xk/Cxcl12/Wnt5a/Ifrd1/Epha4/Ngf/Plxnb3/Bdnf/Ulk2/Sema6d/Map1b/Plxnb1/Ptprs/Dixdc1/Picalm/Trak2/Apoe/Thy1/Chn1/Sema6a/Sema3g/Plxna1/Ntn1/Trpv2/Plxnc1/Zfyve27/Rgma/Sema3b/Golga2/Skil/Map2k1/Slit2/Tiam2/Zeb2/L1cam/Epha7/Dbn1/Sema7a/Sema5a/Ulk1/Ptk2/Ttc3/Plxna4/Limk1/Macf1/Snap91/Efna1/Map6/Stk11/Cyfip1/Eif2b2/Amigo1/Trak1/Lrp4/Cdh2/Nin/Ache/…	77
GO:0072521	purine-containing compound metabolic process	0.0306475	0.31524	4.01731e-15	1.09576e-13	Fmo2/Gnmt/Bcl2l1/Myh7/Nnt/Xdh/Dcakd/Ahcy/Ak4/Aldh1l1/Aldob/Hsd11b1/Rpia/Pde4a/Adcy7/Nos2/Ces1d/Lrrk2/Gpd1/Hmgcs2/Nudt12/Acaca/Aldh1l2/Nqo1/Adcy1/Abcg2/Nudt16/Nudt4/Nt5c1a/Ahcyl/Acsl5/Nampt/Slc25a13/Dcxr/Carmil1/Flcn/Cyb5r4/Mmut/Nudt15/Nppb/Prps2/Lacc1/Tigar/Cfh/Nt5e/Trp53/Nudt5/Far1/Atp6v1a/Dpyd/Ak3/Myc/Pank1/Dck/Adcy6/Entpd1/Gda/Gpd1l/Atpsckmt/Rpe/Parp1/Hmgcs1/Pde5a/Prpsap1/Adal/Hsd17b4/Pfas/Adc…	151
GO:0006913	nucleocytoplasmic transport	0.0247615	0.339833	4.26795e-15	1.14406e-13	Cdkn1a/Apod/Pik3r1/Wnk1/Ifi27/Ncbp2/Sqstm1/Ptpn11/Dnajc27/Lrrk2/Xpo1/Akap8l/Pkia/Bmal1/Abra/Bmp4/Kpna2/Ipo7/Ndc1/Nfkbia/Adam10/Nup35/Cry2/Wipf1/Bag3/Hnrnpa2b1/Appl1/Trp53/Hikeshi/Zpr1/Calr/Cabp1/Eif4e/Ranbp6/Prkcd/Cfl1/Tnpo3/Atxn1/Smo/Nxt2/Lmna/Tsc1/Kpna3/Desi1/Nsun2/Ipo4/Fam53b/Tgfb1/Ing1/Phax/Epm2a/Ipo8/Sfn/Tek/Akt1/Flna/Fgf9/Uhmk1/Pola2/Agap3/Ranbp3/Ltv1/Eif6/Stk3/Adar/Angpt1/Khdrbs1/Xpo5/Uaca…	122
GO:0051169	nuclear transport	0.0247615	0.339833	4.26795e-15	1.14406e-13	Cdkn1a/Apod/Pik3r1/Wnk1/Ifi27/Ncbp2/Sqstm1/Ptpn11/Dnajc27/Lrrk2/Xpo1/Akap8l/Pkia/Bmal1/Abra/Bmp4/Kpna2/Ipo7/Ndc1/Nfkbia/Adam10/Nup35/Cry2/Wipf1/Bag3/Hnrnpa2b1/Appl1/Trp53/Hikeshi/Zpr1/Calr/Cabp1/Eif4e/Ranbp6/Prkcd/Cfl1/Tnpo3/Atxn1/Smo/Nxt2/Lmna/Tsc1/Kpna3/Desi1/Nsun2/Ipo4/Fam53b/Tgfb1/Ing1/Phax/Epm2a/Ipo8/Sfn/Tek/Akt1/Flna/Fgf9/Uhmk1/Pola2/Agap3/Ranbp3/Ltv1/Eif6/Stk3/Adar/Angpt1/Khdrbs1/Xpo5/Uaca…	122
GO:0010634	positive regulation of epithelial cell migration	0.0142074	0.432099	5.1458e-15	1.36758e-13	Lcn2/Fgf16/Hdac9/Smoc2/Sparc/Gata2/Ets1/Kdr/Nrp1/Adam17/Lgmn/Atoh8/Clasp1/Hmox1/Wnt5a/Ppm1f/Bmp4/Amot/Prkca/Fgf2/Plcg2/Col18a1/Vegfc/Calr/Tgfbr2/Plpp3/Aqp1/Srpx2/Thbs1/Irs2/Clasp2/Fgf18/Tgfb1/Ptk2b/Glipr2/Plk2/Map2k3/Bcas3/Tek/Akt1/Enpp2/Tgfb2/Sema5a/Angpt1/Snai2/Ccbe1/Ptk2/Sirt1/Pdcd6/Capn7/Agt/Igf1/Gfus/Akt3/Gpi1/Dock5/Stat5a/Rhoj/Emc10/Ctsh/Jun/Rock2/Rhob/Rras/Adam9/Adgra2/Epb41l5/Zfp580/Amotl…	70
GO:0007178	transmembrane receptor protein serine/threonine kinase signaling pathway	0.0269941	0.328395	5.31928e-15	1.40171e-13	Col3a1/Nrep/Lox/Col1a2/Fstl1/Emilin1/Scx/Fstl4/Vim/Kdr/Twsg1/Hjv/Jade2/Adam17/Igsf1/Pbld1/Ltbp1/Atoh8/Peg10/Egr1/Lrg1/Ltbp4/Dab2/Fbn1/Wnt5a/Adamtsl2/Tet1/Htra1/Bmp4/Brms1l/Bmp6/Sulf1/Bmpr1a/Spred2/Tgfb1i1/Flcn/Smurf2/Gpr155/Gata6/Cited2/Furin/Ext1/Cav1/Appl1/Synj2bp/Aspn/Trp53/Ppm1l/Tob1/Fut8/Nrros/Creb1/Cidea/Tgfbr2/Smad9/Hdac2/Ogt/Thbs1/Bcl9l/Got1/Rbpms/Cav2/Parp1/Sfrp1/Trps1/Kcp/Rgma/Tgfb1/Zeb…	133
GO:1901888	regulation of cell junction assembly	0.0188756	0.378049	5.41851e-15	1.41586e-13	Apod/Fam107a/Pik3r1/Thbs2/Actg1/Eef2k/Kdr/Cux2/Nrp1/Dusp3/Gpm6b/Clasp1/Ptpn11/Ldb1/Gja1/Wnt5a/Myh9/Ppm1f/Arhgef15/Mdga1/S100a10/Col16a1/Bdnf/Ephb1/Lrrc4b/Prkca/Tbx5/Cav1/Ptprs/Rap2a/Ace/Thy1/Mmp14/Adgrl2/Ogt/Srpx2/Ntn1/Cfl1/Clasp2/Tsc1/Numb/Ppp1r9a/Dlg4/Ptk2b/Flrt2/Dusp22/Irx3/Tek/Enpp2/Slit2/Limch1/Epha7/Mef2c/Lims1/Ptpra/Snai2/Ptk2/Abi3bp/Lrfn4/Rapgef1/Adgre5/Agt/Phldb2/Ube2v2/Macf1/Ptprd/Arhga…	93
GO:0061448	connective tissue development	0.0225289	0.351266	5.57039e-15	1.44341e-13	Col3a1/Rorc/Lox/Ogn/Serpinh1/Col1a1/Ccn2/Loxl2/Pth1r/Col5a1/Bgn/Scx/Twsg1/Sik3/Mkks/Rflnb/Ptpn11/Egr1/Ddrgk1/Trpv4/Zbtb16/Pbxip1/Wnt5a/Bmp4/Bmp6/Col27a1/Ubb/Sulf1/Fgfr3/Bmpr1a/Il6ra/Prkca/Ift80/Ext1/Cflar/Fgf2/Adrm1/Prrx1/Ap1s2/Hspg2/Cfh/Nfatc2/Fosl2/Tgfbr2/Sox6/Smad9/Slc26a2/Efemp1/Thbs1/Csf1/Mustn1/Adamts7/Sptlc2/Lpl/Chaserr/Lmna/Parp1/Trps1/Thrb/Trip11/Fgf18/Tgfb1/Zeb1/Lncpint/Zmpste24/Rarb/Fg…	111
GO:0072594	establishment of protein localization to organelle	0.0292267	0.318584	6.69045e-15	1.71932e-13	Cdkn1a/Apod/Sh3kbp1/Pik3r1/Bcs1l/Clu/Ift122/Herpud1/Sqstm1/Lrrk2/Timm21/Pkia/Bmal1/Abra/Bmp4/Kpna2/Ipo7/Hspd1/Srp68/Ncoa4/Irgm1/Agk/Nfkbia/Tomm5/Nup35/Cry2/Vps37b/Mir208b/Rab7/Tomm40l/Get4/Bag3/Timm22/Pex16/Appl1/Zfyve16/Trp53/Hikeshi/Zpr1/Cabp1/Pdcd5/Ranbp6/Get1/Dnaja1/Fbxo7/Prkcd/Cfl1/Tnpo3/Zfp827/Man1a/Wbp2/Snx16/Smo/Lmna/Neurl1b/Kpna3/Spcs3/Fbxw7/Srp54c/Ipo4/Fam53b/Sec63/Tgfb1/Ap3b1/Ing1/Epm2…	144
GO:0042060	wound healing	0.0251674	0.335135	8.23554e-15	2.09903e-13	Cdkn1a/Col3a1/Col5a1/Smoc2/Gata2/Rab27a/Ddr2/Actg1/Kdr/Tnfrsf12a/Pdia4/Clasp1/Lrg1/Prcp/Hmox1/Fbln1/Fn1/Wnt5a/Anxa2/Myh9/Dysf/Mfsd2b/Gp1ba/Cxadr/S100a10/Alox5/Il6ra/Prkca/Ccr2/Adipor2/Ext1/Cav1/Cflar/Vwf/Emilin2/Fgf2/Mertk/Myof/Cfh/Pros1/Thbd/Plat/Apoe/Tspan9/P2ry1/C1galt1c1/Plpp3/Entpd1/Aqp1/Thbs1/Prkcd/Plau/Lyn/Ahnak/Clasp2/Dtnbp1/Fer1l5/Chmp6/Ap3b1/Flna/Yap1/Elk3/Entpd2/Lnpk/Pear1/Evl/Tec/Rab3…	124
GO:0006397	mRNA processing	0.0312563	0.310484	9.09277e-15	2.29868e-13	Cirbp/Rbm3/Csdc2/Ncbp2/Srek1ip1/Srsf5/Rbm28/Sugp1/Adarb1/Akap8l/Sart1/Rprd1a/Rprd2/Cstf2/Syf2/Hnrnpa2b1/Sympk/Hnrnph1/Tsen15/Ttf2/Rngtt/Rbm41/Zpr1/Snrpd1/Prpf19/Psip1/Snrpn/Larp7/Cir1/Pan2/Mfap1b/Pnpt1/Ptbp2/Dhx36/Scaf11/Cpsf4/Tra2a/Cstf3/Sf1/Papola/Rbfox1/Nsrp1/Rest/Leo1/Hnrnpll/Arl6ip4/Khdc4/Pcbp4/Tdrd3/Ctnnbl1/Sf3a2/Prmt9/Prpf6/Lgals3/Lsm6/Ddx1/Pnn/Ppil1/Hnrnpc/Srsf9/Rnpc3/Safb/Cpsf7/Adar/Cdk9…	154
GO:0001666	response to hypoxia	0.0180637	0.381974	1.01159e-14	2.5367e-13	Egln3/Hif3a/Eif4ebp1/Loxl2/Ak4/Bnip3/Kdr/Limd1/Adam17/Fndc1/Nos2/Egr1/Hmox1/Prmt2/Zfas1/Flt1/Epha4/Ddit4/Kcnk2/Kcnj11/Gata6/Cited2/Cav1/Rgcc/Hyou1/Fundc1/Tigar/Trp53/Nop53/Vegfc/Plat/Slc2a8/Ece1/Fosl2/Mmp2/Myc/Ogt/Aqp1/Plau/Kcnd2/Kcnk3/Mecp2/Camk2d/Suv39h1/Rest/Sod3/Cd38/Dnmt3a/Bcl2/Atm/Tgfb1/Rora/Tek/Akt1/Tm9sf4/Egln2/Map2k1/Daxx/Cr1l/Ptgis/Mlst8/Tgfb2/Tgfb3/Cpeb1/Wtip/Sirt2/Sirt1/P4hb/Ajuba/Npe…	89
GO:0016050	vesicle organization	0.0245586	0.337047	1.0887e-14	2.70824e-13	Doc2b/Cd34/Rab27a/Tom1/Sqstm1/Sphk1/Ptprn/Vps11/Pi4k2a/Coro1a/Dysf/S100a10/Erc1/Vamp8/Sec24d/Samd9l/Rab7/Washc1/Hps3/Sec23a/Pla2g5/Vav3/Ap1s2/Picalm/Atp6v1a/Apoe/Creb1/Clcn3/Tbc1d20/Uvrag/Septin8/Als2cl/Washc4/Cd2ap/Aqp1/Sar1a/Rab20/Tbc1d4/Grik5/Dnm3/Abca1/Bace2/Cav2/Laptm4b/Dtnbp1/Trappc2/Hook2/Fer1l5/Bcl2/Dlg4/Chmp6/Ap3b1/Arfgap3/Atp6v1g1/Zeb2/Shroom2/Arfgef2/Srgn/Cplx2/Gbf1/Rab3a/C2cd5/Chmp4b/…	121
GO:0034504	protein localization to nucleus	0.0233408	0.343284	1.16236e-14	2.86852e-13	Cdkn1a/Apod/Col1a1/Tfrc/Pik3r1/Glul/Sqstm1/Lrrk2/Zbtb16/Xpo1/Pkia/Bmal1/Abra/Bmp4/Kpna2/Ipo7/Dclk1/Nfkbia/Nup35/Cry2/Lzts2/Cdk5rap3/Flcn/Bag3/Appl1/Osbpl8/Trp53/Nop53/Hikeshi/Zpr1/Calr/Cabp1/Larp7/Ranbp6/Ogt/Cd2ap/Abca7/Prkcd/Cfl1/Tnpo3/Lmnb2/Smo/Cav2/Lmna/Parp1/Kpna3/Ipo4/Fam53b/Tgfb1/Ing1/Epm2a/Ipo8/Mcrs1/Tek/Akt1/Flna/Yap1/Fgf9/Jak1/Pola2/Agap3/Lmnb1/Stk3/Adar/Rrs1/Tgfb2/Angpt1/Ywhaz/Uaca/Mdm2…	115
GO:0003007	heart morphogenesis	0.0211082	0.353741	2.35182e-14	5.7582e-13	Myh7/Col5a1/Sema3c/Heyl/Ppp1r13l/Nrp1/Plxnd1/Ankrd1/Nrp2/Xirp1/Gja1/Wnt5a/Dchs1/Synpo2l/Sox17/Eln/Aldh1a2/Gja5/Bmp4/Xirp2/Bmpr1a/Actc1/Gata6/Cited2/Ext1/Tbx5/Dll4/Slit3/Trp53/Wnt11/Tgfbr2/Thbs1/Parva/Chd7/Pds5a/Tnnt2/C2cd3/Smo/Insr/Mrtfb/Abcc9/Fzd2/Tgfb1/Uty/Flrt2/Heg1/Nsd2/Zmpste24/Dll1/Asxl1/Tek/Cdc42/Flna/Yap1/Slit2/Fgf9/Mef2c/Tgfb2/Smad7/Angpt1/Mdm2/Snai2/Alpk2/Cav3/Rnf207/Crkl/Cpe/Naca/Fhl2/…	104
GO:0006790	sulfur compound metabolic process	0.0213111	0.352349	2.37857e-14	5.77821e-13	Gnmt/Sult1a1/Cdo1/Xdh/Ahcy/Tpst1/Ces1d/Mtr/Mettl16/Hmgcs2/Mthfr/Acaca/Dpep1/Ahcyl/Acsl5/Sulf1/Gusb/Comt/Abcb7/Pxylp1/Ext1/Mmut/Cth/Nubp2/Dse/Ciapin1/Xylt1/Far1/Iscu/Slc25a19/Gclm/Hlcs/Gns/Ghr/Mms19/Dnmt1/Blmh/Chst7/Hs3st5/Hnmt/Hmgcs1/Hsd17b4/Apip/Mical1/Ndst2/Amd1/Gpam/Pdk2/Acot11/Chpf2/Ednrb/Dgat2/Arsb/Angpt1/Fmo1/Slc35d2/Hexb/Mat2b/Dsel/Acot1/Gclc/Papss1/Ids/Btd/Mtrr/Ugdh/Naglu/Dlat/Lias/Chsy1/…	105
GO:0006486	protein glycosylation	0.0160341	0.396985	2.74612e-14	6.56844e-13	Galnt15/St8sia4/Tmtc2/B3galnt2/Pmm1/Mgat5/Tmtc1/Tmtc4/Gxylt2/Poglut3/Tet1/Alg9/Magt1/Gfpt1/Galnt11/Fktn/Pomk/Pomt1/Dpy19l1/Mgat3/Alg14/Uggt2/Ext1/Acer2/Xxylt1/Trak2/Galnt7/Fut8/St6gal1/Mogs/C1galt1c1/Galnt10/Dpm1/Entpd5/Ogt/St6galnac4/Tmtc3/Poglut2/B3galt6/Trip11/Ostc/Il15/Golga2/Alg2/Gcnt2/Galnt4/St8sia6/Stt3a/Large1/Alg3/St3gal2/Galnt16/Rxylt1/Arfgef1/Pofut1/Fkrp/Rpn2/Alg10b/Mgat2/Mlec/B4galt1/…	79
GO:0043413	macromolecule glycosylation	0.0160341	0.396985	2.74612e-14	6.56844e-13	Galnt15/St8sia4/Tmtc2/B3galnt2/Pmm1/Mgat5/Tmtc1/Tmtc4/Gxylt2/Poglut3/Tet1/Alg9/Magt1/Gfpt1/Galnt11/Fktn/Pomk/Pomt1/Dpy19l1/Mgat3/Alg14/Uggt2/Ext1/Acer2/Xxylt1/Trak2/Galnt7/Fut8/St6gal1/Mogs/C1galt1c1/Galnt10/Dpm1/Entpd5/Ogt/St6galnac4/Tmtc3/Poglut2/B3galt6/Trip11/Ostc/Il15/Golga2/Alg2/Gcnt2/Galnt4/St8sia6/Stt3a/Large1/Alg3/St3gal2/Galnt16/Rxylt1/Arfgef1/Pofut1/Fkrp/Rpn2/Alg10b/Mgat2/Mlec/B4galt1/…	79
GO:0042063	gliogenesis	0.0261823	0.324937	3.31746e-14	7.87446e-13	Col3a1/Tuba1a/Tspan2/Matn2/Vcan/Clu/Vim/Klf15/Gpm6b/Ptpn11/Fn1/Adgrg1/Flt1/Nr3c1/Afdn/Bin1/Bmp4/Sh3tc2/Aspa/Pmp22/Epha4/Fas/Adora2a/Adam22/Lamb1/Fgfr3/Ndn/Ccr2/Atp1b2/Ttc21b/Cspg4/Sod1/Fgf2/Tppp/Trp53/Vegfc/Nrros/Creb1/P2ry1/Csf1r/Prpf19/Mbd1/Nr1d1/Sox6/Myc/Hdac2/Plpp3/Efemp1/Cul4b/Eif2b3/Ntn1/Csf1/Syne2/Lyn/Reln/Atxn1/Smo/Exoc4/Mecp2/Clcf1/Ndrg1/Slc45a3/Tgfb1/Dusp10/Med12/Epm2a/Dll1/Eif2b5/Tnfrs…	129
GO:0062012	regulation of small molecule metabolic process	0.0257763	0.326478	3.54036e-14	8.33989e-13	Fmo2/Rorc/Gnmt/Bcl2l1/Cd74/Pth1r/Igfbp3/Etfbkmt/Akr1c14/Aldob/Hsd11b1/Fabp5/Nos2/Egr1/Ces1d/Dab2/Gpd1/Nr3c1/Myh9/Midn/Bmp6/Ddit4/Acsl5/Erlin2/Stard4/Comt/Flcn/C1qtnf2/Cav1/Sod1/Lacc1/Tigar/Trp53/Plcd1/Erlin1/Apoe/Creb1/P2ry1/Atcay/Nr1d1/Gpt2/Sorbs1/Myc/Ogt/Entpd1/Irs2/Slc35b4/Atpsckmt/Insr/Parp1/Rest/Thrb/Slc45a3/Ankrd26/Jmjd8/Ptk2b/Gnb3/Esrrb/Rora/Zmpste24/Akt1/Dhcr7/Me1/Map2k1/Coq3/Zbtb20/Pdk2/…	127
GO:0030100	regulation of endocytosis	0.0235437	0.337209	3.69359e-14	8.63543e-13	Bcl2l1/Plscr2/Apln/Gata2/Actb/Rab27a/Ston2/Actg1/Eef2k/Clu/Ahsg/Rin3/Sphk1/Dab2/Ptprc/Lrrk2/Wnt5a/Ighm/Anxa2/Myh9/Dysf/Bin1/Ehd4/Vamp8/Prkca/Tbc1d5/Sirpa/Pla2g5/Cav1/Appl1/Sod1/Plcg2/Mertk/Synj2bp/Rab21/Pros1/Picalm/Apoe/Calr/Csk/Efnb2/Cd63/Cd2ap/Abca7/Lman2/Colec11/Lpar1/Insr/Dtnbp1/Numb/Plscr1/Lbp/Fer1l5/Ston1/Dlg4/Tgfb1/Arhgap21/Il15/Itgav/Tnk2/Plk2/Dll1/Arrb2/Lgals3/Cdc42/Ldlrap1/Pacsin3/Rubc…	116
GO:1903320	regulation of protein modification by small protein conjugation or removal	0.0186726	0.369478	3.78677e-14	8.78721e-13	Fam107a/Dcun1d2/Wnk1/Herpud1/Sqstm1/Egr1/Sphk1/Lrrk2/Dysf/Ngf/Ubb/Fgfr3/Xiap/Washc1/Cdk5rap3/Ube2n/Cav1/Rasd2/Nop53/Septin4/Gps2/Ogt/Dnaja1/Cblb/Dnaja3/Gnl3/Fbxw7/Rchy1/Tcf25/Trib1/Epm2a/Trib2/Akt1/Arrb2/Sae1/Daxx/Per2/Ubxn1/Arrdc3/Smad7/Angpt1/Ube2d1/Sprtn/Atg5/Prkn/Gtpbp4/Ndfip2/Gclc/Pdcd6/Limk1/Mad2l2/Ube2v2/Rnf40/Pias1/Psmd10/Sirt7/Fyn/Mad2l1/Bag5/Sumo2/Mapk9/Gabarap/Pink1/Ube2l3/Pias4/Tnfaip…	92
GO:0031647	regulation of protein stability	0.022123	0.344937	3.94412e-14	8.95535e-13	Fam107a/Mylip/Cd74/Pik3r1/Clu/Stxbp4/Ddrgk1/Crtap/Lrrk2/Siah1a/Gpihbp1/Sox17/Epha4/Hspd1/Tnip2/Irgm1/Pfn2/Atp1b2/Apbb2/Get4/Bag3/Tmem25/Rab21/Trp53/Nop53/Lss/Creb1/Calr/Septin8/Nr1d1/Casp3/Plpp3/Fbxl3/Get1/Fbxo7/Usp2/Ank2/Tada3/Pyurf/Smo/Dnaja3/Lmna/Tsc1/Fbxw7/Bcl2/Nckap1/Ccnh/Nlk/Flna/Tyrobp/Stk3/Smad7/Ift46/Mdm2/Dazap2/Bag6/Prkn/Sirt1/Gtpbp4/Tmem183a/Hip1r/Dact1/Usp9x/Ip6k2/Prkra/Mtrr/Crebbp/Wd…	109
GO:0060485	mesenchyme development	0.022123	0.344937	3.94412e-14	8.95535e-13	Col1a1/Loxl2/Meox1/Sema3c/Heyl/Scx/Ret/Nrp1/Rflnb/Nrp2/Clasp1/Lrg1/Gja1/Dab2/Fn1/Sema6b/Wnt5a/Dchs1/Aldh1a2/Bmp4/Epha4/Bmpr1a/Spred2/Tgfb1i1/Sema6d/Cited2/Timp3/Ext1/Tbx5/Rgcc/Dact3/Tcf21/Wnt11/Tgfbr2/Myc/Hdac2/Sema6a/Slc39a10/Thbs1/Sema3g/Bcl9l/Cfl1/Smo/Exoc4/Mcrip1/Tcf15/Sfrp1/Clasp2/Bcl2/Sema3b/Tgfb1/Glipr2/Nckap1/Cdc42/Spred1/Flna/Gcnt2/Yap1/Zeb2/Fgf9/Mef2c/Trip10/Tgfb2/Smad7/Sema7a/Tgfb3/Edn…	109
GO:0043547	positive regulation of GTPase activity	0.0188756	0.367589	3.94563e-14	8.95535e-13	Itga6/Adrb1/Rasgrp3/Arap1/Arhgap29/Kalrn/Rgs4/Wnt5a/Arhgap27/Asap3/Bin1/Arhgef15/Ralgapa1/S100a10/Tbc1d1/Tbc1d17/Tbc1d5/Rapgef5/Tbc1d10c/Mmut/Plxnb1/Sipa1/Rsu1/Picalm/Pkp4/Tbc1d20/Thy1/Wnt11/Chn1/Tbc1d4/Agap2/Rapgef4/Asap2/Cav2/Tsc1/Dock6/Rgma/Ptk2b/Rgs10/Myo9a/Apc2/Dock8/Tbc1d8b/Map2k1/Tbc1d15/Tiam2/Agap3/C9orf72/Lims1/Arap3/Rapgef3/Snx9/Tbck/Gnb5/Crkl/Ralgps2/Rgs6/Dock7/Rapgef1/Usp6nl/Sgsm2/Den…	93
GO:0010595	positive regulation of endothelial cell migration	0.0107571	0.481818	4.60915e-14	1.03855e-12	Lcn2/Fgf16/Hdac9/Smoc2/Sparc/Gata2/Ets1/Kdr/Nrp1/Adam17/Lgmn/Atoh8/Hmox1/Wnt5a/Bmp4/Amot/Prkca/Fgf2/Col18a1/Vegfc/Calr/Plpp3/Srpx2/Thbs1/Fgf18/Tgfb1/Ptk2b/Plk2/Map2k3/Bcas3/Tek/Akt1/Sema5a/Angpt1/Snai2/Ccbe1/Sirt1/Pdcd6/Agt/Igf1/Gfus/Akt3/Gpi1/Stat5a/Rhoj/Emc10/Rock2/Rhob/Rras/Adgra2/Zfp580/Amotl1/Plcg1	53
GO:0030048	actin filament-based movement	0.0119748	0.453846	5.00273e-14	1.11111e-12	Myh7/Adrb1/Snta1/Acta2/Myh14/Myrip/Myo1b/Scn4b/Pde4b/Myh9/Cacnb2/Bin1/Epdr1/Gja5/Dsc2/Actc1/Wipf1/Cav1/Myo1e/Kcnh2/Parva/Sgcd/Ank2/Syne2/Tnnt2/Gpd1l/Camk2d/Abcc9/Hcn4/Akap6/Uty/Wasf2/Casq2/Flna/Zeb2/Limch1/Myo1d/Evl/Dbn1/Frmd6/Kcnj2/Strit1/Atp1a1/Cav3/Rnf207/Myh10/Ctnna3/Kcnj8/Myo1c/Pdpn/Myo9b/Shtn1/Myo6/Ccdc88c/Stc1/Epb41l5/Pkp2/Myo5b/Myl6	59
GO:0050803	regulation of synapse structure or activity	0.022123	0.343849	5.0122e-14	1.11111e-12	Ptprf/Tuba1a/Baiap2/Pik3r1/Thbs2/Sparc/Sparcl1/Eef2k/Cux2/Nrp2/Kalrn/Lrrk2/Marcks/Wnt5a/Afdn/Caprin1/Arhgef15/Epha4/Mdga1/Bdnf/Sybu/Adam10/Ephb1/Lrrc4b/Prkca/Rps6ka5/Tubb5/Ptprs/Picalm/Rap2a/Apoe/Adgrl2/Ogt/Srpx2/Rapgef4/Ntn1/Dhx36/Cfl1/Reln/Dnm3/Plxnc1/Mecp2/Abi2/Dtnbp1/Numb/Ppp1r9a/Dlg4/Ptk2b/Flrt2/Akt1/Cdc42/Slit2/Epha7/Mef2c/Septin11/Dctn1/Srgn/Dbn1/Ywhaz/Opa1/Ptk2/Abi3bp/Tanc1/Itsn1/Myh10/Lr…	109
GO:0050807	regulation of synapse organization	0.0217171	0.346278	5.03835e-14	1.11111e-12	Ptprf/Tuba1a/Baiap2/Pik3r1/Thbs2/Sparc/Sparcl1/Eef2k/Cux2/Nrp2/Kalrn/Lrrk2/Marcks/Wnt5a/Afdn/Caprin1/Arhgef15/Epha4/Mdga1/Bdnf/Adam10/Ephb1/Lrrc4b/Prkca/Rps6ka5/Tubb5/Ptprs/Picalm/Rap2a/Apoe/Adgrl2/Ogt/Srpx2/Rapgef4/Ntn1/Dhx36/Cfl1/Reln/Dnm3/Plxnc1/Mecp2/Abi2/Dtnbp1/Numb/Ppp1r9a/Dlg4/Ptk2b/Flrt2/Akt1/Cdc42/Slit2/Epha7/Mef2c/Septin11/Dctn1/Srgn/Dbn1/Ywhaz/Opa1/Ptk2/Abi3bp/Tanc1/Itsn1/Myh10/Lrfn4/A…	107
GO:0048762	mesenchymal cell differentiation	0.0188756	0.366142	5.19092e-14	1.13669e-12	Col1a1/Loxl2/Sema3c/Heyl/Ret/Nrp1/Rflnb/Nrp2/Clasp1/Lrg1/Gja1/Dab2/Fn1/Sema6b/Wnt5a/Aldh1a2/Bmp4/Epha4/Bmpr1a/Spred2/Tgfb1i1/Sema6d/Cited2/Timp3/Ext1/Rgcc/Dact3/Tcf21/Wnt11/Tgfbr2/Hdac2/Sema6a/Slc39a10/Sema3g/Bcl9l/Cfl1/Smo/Mcrip1/Sfrp1/Clasp2/Bcl2/Sema3b/Tgfb1/Glipr2/Cdc42/Spred1/Flna/Gcnt2/Zeb2/Mef2c/Trip10/Tgfb2/Smad7/Sema7a/Tgfb3/Ednrb/Sema5a/Ldlrad4/Snai2/Ddx17/Bambi/Ptk2/Lama5/Pdcd6/Mad2l2/…	93
GO:0045444	fat cell differentiation	0.0196874	0.359259	5.83878e-14	1.2662e-12	Rorc/Itga6/Retreg1/Ccnd1/Lama4/Adrb1/Gata2/Tlcd3b/Bnip3/Adgrf5/Mkks/Lrg1/Trpv4/Zbtb16/Fbn1/Wnt5a/Selenbp1/Bmal1/Cebpd/Dysf/Alox5/Tgfb1i1/Arl4a/Flcn/Tmem64/Osbpl8/Ap1s2/Tmem120a/Gps2/Creb1/Fosl2/Nr1d1/Grk5/Zfp36/Lrrc8c/Bbs7/Medag/Lpl/Sfrp1/Napepld/Ankrd26/Tgfb1/Dusp10/Gnb3/Fndc5/Fabp4/Rora/Trib2/Asxl1/Akt1/Atat1/Yap1/Prdm16/Per2/Stk3/Snai2/Metrnl/Sirt2/Sirt1/Dact1/Pias1/Zbtb7b/Atf5/Kcnj8/Igf1/Carm…	97
GO:2001242	regulation of intrinsic apoptotic signaling pathway	0.0156282	0.396907	5.8638e-14	1.2662e-12	Bcl2l1/Cd74/Prodh/Clu/Herpud1/Nacc2/Serinc3/Zfas1/Lrrk2/Siah1a/Cxcl12/Ybx3/Steap3/Uri1/Ubb/Ppif/Flcn/Atf4/Cav1/Sod1/Hyou1/Grina/Trp53/Septin4/Myc/Hdac2/Nck1/Mcl1/Dnaja1/Fbxo7/Parp1/Plscr1/Fbxw7/Bok/Bcl2/Creb3l1/Txndc12/Akt1/Skil/Map2k1/Cdkn2d/Nck2/Opa1/Mdm2/Snai2/Taf6/Prkn/Sirt1/P4hb/Ripk3/Prkra/Fyn/Fis1/Bmyc/Bag5/Bcl2l11/Creb3/Bclaf1/Pink1/Pias4/Parl/Xbp1/Dnm1l/Selenos/Pttg1ip/Mapk8ip1/G2e3/Tria…	77
GO:0034470	ncRNA processing	0.0267912	0.319613	6.78095e-14	1.45415e-12	Rbm3/Ints7/Ncbp2/Trmt1l/Mettl16/Ints2/Sbds/Sart1/Bmp4/Las1l/Eri1/Riok3/Trmt2b/Hnrnpa2b1/Hsd17b10/Ankrd16/Ints10/Rps27rt/Tsen15/Ago4/Trp53/Nop53/Wdr6/Mto1/Tfb1m/Larp7/Ngdn/Rpp25/Pnpt1/Wdr43/Chd7/Trmt1/Trmt12/Mecp2/Suv39h1/Exosc5/Ddx56/Nsun4/Tyw3/Nsun2/Tgfb1/Zmpste24/Akt1/Nop14/Lsm6/Ddx1/Utp3/Ctu2/Cdk5rap1/Ints6/Eif6/Cdkal1/Adar/Rrs1/Dkc1/Abt1/Dus4l/Mov10l1/Mettl3/Nat10/Npm3/Rnf113a2/Ddx17/Dimt1/Ts…	132
GO:0019318	hexose metabolic process	0.0190785	0.362934	7.03333e-14	1.49794e-12	Apod/Rorc/Gnmt/Pik3r1/Igfbp3/Aldob/Pmm1/Galm/Fabp5/Gpd1/Fbn1/Crtc2/Nr3c1/Midn/Pfkl/Slc25a13/Dcxr/Oma1/Kcnj11/Atf4/C1qtnf2/Man2a2/Tigar/Khk/Trp53/Slc2a8/Gpt2/B3glct/Sorbs1/Myc/Ogt/Irs2/Slc35b4/Got1/Pgm2l1/Insr/Slc45a3/Glb1/Gnb3/Esrrb/Rora/Fuca1/Zmpste24/Pgam1/Akt1/Pdk2/Per2/Galt/Kbtbd2/Oas1b/Inppl1/Slc25a12/Dgat2/Soga1/Cox11/Eno3/Prkn/Sirt1/Pofut1/Gpd2/Sirt7/Zfp692/Igf1/Pgk1/Stk11/C1qtnf1/Dlat/Ppa…	94
GO:0002040	sprouting angiogenesis	0.0119748	0.450382	7.59497e-14	1.60656e-12	Loxl2/Glul/Hdac9/Gata2/Kdr/Adamts9/Nrp1/Meox2/Hmox1/Flt1/Bmp4/Ramp2/Alox5/Fgf2/Dll4/Synj2bp/Vegfc/Efnb2/Sema6a/Srpx2/Thbs1/Parva/Fbxw7/Jmjd8/Tgfb1/Creb3l1/Ptk2b/Plk2/Ppp1r16b/Dll1/Itga5/Tek/Akt1/Cdc42/Spred1/Slit2/Jak1/Stard13/Bmper/Otulin/Epn1/Sema5a/Angpt1/Tspan18/Vstm4/Akt3/Mia3/Rhoj/Itgb1/Tjp1/Reck/Pkm/Ephb4/Adgra2/Rhoa/Smad1/Pik3r3/Mmrn2/Rnf213	59
GO:1903828	negative regulation of protein localization	0.0182667	0.368852	8.0081e-14	1.6825e-12	Apod/Bcl2l1/Wnk1/Pim3/Gpm6b/Ptpn11/Ppfia1/Dab2/Lrrk2/Fbn1/Inpp5k/Tmbim1/Midn/Pkia/Ppm1f/Pfkl/Tbc1d1/Dclk1/Os9/Lzts2/Cd200/Kcnj11/Flcn/Bag3/Gopc/Kcnb1/Trp53inp2/Picalm/Cyp51/Apoe/Lrrc15/Cabp1/Csk/Coro2b/Ogt/Dnaja1/Ube2g2/Rest/Sfrp1/Svip/Numb/Pde3b/Rhbdf1/Tgfb1/Plk2/Ripor2/Akt1/Ttbk2/Cdk9/Idh2/Angpt1/Ywhaz/Ctnna1/Prkn/Sirt1/Sirt4/Ndfip2/Pde8b/Rhoq/Naca/Cltc/Wwp2/Rab11fip5/Mark3/Dmtn/Pias4/Ubac2/Rab…	90
GO:0032984	protein-containing complex disassembly	0.0184697	0.366935	8.33353e-14	1.72753e-12	Nes/Ccn2/Lmod3/Bnip3/Wnk1/Eef2k/Tom1/Spta1/Trim54/Clasp1/Twf2/Trpv4/Dysf/Map1lc3b/Add3/Mtrfr/Ddit4/Vps16/Vamp8/Irgm1/Irak3/Carmil1/Map1b/Nav3/Lmod2/Nedd1/Mical3/Uvrag/Mfsd8/Myc/Mtrf1l/Eps8/Cfl1/Smarcb1/Insr/Mtpn/Capza1/Clasp2/Ogfod1/Swap70/Chmp6/Mical1/Map1lc3a/Apc2/Igf1r/Zmpste24/Tmod3/Stmn2/Ttbk2/Shroom2/Per2/Rubcn/Evl/Nckap5/Sema5a/Cebpg/Atg5/Chmp4b/Pym1/Clec16a/Tmod4/Chmp2a/Capzb/Asph/Taok1/B…	91
GO:0051403	stress-activated MAPK cascade	0.0184697	0.366935	8.33353e-14	1.72753e-12	Ccn2/Xdh/Fgd4/Dusp3/Sphk1/Dab2/Lrrk2/Trpv4/Wnt5a/Zfp110/Bmp4/Fas/Eda2r/Per1/Fktn/Fgfr3/Ephb1/Ccr2/Sirpa/Dusp1/Dixdc1/Rap2a/Gps2/Map2k6/Prdx1/Aida/Zfp36/Klhl31/Dnaja1/Taok3/Zfp622/Sfrp1/Tnik/Dusp10/Trib1/Ptk2b/Tlr3/Map2k3/Igf1r/Dusp22/Nppa/Map4k2/Akt1/Traf6/Cdc42/Map2k1/Daxx/Mapk11/Lmnb1/Stk3/Tgfb2/Ptk2/Prmt1/Ltbr/Gadd45b/Cav3/Rapgef1/Dact1/Agt/Tnfrsf19/Dusp16/Kcnj8/Sh3rf1/Mturn/Taok1/Mapk9/Mapk14…	91
GO:0045927	positive regulation of growth	0.022326	0.339506	1.00766e-13	2.07503e-12	Adrb1/Tnfrsf12a/Ccnd2/Nrp1/Adam17/Mkks/Sphk1/Cxcl16/Fn1/Twf2/Cxcl12/Ybx3/Wnt5a/Nr3c1/Afdn/Ppm1f/Ngf/Bdnf/Bmpr1a/Adam10/Gata6/Tbx5/Map1b/N6amt1/Supv3l1/Fgf2/Picalm/Zpr1/Apoe/Creb1/Lgi1/Mmp14/Ghr/Chd7/Ntn1/Csf1/Cfl1/Smarcb1/Smo/Trpv2/Insr/Mecp2/Mtpn/Sfrp1/Cd38/Zfyve27/Akap6/Bcl2/Ptk2b/Rftn1/Sfn/Igf1r/Dll1/Slc25a4/Akt1/Cdc42/Gpam/Hdgfl2/Yap1/Fgf9/L1cam/Mef2c/Trip10/Mlst8/Tgfb2/Dbn1/Smad7/Sema7a/Atp8…	110
GO:0090092	regulation of transmembrane receptor protein serine/threonine kinase signaling pathway	0.0190785	0.360153	1.19727e-13	2.44926e-12	Nrep/Lox/Fstl1/Emilin1/Fstl4/Kdr/Twsg1/Hjv/Adam17/Igsf1/Pbld1/Ltbp1/Peg10/Lrg1/Dab2/Fbn1/Wnt5a/Adamtsl2/Tet1/Htra1/Bmp4/Brms1l/Bmp6/Sulf1/Bmpr1a/Spred2/Tgfb1i1/Flcn/Smurf2/Gpr155/Gata6/Cited2/Furin/Cav1/Synj2bp/Aspn/Trp53/Tob1/Nrros/Cidea/Tgfbr2/Hdac2/Ogt/Thbs1/Bcl9l/Got1/Cav2/Parp1/Sfrp1/Kcp/Rgma/Tgfb1/Zeb1/Ing1/Rasl11b/Skil/Spred1/Prdm16/Wfikkn2/Zeb2/Fgf9/Bmper/Smad7/Tgfb3/Pmepa1/Ldlrad4/Bambi/…	94
GO:0030833	regulation of actin filament polymerization	0.0127867	0.431507	1.25303e-13	2.54658e-12	Baiap2/Arhgap18/Lmod3/Myadm/Tmsb4x/Tmsb10/Spta1/Mkks/Twf2/Coro1a/Cdc42ep2/Eln/Bin1/Add3/Pfn2/Arhgap28/Cdc42ep4/Carmil1/Washc1/Capn1/Cotl1/Lmod2/Vasp/Nck1/Prkcd/Eps8/Cfl1/Kank3/Mtpn/Capza1/Ppp1r9a/Ptk2b/Tmod3/Nckap1/Slit2/Abitram/Fchsd2/Mlst8/Evl/Dbn1/Nck2/Cdc42ep3/Snx9/Arfgef1/Hip1r/Tmod4/Prex1/Grb2/Pfn4/Capzb/Myo1c/Cyfip1/Tlr2/Dmtn/Rasa1/Pecam1/Sptb/Nckap1l/Rhoa/Sptan1/Actr3/Cyrib/Hax1	63
GO:0008654	phospholipid biosynthetic process	0.0170489	0.376682	1.39114e-13	2.8089e-12	Abca8b/Pik3r1/Chka/Adgrf5/Pigg/Fabp5/Abca8a/Tmem38b/Itpkb/Ttc7/Hmgcs2/Lclat1/Pi4k2a/Efr3b/Acsl5/Socs3/Socs5/Pgap1/Cish/Pla2g5/Ptdss1/Fgf2/Plcg2/Tmem150a/Far1/Pigq/Selenoi/Uvrag/Agpat1/Dpm1/Pigs/Gpat3/Pgap2/Pcyt2/Crls1/Sptlc2/Pik3c2b/Pyurf/Etnk1/Smg1/Hmgcs1/Plscr1/Pigu/Gpam/Sphk2/Ip6k1/Inppl1/Pigk/Socs2/Hexb/Lpcat1/Pigw/Pgap3/Dolk/Ajuba/Pigc/Ip6k2/Pla2g4a/Serac1/Bpnt1/Ip6k3/Pigo/Samd8/Pisd/Lpgat1/…	84
GO:0008154	actin polymerization or depolymerization	0.0156282	0.390863	1.52033e-13	3.04526e-12	Fam107a/Baiap2/Arhgap18/Lmod3/Myadm/Tmsb4x/Tmsb10/Spta1/Mkks/Twf2/Coro1a/Cdc42ep2/Eln/Bin1/Add3/Pfn2/Arhgap28/Cdc42ep4/Carmil1/Washc1/Capn1/Cotl1/Lmod2/Msrb1/Mical3/Vasp/Nck1/Gas7/Prkcd/Eps8/Cfl1/Kank3/Mtpn/Capza1/Ppp1r9a/Swap70/Mical1/Ptk2b/Tmod3/Nckap1/Slit2/Shroom2/Abitram/Fchsd2/Mlst8/Evl/Dbn1/Nck2/Sema5a/Cdc42ep3/Snx9/Micall2/Arfgef1/Hip1r/Tmod4/Diaph2/Msrb2/Prex1/Grb2/Pfn4/Capzb/Myo1c/Cyfip…	77
GO:0001935	endothelial cell proliferation	0.0144104	0.405714	1.52779e-13	3.04526e-12	Cd34/Loxl2/Xdh/Apln/Sparc/Col8a1/Gata2/Kdr/Adam17/Atoh8/Lrg1/Hmox1/Gja1/Enpep/Cxcl12/Wnt5a/Flt1/Vash1/Aldh1a2/Dysf/Bmp4/Plxnb3/Bmp6/Sulf1/Alox5/Fgfr3/Prkca/Cav1/Rgcc/Fgf2/Nppb/Dll4/Col18a1/Synj2bp/Hspg2/Vegfc/Apoe/Aggf1/Thbs1/Cav2/Slc39a9/Ppp1r16b/Tek/Akt1/Zeb2/Bmper/Mef2c/Sema5a/Vstm4/Stat1/Sirt1/Aimp1/Col4a3/Pdcd6/Igf1/Thbs4/Akt3/Xbp1/Pdcl3/Stat5a/Emc10/Jun/Nras/Mydgf/Tie1/Thap1/Zfp580/Nf1/Krit…	71
GO:0060047	heart contraction	0.0178608	0.368201	1.6927e-13	3.3525e-12	Myh7/Rps6ka2/Ccn2/Pik3r1/Apln/Adrb1/Tmem65/Snta1/Ppp1r13l/Tmem38b/Tnni2/Gja1/Zfas1/Rgs4/Scn4b/Pde4b/Cacnb2/Bin1/Gja5/Cxadr/Dsc2/Prkca/Actc1/Gata6/Ext1/Tbx5/Cav1/Sod1/Ace/Map2k6/Smtn/Kcnh2/Tnni3k/Sgcd/Ank2/Kcnd2/Tnnt2/Gpd1l/Camk2d/Abcc9/Pde5a/Hcn4/Thrb/Csrp3/Akap6/Uty/Map2k3/Zmpste24/Casq2/Nppa/Irx3/Cdc42/Flna/Bves/Tgfb2/Smad7/Ednrb/Mdm2/Kcnj2/Atg5/Hrc/Strit1/Sp4/Atp1a1/Cav3/Rnf207/Sirt1/Kcnd3/Gjc…	88
GO:1902905	positive regulation of supramolecular fiber organization	0.0148163	0.398907	1.93356e-13	3.80529e-12	Baiap2/Ccn2/Whamm/Nrp1/Trpv4/Ppm1f/Synpo2l/Cdc42ep2/Bin1/Arhgef15/S100a10/Pfn2/Cdc42ep4/Carmil1/Cav1/Map1b/Rgcc/Nav3/Lmod2/Sorbs3/Rhoc/Vasp/Tnxb/Synpo2/Wnt11/Nck1/Efemp2/Gda/Cfl1/Lpar1/Mecp2/Abi2/Tsc1/Swap70/Ptk2b/Wasf2/Nckap1/Cdc42/Stmn2/Flna/Limch1/Fchsd2/Dctn1/Mlst8/Evl/Nck2/Tgfb3/Sema5a/Rapgef3/Cdc42ep3/Snx9/Cav3/Limk1/Cx3cl1/Grb2/Git1/Myo1c/Cyfip1/Wdr1/Pxn/Smad3/Mapk8/Actn2/Cd47/Rock2/Arl2/C…	73
GO:0006163	purine nucleotide metabolic process	0.0280089	0.310811	2.02915e-13	3.96829e-12	Fmo2/Bcl2l1/Myh7/Nnt/Xdh/Dcakd/Ak4/Aldh1l1/Aldob/Hsd11b1/Rpia/Pde4a/Adcy7/Nos2/Ces1d/Lrrk2/Gpd1/Hmgcs2/Nudt12/Acaca/Aldh1l2/Nqo1/Adcy1/Nudt16/Nudt4/Nt5c1a/Acsl5/Nampt/Slc25a13/Dcxr/Flcn/Cyb5r4/Mmut/Nudt15/Nppb/Prps2/Lacc1/Tigar/Cfh/Nt5e/Trp53/Nudt5/Far1/Atp6v1a/Ak3/Myc/Pank1/Dck/Adcy6/Entpd1/Gda/Gpd1l/Atpsckmt/Rpe/Parp1/Hmgcs1/Pde5a/Prpsap1/Hsd17b4/Pfas/Adcy4/Tgfb1/Rora/Nppa/Slc4a7/Me1/Gpam/Map2k…	138
GO:0006644	phospholipid metabolic process	0.0239497	0.327778	2.07942e-13	4.04118e-12	Abca8b/Pik3r1/Chka/Plaat1/Pla2g12a/Adgrf5/Pigg/Fabp5/Abca8a/Tmem38b/Itpkb/Ttc7/Hmgcs2/Inpp5k/Lclat1/Pi4k2a/Efr3b/Acsl5/Socs3/Socs5/Pgap1/Sacm1l/Gata6/Cish/Pla2g5/Ptdss1/Fgf2/Plcg2/Tmem150a/Plcd1/Fig4/Far1/Pitpnc1/Pigq/Selenoi/Uvrag/Agpat1/Dpm1/Plpp3/Prkcd/Plpp5/Pigs/Gpat3/Pgap2/Pcyt2/Crls1/Sptlc2/Pik3c2b/Pyurf/Etnk1/Mecp2/Smg1/Hmgcs1/Plscr1/Napepld/Pla2g7/Gnb3/Pigu/Enpp2/Gpam/Sphk2/Ocrl/Ip6k1/Inp…	118
GO:0043409	negative regulation of MAPK cascade	0.0150193	0.395722	2.14868e-13	4.14986e-12	Emilin1/Dusp3/Errfi1/Fbln1/Dusp6/Dab2/Ptprc/Inpp5k/Epha4/Spry4/Per1/Fktn/Prkca/Spred2/Irak3/Sirpa/Cnksr3/Dusp1/Tbc1d10c/Cdk5rap3/Flcn/Timp3/Cav1/Synj2bp/Apoe/Gps2/Csk/Aida/Wnk2/Sema6a/Klhl31/Dnaja1/Taok3/Abca7/Prkcd/Lyn/Fem1a/Sfrp1/Ankrd26/Dusp10/Ranbp9/Igf1r/Nppa/Akt1/Spred1/Uchl1/E130311K13Rik/Inppl1/Ndrg2/Prmt1/Cav3/Rapgef1/Dact1/Agt/Ptpn6/Psmd10/Dusp16/Efna1/Igf1/Ace2/Dusp4/Xbp1/Hmgcr/Arrb1/D…	74
GO:0048588	developmental cell growth	0.0204993	0.347079	2.16387e-13	4.1534e-12	Pi16/Postn/Col14a1/Adrb1/Sema3c/Fstl4/Tnfrsf12a/Nrp1/Jade2/Nrp2/Fn1/Twf2/Prmt2/Arih2/Sema6b/Cxcl12/Rgs4/Wnt5a/Nr3c1/Afdn/Ifrd1/Ngf/Bdnf/Raph1/Dclk1/Ndn/Ulk2/Ttl/Sema6d/Ext1/Map1b/Mgll/Ptprs/Nrn1/Slit3/Rab21/Picalm/Apoe/Csf1r/Tgfbr2/Sema6a/Sema3g/Plxna1/Ntn1/Smo/Trpv2/Mecp2/Camk2d/Clasp2/Zfyve27/Akap6/Rgma/Sema3b/Slc25a4/Slc9a6/Slit2/Zeb2/L1cam/C9orf72/Epha7/Trip10/Dbn1/Smad7/Sema7a/Sema5a/Ctdp1/U…	101
GO:0030832	regulation of actin filament length	0.0140045	0.408284	2.32293e-13	4.43133e-12	Baiap2/Arhgap18/Lmod3/Myadm/Tmsb4x/Tmsb10/Spta1/Mkks/Twf2/Coro1a/Cdc42ep2/Eln/Bin1/Add3/Pfn2/Arhgap28/Cdc42ep4/Carmil1/Washc1/Capn1/Cotl1/Lmod2/Vasp/Nck1/Prkcd/Eps8/Cfl1/Kank3/Mtpn/Capza1/Ppp1r9a/Swap70/Ptk2b/Tmod3/Nckap1/Slit2/Shroom2/Abitram/Fchsd2/Mlst8/Evl/Dbn1/Nck2/Sema5a/Cdc42ep3/Snx9/Arfgef1/Hip1r/Tmod4/Prex1/Grb2/Pfn4/Capzb/Myo1c/Cyfip1/Tlr2/Dmtn/Rasa1/Wdr1/Pecam1/Sptb/Actn2/Nckap1l/Rhoa/…	69
GO:0003015	heart process	0.0184697	0.361111	2.45233e-13	4.64966e-12	Myh7/Rps6ka2/Ccn2/Pik3r1/Apln/Adrb1/Tmem65/Snta1/Ppp1r13l/Tmem38b/Tnni2/Gja1/Zfas1/Rgs4/Scn4b/Pde4b/Cacnb2/Bin1/Gja5/Cxadr/Dsc2/Prkca/Actc1/Gata6/Ext1/Tbx5/Cav1/Sod1/Ace/Map2k6/Smtn/Kcnh2/Tnni3k/Sgcd/Ank2/Kcnd2/Tnnt2/Gpd1l/Camk2d/Abcc9/Pde5a/Hcn4/Thrb/Csrp3/Akap6/Uty/Map2k3/Zmpste24/Casq2/Nppa/Irx3/Cdc42/Flna/Yap1/Bves/Tgfb2/Smad7/Ednrb/Mdm2/Kcnj2/Atg5/Hrc/Strit1/Sp4/Atp1a1/Cav3/Rnf207/Sirt1/Kcnd…	91
GO:1905897	regulation of response to endoplasmic reticulum stress	0.00852446	0.531646	2.74328e-13	5.1698e-12	Bcl2l1/Pik3r1/Ppp1r15a/Clu/Herpud1/Serinc3/Ddrgk1/Lrrk2/Alox5/Cav1/Hyou1/Grina/Crebrf/Nck1/Abca7/Pdia6/Svip/Tmem33/Bok/Creb3l1/Txndc12/Sgta/Ubxn1/Bak1/Nck2/Opa1/Bag6/Prkn/Sirt1/Pigbos1/Creb3/Xbp1/Manf/Usp14/Cops5/Nr1h3/Selenos/Tmem259/Atf6b/Ubqln2/Rnf185/Nfe2l1	42
GO:0043534	blood vessel endothelial cell migration	0.0113659	0.451613	2.80852e-13	5.26086e-12	Cyp1b1/Hdac9/Gata2/Ets1/Kdr/Nrp1/Adam17/Meox2/Prcp/Hmox1/Cxcl12/Myh9/Vash1/Amot/Prkca/Rgcc/Fgf2/Dll4/Col18a1/Vegfc/Apoe/Efnb2/Srpx2/Thbs1/Mecp2/Fbxw7/Fgf18/Tgfb1/Ptk2b/Plk2/Map2k3/Akt1/Spred1/Slit2/Stard13/Mef2c/Angpt2/Angpt1/Sirt1/Efna1/Igf1/Csnk2b/Akt3/Mia3/Stat5a/Rhoj/Itgb1/Ephb4/Rhoa/Amotl1/Nf1/Pik3r3/Gpx1/Plcg1/Mmrn2/Gadd45a	56
GO:0008064	regulation of actin polymerization or depolymerization	0.0138015	0.409639	2.8592e-13	5.26179e-12	Baiap2/Arhgap18/Lmod3/Myadm/Tmsb4x/Tmsb10/Spta1/Mkks/Twf2/Coro1a/Cdc42ep2/Eln/Bin1/Add3/Pfn2/Arhgap28/Cdc42ep4/Carmil1/Washc1/Capn1/Cotl1/Lmod2/Vasp/Nck1/Prkcd/Eps8/Cfl1/Kank3/Mtpn/Capza1/Ppp1r9a/Swap70/Ptk2b/Tmod3/Nckap1/Slit2/Shroom2/Abitram/Fchsd2/Mlst8/Evl/Dbn1/Nck2/Sema5a/Cdc42ep3/Snx9/Arfgef1/Hip1r/Tmod4/Prex1/Grb2/Pfn4/Capzb/Myo1c/Cyfip1/Tlr2/Dmtn/Rasa1/Wdr1/Pecam1/Sptb/Actn2/Nckap1l/Rhoa/…	68
GO:0140053	mitochondrial gene expression	0.0138015	0.409639	2.8592e-13	5.26179e-12	Mrpl3/Taco1/Rmnd1/Foxo3/Mrpl34/Tufm/Mtif2/Mrpl36/Mrpl19/Ptcd3/Tsfm/Hsd17b10/Supv3l1/Mrps22/Mpv17l2/Cfh/Dars2/Mto1/Mrpl49/Tfb1m/Yars2/Mtrf1l/Pnpt1/Lrpprc/Mrpl45/Nsun4/Tfam/Mrpl35/Gfm1/Malsu1/Cdk5rap1/Coa3/Mrps6/Mrps14/Mrps2/Wars2/Mrpl13/Ndufa7/Fastkd1/Mrpl18/Ptcd1/Tefm/Mtg1/Mrpl42/Fastkd2/Mrpl37/Mrps26/Mrps27/Mettl4/Mterf2/Gfm2/Mrpl21/Mrpl47/Trnt1/C1qbp/Mrpl10/Mrps25/Mrps9/Prkaa1/Mrpl48/Mterf3/Mrp…	68
GO:1901800	positive regulation of proteasomal protein catabolic process	0.0107571	0.464912	2.85978e-13	5.26179e-12	Clu/Herpud1/Rnf144b/Ddrgk1/Dab2/Lrrk2/Arih2/Nub1/Rnf144a/Csnk1e/Socs5/Cav1/Nop53/Rnf19b/Bbs7/Tmtc3/Fbxw7/Rchy1/Trib1/Plk2/Dda1/Trib2/Akt1/Sgta/Mdm2/Sirt2/Bag6/Prkn/Ecscr/Gclc/Ube2v2/Rnf40/Pias1/Psmd10/Sh3rf1/Sumo2/Il33/Mapk9/Gabarap/Chfr/Klhl40/Mapk8/Zyg11b/Tmem259/Ubqln2/Rnf185/Zer1/Cop1/Osbpl7/Cbfa2t3/Sh3rf2/Ankib1/Dab2ip	53
GO:2001235	positive regulation of apoptotic signaling pathway	0.0144104	0.40113	2.97557e-13	5.44263e-12	Unc5b/Pea15a/Clu/Tnfrsf12a/Ret/Nacc2/Ctsl/Ctsc/Serinc3/Ptprc/Siah1a/Wnt5a/Steap3/Fas/Adora2a/Ubb/Casp8/Flcn/Timp3/Cav1/Sod1/Trp53/Septin4/Eef1e1/Myc/Bmf/Nck1/Mcl1/Thbs1/Prkcd/Sfrp1/Trps1/Plscr1/Fbxw7/Bok/Skil/Daxx/Stk3/Tgfb2/Nck2/Ctnna1/Ltbr/Taf6/Sirt1/Dedd2/Ripk3/Agt/Prkra/Fis1/Bmyc/Bcl2l11/Mapk9/Tnfsf10/Bclaf1/Nfatc4/Pias4/Inca1/Dnm1l/Mapk8/Ppp1ca/Pdia3/Ctsh/Ddit3/Casp2/Msx1/Traf2/Nf1/Camk2b/Pl…	71
GO:0030041	actin filament polymerization	0.0140045	0.405882	3.26169e-13	5.93108e-12	Fam107a/Baiap2/Arhgap18/Lmod3/Myadm/Tmsb4x/Tmsb10/Spta1/Mkks/Twf2/Coro1a/Cdc42ep2/Eln/Bin1/Add3/Pfn2/Arhgap28/Cdc42ep4/Carmil1/Washc1/Capn1/Cotl1/Lmod2/Msrb1/Vasp/Nck1/Gas7/Prkcd/Eps8/Cfl1/Kank3/Mtpn/Capza1/Ppp1r9a/Ptk2b/Tmod3/Nckap1/Slit2/Abitram/Fchsd2/Mlst8/Evl/Dbn1/Nck2/Cdc42ep3/Snx9/Micall2/Arfgef1/Hip1r/Tmod4/Diaph2/Msrb2/Prex1/Grb2/Pfn4/Capzb/Myo1c/Cyfip1/Tlr2/Dmtn/Rasa1/Pecam1/Sptb/Nckap1…	69
GO:0070371	ERK1 and ERK2 cascade	0.0241526	0.324251	3.80615e-13	6.88088e-12	Ccn2/Cd74/Emilin1/Kdr/Acta2/Akap12/Nrp1/Adam17/Dusp3/Errfi1/Ptpn11/Dnajc27/Fbln1/Dusp6/Dab2/Fn1/Ptprc/Trpv4/Cxcl12/Myh9/Bmp4/Epha4/Ngf/Grb10/Cavin3/Fgfr3/Ephb1/Prkca/Spred2/Sirpa/Cnksr3/Dusp1/Tbc1d10c/Flcn/Timp3/Nqo2/Pla2g5/Cav1/Cflar/Fgf2/Synj2bp/Apoe/P2ry1/Csf1r/Ece1/Csk/Gpnmb/Wnk2/Myc/Sema6a/Abca7/Lyn/Camk2d/Clcf1/Fbxw7/Apip/Fgf18/Ankrd26/Tgfb1/Dusp10/Ptk2b/Glipr2/Itgav/Ranbp9/Tek/Arrb2/Spred1…	119
GO:1902904	negative regulation of supramolecular fiber organization	0.0144104	0.398876	4.12925e-13	7.42184e-12	Pik3r1/Lmod3/Myadm/Tmsb4x/Tmsb10/Emilin1/Clu/Arap1/Spta1/Mkks/Trim54/Clasp1/Ppfia1/Fkbp4/Twf2/Inpp5k/Coro1a/Dysf/Add3/Pfn2/Arhgap28/Carmil1/Map1b/Capn1/Nav3/Lmod2/Hspg2/Apoe/Coro2b/Prkcd/Eps8/Cfl1/Kank3/Mtpn/Capza1/Clasp2/Ppp1r9a/Swap70/Apc2/Wasf2/Tmod3/Stmn2/Slit2/Ttbk2/Shroom2/Evl/Dbn1/Dyrk1a/Cav3/Prkn/Arfgef1/Hip1r/Tmod4/Inpp5j/Phldb2/Arhgap6/Pfn4/Capzb/Pfdn4/Taok1/Stmn1/Ldlr/Tlr2/Dmtn/Pecam1/…	71
GO:0046486	glycerolipid metabolic process	0.0247615	0.321053	4.19714e-13	7.50052e-12	Pik3r1/Chka/Plaat1/Pigg/Fabp5/Ptpn11/Pnpla2/Itpkb/Ces1d/Ttc7/Gpd1/Inpp5k/Lclat1/Gpihbp1/Pi4k2a/Efr3b/Acsl5/Socs3/Socs5/Pgap1/Sacm1l/Cish/Pla2g5/Ptdss1/Cav1/Mgll/Fgf2/Plcg2/Tmem150a/Plcd1/Fig4/Far1/Pitpnc1/Pigq/Apoe/Tnxb/Selenoi/Uvrag/Agpat1/Dpm1/Pigs/Gpat3/Pgap2/Pcyt2/Crls1/Pik3c2b/Pyurf/Etnk1/Lpl/Mecp2/Smg1/Plscr1/Thrb/Napepld/Pla2g7/Plce1/Gnb3/Pigu/Enpp2/Gpam/Gk/Ocrl/Ip6k1/Inppl1/Plpp1/Pigk/Dga…	122
GO:0072001	renal system development	0.0233408	0.326705	5.35642e-13	9.51752e-12	Cenpf/Gsta3/Vcan/Heyl/Ret/Nrp1/Plxnd1/Zfp950/Klf15/Nek1/Egr1/Nid1/Lrrk2/Zbtb16/Enpep/Fbn1/Wnt5a/Dchs1/Col4a1/Cc2d2a/Sox17/Aldh1a2/Bmp4/Epha4/Bmp6/Rpgrip1l/Irx1/Bdnf/Prom1/Sulf1/Il6ra/Lzts2/Flcn/Frem2/Ext1/Zng1/Cflar/Fgf2/Myo1e/Tbc1d32/Cfh/Tns2/Ace/Tcf21/Wnt11/Efnb2/Myc/Smad9/Schip1/Aqp1/Invs/Pds5a/Ift20/Smo/Sfrp1/Tsc1/Anxa4/Pcnt/Bcl2/Tgfb1/Plce1/Zmpste24/Dll1/Asxl1/Sgpl1/Irx3/Tek/Odc1/Yap1/Slit2/…	115
GO:0001822	kidney development	0.0225289	0.330357	5.99759e-13	1.05962e-11	Cenpf/Gsta3/Vcan/Heyl/Ret/Nrp1/Plxnd1/Zfp950/Klf15/Nek1/Egr1/Nid1/Lrrk2/Zbtb16/Enpep/Fbn1/Wnt5a/Dchs1/Cc2d2a/Sox17/Bmp4/Epha4/Bmp6/Rpgrip1l/Irx1/Bdnf/Prom1/Sulf1/Il6ra/Lzts2/Flcn/Frem2/Ext1/Zng1/Cflar/Fgf2/Myo1e/Tbc1d32/Cfh/Tns2/Ace/Tcf21/Wnt11/Efnb2/Myc/Smad9/Schip1/Aqp1/Invs/Pds5a/Ift20/Smo/Sfrp1/Tsc1/Anxa4/Pcnt/Bcl2/Tgfb1/Plce1/Zmpste24/Dll1/Asxl1/Sgpl1/Irx3/Tek/Odc1/Yap1/Slit2/Rarb/Irx2/Timel…	111
GO:0062197	cellular response to chemical stress	0.0215141	0.335443	6.69043e-13	1.17063e-11	Lcn2/Cyp1b1/Trp53inp1/Mgst1/Ddr2/Bnip3/Wnk1/Selenon/Sqstm1/Sphk1/Hmox1/Lrrk2/Trpv4/Ybx3/Foxo3/Bmal1/Nqo1/Mmp3/Dysf/Bmp4/Fas/Alox5/Ermp1/Ppif/Sirpa/Mgat3/Pla2r1/Atf4/Cav1/Capn1/Ercc6l2/Sod1/Mpv17l2/Trp53/Fut8/Mmp2/Prdx1/Casp3/Hdac2/Pnpt1/Dnaja1/Aqp1/Lrrc8c/Prkcd/Cfl1/Parp1/Tsc1/Sod3/Chuk/Atm/Gsr/Akt1/Nlk/Pdk2/Agap3/Dhfr/Mlst8/Atg5/Srxn1/Sirt2/Micu1/Prkn/Mapkap1/Sirt1/Prkaa2/Ripk3/Prkra/Xrcc6/Fyn/N…	106
GO:1903052	positive regulation of proteolysis involved in protein catabolic process	0.0117719	0.43609	6.70121e-13	1.17063e-11	Clu/Herpud1/Rnf144b/Ctsc/Ddrgk1/Dab2/Lrrk2/Arih2/Nub1/Rnf144a/Csnk1e/Socs5/Tgfb1i1/Cav1/Nop53/Rnf19b/Bbs7/Tmtc3/Fbxw7/Rchy1/Trib1/Ptk2b/Plk2/Dda1/Trib2/Akt1/Sgta/Mdm2/Ptk2/Sirt2/Bag6/Prkn/Ecscr/Gclc/Ube2v2/Rnf40/Pias1/Psmd10/Sh3rf1/Sumo2/Il33/Mapk9/Gabarap/Chfr/Klhl40/Mapk8/Zyg11b/Tmem259/L3mbtl3/Ubqln2/Rnf185/Zer1/Cop1/Osbpl7/Cbfa2t3/Sh3rf2/Ankib1/Dab2ip	58
GO:0010811	positive regulation of cell-substrate adhesion	0.0121778	0.428571	6.80939e-13	1.18213e-11	Spock2/Itga6/Ecm2/Myadm/Smoc2/Col8a1/Emilin1/Ninj1/Kdr/Nrp1/Hacd1/Ptpn11/Nid1/Fbln1/Dab2/Fn1/Myh9/Ppm1f/S100a10/Col16a1/Ccdc80/Carmil1/Hsd17b12/Rsu1/Calr/Thy1/Egflam/Thbs1/Efemp2/Csf1/Cfl1/Tsc1/Ptk2b/Itga5/Tek/Enpp2/Cdc42/Flna/L1cam/Cdk6/Dbn1/Lims1/Lims2/Abi3bp/Crkl/Utrn/Vtn/P4hb/Prex1/Nedd9/Gfus/Smad3/Dock5/Smoc1/Itgb1/C1qbp/Dmd/Rras/Iqgap1/Epb41l5	60
GO:0099173	postsynapse organization	0.0182667	0.357143	6.84307e-13	1.18213e-11	Ptprf/Baiap2/Actb/Eef2k/Cux2/Nrp1/Lgmn/Nrp2/Kalrn/Lrrk2/Marcks/Wnt5a/Afdn/Caprin1/Arhgef15/Epha4/Adam10/Ephb1/Lrrc4b/Rps6ka5/Ptprs/Apoe/Stk38l/Nrxn2/Sorbs1/Snx27/Arhgef9/Rapgef4/Dhx36/Cfl1/Reln/Dnm3/Insr/Dnaja3/Abi2/Chrnb1/Dtnbp1/Numb/Ppp1r9a/Dlg4/Ptk2b/Myo9a/Wasf2/Igf1r/Akt1/Cdc42/Epha7/Srgn/Dbn1/Opa1/Abi3bp/Lama5/Tanc1/Crkl/Itsn1/Myh10/Dock7/Lrfn4/Hip1r/Dact1/Iqsec3/Ptprd/Grip2/Efna1/Fyn/Mesd/E…	90
GO:0060560	developmental growth involved in morphogenesis	0.0202963	0.342466	7.21301e-13	1.23915e-11	Postn/Sema3c/Fstl4/Tnfrsf12a/Nrp1/Jade2/Nrp2/Fn1/Twf2/Sema6b/Cxcl12/Wnt5a/Afdn/Ifrd1/Bmp4/Ngf/Bdnf/Raph1/Ppp2r3a/Dclk1/Ndn/Ulk2/Lzts2/Ttl/Sema6d/Ext1/Map1b/Mgll/Ptprs/Nrn1/Slit3/Rab21/Picalm/Apoe/Csf1r/Wnt11/Tgfbr2/Sema6a/Sema3g/Plxna1/Ntn1/Csf1/Cfl1/Smo/Trpv2/Mecp2/Tmtc3/Sfrp1/Clasp2/Zfyve27/Rgma/Sema3b/Tgfb1/Med12/Slc9a6/Yap1/Slit2/Zeb2/L1cam/C9orf72/Epha7/Bin3/Dbn1/Sema7a/Sema5a/Ulk1/Prkn/Ttc3…	100
GO:0070085	glycosylation	0.016846	0.368889	7.25666e-13	1.2398e-11	Galnt15/St8sia4/Tmtc2/B3galnt2/Pmm1/Mgat5/Tmtc1/Tmtc4/Gxylt2/Poglut3/Tet1/Alg9/Magt1/Ggta1/Gfpt1/Galnt11/Fktn/Pomk/Pomt1/Dpy19l1/Mgat3/Alg14/Uggt2/Ext1/Acer2/Xxylt1/Trak2/Galnt7/Fut8/St6gal1/Mogs/C1galt1c1/Galnt10/Dpm1/Entpd5/Ogt/St6galnac4/Tmtc3/Poglut2/B3galt6/Trip11/Ostc/Il15/Golga2/Alg2/Cog5/Gcnt2/Galnt4/B4galt6/St8sia6/Stt3a/Large1/Alg3/St3gal2/Galnt16/Rxylt1/Cog6/Arfgef1/Pofut1/Fkrp/Rpn2/Al…	83
GO:0051495	positive regulation of cytoskeleton organization	0.0152222	0.384615	8.15728e-13	1.38606e-11	Nes/Baiap2/Ccn2/Whamm/Nrp1/Trpv4/Ppm1f/Synpo2l/Cdc42ep2/Bin1/Arhgef15/Add3/S100a10/Pfn2/Cdc42ep4/Carmil1/Cav1/Map1b/Rgcc/Nav3/Lmod2/Sorbs3/Rhoc/Vasp/Synpo2/Wnt11/Cenpj/Nck1/Gda/Cfl1/Lpar1/Mecp2/Abi2/Tsc1/Swap70/Ptk2b/Wasf2/Nckap1/Cdc42/Stmn2/Flna/Limch1/Fchsd2/Dctn1/Mlst8/Evl/Nck2/Tgfb3/Sema5a/Rapgef3/Cdc42ep3/Snx9/Cav3/Limk1/Cx3cl1/Grb2/Git1/Myo1c/Cyfip1/Wdr1/Pxn/Smad3/Mapk8/Actn2/Katnbl1/Cd47/R…	75
GO:0060996	dendritic spine development	0.0117719	0.432836	9.85994e-13	1.66626e-11	Baiap2/Eef2k/Fstl4/Cux2/Kalrn/Lrrk2/Marcks/Nr3c1/Afdn/Caprin1/Epha4/Adam10/Ephb1/Uba6/Ptprs/Apoe/Hdac2/Dhx36/Cfl1/Reln/Dnm3/Lpar1/Mecp2/Abi2/Dtnbp1/Ppp1r9a/Dlg4/Plk2/Slc9a6/Cdc42/Palm/Mef2c/Dbn1/Nck2/Opa1/Abi3bp/Itsn1/Crebbp/Git1/Efna1/Camk1/Pbrm1/Arf4/Camk2a/Dnm1l/Llph/Caprin2/Actr2/Eif4g2/Prmt3/Arhgap44/Arid1b/Mapk6/Bhlhb9/Actr3/Myo5b/Tanc2/Camk2b	58
GO:0034655	nucleobase-containing compound catabolic process	0.0261823	0.311594	1.00548e-12	1.69001e-11	Tent5b/Cirbp/Xdh/Csdc2/Ahcy/Igfbp3/Tent5a/Vim/Pde4a/Ncbp2/Mettl16/Tnrc6a/Caprin1/Nudt12/Dut/Nudt16/Nudt4/Nt5c1a/Ahcyl/Brf1/Dffa/Skic2/Nudt15/Supv3l1/Wdr82/Ago4/Nt5e/Tob1/Zpr1/Nudt5/Dpyd/Dcp2/Cidea/Cdadc1/Trir/Zfp36/Pan2/Skic3/Rida/Entpd5/Pnpt1/Entpd1/Gda/Lrpprc/Dhx36/Exosc5/Smg1/Pde5a/Adal/Nsun2/Atm/Pcbp4/Phax/Nt5c3/Ybx2/Lsm6/Entpd2/Hnrnpc/Galt/Dkc1/Sidt2/Nudt1/Mettl3/Zc3h4/Fxr2/Fastkd1/Pym1/Larp…	129
GO:0018209	peptidyl-serine modification	0.0227319	0.326531	1.11359e-12	1.86165e-11	Tfrc/Rps6ka2/Ppp1r15a/Mknk2/Wnk1/Ret/Poglut3/Lrrk2/Wnt5a/Inpp5k/Fnip2/Ppm1f/Ggnbp2/Csnk1e/Ngf/Sbk1/Bdnf/Hipk1/Irgm1/Dclk1/Pfn2/Prkca/Ulk2/Cnksr3/Rps6ka5/Cav1/Sgk3/Vrk1/Stk38l/Mapkapk3/Pnck/Tgfbr2/Ogt/Nck1/Prkcd/Sh2d3c/Gpd1l/Camk2d/Poglut2/Smg1/Chuk/Bcl2/Atm/Tgfb1/Plk2/Epm2a/Mast3/Tek/Akt1/Nlk/Arrb2/Pdk2/Ttbk2/Uhmk1/Bak1/Top1/Dyrk1a/Smad7/Nck2/Angpt1/Mast2/Ulk1/Hrc/Galnt16/Srpk1/Mapkap1/Dock7/Nek7…	112
GO:0008380	RNA splicing	0.027806	0.305122	1.14139e-12	1.89793e-11	Cirbp/Pik3r1/Rbm3/Ncbp2/Srek1ip1/Srsf5/Rbm28/Sugp1/Sart1/Syf2/Hnrnpa2b1/Hnrnph1/Tsen15/Ttf2/Ccnl2/Rbm41/Zpr1/Snrpd1/Prpf19/Psip1/Snrpn/Larp7/Cir1/Mfap1b/Ptbp2/Tada3/Scaf11/Tra2a/Sf1/Ahnak/Rbfox1/Nsrp1/Rest/Hnrnpll/Arl6ip4/Khdc4/Pcbp4/Ctnnbl1/Sf3a2/Prpf6/Lgals3/Zfp638/Lsm6/Ddx1/Pnn/Polr2a/Ppil1/Hnrnpc/Srsf9/Rnpc3/Dyrk1a/Cdc5l/Khdrbs1/Clasrp/Mettl3/Srrm4/Fxr2/Sf3b3/Rnf113a2/Srsf6/Xab2/Snrpa1/Srsf7/…	137
GO:0032868	response to insulin	0.0186726	0.351145	1.16953e-12	1.93437e-11	Ptprf/Pik3r1/Eif4ebp1/Hdac9/Ahsg/Klf15/Sesn3/Stxbp4/Ptpn11/Egr1/Marcks/Trpv4/Srsf5/Inpp5k/Sco1/Grb14/Grb10/Socs3/Prkca/Cry2/Appl1/Osbpl8/Khk/Tns2/Slc2a8/Sorbs1/Ogt/Nck1/Prkcd/Tbc1d4/Irs2/Eprs1/Lpl/Insr/Cav2/Parp1/Cad/Tsc1/Pde3b/Csrp3/Ankrd26/Igf1r/Akt1/Gpam/Snx5/Map2k1/Pdk2/Ggh/Kbtbd2/Eif6/Inppl1/Rab31/Ptpra/Cpeb1/Opa1/C2cd5/Soga1/Appl2/Sirt1/Rhoq/Agt/Zbtb7b/Eif4ebp2/Grb2/Lpin2/Kcnj8/Sgcb/Myo1c/C…	92
GO:0048660	regulation of smooth muscle cell proliferation	0.0150193	0.38342	1.38427e-12	2.27744e-11	Cdkn1a/Apod/Ogn/Pik3r1/Apln/Igfbp3/Ddr2/Egr1/Hmox1/Flt1/Bmp4/Igfbp5/Nampt/Calcrl/Bmpr1a/Il6ra/Prkca/Comt/Timp3/Nqo2/Cav1/Fgf2/Nppb/Trp53/Apoe/Mmp2/Tgfbr2/Foxj2/Myc/Thbs1/Efemp2/Dnmt1/Sf1/Camk2d/Tgfb1/Trib1/Il15/S1pr2/Igf1r/Akt1/Traf6/Zfp143/Ldlrap1/Fgf9/Mef2c/Tgfb3/Ndrg2/Mdm2/Ptk2/Ndrg4/Agt/Cx3cl1/Ptgir/Xrcc6/Igf1/Hpgd/Ace2/Ppargc1a/Tnfaip3/Hmgcr/C3ar1/Akr1b1/P2ry6/Jun/Irak1/Pde1a/Pdgfd/Rhoa/Egfr…	74
GO:0035966	response to topologically incorrect protein	0.0117719	0.42963	1.44262e-12	2.34344e-11	Pik3r1/Ppp1r15a/Hsph1/Ccnd1/Clu/Herpud1/Tmtc4/Ddrgk1/Pmp22/Hspd1/Dnajb14/Os9/Ermp1/Cdk5rap3/Atf4/Bag3/Uggt2/Edem3/Optn/Erp44/Crebrf/Nck1/Abca7/Thbs1/Pdia6/Rnf126/Aup1/Tmem33/Bok/Creb3l1/Dnajb12/Daxx/Bak1/Rhbdd1/Abcb10/Nck2/Jkamp/Bag6/Ube2j2/Pigbos1/Dnajb9/Ero1a/Dnajc18/Creb3/Thbs4/Xbp1/Manf/Cops5/Erlec1/Uggt1/Selenos/Atf6b/Rnf185/Ngly1/Ddit3/Ufd1/Ube2w/Dab2ip	58
GO:0051893	regulation of focal adhesion assembly	0.00730668	0.5625	1.447e-12	2.34344e-11	Apod/Fam107a/Actg1/Kdr/Nrp1/Dusp3/Gpm6b/Clasp1/Ptpn11/Ldb1/Myh9/Ppm1f/S100a10/Col16a1/Thy1/Mmp14/Cfl1/Clasp2/Tsc1/Dusp22/Tek/Enpp2/Limch1/Lims1/Ptpra/Ptk2/Phldb2/Macf1/Arhgap6/Coro1c/Dmtn/Smad3/Iqgap1/Peak1/Vcl/Epb41l5	36
GO:0090109	regulation of cell-substrate junction assembly	0.00730668	0.5625	1.447e-12	2.34344e-11	Apod/Fam107a/Actg1/Kdr/Nrp1/Dusp3/Gpm6b/Clasp1/Ptpn11/Ldb1/Myh9/Ppm1f/S100a10/Col16a1/Thy1/Mmp14/Cfl1/Clasp2/Tsc1/Dusp22/Tek/Enpp2/Limch1/Lims1/Ptpra/Ptk2/Phldb2/Macf1/Arhgap6/Coro1c/Dmtn/Smad3/Iqgap1/Peak1/Vcl/Epb41l5	36
GO:0033157	regulation of intracellular protein transport	0.0170489	0.362069	1.70011e-12	2.73909e-11	Apod/Pik3r1/Lcp1/Ifi27/Ptpn11/Dnajc27/Lrrk2/Inpp5k/Xpo1/Pkia/Bmp4/Sh3tc2/Os9/Wipf1/Bag3/Kcnb1/Zpr1/Cabp1/Septin8/Tamalin/Pdcd5/Ogt/Sar1a/Prkcd/Ube2g2/Smo/Svip/Fbxw7/Pcnt/Tgfb1/Cep131/Epm2a/Oaz2/Sfn/Tek/Tm9sf4/Cdc42/Flna/Uhmk1/Hspa1l/Tcaf1/Stom/Tcaf2/Angpt1/Uaca/Rapgef3/C2cd5/Mdm2/Ipo5/Sirt7/Fyn/Erbb2/Asph/Camk1/Myo1c/Fis1/Pink1/Dmtn/Parl/Xbp1/Mapk14/Ubac2/Rab23/Srebf1/Tmem30a/Erlec1/Prnp/Dmap1/Ei…	84
GO:0032231	regulation of actin filament bundle assembly	0.0105541	0.452174	1.84567e-12	2.95829e-11	Ccn2/Pik3r1/Actg1/Arap1/Nrp1/Mkks/Clasp1/Ppfia1/Inpp5k/Ppm1f/Asap3/Synpo2l/Arhgef15/S100a10/Pfn2/Arhgap28/Carmil1/Rgcc/Sorbs3/Rhoc/Synpo2/Wnt11/Coro2b/Cfl1/Kank3/Lpar1/Clasp2/Tsc1/Ppp1r9a/Swap70/Wasf2/Cdc42/Flna/Limch1/Evl/Dbn1/Tgfb3/Rapgef3/Prkn/Limk1/Phldb2/Cx3cl1/Arhgap6/Stmn1/Pxn/Smad3/Cd47/Rock2/Tjp1/Rhoa/Ccdc88a/Ttc8	52
GO:0031396	regulation of protein ubiquitination	0.0160341	0.370892	1.85836e-12	2.96335e-11	Fam107a/Wnk1/Herpud1/Sqstm1/Sphk1/Lrrk2/Dysf/Ngf/Ubb/Fgfr3/Xiap/Washc1/Cdk5rap3/Ube2n/Cav1/Rasd2/Septin4/Gps2/Ogt/Dnaja1/Cblb/Dnaja3/Fbxw7/Rchy1/Tcf25/Trib1/Epm2a/Trib2/Akt1/Arrb2/Daxx/Per2/Ubxn1/Arrdc3/Smad7/Angpt1/Ube2d1/Sprtn/Atg5/Prkn/Gtpbp4/Ndfip2/Gclc/Pdcd6/Limk1/Mad2l2/Ube2v2/Rnf40/Psmd10/Sirt7/Fyn/Mad2l1/Bag5/Mapk9/Gabarap/Pink1/Ube2l3/Tnfaip3/Chfr/Klhl40/Rassf1/Parp10/Gnl3l/Mapk8/Arrb1/P…	79
GO:0051656	establishment of organelle localization	0.0296326	0.297352	1.88708e-12	2.99378e-11	Tuba1a/Cenpf/Gata2/Rab27a/Ptgds/Myrip/Myo1b/Il4ra/Clasp1/Hmox1/Lrrk2/Armcx3/Xpo1/Steap3/Myh9/Dipk2a/Kif5c/Tspan4/Cenpc1/Spice1/Vamp8/Clmn/Sybu/Dynll1/Ubb/Rab7/Ttl/Map1b/Myo1e/Ap1s2/Crocc/Picalm/Trak2/Tspan9/Lat2/Nudc/Mis12/Sar1a/Ntn1/Syne2/Kxd1/Lyn/Cfl1/Dnm3/Llgl2/Lmnb2/Gpsm1/Exoc4/Mecp2/Lmna/Clasp2/Dtnbp1/Snhg15/Tacc1/Trappc2/Trip11/Atm/Tcirg1/Chmp6/Arhgap21/Ap3b1/Cdc23/Arfgap3/Nppa/Map4k2/Cdc42…	146
GO:0048675	axon extension	0.0121778	0.41958	2.0549e-12	3.24347e-11	Sema3c/Tnfrsf12a/Nrp1/Nrp2/Fn1/Twf2/Sema6b/Cxcl12/Wnt5a/Ifrd1/Ngf/Bdnf/Raph1/Dclk1/Ndn/Ulk2/Ttl/Sema6d/Map1b/Mgll/Ptprs/Slit3/Rab21/Apoe/Sema6a/Sema3g/Ntn1/Smo/Trpv2/Clasp2/Zfyve27/Sema3b/Slc9a6/Slit2/L1cam/C9orf72/Dbn1/Sema7a/Sema5a/Ulk1/Ttc3/Plxna4/Usp9x/Limk1/Macf1/Olfm1/Cyfip1/Auts2/Eif2b2/Itgb1/Arhgap32/Eif4g2/Shtn1/Vcl/Sema6c/Sema4a/Sema3a/Mapt/Actr3/Myo5b	60
GO:0048659	smooth muscle cell proliferation	0.0154252	0.376238	2.11678e-12	3.32428e-11	Cdkn1a/Apod/Ogn/Pik3r1/Apln/Igfbp3/Ddr2/Egr1/Hmox1/Flt1/Bmp4/Igfbp5/Nampt/Calcrl/Bmpr1a/Il6ra/Prkca/Comt/Timp3/Nqo2/Cav1/Fgf2/Nppb/Trp53/Apoe/Mmp2/Tgfbr2/Foxj2/Myc/Thbs1/Efemp2/Dnmt1/Sf1/Camk2d/Tgfb1/Trib1/Il15/S1pr2/Igf1r/Akt1/Traf6/Zfp143/Ldlrap1/Fgf9/Mef2c/Tgfb3/Ndrg2/Mdm2/Ptk2/Ndrg4/Agt/Cx3cl1/Ptgir/Xrcc6/Igf1/Hpgd/Ace2/Naa35/Ppargc1a/Tnfaip3/Hmgcr/C3ar1/Akr1b1/P2ry6/Jun/Irak1/Pde1a/Ddit3/Pdg…	76
GO:0034446	substrate adhesion-dependent cell spreading	0.00974224	0.470588	2.13391e-12	3.33435e-11	Postn/Myadm/Nrp1/Fbln1/Dab2/Fn1/Parvg/Spry4/S100a10/Lamb1/Carmil1/Mertk/St6gal1/Antxr1/Calr/Parva/Lamc1/Sfrp1/Itgav/Tek/Enpp2/Cdc42/Flna/Bves/Dbn1/Lims1/Lims2/Ptk2/Lama5/Crkl/Micall2/P4hb/Prex1/Lamc2/Efna1/Coro1c/Nedd9/Dmtn/Pdpn/Vamp3/Pxn/Dock5/C1qbp/Lamb3/Fzd4/Peak1/Rhoa/Pkp2	48
GO:0051494	negative regulation of cytoskeleton organization	0.0140045	0.392045	2.30422e-12	3.58245e-11	Pik3r1/Lmod3/Myadm/Tmsb4x/Tmsb10/Arap1/Spta1/Mkks/Trim54/Clasp1/Ppfia1/Fkbp4/Twf2/Inpp5k/Coro1a/Dysf/Add3/Pfn2/Arhgap28/Carmil1/Map1b/Capn1/Nav3/Lmod2/Coro2b/Prkcd/Eps8/Cfl1/Kank3/Mtpn/Capza1/Clasp2/Ppp1r9a/Swap70/Apc2/Wasf2/Tmod3/Stmn2/Slit2/Ttbk2/Shroom2/Evl/Dbn1/Dyrk1a/Cav3/Prkn/Arfgef1/Hip1r/Tmod4/Inpp5j/Phldb2/Arhgap6/Pfn4/Capzb/Taok1/Stmn1/Tlr2/Dmtn/Pecam1/Sptb/Gas2l1/Mdm1/Nubp1/Tjp1/Atxn7/…	69
GO:0031334	positive regulation of protein-containing complex assembly	0.0160341	0.369159	2.45714e-12	3.8012e-11	Baiap2/Tfrc/Fscn1/Lcp1/Clu/Gbp2/Fnip2/Cdc42ep2/Mmp3/Bin1/Fas/Pfn2/Tppp3/Cdc42ep4/Carmil1/Trabd2b/Cav1/Map1b/Plcg2/Nav3/Tppp/Lmod2/Trp53/Rhoc/Creb1/Vasp/Med25/Bmf/Nck1/Gda/Crbn/Abca1/Mecp2/Atm/Tgfb1/Ptk2b/Trim65/Nckap1/Lgals3/Atat1/Bak1/Fchsd2/Dctn1/Mlst8/Evl/Nck2/Epn1/Mtln/Cdc42ep3/Snx9/Cav3/Nek7/Ajuba/Hip1r/Snap91/Grb2/Git1/Myo1c/Bcl2l11/Mapk9/Brcc3/Slf1/Cd24a/Gnl3l/Mapk8/Tirap/Mark4/Arl2/Cdk5ra…	79
GO:0042254	ribosome biogenesis	0.0215141	0.329193	2.52661e-12	3.88932e-11	Glul/Mettl16/Xpo1/Sbds/Sart1/Las1l/Eri1/Riok3/Trmt2b/LTO1/Rps27rt/Mpv17l2/Nop53/Tfb1m/Ngdn/Rpp25/Cul4b/Wdr43/Chd7/Zfp622/Gtpbp10/Suv39h1/Exosc5/Ddx56/Fau/Riox2/Gnl2/Tsc1/Nsun4/Ipo4/Malsu1/Nop14/Lsm6/Utp3/Nom1/Ltv1/Eif6/Rrs1/Dkc1/Abt1/Mrps2/Nat10/Npm3/Ddx17/Dimt1/Tsr3/Gtpbp4/Lsg1/Pop7/Nvl/Ddx27/Nob1/Dhx37/Sirt7/Fastkd2/Nop56/Utp20/Emg1/Mrm1/Rps9/Slx9/Utp6/Mdn1/Rsl1d1/Rpl10a/Heatr3/Mrm2/Rrp12/Sdad1…	106
GO:0006091	generation of precursor metabolites and energy	0.0292267	0.297521	2.54979e-12	3.90567e-11	Gnmt/Pcdh12/Nnt/Ak4/Adrb1/Adh1/Etfbkmt/Bnip3/Aldh1l1/Aldob/Hsd11b1/Rpia/Adgrf5/Trpv4/Gpd1/Afg1l/Taco1/Hmgcs2/Gabarapl1/Inpp5k/Sco1/Coq10b/Aldh1l2/Ogdhl/Lyrm7/Slc37a2/Pfkl/Dhtkd1/Gfpt1/Ddit4/Bdnf/Grb10/Cavin3/Slc25a13/Alox5/Cox10/Sdhaf4/Ppif/Phkg1/Phka1/Oxct1/Flcn/Mtfr1/Cyb5r4/C1qtnf2/Prps2/Tigar/Khk/Trp53/Nop53/Iscu/Nr1d1/Sorbs1/Myc/Ogt/Pnpt1/Irs2/Phkb/Atpsckmt/Insr/Rpe/Ndufaf1/Enox2/Jmjd8/Coa6/E…	144
GO:0045017	glycerolipid biosynthetic process	0.0162371	0.365297	3.36181e-12	5.12425e-11	Pik3r1/Chka/Pigg/Fabp5/Pnpla2/Itpkb/Ttc7/Pi4k2a/Efr3b/Acsl5/Socs3/Socs5/Pgap1/Cish/Pla2g5/Ptdss1/Fgf2/Plcg2/Tmem150a/Far1/Pigq/Selenoi/Uvrag/Agpat1/Dpm1/Pigs/Gpat3/Pgap2/Pcyt2/Crls1/Pik3c2b/Pyurf/Etnk1/Lpl/Smg1/Plscr1/Plce1/Pigu/Gpam/Gk/Ip6k1/Inppl1/Plpp1/Pigk/Dgat2/Socs2/Lpcat1/Pigw/Sirt1/Pgap3/Ajuba/Pigc/Ip6k2/Pla2g4a/Bpnt1/Ip6k3/Pigo/Lpin2/Pisd/Lpgat1/Itpkc/Ldlr/Cdipt/Gpat4/Atg14/Srebf1/Chpt1/…	80
GO:0010821	regulation of mitochondrion organization	0.0123808	0.412162	3.41209e-12	5.17551e-11	Bcl2l1/Tfrc/Bnip3/Kdr/Fas/Stat2/Irgm1/Oma1/Ppif/Flcn/Slc30a9/Mllt11/Tigar/Trp53/Pdcd5/Usp30/Bmf/Inf2/Fbxo7/Lmna/Fbxw7/Bok/Slc25a4/Mcu/Akt1/Arrb2/Bak1/Dhodh/Opa1/Prelid1/Prkn/Gclc/Hip1r/Clec16a/Psmd10/Sirt7/Igf1/Wdr35/Fis1/Pisd/Rap1gds1/Bcl2l11/Ppargc1a/Tnfsf10/Pink1/Fam162a/Parl/Dnm1l/Srebf1/Rala/Mul1/Slc35f6/Tmem135/Triap1/Dcn/Mapt/Cyrib/Gpx1/Fkbp8/Higd1a/Rhot1	61
GO:0018205	peptidyl-lysine modification	0.016643	0.361233	3.57499e-12	5.37022e-11	Lox/H1f2/Loxl2/Hdac9/Gata2/Etfbkmt/Klf15/Loxl1/Egr1/Crtc2/Morf4l1/Kmt2b/Nfya/Cth/Rasd2/P3h3/Eef1akmt1/Brd8dc/Yeats2/Ehmt2/Ezh1/Hdac2/Ogt/Atpsckmt/Smo/Rbbp5/Mecp2/Setd7/Suv39h1/Desi1/Gnl3/Plod1/Tgfb1/Smarca5/Setd1b/Mcrs1/Sae1/Atat1/Ruvbl2/Setd1a/Lipt2/Kansl3/Sirt2/Bag6/Sirt1/Kat14/Sirt4/Prkaa2/Baz1b/Msl3/Pias1/Crebbp/Sirt7/Smyd5/Myo1c/Kmt5a/Nelfe/Sumo2/Auts2/Pias4/Ahrr/Eef1akmt2/Msl1/Gnl3l/Kat8/Ub…	82
GO:0060538	skeletal muscle organ development	0.016643	0.361233	3.57499e-12	5.37022e-11	Hdac9/Lmod3/Heyl/Scx/Myh14/Selenon/Ankrd1/Meox2/Egr1/Maff/Xk/Ybx3/Bmal1/Eln/Dysf/Cyp26b1/Pmp22/Acta1/Fktn/Ephb1/Cacna1s/Cited2/Cav1/Cflar/Cdon/Des/Popdc3/Tcf21/Cntfr/Myc/Myoz2/Usp2/Bcl9l/Gtf3c5/Disp1/Hlf/Smo/Cav2/Rbfox1/Snhg15/Bcl2/Tgfb1/Med20/Lncpint/Dll1/Skil/Bves/Foxp2/Mef2c/Bin3/Myorg/Nr1d2/Hlx/Ddx17/Large1/Flnb/Naca/Hivep3/Fkrp/Psma6/Sap30/Mapk14/Klhl40/Hmgcr/Snw1/Vamp5/Ppp3cb/Smyd1/Kras/Dmd…	82
GO:0010823	negative regulation of mitochondrion organization	0.00649482	0.592593	3.63526e-12	5.43449e-11	Bcl2l1/Tfrc/Bnip3/Oma1/Ppif/Flcn/Tigar/Trp53/Usp30/Lmna/Bok/Slc25a4/Akt1/Arrb2/Bak1/Opa1/Prelid1/Prkn/Gclc/Clec16a/Psmd10/Igf1/Ppargc1a/Pink1/Parl/Dnm1l/Mul1/Slc35f6/Triap1/Mapt/Gpx1/Higd1a	32
GO:0034599	cellular response to oxidative stress	0.0174548	0.353909	3.86948e-12	5.75696e-11	Lcn2/Cyp1b1/Trp53inp1/Mgst1/Ddr2/Bnip3/Selenon/Sqstm1/Sphk1/Hmox1/Lrrk2/Foxo3/Bmal1/Nqo1/Mmp3/Bmp4/Alox5/Ermp1/Ppif/Sirpa/Mgat3/Pla2r1/Atf4/Capn1/Ercc6l2/Sod1/Mpv17l2/Trp53/Fut8/Mmp2/Prdx1/Hdac2/Pnpt1/Aqp1/Prkcd/Cfl1/Parp1/Tsc1/Sod3/Chuk/Atm/Gsr/Akt1/Pdk2/Agap3/Dhfr/Srxn1/Sirt2/Prkn/Mapkap1/Sirt1/Prkaa2/Ripk3/Prkra/Fyn/Ncoa7/Naglu/Etv5/Ccs/Rad52/Setx/Mapk9/Slc8a1/Ppargc1a/Pink1/Rnf146/Tnfaip3/Xbp…	86
GO:0030038	contractile actin filament bundle assembly	0.0105541	0.444444	4.19583e-12	6.18333e-11	Ccn2/Pik3r1/Actg1/Arap1/Nrp1/Mkks/Clasp1/Ppfia1/Inpp5k/Ppm1f/Asap3/Synpo2l/Eln/Arhgef15/S100a10/Pfn2/Arhgap28/Carmil1/Tnfaip1/Rgcc/Sorbs3/Rhoc/Wnt11/Coro2b/Sorbs1/Kank3/Lpar1/Clasp2/Tsc1/Ppp1r9a/Ptk2b/Itgb5/Wasf2/Cdc42/Zeb2/Limch1/Evl/Tgfb3/Rapgef3/Limk1/Phldb2/Arhgap6/Stmn1/Pxn/Smad3/Cd47/Arrb1/Rock2/Tjp1/Rhoa/Ccdc88a/Ttc8	52
GO:0043149	stress fiber assembly	0.0105541	0.444444	4.19583e-12	6.18333e-11	Ccn2/Pik3r1/Actg1/Arap1/Nrp1/Mkks/Clasp1/Ppfia1/Inpp5k/Ppm1f/Asap3/Synpo2l/Eln/Arhgef15/S100a10/Pfn2/Arhgap28/Carmil1/Tnfaip1/Rgcc/Sorbs3/Rhoc/Wnt11/Coro2b/Sorbs1/Kank3/Lpar1/Clasp2/Tsc1/Ppp1r9a/Ptk2b/Itgb5/Wasf2/Cdc42/Zeb2/Limch1/Evl/Tgfb3/Rapgef3/Limk1/Phldb2/Arhgap6/Stmn1/Pxn/Smad3/Cd47/Arrb1/Rock2/Tjp1/Rhoa/Ccdc88a/Ttc8	52
GO:0043414	macromolecule methylation	0.0162371	0.363636	4.40643e-12	6.46306e-11	H1f2/Etfbkmt/Trmt1l/Mtr/Prmt2/Mettl16/Tet1/Slc25a26/Rlf/Kmt2b/Hsd17b10/N6amt1/Hemk1/Eef1akmt1/Wdr6/Ehmt2/Mto1/Tfb1m/Pcif1/Larp7/Ezh1/Ogt/Trmt1/Rsl1/Trmt12/Dnmt1/Atpsckmt/Rbbp5/Mecp2/Setd7/Parp1/Suv39h1/Nsun4/Tyw3/Nsun2/Dnmt3a/Smarca5/Setd1b/Zmpste24/Prmt9/Mcrs1/Akt1/Setd1a/Mettl3/Rab3d/Kansl3/Dimt1/Prmt1/Mtrr/Smyd5/H19/Carm1/Emg1/Mrm1/Kmt5a/Nelfe/Auts2/Mettl4/Xbp1/Eef1akmt2/Thada/Mrm2/Trmt6/Thump…	80
GO:0031099	regeneration	0.0133956	0.39521	4.467e-12	6.52114e-11	Cdkn1a/Nrep/Ptprf/Ccnd1/Matn2/Ninj1/Selenon/Adam17/Hmox1/Gja1/Mtr/Lgr6/Cxcl12/Dysf/Ifrd1/Epha4/Fas/Bdnf/Cflar/Prrx1/Ptprs/Xylt1/Ace/Thy1/Mmp2/Ezh1/Plau/Mustn1/Snhg15/Bcl2/Rgma/Tgfb1/Dusp10/Igf1r/Flna/Hdgfl2/Map2k1/Yap1/Rtca/Dhfr/Bin3/Tec/Ulk1/Large1/Spaar/Vtn/Naca/Fkrp/Igf1/Cers2/Adm/P2rx5/Itpr1/Jun/Dmd/Pkm/Rtn4rl1/Sulf2/Kpna1/Cd9/Egfr/Med1/Scarf1/Gpx1/Ptgfrn/Rtn4rl2	66
GO:0048872	homeostasis of number of cells	0.0251674	0.309227	4.8978e-12	7.11328e-11	Tuba1a/Cd74/Fstl1/Col14a1/Gata2/Ets1/Bcl6/Adgrf5/Adam17/Spta1/Ptpn11/Itpkb/Ldb1/Hmox1/Adgrg1/Afdn/Jam3/Pde4b/Foxo3/Coro1a/Bmp4/Fas/Map7/Myct1/Zfp251/Spns2/Il20rb/Alas1/Ccr2/Xiap/Cdk5rap3/Cited2/Slc40a1/Ext1/Cflar/Sod1/Nppb/Mertk/Cfh/Septin4/Tspan9/Csf1r/Fosl2/Prdx1/Zfp36/Sox6/Casp3/Ezh1/Armcx1/Csf1/Lyn/Smo/Tmem14c/Dnaja3/Napepld/Bcl2/Tcirg1/Tgfb1/Ap3b1/Tmod3/Asxl1/Akt1/Gpam/Skil/P4htm/Bak1/Cdk6/S…	124
GO:0034250	positive regulation of amide metabolic process	0.0135985	0.391813	4.91837e-12	7.11328e-11	Tent5b/Cirbp/Cyp1b1/Rbm3/Clu/Vim/Rmnd1/Epha4/Csnk1e/Mpv17l2/Picalm/Tob1/Apoe/Niban1/Pcif1/Casp3/Ogt/Nck1/Thbs1/Prkcd/Dhx36/Nsun4/Akap6/Ptk2b/Cdk4/Eif2b5/Uhmk1/Cdk5rap1/Coa3/Sphk2/Eif6/Sh3bgrl/Nck2/Khdrbs1/Cpeb1/Mettl3/Nat10/Fxr2/Cnbp/Prmt1/Pym1/Larp4b/Abcg1/Efna1/Fastkd2/Erbb2/Impact/Mrps27/Abcf1/Pink1/Otud6b/Mettl14/Samd4/Eif3e/Eif4g2/C1qbp/Upf3b/Rock2/Fxr1/Bcl3/Rps6kb2/Pkm/Dhx9/Zcchc4/Rps27l/Yt…	67
GO:1903573	negative regulation of response to endoplasmic reticulum stress	0.00548001	0.658537	4.95814e-12	7.12021e-11	Bcl2l1/Ppp1r15a/Clu/Herpud1/Ddrgk1/Lrrk2/Alox5/Hyou1/Grina/Crebrf/Nck1/Abca7/Pdia6/Svip/Creb3l1/Txndc12/Sgta/Ubxn1/Nck2/Opa1/Prkn/Creb3/Xbp1/Usp14/Nr1h3/Selenos/Atf6b	27
GO:1901653	cellular response to peptide	0.0225289	0.320809	4.96896e-12	7.12021e-11	Ptprf/Pik3r1/Eif4ebp1/Hdac9/Vim/Lgmn/Ahsg/Vcam1/Sesn3/Stxbp4/Ptpn11/Gja1/Marcks/Inpp5k/Sco1/Epha4/Grb14/Grb10/Socs3/Prkca/Cav1/Appl1/Adrm1/Osbpl8/Trp53/Tns2/Slc2a8/Csk/Sorbs1/Ghr/Ogt/Nck1/Adcy6/Prkcd/Tbc1d4/Irs2/Cfl1/Eprs1/Lpl/Insr/Cav2/Nr3c2/Parp1/Pde3b/Csrp3/Ankrd26/Igf1r/Akt1/Gpam/Snx5/Map2k1/Pdk2/Timeless/Jak1/Inppl1/Rab31/Slc26a6/Socs2/Ptpra/Cpeb1/Opa1/C2cd5/Mdm2/Soga1/Ptk2/Leprotl1/Appl2/Si…	111
GO:0150116	regulation of cell-substrate junction organization	0.00750964	0.536232	5.03114e-12	7.17624e-11	Apod/Fam107a/Pik3r1/Actg1/Kdr/Nrp1/Dusp3/Gpm6b/Clasp1/Ptpn11/Ldb1/Myh9/Ppm1f/S100a10/Col16a1/Thy1/Mmp14/Cfl1/Clasp2/Tsc1/Dusp22/Tek/Enpp2/Limch1/Lims1/Ptpra/Ptk2/Phldb2/Macf1/Arhgap6/Coro1c/Dmtn/Smad3/Iqgap1/Peak1/Vcl/Epb41l5	37
GO:0036293	response to decreased oxygen levels	0.0184697	0.344697	5.07393e-12	7.17689e-11	Egln3/Hif3a/Eif4ebp1/Loxl2/Ak4/Bnip3/Kdr/Limd1/Adam17/Fndc1/Nos2/Egr1/Hmox1/Prmt2/Zfas1/Flt1/Epha4/Ddit4/Kcnk2/Kcnj11/Gata6/Cited2/Cav1/Rgcc/Hyou1/Fundc1/Tigar/Trp53/Nop53/Vegfc/Plat/Slc2a8/Ece1/Fosl2/Mmp2/Myc/Ogt/Aqp1/Plau/Kcnd2/Kcnk3/Mecp2/Camk2d/Suv39h1/Rest/Tsc1/Sod3/Cd38/Dnmt3a/Bcl2/Atm/Tgfb1/Rora/Tek/Akt1/Tm9sf4/Egln2/Map2k1/Daxx/Zeb2/Cr1l/Ptgis/Mlst8/Tgfb2/Tgfb3/Cpeb1/Wtip/Sirt2/Sirt1/P4hb…	91
GO:0043491	phosphatidylinositol 3-kinase/protein kinase B signal transduction	0.0211082	0.328076	5.10798e-12	7.17689e-11	Lox/Sesn1/Pik3r1/Xdh/Ddr2/Unc5b/Rcn3/Akr1c14/Kdr/Ret/Sesn3/Fn1/Cxcl12/Inpp5k/Sco1/Flt1/Dipk2a/Mmp3/Igfbp5/Cavin3/Flcn/Plxnb1/Rasd2/Fgf2/Btbd10/Osbpl8/Mertk/Vav3/Nop53/Csf1r/Them4/Hdac2/Thbs1/Pik3ip1/Irs2/Reln/Pik3c2b/Insr/Clcf1/Pde3b/Tgfb1/Ppp1r16b/Igf1r/Tek/Akt1/Arrb2/Cdc42/Gcnt2/Phlda3/Pear1/Kbtbd2/Rubcn/Stk3/Tgfb2/Myorg/Sema5a/Angpt1/Rapgef3/Ptk2/Ror1/Cav3/Itsn1/Sirt1/Rapgef1/Arfgef1/Pdcd6/Obs…	104
GO:0008360	regulation of cell shape	0.0119748	0.415493	5.12392e-12	7.17689e-11	Baiap2/Arhgap18/Sh3kbp1/Fblim1/Fgd4/Kdr/Myh14/Arap1/Limd1/Spta1/Plxnd1/Fn1/Myh9/Coro1a/Cdc42ep2/Plxnb3/Cdc42ep4/Strip2/Plxnb1/P2ry1/Csf1r/Gas7/Parva/Plxna1/Eps8/Cfl1/Lpar1/Plxnc1/Ptk2b/Epb41l2/Fmnl1/Rhou/Zmpste24/Syne3/Palm/Bves/Epb41/Cdc42ep3/Hexb/Bambi/Ptk2/Palmd/Myh10/Plxna4/Rhoq/Fyn/Cyfip1/Dmtn/Pdpn/Wdr1/Pxn/Prpf40a/Epb41l3/Rhoj/Cfdp1/Cfap410/Kif3a/Sema4a/Fmnl2	59
GO:0032434	regulation of proteasomal ubiquitin-dependent protein catabolic process	0.0119748	0.415493	5.12392e-12	7.17689e-11	Clu/Herpud1/Rnf144b/Ddrgk1/Dab2/Lrrk2/Arih2/Nub1/Xpo1/Rnf144a/Csnk1e/Socs5/Cav1/Nop53/Ogt/Rnf19b/Bbs7/Uchl5/Svip/Desi1/Rchy1/Trib1/Plk2/Dda1/Glmn/Trib2/Akt1/Sgta/Ubxn1/Mdm2/Sirt2/Bag6/Prkn/Eif3h/Gclc/Clec16a/Usp9x/Ube2v2/Pias1/Psmd10/Sh3rf1/Bag5/Sumo2/Il33/Mapk9/Gabarap/Chfr/Klhl40/Usp14/Mapk8/Zyg11b/Tlk2/Ubqln2/Zer1/Commd1/Cop1/Cbfa2t3/Sh3rf2/Ankib1	59
GO:0032436	positive regulation of proteasomal ubiquitin-dependent protein catabolic process	0.00893038	0.483516	5.47598e-12	7.63562e-11	Clu/Herpud1/Rnf144b/Ddrgk1/Dab2/Lrrk2/Arih2/Nub1/Rnf144a/Csnk1e/Socs5/Cav1/Nop53/Rnf19b/Bbs7/Rchy1/Trib1/Plk2/Dda1/Trib2/Akt1/Sgta/Mdm2/Sirt2/Prkn/Gclc/Ube2v2/Pias1/Psmd10/Sh3rf1/Sumo2/Il33/Mapk9/Gabarap/Chfr/Klhl40/Mapk8/Zyg11b/Ubqln2/Zer1/Cop1/Cbfa2t3/Sh3rf2/Ankib1	44
GO:0070372	regulation of ERK1 and ERK2 cascade	0.022326	0.3207	6.33657e-12	8.79616e-11	Ccn2/Cd74/Emilin1/Kdr/Acta2/Akap12/Nrp1/Adam17/Dusp3/Errfi1/Ptpn11/Dnajc27/Fbln1/Dusp6/Dab2/Fn1/Ptprc/Trpv4/Cxcl12/Myh9/Bmp4/Epha4/Ngf/Cavin3/Fgfr3/Ephb1/Prkca/Spred2/Sirpa/Cnksr3/Dusp1/Tbc1d10c/Flcn/Timp3/Nqo2/Pla2g5/Cav1/Cflar/Fgf2/Synj2bp/Apoe/P2ry1/Csf1r/Ece1/Csk/Gpnmb/Wnk2/Sema6a/Abca7/Lyn/Camk2d/Clcf1/Fbxw7/Apip/Fgf18/Ankrd26/Tgfb1/Dusp10/Ptk2b/Glipr2/Ranbp9/Tek/Arrb2/Spred1/Gcnt2/Map2k1/E1…	110
GO:0046700	heterocycle catabolic process	0.0271971	0.300448	6.80409e-12	9.39222e-11	Tent5b/Cirbp/Xdh/Gsta3/Csdc2/Ahcy/Igfbp3/Tent5a/Vim/Pde4a/Ncbp2/Hmox1/Mettl16/Tnrc6a/Tet1/Caprin1/Nudt12/Dut/Nudt16/Nudt4/Nt5c1a/Ahcyl/Brf1/Pon3/Dffa/Skic2/Nudt15/Supv3l1/Wdr82/Ago4/Nt5e/Tob1/Zpr1/Nudt5/Dpyd/Dcp2/Cidea/Cdadc1/Trir/Zfp36/Pan2/Skic3/Rida/Entpd5/Pnpt1/Entpd1/Gda/Lrpprc/Dhx36/Exosc5/Hnmt/Smg1/Pde5a/Adal/Nsun2/Atm/Pcbp4/Phax/Nt5c3/Ybx2/Lsm6/Entpd2/Hnrnpc/Galt/Dkc1/Sidt2/Nudt1/Mettl3/Z…	134
GO:2000060	positive regulation of ubiquitin-dependent protein catabolic process	0.0099452	0.453704	6.82637e-12	9.39222e-11	Clu/Herpud1/Rnf144b/Ddrgk1/Dab2/Lrrk2/Arih2/Nub1/Rnf144a/Csnk1e/Socs5/Tgfb1i1/Cav1/Nop53/Rnf19b/Bbs7/Fbxw7/Rchy1/Trib1/Ptk2b/Plk2/Dda1/Trib2/Akt1/Sgta/Mdm2/Ptk2/Sirt2/Prkn/Gclc/Ube2v2/Pias1/Psmd10/Sh3rf1/Sumo2/Il33/Mapk9/Gabarap/Chfr/Klhl40/Mapk8/Zyg11b/L3mbtl3/Ubqln2/Zer1/Cop1/Cbfa2t3/Sh3rf2/Ankib1	49
GO:0018105	peptidyl-serine phosphorylation	0.0217171	0.323263	7.08261e-12	9.70185e-11	Tfrc/Rps6ka2/Ppp1r15a/Mknk2/Wnk1/Ret/Lrrk2/Wnt5a/Inpp5k/Fnip2/Ppm1f/Ggnbp2/Csnk1e/Ngf/Sbk1/Bdnf/Hipk1/Irgm1/Dclk1/Pfn2/Prkca/Ulk2/Cnksr3/Rps6ka5/Cav1/Sgk3/Vrk1/Stk38l/Mapkapk3/Pnck/Tgfbr2/Ogt/Nck1/Prkcd/Sh2d3c/Gpd1l/Camk2d/Smg1/Chuk/Bcl2/Atm/Tgfb1/Plk2/Epm2a/Mast3/Tek/Akt1/Nlk/Arrb2/Pdk2/Ttbk2/Uhmk1/Bak1/Top1/Dyrk1a/Smad7/Nck2/Angpt1/Mast2/Ulk1/Hrc/Srpk1/Mapkap1/Dock7/Nek7/Tnks1bp1/Csnk2a1/Ip6k2/…	107
GO:0031330	negative regulation of cellular catabolic process	0.0148163	0.374359	7.55635e-12	1.03054e-10	Tent5b/Cirbp/Tent5a/Etfbkmt/Wnk1/Timp4/Hmox1/Lrrk2/Mettl16/Anxa2/Nampt/Qsox1/Dap/Dffa/Washc1/Timp3/Furin/Tigar/Trp53/Tob1/Wdr6/Ehmt2/Stk38l/Usp30/Zfp36/Bmf/Mcl1/Lrpprc/Dhx36/Ptpn3/Rragc/Tsc1/Nsun2/Bcl2/Phax/Ybx2/Akt1/Golga2/Hnrnpc/Rubcn/Mlst8/Dkc1/Nrbp2/Fez2/Ptk2/Sirt2/Larp4b/Clec16a/Timp2/Parn/Mtmr2/Slc7a5/Pink1/Noct/Tnfaip3/Nrde2/Acacb/Igf2bp2/Nmnat1/Tirap/Nbas/Srsf1/Eif4g2/Eif4enif1/Klhl22/Dhx…	73
GO:0046578	regulation of Ras protein signal transduction	0.0150193	0.371859	7.94903e-12	1.07936e-10	Col3a1/Bcl6/Nrp1/Psd3/Itpkb/Adgrg1/Synpo2l/Abra/Ngf/Spry4/Cyth4/Syde2/Arhgdib/Tnfaip1/Flcn/Apoe/Lpar6/Cyth2/Ogt/Eps8/Csf1/Lpar1/Abca1/Eps8l1/Camk2d/Plce1/Heg1/Ssx2ip/Ripor2/Scai/Map2k1/Stard13/Arfgef2/Gpr17/Tgfb2/Cyth1/Gpr4/Dennd4b/Tns3/Mapkap1/Rapgef1/Arfgef1/Dennd1a/Timp2/Iqsec3/Kbtbd7/Git1/Igf1/Erbb2/Mcf2l/Arhgef28/Auts2/Stmn1/Stk19/Gabarap/Myo9b/Cdh2/Itgb1/Kras/Arrb1/Rasa2/Arhgap44/Sos1/Arhga…	74
GO:0001836	release of cytochrome c from mitochondria	0.00730668	0.537313	9.00119e-12	1.21691e-10	Bcl2l1/Bnip3/Fas/Ppif/Mllt11/Trp53/Pdcd5/Bmf/Mcl1/Lmna/Bok/Bcl2/Sfn/Akt1/Arrb2/Bak1/Opa1/Prelid1/Prkn/Psmd10/Igf1/Wdr35/Fis1/Bcl2l11/Mapk9/Tnfsf10/Pink1/Fam162a/Parl/Dnm1l/Jun/Ggct/Triap1/Sod2/Gpx1/Higd1a	36
GO:0033674	positive regulation of kinase activity	0.0261823	0.302817	9.22437e-12	1.24168e-10	Cdkn1a/Cd74/Ccnd1/Fgd4/Ddr2/Clu/Kdr/Ccnd2/Ret/Adam17/Mmd/Tcim/Egr1/Ptprc/Lrrk2/Marcks/Fbn1/Wnt5a/Flt1/Dipk2a/Epha4/Fgfr3/Irgm1/Il6ra/Rgcc/Fgf2/Osbpl8/Mertk/Tigar/Vegfc/Magi3/Dok7/Ace/Map2k6/Csf1r/Csk/Ghr/Taok3/Thbs1/Prkcd/Agap2/Csf1/Lyn/Reln/Zfp622/Insr/Abi2/Pde5a/Fbxw7/Ppp1r9a/Akap6/Fgf18/Dlg4/Wdr59/Tgfb1/Ptk2b/Fgd2/Map2k3/Etaa1/Igf1r/Map4k2/Tek/Akt1/Prlr/Arrb2/Traf6/Map2k1/Daxx/Zeb2/Cdk5rap1/Me…	129
GO:0007519	skeletal muscle tissue development	0.0158311	0.362791	9.27767e-12	1.24348e-10	Hdac9/Lmod3/Heyl/Scx/Myh14/Selenon/Ankrd1/Meox2/Egr1/Maff/Xk/Ybx3/Bmal1/Eln/Dysf/Cyp26b1/Pmp22/Acta1/Fktn/Ephb1/Cacna1s/Cited2/Cav1/Cflar/Cdon/Popdc3/Tcf21/Myc/Myoz2/Usp2/Bcl9l/Gtf3c5/Hlf/Smo/Cav2/Rbfox1/Snhg15/Bcl2/Tgfb1/Med20/Lncpint/Dll1/Skil/Bves/Foxp2/Mef2c/Bin3/Myorg/Nr1d2/Hlx/Ddx17/Large1/Flnb/Naca/Hivep3/Fkrp/Psma6/Sap30/Mapk14/Klhl40/Hmgcr/Snw1/Vamp5/Ppp3cb/Smyd1/Kras/Dmd/Mbnl1/Prkaa1/Rc…	78
GO:0048813	dendrite morphogenesis	0.0146134	0.375	9.53643e-12	1.27267e-10	Ptprf/Baiap2/Fbxo31/Eef2k/Cux2/Nrp1/Kalrn/Lrrk2/Marcks/Wnt5a/Afdn/Tet1/Caprin1/Hecw2/Epha4/Dclk1/Adam10/Ephb1/Rab21/Picalm/Rap2a/Trak2/Obsl1/Dhx36/Cfl1/Reln/Dnm3/Abi2/Dtnbp1/Tnik/Numb/Wls/Ppp1r9a/Rere/Dlg4/Cdc42/Sdc2/Abitram/Dbn1/Opa1/Abi3bp/Ywhah/Dact1/Nsmf/Ptprd/Efna1/Fyn/Map6/Stk11/Nfatc4/Trak1/Camk2a/Dnm1l/Caprin2/Lrp4/Mapk8/Actr2/Ache/Itgb1/Prmt3/Fzd4/Klf7/Rock2/Ankrd27/Arhgap44/Bhlhb9/Sema3…	72
GO:0031668	cellular response to extracellular stimulus	0.0186726	0.339483	1.02301e-11	1.35942e-10	Cdkn1a/Fam107a/Itga6/Tfrc/Sesn1/Postn/Glul/Chka/Alb/Vcam1/Sesn3/Plin3/Ptprc/Lrrk2/Gabarapl1/Tnrc6a/Map1lc3b/Dsc2/Rnf152/Fas/Bmp6/Comt/Dap/Flcn/Gpr155/Atf4/Kcnb1/Sipa1/Trp53/Castor1/Wdr45/Ehmt2/Gsdmd/Bmf/Ogt/Pik3c2b/Rragc/Lpl/Suv39h1/Tsc1/Scd4/Bcl2/Wdr59/Map1lc3a/Gabarapl2/Mios/Prkab2/Pdk2/Mlst8/Ywhaz/Klf10/Nudt1/Ulk1/Snai2/Atg5/Rnf167/Kptn/Mapkap1/Sirt1/Prkaa2/Clec16a/Mtmr3/Crebbp/Impact/Gcn1/Slc…	92
GO:0031669	cellular response to nutrient levels	0.0170489	0.351464	1.03866e-11	1.37433e-10	Cdkn1a/Fam107a/Sesn1/Postn/Glul/Chka/Alb/Sesn3/Plin3/Lrrk2/Gabarapl1/Tnrc6a/Map1lc3b/Dsc2/Rnf152/Fas/Comt/Dap/Flcn/Gpr155/Atf4/Kcnb1/Trp53/Castor1/Wdr45/Ehmt2/Bmf/Ogt/Pik3c2b/Rragc/Lpl/Suv39h1/Tsc1/Scd4/Bcl2/Wdr59/Map1lc3a/Gabarapl2/Mios/Prkab2/Pdk2/Mlst8/Ywhaz/Klf10/Ulk1/Snai2/Atg5/Rnf167/Kptn/Mapkap1/Sirt1/Prkaa2/Clec16a/Mtmr3/Crebbp/Impact/Gcn1/Slc2a1/Gabarap/Xbp1/Atg14/Srebf1/Wrn/Pim1/Snw1/Ma…	84
GO:0007254	JNK cascade	0.0140045	0.381215	1.06295e-11	1.40051e-10	Ccn2/Fgd4/Dusp3/Dab2/Lrrk2/Trpv4/Wnt5a/Zfp110/Eda2r/Per1/Fktn/Ephb1/Sirpa/Dixdc1/Rap2a/Gps2/Aida/Klhl31/Dnaja1/Taok3/Zfp622/Sfrp1/Tnik/Dusp10/Trib1/Ptk2b/Tlr3/Igf1r/Dusp22/Nppa/Map4k2/Akt1/Traf6/Cdc42/Daxx/Lmnb1/Stk3/Ptk2/Prmt1/Ltbr/Gadd45b/Rapgef1/Dact1/Tnfrsf19/Dusp16/Sh3rf1/Mturn/Taok1/Mapk9/Smad3/Card9/Cops5/Mapk8/Rassf2/Map3k20/Tirap/Hacd3/Mapk8ip1/Traf4/Irak1/Mdfic/Stradb/Egfr/Gstp2/Sh3rf2/…	69
GO:0071375	cellular response to peptide hormone stimulus	0.0198904	0.331081	1.14996e-11	1.50876e-10	Ptprf/Pik3r1/Eif4ebp1/Hdac9/Ahsg/Sesn3/Stxbp4/Ptpn11/Marcks/Inpp5k/Sco1/Grb14/Grb10/Socs3/Prkca/Cav1/Appl1/Adrm1/Osbpl8/Tns2/Slc2a8/Csk/Sorbs1/Ghr/Ogt/Nck1/Adcy6/Prkcd/Tbc1d4/Irs2/Cfl1/Eprs1/Lpl/Insr/Cav2/Nr3c2/Parp1/Pde3b/Csrp3/Ankrd26/Igf1r/Akt1/Gpam/Snx5/Map2k1/Pdk2/Jak1/Inppl1/Rab31/Slc26a6/Socs2/Ptpra/Cpeb1/Opa1/C2cd5/Soga1/Ptk2/Leprotl1/Appl2/Sirt1/Rhoq/Agt/Zbtb7b/Eif4ebp2/Grb2/Lpin2/Irf1/I…	98
GO:0043535	regulation of blood vessel endothelial cell migration	0.00913335	0.46875	1.22016e-11	1.59414e-10	Hdac9/Gata2/Ets1/Kdr/Nrp1/Adam17/Meox2/Prcp/Hmox1/Vash1/Amot/Prkca/Rgcc/Fgf2/Dll4/Col18a1/Vegfc/Apoe/Srpx2/Thbs1/Mecp2/Fbxw7/Fgf18/Tgfb1/Plk2/Map2k3/Akt1/Spred1/Stard13/Mef2c/Angpt2/Angpt1/Sirt1/Efna1/Igf1/Csnk2b/Akt3/Stat5a/Rhoj/Rhoa/Amotl1/Nf1/Plcg1/Mmrn2/Gadd45a	45
GO:0019439	aromatic compound catabolic process	0.0280089	0.295503	1.23975e-11	1.61296e-10	Tent5b/Cirbp/Xdh/Csdc2/Ahcy/Igfbp3/Tent5a/Fah/Vim/Pde4a/Ncbp2/Hmox1/Mettl16/Tnrc6a/Tet1/Caprin1/Nudt12/Dut/Nudt16/Nudt4/Nt5c1a/Ahcyl/Brf1/Pon3/Comt/Dffa/Skic2/Nudt15/Supv3l1/Wdr82/Ago4/Nt5e/Tob1/Zpr1/Nudt5/Dpyd/Dcp2/Cidea/Cdadc1/Trir/Zfp36/Pan2/Skic3/Rida/Entpd5/Pnpt1/Entpd1/Gda/Lrpprc/Dhx36/Exosc5/Hnmt/Smg1/Pde5a/Adal/Nsun2/Atm/Pcbp4/Phax/Nt5c3/Ybx2/Lsm6/Entpd2/Hnrnpc/Galt/Dkc1/Sidt2/Nudt1/Mettl…	138
GO:0140694	non-membrane-bounded organelle assembly	0.0249645	0.30597	1.30644e-11	1.69265e-10	Myh7/Fscn1/Cirbp/Lcp1/Lmod3/Wnk1/Actg1/Limd1/Myom2/Ccdc69/Clasp1/Xirp1/Caprin1/Ankrd23/Synpo2l/Sbds/Acta1/Cenpc1/Spice1/Actc1/Washc1/Casq1/Tubb5/Cflar/Cep97/Mpv17l2/Wdr62/Lmod2/Nop53/Cenpj/Pgm5/Hdac2/Mis12/Myoz2/Nrap/Tnnt2/C2cd3/Cntrob/Fau/Aup1/Clasp2/Nsun4/Snhg15/G3bp1/Tubgcp5/Ogfod1/Csrp3/Stard9/Chmp6/Plk2/Tmod3/Casq2/Ripor2/Golga2/Flna/Ldaf1/C9orf72/Mef2c/Eif6/Rrs1/Abt1/Smc1a/Mrps2/Csrp2/Dazap…	123
GO:1901875	positive regulation of post-translational protein modification	0.0138015	0.382022	1.33627e-11	1.72075e-10	Fam107a/Dcun1d2/Egr1/Sphk1/Lrrk2/Ngf/Ubb/Fgfr3/Xiap/Cdk5rap3/Ube2n/Cav1/Rasd2/Nop53/Septin4/Ogt/Cblb/Dnaja3/Suv39h1/Gnl3/Fbxw7/Rchy1/Tgfb1/Trib1/Smarca5/Trib2/Mcrs1/Sae1/Arrdc3/Angpt1/Ube2d1/Sprtn/Kansl3/Prkn/Sirt1/Baz1b/Ndfip2/Pdcd6/Ube2v2/Rnf40/Pias1/Psmd10/Myo1c/Nelfe/Sumo2/Auts2/Mapk9/Gabarap/Ube2l3/Pias4/Ahrr/Xbp1/Chfr/Klhl40/Rassf1/Kat8/Mapk8/Arrb1/Pttg1ip/Mul1/Cry1/Arrdc4/Commd1/Phf20/Btrc…	68
GO:0031503	protein-containing complex localization	0.0172519	0.348361	1.3392e-11	1.72075e-10	Ift122/Nacc2/Tnfaip2/Fkbp4/Kalrn/Xpo1/Kif5c/Adam22/Ift81/Intu/Dynll1/Ndc1/Adam10/Ift80/Sacm1l/Gpc6/Ttc21b/Exoc3l/Tspan9/Tamalin/Efnb2/Lgi1/Ogt/Sgcd/Rapgef4/Reln/Dnm3/Ift20/Lmnb2/Lpar1/Lmna/Tnik/Numb/Akap6/Ift70a1/Atm/Dlg4/Cep131/Ssx2ip/Mios/Map2k1/Tyrobp/Lmnb1/Ltv1/Eif6/Dbn1/Smad7/Ift46/Gsg1l/Sirt2/Cilk1/Lsg1/Lca5/Grip2/Git1/Ift70b/Erbb2/Wdr35/Ift43/Gpc4/Mdn1/Ift74/Dync2li1/Camk2a/Ift57/Sdad1/Hip…	85
GO:0030308	negative regulation of cell growth	0.0152222	0.365854	1.44378e-11	1.84749e-10	Cdkn1a/Pi16/Sesn1/Cirbp/Sema3c/Mndal/Fstl4/Bcl6/Nrp1/Ahsg/Tspyl2/Gas1/Gja1/Dab2/Sema6b/Rgs4/Wnt5a/Sox17/Ifrd1/Ulk2/Sema6d/Adipor2/Cth/Nppb/Ptprs/Slit3/Fhl1/Trp53/Dact3/Wnt11/Sema6a/Sema3g/Ntn1/Cfl1/Mecp2/Sfrp1/Bcl2/Rgma/Sema3b/Tgfb1/Nppa/Crlf3/Slit2/Epha7/Sphk2/Cdkn2d/Tgfb2/Osgin1/Sema7a/Sema5a/Ctdp1/Ulk1/Vgll4/Cav3/Sertad1/Ttc3/Sh3bp4/Ip6k2/Agt/Tchp/Nme6/Stk11/Caprin2/Smad3/Osgin2/Gas2l1/Mul1/Rr…	75
GO:0009314	response to radiation	0.0263852	0.300231	1.47426e-11	1.87876e-10	Cdkn1a/Col3a1/Bcl2l1/Tuba1a/Cirbp/Pik3r1/Trp53inp1/Ccnd1/Ints7/Ccnd2/Nek1/Egr1/Ptprc/Mme/Mmp3/Per1/Uvssa/Cry2/Ext1/Ercc1/Tigar/Hus1/Ap1s2/Trp53/Xrcc2/Creb1/Mmp2/Myc/Casp3/Bmf/Xpc/Fbxl3/Cul4b/Aqp1/Abca7/Prkcd/Rev1/Usp2/Dhx36/Ift20/Atxn1/Mecp2/Parp1/Sfrp1/Hmgn1/Fbxw7/Bcl2/Atm/Tgfb1/Zmpste24/Akt1/Swi5/Ric8a/Yap1/Per2/Nabp2/Ruvbl2/Bak1/Agap3/Mapk11/Rhbdd1/Lig4/Cdkn2d/Atp8a2/Sema5a/Mettl3/Uaca/Mdm2/Sn…	130
GO:0001818	negative regulation of cytokine production	0.0207023	0.324841	1.57487e-11	1.99415e-10	Apod/Cd34/Chid1/Hdac9/Bcl6/Twsg1/Adcy7/Errfi1/Ptpn11/Hmox1/Fbln1/Fn1/Ptprc/Flt1/Ssc5d/Xaf1/Irgm1/Socs5/Il20rb/Irak3/Sirpa/Cd200/Gata6/Furin/Rgcc/Ptprs/Mertk/Nav3/Cidea/Csk/Gpnmb/Wnt11/Zfp36/Casp3/Cd2ap/Thbs1/Cd276/Nploc4/Parp1/Laptm4b/Ddx56/Anxa4/Lbp/Tgfb1/Dll1/Trib2/Tnfrsf21/Arrb2/Tyrobp/Srgn/Oas1b/Tgfb2/Smad7/Tgfb3/Angpt1/Ndrg2/Cd274/Atg5/Appl2/Sirt1/Prg4/Cx3cl1/Tia1/Ptpn6/Crebbp/Git1/Igf1/Rad2…	102
GO:0051235	maintenance of location	0.0235437	0.310992	1.57763e-11	1.99415e-10	Tmsb4x/Tmsb10/Alb/Selenon/Ltbp1/Pnpla2/Tmem38b/Ces1d/Gja1/Plin3/Twf2/Ptprc/Kdelr3/Fbn1/Tnrc6a/Ibtk/Coro1a/Dysf/Gp1ba/Ngf/Stard4/Nfkbia/Os9/Cacna1s/Cry2/Get4/Casq1/Cav1/Fgf2/Osbpl8/Plcg2/Plcd1/Nfkbib/Nrros/Apoe/Cidea/Uvrag/Thy1/Mest/Adcy6/Kdelr2/Ehd1/Ank2/Chd7/Plcb4/Grik5/Lyn/Myzap/Lpl/Camk2d/Aup1/Ldah/Akap6/Tgfb1/Arhgap21/Ptk2b/Itgav/Plce1/Casq2/Asxl1/Akt1/Flna/Ldaf1/Srgn/Fth1/Tgfb2/Dbn1/Dgat2/Mt…	116
GO:2000058	regulation of ubiquitin-dependent protein catabolic process	0.0135985	0.382857	1.67904e-11	2.11374e-10	Clu/Herpud1/Rnf144b/Ddrgk1/Dab2/Lrrk2/Arih2/Nub1/Xpo1/Rnf144a/Csnk1e/Socs5/Tgfb1i1/Cav1/Nop53/Ogt/Rnf19b/Tmem168/Bbs7/Uchl5/Svip/Desi1/Fbxw7/Rchy1/Trib1/Ptk2b/Plk2/Dda1/Glmn/Trib2/Akt1/Sgta/Ubxn1/Mdm2/Anks1/Ptk2/Sirt2/Bag6/Prkn/Eif3h/Gclc/Clec16a/Usp9x/Ube2v2/Pias1/Psmd10/Sh3rf1/Bag5/Sumo2/Il33/Mapk9/Gabarap/Chfr/Klhl40/Pdcl3/Usp14/Mapk8/Zyg11b/L3mbtl3/Tlk2/Ubqln2/Zer1/Commd1/Cop1/Cbfa2t3/Sh3rf2/…	67
GO:1901361	organic cyclic compound catabolic process	0.0290237	0.291242	1.70305e-11	2.12874e-10	Tent5b/Cirbp/Xdh/Gsta3/Csdc2/Ahcy/Igfbp3/Tent5a/Fah/Vim/Hsd11b1/Pde4a/Ncbp2/Hmox1/Mettl16/Tnrc6a/Tet1/Caprin1/Nudt12/Dut/Nudt16/Nudt4/Nt5c1a/Ahcyl/Brf1/Pon3/Comt/Dffa/Skic2/Nudt15/Supv3l1/Wdr82/Cyp27a1/Ago4/Nt5e/Tob1/Zpr1/Nudt5/Dpyd/Apoe/Dcp2/Cidea/Cdadc1/Trir/Zfp36/Pan2/Skic3/Rida/Entpd5/Pnpt1/Entpd1/Gda/Lrpprc/Dhx36/Exosc5/Hnmt/Smg1/Pde5a/Adal/Nsun2/Atm/Pcbp4/Phax/Nt5c3/Ybx2/Lsm6/Entpd2/Hnrnpc/…	143
GO:2001234	negative regulation of apoptotic signaling pathway	0.0176578	0.343874	1.70465e-11	2.12874e-10	Bcl2l1/Itga6/Cd74/Unc5b/Pea15a/Clu/Herpud1/Nrp1/Gas1/Hmox1/Dab2/Lrrk2/Cxcl12/Ybx3/Tmbim1/Bmp4/Uri1/Bdnf/Ppif/Atf4/Cflar/Cth/Hyou1/Grina/Sgk3/Gclm/Bmf/Hdac2/Mcl1/Dnaja1/Fbxo7/Agap2/Igbp1/Lmna/Bok/Bcl2/Creb3l1/Itgav/Txndc12/Slc25a4/Akt1/Arrb2/Lgals3/Map2k1/Mnt/Yap1/Bak1/Cdkn2d/Opa1/Mdm2/Snai2/Prelid1/Ctnna1/Prkn/Sirt1/Gclc/Cx3cl1/Psmd10/Fyn/Igf1/Sh3rf1/Bag5/Mrtfa/Creb3/Pink1/Tnfaip3/Parl/Eya2/Xbp1/…	87
GO:0001936	regulation of endothelial cell proliferation	0.0123808	0.398693	1.83639e-11	2.28408e-10	Xdh/Apln/Sparc/Gata2/Kdr/Adam17/Atoh8/Lrg1/Hmox1/Gja1/Cxcl12/Wnt5a/Flt1/Vash1/Aldh1a2/Dysf/Bmp4/Plxnb3/Bmp6/Sulf1/Alox5/Fgfr3/Prkca/Cav1/Rgcc/Fgf2/Dll4/Col18a1/Synj2bp/Hspg2/Vegfc/Apoe/Aggf1/Thbs1/Cav2/Slc39a9/Ppp1r16b/Tek/Akt1/Mef2c/Sema5a/Stat1/Sirt1/Aimp1/Col4a3/Pdcd6/Igf1/Thbs4/Akt3/Pdcl3/Stat5a/Emc10/Jun/Nras/Mydgf/Tie1/Zfp580/Nf1/Krit1/Plcg1/Mmrn2	61
GO:0030307	positive regulation of cell growth	0.0154252	0.361905	1.95214e-11	2.40879e-10	Adrb1/Tnfrsf12a/Nrp1/Adam17/Sphk1/Cxcl16/Fn1/Twf2/Cxcl12/Wnt5a/Nr3c1/Afdn/Ngf/Bdnf/Adam10/Map1b/N6amt1/Supv3l1/Picalm/Apoe/Lgi1/Mmp14/Ntn1/Cfl1/Smarcb1/Trpv2/Mecp2/Mtpn/Sfrp1/Cd38/Zfyve27/Akap6/Bcl2/Ptk2b/Sfn/Slc25a4/Akt1/Cdc42/Hdgfl2/Yap1/L1cam/Trip10/Mlst8/Tgfb2/Dbn1/Smad7/Sema7a/Sema5a/Ptk2/Prkn/Mapkap1/Sirt1/Limk1/Macf1/Psmd10/Igf1/Erbb2/Cyfip1/Eif2b2/Unc13a/Tead1/Extl3/Arhgap32/Eif4g2/Exosc2…	76
GO:0070302	regulation of stress-activated protein kinase signaling cascade	0.0154252	0.361905	1.95214e-11	2.40879e-10	Ccn2/Xdh/Fgd4/Dusp3/Sphk1/Dab2/Trpv4/Wnt5a/Zfp110/Bmp4/Fas/Eda2r/Per1/Fktn/Ephb1/Ccr2/Sirpa/Dusp1/Dixdc1/Rap2a/Gps2/Prdx1/Aida/Klhl31/Dnaja1/Taok3/Lyn/Zfp622/Sfrp1/Tnik/Dusp10/Ptk2b/Tlr3/Igf1r/Zmpste24/Dusp22/Nppa/Map4k2/Akt1/Cdc42/Map2k1/Lmnb1/Stk3/Tgfb2/Prmt1/Ltbr/Gadd45b/Cav3/Rapgef1/Dact1/Tnfrsf19/Dusp16/Sh3rf1/Mturn/Taok1/Mapk9/Hmgcr/Card9/Cops5/Rassf2/Map3k20/Tirap/Arl6ip5/Mapk8ip1/Traf4/Ma…	76
GO:0001952	regulation of cell-matrix adhesion	0.01096	0.421875	1.9804e-11	2.43399e-10	Apod/Fam107a/Postn/Pik3r1/Actg1/Ninj1/Bcl6/Kdr/Nrp1/Dusp3/Gpm6b/Clasp1/Ptpn11/Ldb1/Myh9/Ppm1f/S100a10/Col16a1/Acer2/Thy1/Mmp14/Thbs1/Efemp2/Plau/Csf1/Cfl1/Clasp2/Tsc1/Bcl2/Ptk2b/Dusp22/Tek/Enpp2/Limch1/Cdk6/Lims1/Ptpra/Ptk2/Utrn/Phldb2/Macf1/Arhgap6/Coro1c/Dmtn/Gfus/Rasa1/Smad3/Dmd/Rras/Iqgap1/Peak1/Vcl/Epb41l5/Nf1	54
GO:0035265	organ growth	0.0160341	0.355856	2.08733e-11	2.55531e-10	Pi16/Col14a1/Adrb1/Ddr2/Kdr/Ccnd2/Ptpn11/Tmem38b/Gja1/Dusp6/Ybx3/Rgs4/Nr3c1/Dipk2a/Cxadr/Map7/Col27a1/Bmpr1a/Ift80/Kcnk2/Gata6/Cited2/Ext1/Tbx5/Fgf2/Jarid2/Ehmt2/Fosl2/Tgfbr2/Hdac2/Thbs1/Smo/Camk2d/Akap6/Bcl2/Ankrd26/Heg1/Zmpste24/Dll1/Slc25a4/Akt1/Prlr/Yap1/Rarb/Fgf9/Mapk11/Mef2c/Trip10/Stk3/Tgfb2/Ctdp1/Hlx/Ptk2/Vgll4/Cav3/Myh10/Sirt1/Agt/Ly6e/Igf1/Carm1/Bcl2l11/Acacb/Mapk14/Pim1/Ccm2l/Sorbs2/Tb…	79
GO:0035967	cellular response to topologically incorrect protein	0.00953927	0.451923	2.15951e-11	2.63332e-10	Pik3r1/Ppp1r15a/Ccnd1/Herpud1/Tmtc4/Ddrgk1/Pmp22/Hspd1/Dnajb14/Os9/Ermp1/Cdk5rap3/Atf4/Bag3/Uggt2/Optn/Crebrf/Nck1/Abca7/Pdia6/Rnf126/Aup1/Tmem33/Bok/Creb3l1/Dnajb12/Daxx/Bak1/Rhbdd1/Abcb10/Nck2/Bag6/Pigbos1/Ero1a/Dnajc18/Creb3/Xbp1/Cops5/Erlec1/Uggt1/Selenos/Atf6b/Rnf185/Ngly1/Ddit3/Ufd1/Ube2w	47
GO:0060348	bone development	0.0170489	0.347107	2.18e-11	2.64791e-10	Col3a1/Lox/Ogn/Serpinh1/Col1a1/Sparc/Bgn/Ddr2/Alpl/Scx/Ninj1/Kdr/Sik3/Rflnb/Tmem38b/Gja1/Ptprc/Trpv4/Zbtb16/Fbn1/Dchs1/Pls3/Sbds/Bmp4/Cyp26b1/Bmp6/Col27a1/Spns2/Sulf1/Fgfr3/Ift80/Cited2/Timp3/Ext1/Plxnb1/Hspg2/Cfh/Trp53/Xylt1/Map2k6/Fosl2/Tgfbr2/Mmp14/Smad9/Thbs1/Adamts7/Fbxw7/Trip11/Fgf18/Nsd2/Zmpste24/Asxl1/Tyrobp/Rarb/Mapk11/Miga2/Mef2c/Inppl1/Dym/Large1/Igf1/Carm1/Chsy1/Pex7/Mapk14/Rab23/Lrrk…	84
GO:0006936	muscle contraction	0.0211082	0.320988	2.22052e-11	2.68663e-10	Myh7/Ccn2/Tpm4/Ptgs1/Lmod3/Adrb1/Trim63/Snta1/Acta2/Myh14/Ppp1r13l/Myom2/Mkks/Tmem38b/Sphk1/Tnni2/Zfas1/Trpv4/Scn4b/Flt1/Pde4b/Cacnb2/Synm/Bin1/Gja5/Dsc2/Clcn1/Sulf1/Calcrl/Prkca/Cacna1s/Actc1/Apbb2/Casq1/Cav1/Sod1/Lmod2/Map2k6/Smtn/Kcnh2/Sgcd/Ank2/Kcnd2/Tnnt2/Gpd1l/Camk2d/Chrnb1/Abcc9/Cd38/Pde5a/Hcn4/Csrp3/Akap6/Uty/Map2k3/Tmod3/Casq2/Nppa/Tpm2/Flna/Map2k1/Zdhhc21/Dbn1/Smad7/Atp8a2/Ednrb/Kbtbd13…	104
GO:1990138	neuron projection extension	0.0154252	0.36019	2.54525e-11	3.06759e-10	Postn/Sema3c/Tnfrsf12a/Nrp1/Jade2/Nrp2/Fn1/Twf2/Sema6b/Cxcl12/Wnt5a/Afdn/Ifrd1/Ngf/Bdnf/Raph1/Dclk1/Ndn/Ulk2/Ttl/Sema6d/Map1b/Mgll/Ptprs/Nrn1/Slit3/Rab21/Picalm/Apoe/Csf1r/Sema6a/Sema3g/Plxna1/Ntn1/Smo/Trpv2/Mecp2/Clasp2/Zfyve27/Sema3b/Slc9a6/Slit2/L1cam/C9orf72/Dbn1/Sema7a/Sema5a/Ulk1/Prkn/Ttc3/Plxna4/Usp9x/Limk1/Macf1/Olfm1/Impact/Stk11/Cyfip1/Auts2/Eif2b2/Unc13a/Llph/Itgb1/Arhgap32/Eif4g2/Shtn…	76
GO:0060828	regulation of canonical Wnt signaling pathway	0.0174548	0.342629	2.7581e-11	3.31018e-10	Col1a1/Wnk1/Limd1/Lmbr1l/Egr1/Dab2/Lrrk2/Wnt5a/Foxo3/Bmal1/Sox17/Csnk1e/Ppp2r3a/Fgfr3/Lzts2/Xiap/Ttc21b/Cav1/Tmem64/Fgf2/Apoe/Dact3/Wnt11/Wnk2/Tle2/Hdac2/Invs/Ift20/Sox7/Sfrp1/Usp34/G3bp1/Wls/Fam53b/Tgfb1/Apc2/Nppa/Yap1/Zeb2/Fgf9/Ptpru/Ruvbl2/Otulin/Stk3/Sema5a/Snai2/Bambi/Tnks2/Prkn/Rapgef1/Dact1/Mad2l2/Bicc1/Sdhaf2/Stk11/Rnf220/Rnf146/Mapk14/Ubac2/Tnks/Caprin2/Eda/Smad3/Lrp4/Cdh2/Lrrk1/Hhex/Rec…	86
GO:0003018	vascular process in circulatory system	0.0172519	0.34413	2.77202e-11	3.31018e-10	Ptgs1/Apln/Adrb1/Itga1/Kdr/Snta1/Acta2/Akap12/Mkks/Gja1/Trpv4/Nr3c1/Abcg2/Gja5/Add3/Amot/Adora2a/Bmp6/Ramp2/Alox5/Ext1/Cav1/Capn1/Mgll/Sod1/Nppb/Apoe/Ace/P2ry1/Ece1/Gclm/Mmp2/Adcy6/Ptp4a3/Abcb1a/Sod3/Cd38/Pde5a/Tgfb1/Scpep1/Nppa/Akt1/Map2k1/Slit2/Zeb2/Per2/Zdhhc21/Slc22a5/Ednrb/Angpt1/Slc16a2/Gpr4/Atg5/Vstm4/Ptk2/Sirt1/Irag1/Gclc/Agt/Cx3cl1/Dock4/Grip2/Kcnj8/Wdr35/Rap1gds1/Slc2a1/Slc8a1/Adm/Manf/…	85
GO:0007163	establishment or maintenance of cell polarity	0.016846	0.34728	2.77847e-11	3.31018e-10	Fscn1/Amotl2/Actb/Clasp1/Gja1/Parvg/Wnt5a/Jam3/Myh9/Cyp26b1/Amot/Rpgrip1l/Ephb1/Map1b/Sipa1/Sdccag8/Wnt11/Aqp1/Parva/Cfl1/Fat1/Llgl2/Ift20/Gpsm1/Exoc4/Lmna/Tcf15/Clasp2/Rhobtb1/Tcirg1/Dlg4/Ptk2b/Myo9a/Rhou/Igf1r/Ripor2/Nckap1/Dock8/Tek/Slc9a6/Cdc42/Dctn1/Gbf1/Lims1/Cyth1/Ctnna1/Alpk2/Fbf1/Crkl/Dock7/Arfgef1/Rhoq/Phldb2/Macf1/Snap91/Kcnj8/Igf1/Stk11/Mad2l1/Arf4/Wdr1/Myo9b/Wee1/Rhoj/Actr2/Pard6b/It…	83
GO:0032388	positive regulation of intracellular transport	0.0144104	0.369792	2.81727e-11	3.3436e-10	Pik3r1/Ehd2/Dab2/Vps11/Anxa2/Pgap1/Wipf1/Bag3/Kcnb1/Rab21/Zpr1/Tbc1d20/Crebrf/Pdcd5/Sar1a/Prkcd/Ehd1/Smo/Mecp2/Fbxw7/Pcnt/Tgfb1/Cep131/Oaz2/Sfn/Abca12/Tek/Tm9sf4/Cdc42/Flna/Ldlrap1/Hspa1l/Tcaf1/Stom/Tcaf2/Khdrbs1/Uaca/Rapgef3/C2cd5/Mdm2/Strit1/Ipo5/Fyn/Erbb2/Asph/Camk1/Myo1c/Mtmr2/Fis1/Stk11/Xbp1/Nrde2/Mapk14/Tmem30a/Actn2/Capn10/Prnp/Dmap1/Eif3e/Gas6/Prkaa1/Dhx9/Prkaca/Tardbp/Kif3a/Commd1/Ripor1…	71
GO:0048640	negative regulation of developmental growth	0.01096	0.418605	2.8434e-11	3.36178e-10	Cdkn1a/Pi16/Adrb1/Sema3c/Fstl4/Nrp1/Lgmn/Gja1/Sema6b/Rgs4/Wnt5a/Cxadr/Ifrd1/Fgfr3/Ulk2/Kcnk2/Sema6d/Cited2/Tbx5/Ptprs/Jarid2/Tgfbr2/Hdac2/Sema6a/Sema3g/Ntn1/Cfl1/Mecp2/Rgma/Ankrd26/Sema3b/Dusp10/Slit2/Mapk11/Epha7/Stk3/Sema7a/Sema5a/Socs2/Ctdp1/Ulk1/Ptk2/Vgll4/Cav3/Ttc3/H19/Ptch1/Gnas/Wwc2/Sema6c/Sema4a/Sema3a/Actr3/Tcf7l2	54
GO:0048511	rhythmic process	0.0207023	0.321767	2.94071e-11	3.46366e-10	Rorc/Dbp/Ahcy/Adrb1/Alb/Ptgds/Nos2/Egr1/Ces1d/Ptprn/Myh9/Nudt12/Klf9/Foxo3/Bmal1/Adcy1/Gfpt1/Csnk1e/Fas/Ngf/Adora2a/Per1/Crem/Ahcyl/Bdnf/Nampt/Cavin3/Nfil3/Cry2/Ass1/Nfya/Atf4/Adrm1/Trp53/Tef/Dpyd/Creb1/Nr1d1/Hdac2/Ogt/Fbxl3/Schip1/Cipc/Usp2/Kcnd2/Hlf/Parp1/Suv39h1/Enox2/Fbxw7/Bhlhe41/Ciart/Rora/Igf1r/Sgpl1/Arrb2/Enpp2/Per2/Timeless/Top1/Dyrk1a/Nr1d2/Klf10/Mettl3/Sirt1/Prkaa2/Usp9x/Csnk2a1/Pla2g4…	102
GO:0044270	cellular nitrogen compound catabolic process	0.0267912	0.295964	3.05976e-11	3.59027e-10	Tent5b/Cirbp/Xdh/Csdc2/Ahcy/Igfbp3/Tent5a/Vim/Pde4a/Ncbp2/Hmox1/Mettl16/Tnrc6a/Tet1/Caprin1/Nudt12/Dut/Nudt16/Nudt4/Nt5c1a/Ahcyl/Brf1/Dffa/Skic2/Nudt15/Supv3l1/Wdr82/Ago4/Nt5e/Tob1/Zpr1/Nudt5/Dpyd/Dcp2/Cidea/Cdadc1/Trir/Zfp36/Pan2/Skic3/Rida/Entpd5/Pnpt1/Entpd1/Gda/Lrpprc/Dhx36/Exosc5/Hnmt/Smg1/Pde5a/Adal/Nsun2/Atm/Pcbp4/Phax/Nt5c3/Ybx2/Lsm6/Entpd2/Hnrnpc/Galt/Dkc1/Sidt2/Nudt1/Mettl3/Zc3h4/Fxr2/F…	132
GO:0006469	negative regulation of protein kinase activity	0.0150193	0.362745	3.14424e-11	3.67553e-10	Cdkn1a/Actb/Chordc1/Dusp3/Errfi1/Ptprc/Inpp5k/Adarb1/Pkia/Ppm1f/Ggnbp2/Spry4/Adora2a/Socs5/Prkca/Irak3/Dusp1/Cdk5rap3/Cav1/Apoe/Thy1/Aida/Casp3/Tfap4/Dnaja1/Fbxo7/Prkcd/Cblb/Lyn/Fem1a/Dnaja3/Sfrp1/Camk2n1/Dtnbp1/Dusp10/Chmp6/Trib1/Fabp4/Heg1/Dusp22/Nppa/Akt1/Spred1/Uchl1/Daxx/Cdk5rap1/Inppl1/Adar/Gadd45b/Cav3/Sirt1/Agt/Ptpn6/Dusp16/Coro1c/Slc8a1/Tnfaip3/Inca1/Hmgcr/Hhex/Mapk8ip1/Smpd1/Gskip/Cdk5r…	74
GO:0006109	regulation of carbohydrate metabolic process	0.0152222	0.360577	3.23251e-11	3.76457e-10	Rorc/Gnmt/Pth1r/Igfbp3/Aldob/Hsd11b1/Gpd1/Inpp5k/Nr3c1/Myh9/Midn/Gfpt1/Ddit4/Grb10/Flcn/C1qtnf2/Tigar/Khk/Trp53/Plcd1/P2ry1/Gpt2/Sorbs1/Myc/Ogt/Irs2/Slc35b4/Insr/Slc45a3/Jmjd8/Tgfb1/Ptk2b/Gnb3/Esrrb/Rora/Zmpste24/Akt1/Zbtb20/Ppp1r3d/Ppp1r3b/Pdk2/Eif6/Adcyap1r1/Mlst8/Slc25a12/Dgat2/Soga1/Cox11/Prkn/Sirt1/Prkaa2/Git1/Sirt7/Cltc/Zfp692/Igf1/Stk11/C1qtnf1/Ppargc1a/Acacb/Prxl2c/Ppp1ca/P2ry6/Prkaa1/Cry…	75
GO:1905475	regulation of protein localization to membrane	0.0154252	0.358491	3.3098e-11	3.8402e-10	Bcl2l1/Pik3r1/Actb/Wnk1/Sqstm1/Ppfia1/Dab2/Kalrn/Inpp5k/Tmbim1/Vamp8/Adam10/Gpc6/Kcnj11/Appl1/Kcnb1/Cnpy4/Picalm/Lrrc15/Csk/Tamalin/Pdcd5/Mmp14/Sorbs1/Snx27/Ogt/Rapgef4/Camk2d/Clasp2/Tnik/Numb/Csrp3/Dlg4/Tgfb1/Epm2a/Akt1/Lgals3/Map2k1/Ldlrap1/Tcaf1/Stom/Tcaf2/Dbn1/C2cd5/Crkl/Prkn/Rhoq/Csnk2a1/Grip2/Cltc/Fyn/Mesd/Erbb2/Myo1c/Gpc4/Fis1/Dmtn/Camk2a/Lrp4/Cdh2/Sorbs2/Prnp/Itgb1/Stx8/Lztfl1/Pid1/Arhgap…	76
GO:0043393	regulation of protein binding	0.0162371	0.350877	3.50744e-11	4.05438e-10	Cdkn1a/Nes/Ptprf/Lox/Actb/Spta1/Plxnd1/Xirp1/Dab2/Lrrk2/Wnt5a/Anxa2/Dysf/Map1lc3b/Bmp4/Ngf/Ramp2/Bdnf/Fktn/Tmem132a/Cav1/Sympk/Cdon/Tmc8/Apoe/Ace/Myc/Mfng/Cblb/Mecp2/Dtnbp1/Plscr1/Rgma/Plk2/Lfng/Akt1/Golga2/Arrb2/Cycs/Ppp1r2/Cdc42/Ldlrap1/Wfikkn2/Ttbk2/Epb41/Stk3/Ifit2/Angpt1/Large1/Bambi/Blk/Prkn/Vtn/Cald1/Sting1/Hip1r/Nvl/Dact1/Usp9x/Hspa4/Ip6k2/Carm1/Camk1/Mark3/Nfatc4/Caprin2/Gnl3l/Ccm2l/Mapk…	80
GO:0045860	positive regulation of protein kinase activity	0.0231378	0.308943	3.72274e-11	4.28732e-10	Cdkn1a/Ccnd1/Fgd4/Ddr2/Clu/Ccnd2/Adam17/Mmd/Tcim/Egr1/Ptprc/Lrrk2/Marcks/Fbn1/Wnt5a/Flt1/Dipk2a/Epha4/Irgm1/Il6ra/Rgcc/Fgf2/Osbpl8/Vegfc/Magi3/Dok7/Ace/Map2k6/Csf1r/Csk/Ghr/Taok3/Thbs1/Prkcd/Agap2/Csf1/Reln/Insr/Abi2/Pde5a/Fbxw7/Ppp1r9a/Akap6/Fgf18/Dlg4/Wdr59/Tgfb1/Ptk2b/Fgd2/Map2k3/Etaa1/Map4k2/Akt1/Prlr/Arrb2/Traf6/Map2k1/Daxx/Zeb2/Cdk5rap1/Mef2c/Tgfb2/Angpt1/Snx9/Ptk2/Dazap2/Sirt1/Ajuba/Ripk3/…	114
GO:0071496	cellular response to external stimulus	0.0215141	0.316418	3.74104e-11	4.2925e-10	Cdkn1a/Fam107a/Itga6/Col1a1/Tfrc/Sesn1/Postn/Glul/Chka/Scx/Alb/Ankrd1/Vcam1/Sesn3/Ptpn11/Plin3/Ptprc/Lrrk2/Gabarapl1/Tnrc6a/Map1lc3b/Dsc2/Rnf152/Fas/Bmp6/Comt/Tmem150c/Dap/Flcn/Gpr155/Atf4/Bag3/Cav1/Kcnb1/Sipa1/Trp53/Castor1/Wdr45/Ehmt2/Gsdmd/Wnt11/Bmf/Ogt/Aqp1/Pik3c2b/Got1/Rragc/Lpl/Suv39h1/Tsc1/Scd4/Bcl2/Wdr59/Map1lc3a/Gabarapl2/Ripor2/Mios/Akt1/Prkab2/Pdk2/Mlst8/Ywhaz/Klf10/Nudt1/Ulk1/Snai2/At…	106
GO:1903008	organelle disassembly	0.0113659	0.408759	3.813e-11	4.35898e-10	Retreg1/Chka/Bnip3/Sqstm1/Pnpla2/Atg13/Ddrgk1/Plin3/Gabarapl1/Map1lc3b/Irgm1/Ulk2/Mrrf/Fundc1/Tigar/Trp53/Optn/Vrk1/Wdr45/Usp30/Ogt/Fbxo7/Fbxw7/Map1lc3a/Gabarapl2/Lrba/Slc25a4/Golga2/Denr/Gbf1/Ulk1/Atg5/Prkn/Prkaa2/Sting1/Ascc3/Spata33/Clec16a/Fbxl4/Fis1/Nedd9/Gabarap/Pink1/Parl/Atg14/Gfm2/Dnm1l/Srebf1/Ufc1/Capn10/Wdr45b/Mul1/Prkaa1/Tex264/Mtif3/Fkbp8	56
GO:0016525	negative regulation of angiogenesis	0.00974224	0.440367	4.1237e-11	4.6969e-10	Thbs2/Sparc/Emilin1/Adamts9/Serpinf1/Flt1/Vash1/Amot/Stab1/Sulf1/Alox5/Ccr2/Flcn/Rgcc/Synj2bp/Foxj2/Sema6a/Thbs1/Mecp2/Pde3b/Tcf4/Creb3l1/Plk2/Tek/Spred1/Stard13/Angpt2/Tgfb2/Epn1/Gpr4/Stat1/Ecscr/Col4a2/Col4a3/Agt/Slc12a2/Pgk1/Sars1/Rock2/Hhex/Tie1/Sema4a/Dcn/Cldn5/Nf1/Krit1/Gadd45a/Dab2ip	48
GO:0042594	response to starvation	0.0152222	0.358852	4.20598e-11	4.77313e-10	Cdkn1a/Sesn1/Eif4ebp1/Glul/Chka/Alb/Sesn3/Plin3/Lrrk2/Gabarapl1/Tnrc6a/Foxo3/Map1lc3b/Dsc2/Rnf152/Fas/Tbc1d5/Comt/Ulk2/Dap/Flcn/Gpr155/Atf4/Trp53/Castor1/Wdr45/Ehmt2/Zfp36/Bmf/Pik3c2b/Rragc/Suv39h1/Cad/Tsc1/Bcl2/Wdr59/Map1lc3a/Gabarapl2/Bcas3/Mios/Ywhaz/Klf10/Ulk1/Atg5/Rnf167/Kptn/Sirt1/Prkaa2/Clec16a/Mtmr3/Impact/Gcn1/Slc2a1/Gabarap/Eif2b1/Xbp1/Atg14/Srebf1/Lrp11/Wrn/Mapk8/Gas2l1/Gas6/Jun/Wdr45b…	75
GO:1903844	regulation of cellular response to transforming growth factor beta stimulus	0.0115689	0.404255	4.33436e-11	4.90094e-10	Nrep/Lox/Emilin1/Adam17/Pbld1/Ltbp1/Peg10/Lrg1/Fbn1/Adamtsl2/Tet1/Htra1/Brms1l/Spred2/Tgfb1i1/Flcn/Smurf2/Cited2/Furin/Cflar/Aspn/Trp53/Nrros/Cidea/Hdac2/Ogt/Thbs1/Bcl9l/Got1/Cav2/Tgfb1/Zeb1/Ing1/Rasl11b/Skil/Spred1/Prdm16/Wfikkn2/Zeb2/Smad7/Tgfb3/Pmepa1/Ldlrad4/Bambi/Cav3/Sirt1/Crebbp/Stk11/Sap30/Xbp1/Smad3/Snw1/Brms1/Htra3/Tgfbr3l/Tgfbr3/Hdac1	57
GO:0048545	response to steroid hormone	0.0174548	0.339921	4.41283e-11	4.9651e-10	Fam107a/Sult1a1/Lox/Cdo1/Pik3r1/Eif4ebp1/Adh1/Heyl/Alpl/Akr1c14/Bche/Trim63/Errfi1/Ddrgk1/Fkbp4/Dab2/Prmt2/Nr3c1/Vps11/Klf9/Bmal1/Bmp4/Fas/Ddit4/Per1/Uri1/Bdnf/Kdm3a/Paqr7/Cry2/Ass1/Cav1/Calr/Fosl2/Tcf21/Calcoco1/Eif4e/Crebrf/Zfp36/Acr/Tfap4/Dnaja1/Aqp1/Fbxo32/Wbp2/Nr3c2/Parp1/Rest/Sfrp1/Trerf1/Bcl2/Tgfb1/Esrrb/Map2k1/Yap1/Daxx/Safb/Tgfb2/Tgfb3/Ddx17/Atp1a1/Ywhah/Sirt1/Fkrp/Safb2/Igf1/Carm1/Zfp36…	86
GO:0007033	vacuole organization	0.0158311	0.352941	4.42304e-11	4.9651e-10	Trp53inp1/Atg101/Tom1/Atg13/Lrrk2/Gabarapl1/Vps11/Coro1a/Map1lc3b/Vps16/Irgm1/Ulk2/Rab7/Pacs2/Flcn/Bag3/Ext1/Pla2g5/Trp53inp2/Fig4/Tmem41b/Wdr45/Ehmt2/Synpo2/Mfsd8/Atg4c/Rab20/Pik3c2b/Ift20/Abca1/Laptm4b/Hook2/Tcirg1/Chmp6/Ap3b1/Map1lc3a/Gabarapl2/Epm2a/Lrba/Traf6/C9orf72/Fez2/Ulk1/Hexb/Atg5/Chmp4b/Sting1/Cln6/Chmp2a/Mtmr3/Hook3/Naglu/Gnptab/Tfe3/Gabarap/Pink1/Snx18/Cln8/Lrsam1/Atg14/Rab23/Rab33b…	78
GO:0051492	regulation of stress fiber assembly	0.00913335	0.454545	4.49458e-11	5.02726e-10	Ccn2/Pik3r1/Actg1/Arap1/Nrp1/Mkks/Clasp1/Ppfia1/Inpp5k/Ppm1f/Asap3/Synpo2l/Arhgef15/S100a10/Pfn2/Arhgap28/Carmil1/Rgcc/Sorbs3/Rhoc/Wnt11/Coro2b/Kank3/Lpar1/Clasp2/Tsc1/Ppp1r9a/Wasf2/Cdc42/Limch1/Evl/Tgfb3/Rapgef3/Limk1/Phldb2/Arhgap6/Stmn1/Pxn/Smad3/Cd47/Rock2/Tjp1/Rhoa/Ccdc88a/Ttc8	45
GO:0035051	cardiocyte differentiation	0.0146134	0.363636	5.06118e-11	5.64072e-10	Pi16/Col14a1/Adrb1/Sema3c/Ccnd2/Vcam1/Xirp1/Rgs4/Nr3c1/Sox17/Cxadr/Bmp4/Bmpr1a/Actc1/Gata6/Cited2/Tbx5/Cacybp/Efnb2/Sox6/Hdac2/Sgcd/Nrap/Dhx36/Ift20/Camk2d/Lmna/Rest/Tsc1/Csrp3/Akap6/Tgfb1/Lrrc10/Lrrc27/Sox18/Zmpste24/Dll1/Slc25a4/Irx3/Arrb2/Cdc42/Rarb/Bves/Mef2c/Trip10/Tgfb2/Ctdp1/Atg5/Large1/Alpk2/Abi3bp/Cav3/Myh10/Sirt1/Nebl/Fhl2/Agt/Kcnj8/Igf1/Sgcb/Naglu/Pbrm1/Slc8a1/Sorbs2/Acvr1/Actn2/Tbx2/I…	72
GO:0110020	regulation of actomyosin structure organization	0.0099452	0.433628	5.0996e-11	5.66324e-10	Ccn2/Pik3r1/Actg1/Arap1/Nrp1/Mkks/Clasp1/Ppfia1/Inpp5k/Ankrd23/Ppm1f/Asap3/Synpo2l/Arhgef15/S100a10/Pfn2/Arhgap28/Carmil1/Rgcc/Sorbs3/Rhoc/Wnt11/Coro2b/Hdac2/Kank3/Lpar1/Clasp2/Tsc1/Ppp1r9a/Wasf2/Cdc42/Limch1/Mef2c/Evl/Tgfb3/Rapgef3/Cav3/Limk1/Phldb2/Arhgap6/Stmn1/Pxn/Smad3/Cd47/Rock2/Tjp1/Rhoa/Ccdc88a/Ttc8	49
GO:0018212	peptidyl-tyrosine modification	0.0209052	0.317901	5.19689e-11	5.75075e-10	Cd74/Ddr2/Kdr/Nrp1/Adam17/Errfi1/Ptpn11/Tpst1/Prmt2/Ptprc/Flt1/Ighm/Ehd4/Ggnbp2/Epha4/Bmp6/Socs3/Fgfr3/Socs5/Il6ra/Prkca/Cav1/Cspg4/Plcg2/Trp53/Tspan9/Dok7/Ace/Csf1r/Thy1/Ghr/Hdac2/Plpp3/Efemp1/Prkcd/Cblb/Lyn/Reln/Insr/Abi2/Cav2/Sfrp1/Clcf1/Fbxw7/Dlg4/Tgfb1/Chmp6/Il15/Ptk2b/Tnk2/Igf1r/Dusp22/Itga5/Tek/Prlr/Arrb2/Enpp2/Jak1/Snhg20/Epha7/Mlst8/Dyrk1a/Angpt1/Rap2b/Ptpn4/Ptk2/Rap2c/Blk/Vtn/Agt/Ptpn6/…	103
GO:0017015	regulation of transforming growth factor beta receptor signaling pathway	0.0113659	0.405797	5.35629e-11	5.90611e-10	Nrep/Lox/Emilin1/Adam17/Pbld1/Ltbp1/Peg10/Lrg1/Fbn1/Adamtsl2/Tet1/Htra1/Brms1l/Spred2/Tgfb1i1/Flcn/Smurf2/Cited2/Furin/Aspn/Trp53/Nrros/Cidea/Hdac2/Ogt/Thbs1/Bcl9l/Got1/Cav2/Tgfb1/Zeb1/Ing1/Rasl11b/Skil/Spred1/Prdm16/Wfikkn2/Zeb2/Smad7/Tgfb3/Pmepa1/Ldlrad4/Bambi/Cav3/Sirt1/Crebbp/Stk11/Sap30/Xbp1/Smad3/Snw1/Brms1/Htra3/Tgfbr3l/Tgfbr3/Hdac1	56
GO:0044772	mitotic cell cycle phase transition	0.0269941	0.292952	5.56896e-11	6.11891e-10	Cdkn1a/Nes/Fam107a/Eif4ebp1/Cenpf/Ccnd1/Fbxo31/Actb/Ddr2/Ccnd2/Adam17/Nacc2/Hacd1/Clasp1/Miip/Prmt2/Ctdsp2/Pkia/Dync1li1/Hecw2/Syf2/Cdk5rap3/Rgcc/Appl1/Ccng1/Hus1/Fhl1/Trp53/Nop53/Zpr1/Eif4e/Gpnmb/Cenpj/Larp7/Myc/Xpc/Tfap4/Cul4b/Taok3/Fbxo7/Eps8/Abcb1a/Smarcb1/E2f6/Bcl7c/Mecp2/Camk2d/Clasp2/Cdk17/Bcl2/Atm/Xrcc3/Tgfb1/Creb3l1/Plk2/Cdc23/Bcl7b/Esrrb/Rpa2/Cdk4/Rhou/Tmod3/Ccnh/Akt1/Rbbp8/Crlf3/Fbxl7/…	133
GO:0030323	respiratory tube development	0.0170489	0.341463	5.68285e-11	6.22207e-10	Col3a1/Lox/Ccn2/Sparc/Rcn3/Kdr/Hsd11b1/Selenon/Errfi1/Tmem38b/Wnt5a/Adamtsl2/Aldh1a2/Bmp4/Igfbp5/Fgfr3/Bmpr1a/Gata6/Ext1/Tbx5/Rbbp9/Fgf2/Hikeshi/Creb1/Ace/Fosl2/Tcf21/Tgfbr2/Mmp14/Atxn1/Tmtc3/Numb/Fbxw7/Thrb/Fgf18/Tgfb1/Ap3b1/Heg1/Asxl1/Abca12/Dhcr7/Cdc42/Map2k1/Yap1/Stk40/Fgf9/Timeless/Cic/Foxp2/Adamts2/Tgfb3/Ywhaz/Tshz3/Rab3a/Srsf6/Ccbe1/Mgp/Lama5/Tns3/Bag6/Tnrc6c/Tab1/Igf1/Pdpn/Asah1/Epas1/Hs6…	84
GO:0097191	extrinsic apoptotic signaling pathway	0.016846	0.342975	5.72232e-11	6.2433e-10	Bcl2l1/Itga6/Lcn2/Pik3r1/Mknk2/Unc5b/Pea15a/Tnfrsf12a/Ret/Nrp1/Gas1/Hmox1/Dab2/Ptprc/Tmbim1/Zfp110/Foxo3/Bmp4/Fas/Ngf/Acsl5/Hipk1/Fgfr3/Casp8/Timp3/Bag3/Cav1/Cflar/Mllt11/Tmc8/Sgk3/Gclm/Mcl1/Thbs1/Agap2/Lmna/Sfrp1/Trps1/Bok/Bcl2/Tgfb1/Itgav/Tlr3/Lgals3/Skil/Yap1/Daxx/Bak1/Stk3/Tgfb2/Snai2/Ctnna1/Ltbr/Dedd2/Gclc/Agt/Cx3cl1/Fyn/Igf1/Sh3rf1/Il33/Bcl2l11/Gabarap/Tnfsf10/Tnfaip3/Eya2/Smad3/Tnfsf12/Acv…	83
GO:0016032	viral process	0.0211082	0.316109	6.07183e-11	6.60146e-10	Bcl2l1/Cd74/Plscr2/Slc3a2/Apobec3/Nrp1/Fbln1/Fam111a/Inpp5k/Adarb1/Mx2/Kpna2/Vps16/Vamp8/Vps37b/Rab7/Eif3g/Furin/Cav1/Ifitm1/Trp53/Tmem41b/Apoe/Csf1r/Lrrc15/Tbc1d20/Uvrag/Zfp36/Larp7/Eif3b/Tfap4/Lgals1/Jpt2/Cfl1/Smarcb1/Zdhhc9/Insr/Cav2/Hs3st5/Ddx56/Rest/Spcs3/Plscr1/Bcl2/Chmp6/Itgav/Resf1/Denr/Trim13/Psmc3/Stom/Oas1b/Adar/Cdk9/Ctdp1/Atg5/Stat1/Ppid/Chmp4b/Morc2a/Srpk1/Prkn/P4hb/Usp6nl/Tpcn1/Ctsb…	104
GO:0042177	negative regulation of protein catabolic process	0.0101482	0.42735	6.18713e-11	6.70338e-10	Timp4/Nos2/Ddrgk1/Sco1/Anxa2/Nqo1/Dysf/Tmem132a/Irak3/Mgat3/Cdk5rap3/Timp3/Furin/Nop53/Cyp51/Ogt/Agap2/Uchl5/Ptpn3/Laptm4b/Svip/Gabarapl2/Sgta/Flna/Azin1/Ubxn1/Atraid/Sf3b3/Psmf1/Sirt2/Bag6/Eif3h/Clec16a/Usp9x/Mad2l2/Timp2/Fyn/Rilp/Mad2l1/Bag5/Klhl40/Smad3/Hmgcr/Usp14/Tlk2/Egfr/Ric1/Alad/Prkcg/Dab2ip	50
GO:0030324	lung development	0.016846	0.341564	7.2492e-11	7.8268e-10	Col3a1/Lox/Ccn2/Sparc/Rcn3/Kdr/Hsd11b1/Selenon/Errfi1/Tmem38b/Wnt5a/Adamtsl2/Aldh1a2/Bmp4/Igfbp5/Fgfr3/Bmpr1a/Gata6/Ext1/Tbx5/Rbbp9/Fgf2/Hikeshi/Creb1/Ace/Fosl2/Tcf21/Tgfbr2/Mmp14/Atxn1/Tmtc3/Numb/Fbxw7/Thrb/Fgf18/Tgfb1/Ap3b1/Heg1/Asxl1/Abca12/Dhcr7/Cdc42/Map2k1/Yap1/Stk40/Fgf9/Timeless/Cic/Foxp2/Adamts2/Tgfb3/Ywhaz/Tshz3/Rab3a/Srsf6/Ccbe1/Mgp/Lama5/Tns3/Bag6/Tnrc6c/Tab1/Igf1/Pdpn/Asah1/Epas1/Hs6…	83
GO:0099175	regulation of postsynapse organization	0.0113659	0.402878	7.48754e-11	8.05616e-10	Ptprf/Baiap2/Eef2k/Cux2/Nrp2/Kalrn/Lrrk2/Marcks/Wnt5a/Afdn/Caprin1/Arhgef15/Epha4/Adam10/Lrrc4b/Rps6ka5/Ptprs/Apoe/Rapgef4/Dhx36/Cfl1/Reln/Dnm3/Abi2/Dtnbp1/Numb/Ppp1r9a/Ptk2b/Akt1/Cdc42/Epha7/Srgn/Dbn1/Opa1/Abi3bp/Tanc1/Itsn1/Lrfn4/Dact1/Ptprd/Efna1/Fyn/Nedd9/Arf4/Dnm1l/Caprin2/Cdh2/Actr2/Prnp/Arhgap44/Bhlhb9/Actr3/Psd/Nf1/Tanc2/Camk2b	56
GO:0060541	respiratory system development	0.0184697	0.32971	7.892e-11	8.46205e-10	Col3a1/Lox/Ccn2/Sparc/Rcn3/Kdr/Hsd11b1/Selenon/Errfi1/Tmem38b/Wnt5a/Adamtsl2/Aldh1a2/Bmp4/Igfbp5/Rpgrip1l/Fgfr3/Bmpr1a/Gata6/Ext1/Tbx5/Rbbp9/Fgf2/Hikeshi/Creb1/Ace/Fosl2/Tcf21/Tgfbr2/Mmp14/Chd7/Disp1/Atxn1/Tmtc3/Numb/Fbxw7/Thrb/Fgf18/Tgfb1/Ap3b1/Heg1/Asxl1/Abca12/Dhcr7/Cdc42/Map2k1/Yap1/Stk40/Fgf9/Timeless/Cic/Foxp2/Adamts2/Tgfb3/Ywhaz/Tshz3/Rab3a/Smchd1/Srsf6/Ccbe1/Mgp/Lama5/Tns3/Bag6/Tnrc6c/Fkr…	91
GO:0018108	peptidyl-tyrosine phosphorylation	0.0207023	0.31677	8.08381e-11	8.63794e-10	Cd74/Ddr2/Kdr/Nrp1/Adam17/Errfi1/Ptpn11/Prmt2/Ptprc/Flt1/Ighm/Ehd4/Ggnbp2/Epha4/Bmp6/Socs3/Fgfr3/Socs5/Il6ra/Prkca/Cav1/Cspg4/Plcg2/Trp53/Tspan9/Dok7/Ace/Csf1r/Thy1/Ghr/Hdac2/Plpp3/Efemp1/Prkcd/Cblb/Lyn/Reln/Insr/Abi2/Cav2/Sfrp1/Clcf1/Fbxw7/Dlg4/Tgfb1/Chmp6/Il15/Ptk2b/Tnk2/Igf1r/Dusp22/Itga5/Tek/Prlr/Arrb2/Enpp2/Jak1/Snhg20/Epha7/Mlst8/Dyrk1a/Angpt1/Rap2b/Ptpn4/Ptk2/Rap2c/Blk/Vtn/Agt/Ptpn6/Irf1/E…	102
GO:0006457	protein folding	0.0131926	0.375723	8.63033e-11	9.19034e-10	Fkbp5/Cd74/Hsph1/Clu/Chordc1/Pdia4/Mkks/Fkbp4/Dnajc7/Hspa13/Hspd1/Qsox1/Dnajb14/Ppic/Ppif/Dffa/Nppb/Hspa4l/Calr/Erp44/Pdcd5/Nudc/Entpd5/Txndc5/Dnaja1/Dnaja3/Ptges3l/Dnajb12/Pdia5/Nppa/Qsox2/Sgta/Ahsa2/Ppil1/Hspa1l/Ppil6/Ppid/P4hb/Fkbp9/Tbcb/Hspa4/Mesd/Pfdn4/Dnajb6/Pdcl/Ero1a/Dnajc18/Bag5/Clpx/Nudcd3/Dnajc25/Pdcl3/Fkbp11/Cdc37l1/Pdia3/Hsp90b1/Ppig/Grpel2/Cct6a/Arl2/Hspb2/St13/Fkbp2/Hspe1/Fkbp8	65
GO:2000181	negative regulation of blood vessel morphogenesis	0.00974224	0.432432	8.98861e-11	9.5392e-10	Thbs2/Sparc/Emilin1/Adamts9/Serpinf1/Flt1/Vash1/Amot/Stab1/Sulf1/Alox5/Ccr2/Flcn/Rgcc/Synj2bp/Foxj2/Sema6a/Thbs1/Mecp2/Pde3b/Tcf4/Creb3l1/Plk2/Tek/Spred1/Stard13/Angpt2/Tgfb2/Epn1/Gpr4/Stat1/Ecscr/Col4a2/Col4a3/Agt/Slc12a2/Pgk1/Sars1/Rock2/Hhex/Tie1/Sema4a/Dcn/Cldn5/Nf1/Krit1/Gadd45a/Dab2ip	48
GO:0030099	myeloid cell differentiation	0.0280089	0.2875	1.02352e-10	1.08006e-09	Lox/Tfrc/Cd74/Pik3r1/Tspan2/Gata2/Ets1/Ninj1/Bcl6/Adgrf5/Ptpn11/Itpkb/Ldb1/Dab2/Zbtb16/Fbn1/Nr3c1/Myh9/Foxo3/Gp1ba/Bmp4/Fas/Fgfr3/Zbtb46/Nfkbia/Casp8/Prkca/Alas1/Cdk5rap3/Cited2/Cflar/Tmem64/Nrros/Creb1/Csf1r/Fosl2/Tgfbr2/Zfp36/Sox6/Myc/Casp3/Sh3pxd2a/Csf1/Lyn/Sbno2/Tmem14c/Rabgap1l/Sfrp1/Leo1/Chuk/Plscr1/Fbxw7/Srp54c/Tcirg1/Tgfb1/Trib1/Il15/Ptk2b/Ap3b1/Wasf2/Dll1/Tmod3/Traf6/Cbfb/Flna/Tyrobp/Prd…	138
GO:0050772	positive regulation of axonogenesis	0.00913335	0.445545	1.02814e-10	1.08006e-09	Tnfrsf12a/Nrp1/Plxnd1/Fn1/Twf2/Cxcl12/Ngf/Plxnb3/Bdnf/Map1b/Plxnb1/Dixdc1/Picalm/Apoe/Plxna1/Ntn1/Trpv2/Plxnc1/Zfyve27/Golga2/Skil/Map2k1/Tiam2/Zeb2/L1cam/Dbn1/Sema7a/Sema5a/Plxna4/Limk1/Macf1/Snap91/Map6/Stk11/Cyfip1/Eif2b2/Amigo1/Trak1/Nin/Ache/Arhgap32/Eif4g2/Shtn1/Mapt/Myo5b	45
GO:0070252	actin-mediated cell contraction	0.00913335	0.445545	1.02814e-10	1.08006e-09	Myh7/Adrb1/Snta1/Acta2/Scn4b/Pde4b/Cacnb2/Bin1/Epdr1/Gja5/Dsc2/Actc1/Cav1/Kcnh2/Parva/Sgcd/Ank2/Tnnt2/Gpd1l/Camk2d/Abcc9/Hcn4/Akap6/Uty/Casq2/Flna/Zeb2/Limch1/Dbn1/Frmd6/Kcnj2/Strit1/Atp1a1/Cav3/Rnf207/Ctnna3/Kcnj8/Pdpn/Myo9b/Shtn1/Ccdc88c/Stc1/Epb41l5/Pkp2/Myl6	45
GO:0051090	regulation of DNA-binding transcription factor activity	0.0259793	0.293578	1.09025e-10	1.14144e-09	Tfrc/Cyp1b1/Ddr2/Heyl/Clu/Hr/Sphk1/Hmox1/Ddrgk1/Prmt2/Lrrk2/Crtc2/Wnt5a/Adcy1/Abra/Ifrd1/Ralgapa1/Zfp932/Ngf/Eda2r/Slco3a1/Erc1/Bdnf/Nfkbia/Ndn/Dap/Irak3/Cd200/Cdk5rap3/Ube2n/Rps6ka5/Cav1/Rgcc/Cflar/Cth/Plcg2/Nfkbib/Sox6/Hdac2/Plpp3/Reln/Smarcb1/Smo/Dnaja3/Mtpn/Anxa4/Rnf31/Chuk/Csrp3/Fzd2/Rnf25/Tgfb1/Trib1/Tlr3/Igf1r/Trib2/Akt1/Arrb2/Traf6/Traf3/Flna/E130311K13Rik/Trim13/Otulin/Ptgis/Stk3/Smad7/C…	128
GO:0006006	glucose metabolic process	0.0158311	0.346667	1.19259e-10	1.2444e-09	Apod/Rorc/Gnmt/Pik3r1/Igfbp3/Galm/Fabp5/Gpd1/Fbn1/Crtc2/Nr3c1/Midn/Pfkl/Slc25a13/Dcxr/Oma1/Kcnj11/Atf4/C1qtnf2/Tigar/Trp53/Slc2a8/Gpt2/Sorbs1/Myc/Ogt/Irs2/Slc35b4/Got1/Pgm2l1/Insr/Slc45a3/Gnb3/Esrrb/Rora/Zmpste24/Pgam1/Akt1/Pdk2/Per2/Kbtbd2/Oas1b/Inppl1/Slc25a12/Dgat2/Soga1/Cox11/Eno3/Prkn/Sirt1/Gpd2/Sirt7/Zfp692/Igf1/Pgk1/Stk11/C1qtnf1/Dlat/Ppargc1a/Acacb/Mapk14/Gpi1/Pgm2/Ganc/Prkaa1/Cry1/Pkm/Pr…	78
GO:0034765	regulation of monoatomic ion transmembrane transport	0.0284149	0.285714	1.2056e-10	1.25377e-09	Lcn2/Kcnv2/Adrb1/Ifngr2/Wnk1/Snta1/Selenon/Tmem38b/Zfas1/Taco1/Rgs4/Scn4b/Sco1/Kcnc1/Slc36a2/Pde4b/Cacnb2/Trpc3/Coro1a/Hecw2/Dysf/Bin1/Bmp4/Tspan13/Ywhaq/Ngf/Kcnj3/Clcn1/Alox5/Prkca/Cacna1s/Ppif/Ccr2/Cnksr3/Atp1b2/Kcnj11/Casq1/Cav1/Gopc/Kcnb1/Plcg2/Fhl1/Iscu/Cabp1/Thy1/Kcnip3/Kcnh2/Wnk2/Cd63/Snx27/Clic1/Tmem168/Fxyd6/Ank2/Chd7/Abcb1a/Lyn/Cfl1/Reln/Kcnd2/Ptpn3/Kcnk3/Gpd1l/Crbn/Atpsckmt/Camk2d/Ahna…	140
GO:0003158	endothelium development	0.011163	0.40146	1.29213e-10	1.33928e-09	Lcn2/Xdh/Fstl1/Myadm/S1pr3/Kdr/Atoh8/Afdn/Sox17/Bmp4/Bmp6/Col27a1/Slc40a1/Ptprs/Dll4/Col18a1/Apold1/Akap11/Foxj2/Fzd2/Zeb1/Ppp1r16b/S1pr2/Heg1/Sox18/Dll1/Stard13/Vezf1/Zdhhc21/Ednrb/Rapgef3/Rap2c/Rapgef1/Agt/Csnk2b/Naglu/Pbrm1/Pdpn/Clic4/Pecam1/Acvr1/Dmd/Fzd4/Rock2/Tjp1/Rhob/Stc1/Tie1/Vcl/Rhoa/Cldn5/Abcb1b/Gpx1/Krit1/Tmem100	55
GO:1901343	negative regulation of vasculature development	0.00974224	0.428571	1.31358e-10	1.35699e-09	Thbs2/Sparc/Emilin1/Adamts9/Serpinf1/Flt1/Vash1/Amot/Stab1/Sulf1/Alox5/Ccr2/Flcn/Rgcc/Synj2bp/Foxj2/Sema6a/Thbs1/Mecp2/Pde3b/Tcf4/Creb3l1/Plk2/Tek/Spred1/Stard13/Angpt2/Tgfb2/Epn1/Gpr4/Stat1/Ecscr/Col4a2/Col4a3/Agt/Slc12a2/Pgk1/Sars1/Rock2/Hhex/Tie1/Sema4a/Dcn/Cldn5/Nf1/Krit1/Gadd45a/Dab2ip	48
GO:0032543	mitochondrial translation	0.0107571	0.407692	1.41273e-10	1.45459e-09	Mrpl3/Taco1/Rmnd1/Mrpl34/Tufm/Mtif2/Mrpl36/Mrpl19/Ptcd3/Tsfm/Mrps22/Mpv17l2/Dars2/Mrpl49/Yars2/Mtrf1l/Lrpprc/Mrpl45/Nsun4/Mrpl35/Gfm1/Malsu1/Cdk5rap1/Coa3/Mrps6/Mrps14/Mrps2/Wars2/Mrpl13/Ndufa7/Mrpl18/Ptcd1/Mtg1/Mrpl42/Fastkd2/Mrpl37/Mrps26/Mrps27/Gfm2/Mrpl21/Mrpl47/C1qbp/Mrpl10/Mrps25/Mrps9/Mrpl48/Mrpl1/Mtif3/Mtg2/Ears2/Qrsl1/Mrpl43/Mrpl46	53
GO:0045727	positive regulation of translation	0.0113659	0.397163	1.4424e-10	1.48023e-09	Tent5b/Cirbp/Cyp1b1/Rbm3/Vim/Rmnd1/Mpv17l2/Tob1/Niban1/Pcif1/Ogt/Nck1/Thbs1/Dhx36/Nsun4/Akap6/Ptk2b/Cdk4/Eif2b5/Uhmk1/Cdk5rap1/Coa3/Eif6/Sh3bgrl/Nck2/Khdrbs1/Cpeb1/Mettl3/Nat10/Fxr2/Cnbp/Prmt1/Pym1/Larp4b/Fastkd2/Erbb2/Impact/Mrps27/Abcf1/Pink1/Otud6b/Mettl14/Samd4/Eif3e/Eif4g2/C1qbp/Upf3b/Fxr1/Bcl3/Rps6kb2/Pkm/Dhx9/Zcchc4/Rps27l/Ythdf3/Rbms3	56
GO:0008361	regulation of cell size	0.0156282	0.346847	1.52017e-10	1.55491e-09	Sema3c/Wnk1/Fstl4/Tnfrsf12a/Ret/Nrp1/Fn1/Twf2/Sema6b/Xk/Cxcl12/Wnt5a/Ifrd1/Ngf/Lrrc8a/Bdnf/Ulk2/Ttl/Sema6d/Map1b/Mgll/Ptprs/Rab21/Apoe/Creb1/Clcn3/Ogt/Sema6a/Aqp1/Sema3g/Ntn1/Cfl1/Trpv2/Mtpn/Clasp2/Tsc1/Zfyve27/Rgma/Sema3b/Gnb3/Cdk4/Akt1/Slit2/L1cam/Epha7/Dbn1/Sema7a/Sema5a/Rapgef3/Ulk1/Cav3/Ttc3/Plxna4/Limk1/Slc12a2/Macf1/Olfm1/Rap1gap2/Cyfip1/Eif2b2/Cln8/Akt3/Arhgap32/Eif4g2/Shtn1/Akt1s1/Sema6c…	77
GO:0014909	smooth muscle cell migration	0.0099452	0.422414	1.5709e-10	1.60153e-09	Postn/Cyp1b1/Igfbp3/Tmsb4x/Ddr2/S100a11/Zfp950/Egr1/Myh9/Igfbp5/Grb10/Bmpr1a/Sema6d/Cav1/Plat/Ace/Myc/Parva/Plau/Plxna1/Rapgef4/Smo/Lpar1/Camk2d/Bcl2/Trib1/S1pr2/Slit2/Fgf9/Mef2c/Rapgef3/Mdm2/Ptk2/Vtn/Dock7/Ndrg4/Agt/Dock4/Igf1/Ppargc1a/Abhd2/Dock5/P2ry6/Iqgap1/Ddit3/Pdgfd/Rhoa/Gstp2/Nf1	49
GO:0043244	regulation of protein-containing complex disassembly	0.01096	0.402985	1.60088e-10	1.62676e-09	Nes/Lmod3/Bnip3/Wnk1/Tom1/Spta1/Trim54/Clasp1/Twf2/Trpv4/Dysf/Add3/Irgm1/Irak3/Carmil1/Map1b/Nav3/Lmod2/Eps8/Cfl1/Insr/Mtpn/Capza1/Clasp2/Ogfod1/Swap70/Apc2/Igf1r/Zmpste24/Tmod3/Stmn2/Ttbk2/Shroom2/Per2/Rubcn/Evl/Sema5a/Atg5/Clec16a/Tmod4/Capzb/Asph/Taok1/Setx/Dmtn/Wdr1/Sptb/Actn2/Gas2l1/Gspt1/Atxn7/Scaf8/Sptan1/Tecpr1	54
GO:0007266	Rho protein signal transduction	0.011163	0.398551	1.79343e-10	1.81649e-09	Col3a1/Cnksr1/Baiap2/Col1a2/Adrb1/Bcl6/Nrp1/Adgrg1/Synpo2l/Cdc42ep2/Abra/Arhgdib/Cdc42ep4/Tnfaip1/Flcn/Synj2bp/Arhgef12/Apoe/Lpar6/Eps8/Ntn1/Lpar1/Abca1/Eps8l1/Chuk/Rhobtb1/Heg1/Rhou/Ripor2/Cdc42/Scai/Stard13/Gpr17/Gpr4/Cdc42ep3/Tns3/Mcf2l/Arhgef28/Stmn1/Pdpn/Myo9b/Cdh2/Pecam1/Celsr1/Rhoj/Hacd3/Itgb1/Arrb1/Arhgap32/Shtn1/Rock2/Ripor1/Rhoa/Rtkn/Rasip1	55
GO:0008637	apoptotic mitochondrial changes	0.0101482	0.416667	1.84786e-10	1.86554e-09	Bcl2l1/Bnip3/Fas/Hspd1/Ppif/Mllt11/Trp53/Gclm/Pdcd5/Them4/Bmf/Mcl1/Lmna/Bok/Bcl2/Sfn/Slc25a4/Akt1/Arrb2/Bak1/Opa1/Prelid1/Prkn/Gclc/Hip1r/Psmd10/Igf1/Wdr35/Fis1/Bcl2l11/Mapk9/Tnfsf10/Pink1/Fam162a/Parl/Eya2/Camk2a/Cd24a/Dnm1l/Jun/Mul1/Ggct/Slc35f6/Triap1/Aifm2/Rnf7/Sod2/Gpx1/Higd1a/Rhot1	50
GO:0010976	positive regulation of neuron projection development	0.01644	0.338912	1.88218e-10	1.89404e-09	Itga6/Baiap2/Ddr2/Eef2k/Ret/Cux2/Nrp1/Adam17/Ankrd1/Serpinf1/Sphk1/Twf2/Kalrn/Marcks/Wnt5a/Afdn/Caprin1/Bmp4/Ngf/Plxnb3/Bdnf/Atp1b2/Cflar/Fig4/Apoe/Nck1/Ehd1/Dhx36/Lyn/Reln/Ddx56/Ppp1r9a/Rgma/Tenm3/Ptk2b/Igf1r/Sf3a2/Stmn2/Flna/Dbn1/Atp8a2/Arsb/Cpeb1/Opa1/Ror1/Sirt1/Ndrg4/Rapgef1/Agt/Ube2v2/Cx3cl1/Ranbp1/Fyn/Camk1/Setx/Cyfip1/Amigo1/Cd24a/Dnm1l/Caprin2/Epor/Dpysl3/Nptn/Enc1/Tmem30a/Ppp2r5d/Actr2/C…	81
GO:0051216	cartilage development	0.0156282	0.345291	1.93702e-10	1.93735e-09	Col3a1/Ogn/Serpinh1/Col1a1/Ccn2/Loxl2/Pth1r/Bgn/Scx/Twsg1/Sik3/Mkks/Rflnb/Ptpn11/Ddrgk1/Trpv4/Zbtb16/Pbxip1/Wnt5a/Bmp4/Bmp6/Col27a1/Sulf1/Fgfr3/Bmpr1a/Prkca/Ift80/Ext1/Fgf2/Prrx1/Hspg2/Cfh/Nfatc2/Fosl2/Tgfbr2/Sox6/Smad9/Slc26a2/Efemp1/Thbs1/Mustn1/Adamts7/Trps1/Thrb/Trip11/Fgf18/Tgfb1/Zeb1/Zmpste24/Rarb/Fgf9/Mef2c/Lnpk/Tgfb2/Smad7/Snai2/Mgp/Carm1/Bmp1/Chsy1/Cytl1/Mapk14/Mia3/Smad3/Bpnt2/Bbs1/Gnas…	77
GO:0032869	cellular response to insulin stimulus	0.0154252	0.347032	1.93768e-10	1.93735e-09	Ptprf/Pik3r1/Eif4ebp1/Hdac9/Ahsg/Sesn3/Stxbp4/Ptpn11/Marcks/Inpp5k/Sco1/Grb14/Grb10/Socs3/Prkca/Appl1/Osbpl8/Tns2/Slc2a8/Sorbs1/Ogt/Nck1/Prkcd/Tbc1d4/Irs2/Eprs1/Lpl/Insr/Cav2/Parp1/Pde3b/Csrp3/Ankrd26/Igf1r/Akt1/Gpam/Snx5/Map2k1/Pdk2/Inppl1/Rab31/Ptpra/Cpeb1/Opa1/C2cd5/Soga1/Appl2/Sirt1/Rhoq/Agt/Zbtb7b/Eif4ebp2/Grb2/Lpin2/Sgcb/Myo1c/Cyfip1/Akt3/Xbp1/Pdpk1/Srebf1/Slc27a1/Insig2/Sos2/Capn10/Prkaa1/…	76
GO:0006338	chromatin remodeling	0.0282119	0.284254	2.05793e-10	2.05099e-09	H1f2/Loxl2/Hdac9/Actb/Bcl6/Tspyl2/Nr3c1/Tet1/Mthfr/Mcm2/Zfp110/Per1/Eif1/Kdm4b/Actr8/Ndn/Morf4l1/Kmt2b/N6amt1/Lrif1/Ino80c/Trp53/Zfp445/Nudt5/Jarid2/Supt5/Ubr2/Yeats2/Psip1/Chd6/Myc/Ezh1/Hdac2/Ogt/Nfrkb/Chd7/Uchl5/Zfp827/Smarcb1/Wbp2/Lmnb2/Dnmt1/Chd2/Bcl7c/Rbbp5/Mecp2/Setd7/Lmna/Suv39h1/Rest/Dnmt3a/Rere/Uty/Smarca5/Bcl7b/Tasor2/Glmn/Zmpste24/Mcrs1/Resf1/Hdgfl2/Daxx/Prdm16/Per2/Ruvbl2/Top1/Lmnb1/I…	139
GO:0002757	immune response-activating signaling pathway	0.0259793	0.290909	2.09646e-10	2.08271e-09	Pik3r1/Irf7/Plscr2/Btnl9/Wnk1/Ninj1/Ddx60/Dusp3/Gbp2/Ptprc/Ighm/Pde4b/Tspan6/Hspd1/Cmtm3/Colec12/Tnip2/Irgm1/Nfkbia/Riok3/Irak3/Ube2n/Cav1/Appl1/Lacc1/Ptprs/Plcg2/Vav3/Znrf1/Nop53/Ifi35/Gps2/Nfatc2/Fosl2/Csk/Nr1d1/Thy1/Mapkapk3/Unc93b1/Lat2/Slc39a10/Eif2b3/Cd276/Cblb/Lyn/Nploc4/Trim3/Rnf31/Cd38/Chuk/Plscr1/Lbp/Alpk1/Bcl2/Ap3b1/Rftn1/Tlr3/Slc15a3/Dusp22/Eif2b5/Tnfrsf21/Arrb2/Traf6/Lgals3/Atat1/Tra…	128
GO:0060998	regulation of dendritic spine development	0.00811853	0.465116	2.22968e-10	2.20801e-09	Baiap2/Eef2k/Fstl4/Cux2/Kalrn/Marcks/Nr3c1/Afdn/Caprin1/Ptprs/Apoe/Hdac2/Dhx36/Cfl1/Reln/Dnm3/Lpar1/Mecp2/Dtnbp1/Ppp1r9a/Plk2/Palm/Mef2c/Dbn1/Opa1/Itsn1/Crebbp/Efna1/Camk1/Pbrm1/Dnm1l/Llph/Caprin2/Actr2/Eif4g2/Mapk6/Bhlhb9/Actr3/Tanc2/Camk2b	40
GO:0048193	Golgi vesicle transport	0.0184697	0.323843	2.29306e-10	2.26356e-09	Whamm/Myo1b/Gas1/Lrrk2/Kdelr3/Dipk2a/Sec24d/Pgap1/Sec23a/Hyou1/Lman2l/Mia2/Sec22c/Optn/Lman1/Bet1l/Tbc1d20/Steep1/Uvrag/Csk/Rp2/Slc30a6/Pitpnb/Plpp3/Cnih4/Sar1a/Kdelr2/Lman2/Use1/Exoc4/Trappc2/Trip11/Gabarapl2/Arfgap3/Golga2/Cog5/Arfgef2/Rab31/Gbf1/Plcb3/Yipf6/Bicd2/P4hb/Yipf7/Cog6/Kif16b/Pdcd6/Sgsm2/Rab8b/Sec23b/Macf1/Copb1/Ergic2/Golga5/Arf4/Vamp3/Mia3/Arfrp1/Rab33b/Chic2/Rab34/Vamp5/Bbs1/Nbas/…	91
GO:0120032	regulation of plasma membrane bounded cell projection assembly	0.0150193	0.349057	2.46233e-10	2.42296e-09	Fscn1/Pik3r1/Arap1/Nrp1/Twf2/Cdc42ep2/Plxnb3/Kctd17/Intu/Odf2/Dynll1/Pfn2/Cdc42ep4/Cav1/Cep97/Sdccag8/Crocc/Cenpj/Aqp1/Prkcd/Eps8/Syne2/Cfl1/Odf2l/Dnm3/Ift20/Lpar1/Eps8l1/Abi2/Cntrob/Atmin/Ppp1r9a/Plce1/Wasf2/Ripor2/Nckap1/Akt1/Cdc42/Yap1/Slit2/Palm/Ttbk2/Abitram/Bin3/Evl/Dbn1/Tgfb3/Ift46/Fxr2/Cdc42ep3/Atg5/Rhoq/Tchp/Anln/Capzb/Coro1c/Cyfip1/Auts2/Arf4/Dmtn/Dync2li1/Ift140/Rala/Dpysl3/Actr2/Mark4…	74
GO:0002764	immune response-regulating signaling pathway	0.0263852	0.288889	2.50535e-10	2.45752e-09	Pik3r1/Irf7/Plscr2/Btnl9/Wnk1/Ninj1/Ddx60/Dusp3/Gbp2/Ptprc/Ighm/Pde4b/Tspan6/Hspd1/Cmtm3/Colec12/Tnip2/Irgm1/Nfkbia/Il20rb/Riok3/Irak3/Ube2n/Cav1/Appl1/Lacc1/Ptprs/Plcg2/Vav3/Znrf1/Nop53/Ifi35/Gps2/Nfatc2/Fosl2/Csk/Nr1d1/Thy1/Mapkapk3/Unc93b1/Lat2/Slc39a10/Eif2b3/Cd276/Cblb/Lyn/Nploc4/Trim3/Rnf31/Cd38/Chuk/Plscr1/Lbp/Alpk1/Bcl2/Ap3b1/Rftn1/Tlr3/Slc15a3/Dusp22/Eif2b5/Tnfrsf21/Arrb2/Traf6/Lgals3/At…	130
GO:0071456	cellular response to hypoxia	0.0101482	0.413223	2.62959e-10	2.57127e-09	Egln3/Hif3a/Eif4ebp1/Ak4/Bnip3/Fndc1/Egr1/Zfas1/Epha4/Kcnk2/Gata6/Cited2/Rgcc/Hyou1/Tigar/Trp53/Nop53/Myc/Ogt/Aqp1/Kcnd2/Kcnk3/Suv39h1/Dnmt3a/Bcl2/Tgfb1/Rora/Akt1/Egln2/Map2k1/Daxx/Cr1l/Ptgis/Mlst8/Cpeb1/Sirt2/Sirt1/P4hb/Ajuba/Npepps/Pgk1/Bmyc/Pink1/Fam162a/Ado/Epas1/Rock2/Commd1/Gnb1/Higd1a	50
GO:0009411	response to UV	0.0121778	0.379747	2.7438e-10	2.67453e-09	Cdkn1a/Cirbp/Pik3r1/Trp53inp1/Ccnd1/Mme/Mmp3/Uvssa/Ercc1/Hus1/Trp53/Mmp2/Casp3/Bmf/Xpc/Cul4b/Aqp1/Prkcd/Rev1/Dhx36/Parp1/Hmgn1/Fbxw7/Bcl2/Akt1/Ruvbl2/Bak1/Agap3/Mapk11/Rhbdd1/Cdkn2d/Mettl3/Uaca/Sprtn/Ppid/Sirt1/Crebbp/Stk11/Casp7/Sdf4/Mapk9/Xpa/Nfatc4/Actr5/Mapk14/Rad18/Wrn/Mapk8/Ube2a/Map3k20/Polk/Bcl3/Prkaa1/Map3k4/H2ac25/Smpd1/Brca2/Triap1/Egfr/Gpx1	60
GO:0006399	tRNA metabolic process	0.0133956	0.364641	2.76082e-10	2.68272e-09	Trmt1l/Cars2/Trmt2b/Hsd17b10/Ankrd16/Tsen15/Dars2/Wdr6/Mto1/Yars2/Rpp25/Pnpt1/Trmt1/Eprs1/Trmt12/Nsun4/Vars1/Tyw3/Nsun2/Tars2/Akt1/Lsm6/Ddx1/Ctu2/Cdk5rap1/Polr3d/Cdkal1/Dus4l/Lrrc47/Wars2/Nat10/Pop7/Dus1l/Ptcd1/Aars1/Qtrt1/Rpp25l/Thada/Trmt6/Thumpd2/Kars1/Vars2/Clp1/Sars1/Trnt1/Exosc2/Dus3l/Osgep/Trpt1/Thumpd1/Hars2/Rtcb/Rtraf/Trmu/Nars1/Tsen34/Trmt11/Tars3/Yrdc/Tsen54/Pars2/Rars1/Ears2/Qrsl1/Exo…	66
GO:0009615	response to virus	0.0235437	0.298201	2.85103e-10	2.76174e-09	Bcl2l1/Lcn2/Ifit1/Irf7/Plscr2/Ifngr2/Bnip3/Apobec3/Fv1/Ddx60/Ifit3/Serinc3/Ifit3b/Ptprc/Mx2/Tspan6/Htra1/Cxadr/Ddit4/Stat2/Uri1/Vamp8/Irgm1/Riok3/Irak3/Ube2n/Trim7/Ext1/Ifitm1/Ptprs/Ndufaf4/Unc93b1/Usp20/Mlkl/Nck1/Dhx36/Nploc4/Garin5a/Ifit1bl2/Exosc5/Ddx56/Aup1/Abcc9/Chuk/Plscr1/G3bp1/Bcl2/Tgfb1/Il15/Tlr3/Nt5c3/Trim65/Zmpste24/Ifnlr1/Traf6/Gpam/Ddx1/Traf3/Abcf3/Trim13/Rtp4/Mapk11/Polr3d/Oas1b/Ada…	116
GO:0051099	positive regulation of binding	0.0142074	0.35533	3.04227e-10	2.93784e-09	Spta1/Plxnd1/Ddrgk1/Lrrk2/Wnt5a/Anxa2/Map1lc3b/Bmp4/Epha4/Ngf/S100a10/Ramp2/Bdnf/Hipk1/Tmem132a/Cav1/Apoe/Ace/Med25/Myc/Mfng/Gpsm1/Parp1/Tgfb1/Plk2/Lfng/Ripor2/Traf6/Epb41/Stk3/Tgfb2/Rapgef3/Bambi/Sirt2/Dazap2/Blk/Tns3/Prkn/Vtn/Cald1/Sting1/Hip1r/Nvl/Dact1/Usp9x/Hspa4/Ip6k2/Igf1/Mark3/Stmn1/Eif2b1/Caprin2/Eif3e/Arrb1/Ebf2/Dhx9/Gtf2b/Brd4/Nphp3/Ralb/Ripor1/Epb41l5/Cldn5/Actr3/Edf1/Rara/Tcf7l2/Eif2…	70
GO:0016241	regulation of macroautophagy	0.0099452	0.415254	3.22325e-10	3.10298e-09	Sesn1/Bnip3/Kdr/Tom1/Sesn3/Hmox1/Lrrk2/Qsox1/Irgm1/Bag3/Tigar/Trp53/Optn/Wdr45/Supt5/Ehmt2/Usp30/Sptlc2/Gpsm1/Tsc1/Rnf31/Epm2a/Slc25a4/Trim13/C9orf72/Rubcn/Nrbp2/Scoc/Fez2/Ulk1/Atg5/Prkn/Sirt1/Prkaa2/Sting1/Clec16a/Tlr2/Pink1/Snx18/Lrsam1/Atg14/Ubqln2/Sec22b/Ralb/Tbk1/Dcn/Rufy4/Pip4k2b/Tecpr1	49
GO:0007249	canonical NF-kappaB signal transduction	0.0172519	0.329457	3.40926e-10	3.27192e-09	Tfrc/Cd74/Sqstm1/Ddrgk1/Wnt5a/Eda2r/Per1/Erc1/Tnip2/Irgm1/Nfkbia/Casp8/Riok3/Sirpa/Ube2n/Cth/Plcg2/Nfkbib/Optn/Nr1d1/Usp20/Dhx36/Tmem106a/Dnaja3/Parp1/Rnf31/Chuk/Alpk1/Jmjd8/Tlr3/Rora/Akt1/Arrb2/Traf6/Ddx1/Traf3/Trim13/Sphk2/Card6/Ednrb/Angpt1/Stat1/Ror1/Ltbr/Prkn/Sirt1/Ajuba/Ripk3/Dhx15/Lurap1l/Agt/Cx3cl1/Tnfrsf19/Irf1/Fyn/Trim25/Relb/Tlr2/Tnfsf10/Pink1/Tnfaip3/Terf2ip/Zfand6/Eda/Card9/Rassf2/Ub…	85
GO:0002064	epithelial cell development	0.01644	0.334711	3.73387e-10	3.57243e-09	Myadm/S1pr3/Gata2/Vim/Kdr/Gja1/Wnt5a/Afdn/Bmal1/Bmp4/Map7/Bmp6/Col27a1/Fgfr3/Adamtsl4/Atf4/Myo1e/Adrm1/Ptprs/Sipa1/Tigar/Col18a1/Akap11/Tbc1d20/Fosl2/Fat1/Smo/Abi2/Hsd17b4/Tgfb1/Ppp1r16b/S1pr2/Heg1/Sfn/Sox18/Dll1/Asxl1/Abca12/Flna/Yap1/Rarb/Cdk6/Vezf1/Zdhhc21/Sidt2/Frmd6/Ednrb/Rapgef3/Gpr4/Yipf6/Flnb/Rap2c/Rapgef1/Agt/Ift74/Gpat4/Xbp1/Epas1/Pdpk1/Clic4/B4galt1/Cdh2/Pecam1/Akr1b1/Dmd/Rock2/Tjp1/Cc…	81
GO:0001503	ossification	0.027806	0.283058	3.77142e-10	3.59728e-09	Lox/Col1a1/Ccn2/Col1a2/Pth1r/Igfbp3/Tent5a/Ddr2/Alpl/Scx/Twsg1/Limd1/Sik3/Ahsg/Gpm6b/Rflnb/Ptpn11/Tmem38b/Gja1/Zbtb16/Wnt5a/Dchs1/Sbds/Cebpd/Bmp4/Zfp932/Igfbp5/Ipo7/Bmp6/Intu/Alox5/Fgfr3/Bmpr1a/Ift80/Atf4/Ext1/Plxnb1/Tmem64/Fgf2/Ifitm1/Trp53inp2/Aspn/Hspg2/Vegfc/Tob1/Xylt1/Map2k6/Csf1r/Fosl2/Mmp2/Wnt11/Mmp14/Slc26a2/Clic1/Cd276/Dhx36/Csf1/Adamts7/Sbno2/Smo/Lmna/Suv39h1/Rest/Sfrp1/Thrb/Fgf18/Bcl2/…	137
GO:0016197	endosomal transport	0.0162371	0.336134	3.80036e-10	3.6138e-09	Bcl2l1/Tom1/Heatr5b/Ehd2/Lrrk2/Heatr5a/Ehd4/Rhobtb3/Vps16/Erc1/Tbc1d17/Tmem50a/Tbc1d5/Rab7/Washc1/Tbc1d10c/Zfyve16/Ap1s2/Picalm/Bet1l/Tamalin/Als2cl/Snx27/Washc4/Ehd1/Agap2/Rnf126/Abca1/Washc2/Laptm4b/Chmp6/Vps53/Lrba/Cdc42/Snx5/Bves/Dctn1/Gbf1/Tmem50b/Ubxn6/Snx9/Leprotl1/Itsn1/Chmp4b/Micall2/Ndrg4/Reps1/Tmcc1/Clec16a/Chmp2a/Sgsm2/Rab8b/Dennd1a/Grip2/Cltc/Evi5/Rilp/Coro1c/Snx18/Vamp3/Dnm1l/Ap5m1/…	80
GO:0051147	regulation of muscle cell differentiation	0.0123808	0.374233	3.89059e-10	3.68832e-09	Pi16/Tcf23/Hdac9/Lmod3/Tmsb4x/Adrb1/Ccnd2/Nid1/Rgs4/Nr3c1/Bmp4/Cyp26b1/Bdnf/Lamb1/Bmpr1a/Cth/Csf1r/Nfatc2/Efnb2/Mmp14/Sox6/Efemp2/Lamc1/Dnmt1/Mecp2/Csrp3/Akap6/Bcl2/Tgfb1/Bhlhe41/Rpl3l/Zeb1/Dll1/Slc25a4/Arrb2/Daxx/Fgf9/Mef2c/Trip10/Cdk9/Lama2/Tshz3/Ctdp1/Mdm2/Cav3/Mamstr/Sirt1/Naca/Rbpms2/Pias1/Igf1/Camk1/Xbp1/Mapk14/Zbed6/Smyd1/Rcan1/Med28/Msx1/Smad1/Sod2	61
GO:0050821	protein stabilization	0.0144104	0.351485	3.96889e-10	3.75111e-09	Cd74/Pik3r1/Clu/Stxbp4/Crtap/Gpihbp1/Sox17/Epha4/Hspd1/Tnip2/Irgm1/Pfn2/Atp1b2/Apbb2/Bag3/Rab21/Trp53/Nop53/Creb1/Calr/Plpp3/Get1/Usp2/Ank2/Pyurf/Smo/Dnaja3/Tsc1/Fbxw7/Nckap1/Ccnh/Nlk/Flna/Tyrobp/Stk3/Smad7/Bag6/Prkn/Gtpbp4/Hip1r/Usp9x/Ip6k2/Prkra/Mtrr/Wdr81/Efna1/Igf1/Zswim7/Stxbp1/Bag5/Pink1/Hip1/Smad3/Pdcl3/Rassf1/Pim1/Telo2/Cdc37l1/Rassf2/Tesc/Mul1/Tbrg1/Cct6a/Tmem88/Pex6/Msx1/Gapdh/Cdk7/Creb…	71
GO:0032872	regulation of stress-activated MAPK cascade	0.0146134	0.349515	3.9973e-10	3.76652e-09	Ccn2/Xdh/Fgd4/Dusp3/Sphk1/Dab2/Trpv4/Wnt5a/Zfp110/Bmp4/Fas/Eda2r/Per1/Fktn/Ephb1/Ccr2/Sirpa/Dusp1/Dixdc1/Rap2a/Gps2/Prdx1/Aida/Klhl31/Dnaja1/Taok3/Zfp622/Sfrp1/Tnik/Dusp10/Ptk2b/Tlr3/Igf1r/Dusp22/Nppa/Map4k2/Akt1/Cdc42/Map2k1/Lmnb1/Stk3/Tgfb2/Prmt1/Ltbr/Gadd45b/Cav3/Rapgef1/Dact1/Tnfrsf19/Dusp16/Sh3rf1/Mturn/Taok1/Mapk9/Hmgcr/Card9/Cops5/Rassf2/Tirap/Arl6ip5/Mapk8ip1/Traf4/Map3k4/Mdfic/Egfr/Gstp2…	72
GO:0043524	negative regulation of neuron apoptotic process	0.0148163	0.347619	4.01239e-10	3.76931e-09	Nes/Mt1/Bcl2l1/Lcn2/Retreg1/Hsph1/Ccnd1/Unc5b/Clu/Kdr/Nrp1/Plxnd1/Lgmn/Hmox1/Coro1a/Ngf/Adora2a/Hspd1/Bdnf/Xiap/Atf4/Sod1/Hyou1/Optn/Xrcc2/Zpr1/Apoe/Gclm/Cntfr/Fbxo7/Agap2/Smo/Mecp2/Clcf1/Bok/Bcl2/Ptk2b/Arrb2/Lig4/Mef2c/Tgfb3/Angpt1/Nrbp2/Pcdhgc3/Itsn1/Prkn/Sirt1/Gclc/Agt/Ube2v2/Cx3cl1/Aars1/Fyn/Rad21/Stxbp1/Ppargc1a/Nfatc4/Pink1/Cln8/Pdpk1/Epor/Gpi1/Nmnat1/Ntf3/Kras/Arrb1/Jun/Bhlhb9/Rhoa/Erbb3/S…	73
GO:0045786	negative regulation of cell cycle	0.0239497	0.295	4.16171e-10	3.89781e-09	Cdkn1a/Fam107a/Rps6ka2/Tent5b/Ccnd1/Fbxo31/Ints7/Ets1/Nacc2/Nek1/Ptpn11/Gas1/Miip/Prmt2/Ctdsp2/Dync1li1/Bmp4/Grb14/Btg3/Fgfr3/Syf2/Cdk5rap3/Apbb2/Rgcc/Ccng1/Hus1/Fhl1/Trp53/Nop53/Prpf19/Gpnmb/Casp3/Xpc/Tfap4/Taok3/Fbxo7/Ptpn3/Gmnn/Suv39h1/Eme2/Nsun2/Bcl2/Atm/Xrcc3/Tgfb1/Creb3l1/Smarca5/Epm2a/Rpa2/Etaa1/Rbbp8/Crlf3/Timeless/Nabp2/Cdk5rap1/Cdk6/Cdkn2d/Atrip/Cdc5l/Mov10l1/Heca/Mdm2/Ppp1r10/Rnf167/Ta…	118
GO:0048284	organelle fusion	0.0127867	0.368421	4.2722e-10	3.98928e-09	Doc2b/Tfrc/Bnip3/Tom1/Sphk1/Vps11/Coro1a/Dysf/Vps16/Erc1/Vamp8/Oma1/Samd9l/Rab7/Pla2g5/Vav3/Cidea/Uvrag/Septin8/Usp30/Mcl1/Rab20/Tbc1d4/Grik5/Cav2/Fer1l5/Chmp6/Bak1/Miga2/Cplx2/Rab3a/Opa1/C2cd5/Chmp4b/Prkn/Yipf7/Chmp2a/Pla2g4a/Rab8b/Fis1/Stxbp1/Parl/Vamp3/Dnm1l/Snap47/Rab34/Chmp1b2/AU040320/Chmp1b/Snap29/Stx8/Snap23/Mul1/Ankrd27/Sec22b/Yipf4/Vcpip1/Eea1/Syt3/Syt11/Syt7/Pip4k2b/Chmp5	63
GO:0050920	regulation of chemotaxis	0.01644	0.333333	4.67223e-10	4.34975e-09	Fgf16/Cd74/Smoc2/Sema3c/Wnk1/Ninj1/Kdr/Nrp1/Adam17/Lgmn/Dusp3/Rin3/Fn1/Trpv4/Sema6b/Cxcl12/Wnt5a/Jam3/Ppm1f/Dysf/Adam10/Prkca/Ccr2/Dusp1/Sema6d/Fgf2/Vegfc/St6gal1/Calr/Csf1r/Efnb2/Sema6a/Thbs1/Sema3g/Csf1/Lyn/Lpar1/Lbp/Fgf18/Pla2g7/Sema3b/Tgfb1/Swap70/Ptk2b/Mcu/Ripor2/Slit2/Mpp1/Angpt2/Sema7a/Sema5a/Snai2/Ptk2/Mmp28/Mtus1/Plxna4/Cx3cl1/Cxcl14/Nedd9/Creb3/Thbs4/Dnm1l/Smad3/C3ar1/Usp14/Tirap/Camk1d…	81
GO:0010508	positive regulation of autophagy	0.0121778	0.375	4.91191e-10	4.55659e-09	Sesn1/Trp53inp1/Bnip3/Atg101/Kdr/Tom1/Sesn3/Sqstm1/Atg13/Hmox1/Lrrk2/Foxo3/Rnf152/Irgm1/Ulk2/Flcn/Bag3/Optn/Wdr45/Supt5/Usp20/Fbxo7/Sptlc2/Gpsm1/Smo/Tsc1/Svip/Rnf31/Plk2/Epm2a/Trim65/Slc25a4/Map2k1/Trim13/C9orf72/Scoc/Ulk1/Prkn/Sirt1/Prkaa2/Sting1/Tpcn1/Clec16a/Sh3bp4/Stk11/Bcl2l11/Tlr2/Pink1/Snx18/Lrsam1/Xbp1/Prkaa1/Ddit3/Trim5/Ralb/Tbk1/Dcn/Rufy4/Depdc5/Pip4k2b	60
GO:1903522	regulation of blood circulation	0.0176578	0.324627	4.92371e-10	4.55659e-09	Myh7/Ccn2/Pik3r1/Ptgs1/Apln/Adrb1/Tmem65/Snta1/Tmem38b/Gja1/Rgs4/Scn4b/Pde4b/Cacnb2/Bin1/Gja5/Cxadr/Dsc2/Add3/Alox5/Prkca/Tbx5/Cav1/Mgll/Ace/Mmp2/Smtn/Kcnh2/Tnni3k/Ank2/Kcnd2/Tnnt2/Gpd1l/Abcc9/Cd38/Pde5a/Hcn4/Thrb/Csrp3/Akap6/Zmpste24/Casq2/Nppa/Irx3/Akt1/Flna/Map2k1/Per2/Bves/Zdhhc21/Tgfb2/Smad7/Ednrb/Mdm2/Kcnj2/Hrc/Strit1/Sp4/Atp1a1/Cav3/Rnf207/Sirt1/Kcnd3/Gjc1/Agt/Cx3cl1/Dock4/Ctnna3/Kcnj8/Wdr…	87
GO:0060491	regulation of cell projection assembly	0.0150193	0.344186	5.10753e-10	4.71268e-09	Fscn1/Pik3r1/Arap1/Nrp1/Twf2/Cdc42ep2/Plxnb3/Kctd17/Intu/Odf2/Dynll1/Pfn2/Cdc42ep4/Cav1/Cep97/Sdccag8/Crocc/Cenpj/Aqp1/Prkcd/Eps8/Syne2/Cfl1/Odf2l/Dnm3/Ift20/Lpar1/Eps8l1/Abi2/Cntrob/Atmin/Ppp1r9a/Plce1/Wasf2/Ripor2/Nckap1/Akt1/Cdc42/Yap1/Slit2/Palm/Ttbk2/Abitram/Bin3/Evl/Dbn1/Tgfb3/Ift46/Fxr2/Cdc42ep3/Atg5/Rhoq/Tchp/Anln/Capzb/Coro1c/Cyfip1/Auts2/Arf4/Dmtn/Dync2li1/Ift140/Rala/Dpysl3/Actr2/Mark4…	74
GO:0046328	regulation of JNK cascade	0.0117719	0.379085	5.84012e-10	5.37269e-09	Ccn2/Fgd4/Dusp3/Dab2/Trpv4/Wnt5a/Zfp110/Eda2r/Per1/Fktn/Ephb1/Sirpa/Dixdc1/Rap2a/Gps2/Aida/Klhl31/Dnaja1/Taok3/Zfp622/Sfrp1/Tnik/Dusp10/Ptk2b/Tlr3/Igf1r/Dusp22/Nppa/Map4k2/Akt1/Cdc42/Lmnb1/Stk3/Prmt1/Ltbr/Gadd45b/Rapgef1/Dact1/Tnfrsf19/Dusp16/Sh3rf1/Mturn/Taok1/Mapk9/Card9/Cops5/Rassf2/Tirap/Mapk8ip1/Traf4/Mdfic/Egfr/Gstp2/Sh3rf2/Traf2/Mbip/Gadd45a/Dab2ip	58
GO:1904062	regulation of monoatomic cation transmembrane transport	0.022326	0.299728	5.88364e-10	5.39677e-09	Lcn2/Adrb1/Wnk1/Snta1/Selenon/Tmem38b/Zfas1/Taco1/Rgs4/Scn4b/Sco1/Kcnc1/Slc36a2/Pde4b/Cacnb2/Trpc3/Coro1a/Hecw2/Dysf/Bin1/Bmp4/Tspan13/Ngf/Alox5/Ppif/Cnksr3/Atp1b2/Kcnj11/Casq1/Cav1/Plcg2/Fhl1/Iscu/Cabp1/Thy1/Kcnip3/Kcnh2/Wnk2/Cd63/Snx27/Tmem168/Fxyd6/Ank2/Chd7/Lyn/Ptpn3/Kcnk3/Gpd1l/Crbn/Atpsckmt/Camk2d/Ahnak/Nr3c2/Abcc9/Akap6/Bcl2/Tcirg1/Tgfb1/Ptk2b/Casq2/Nppa/Slc25a4/Akt1/Flna/Plp1/Bak1/Sphk2/S…	110
GO:0019216	regulation of lipid metabolic process	0.0237467	0.29397	6.21134e-10	5.68059e-09	Apod/Fmo2/Rorc/Cd74/Igfbp7/Etfbkmt/Akr1c14/Adgrf5/Fabp5/Egr1/Pnpla2/Sphk1/Ces1d/Dab2/Flt1/Nr3c1/Bmp6/Acsl5/Erlin2/Stard4/Fgfr3/Washc1/C1qtnf2/Cav1/Sod1/Fgf2/Plcg2/Erlin1/Apoe/Gps2/Creb1/Cidea/Nr1d1/Sorbs1/Ogt/Abca7/Prkcd/Pik3ip1/Agap2/Lactb/Irs2/Lyn/Sf1/Rest/Pde3b/Thrb/Slc45a3/Ankrd26/Tgfb1/Gnb3/Rora/Igf1r/Zmpste24/Tek/Akt1/Dhcr7/Gpam/Zbtb20/Pdk2/Sphk2/Gk/Rubcn/Eif6/Mlst8/Dgat2/Nr1d2/Mtln/Fmo1/Sn…	117
GO:0007623	circadian rhythm	0.0156282	0.337719	6.28518e-10	5.73126e-09	Rorc/Dbp/Ahcy/Adrb1/Alb/Ptgds/Nos2/Egr1/Ces1d/Nudt12/Bmal1/Adcy1/Gfpt1/Csnk1e/Fas/Ngf/Adora2a/Per1/Crem/Ahcyl/Bdnf/Nampt/Cavin3/Nfil3/Cry2/Ass1/Atf4/Trp53/Dpyd/Creb1/Nr1d1/Hdac2/Ogt/Fbxl3/Cipc/Usp2/Kcnd2/Parp1/Suv39h1/Fbxw7/Bhlhe41/Ciart/Rora/Per2/Timeless/Top1/Dyrk1a/Nr1d2/Klf10/Mettl3/Sirt1/Prkaa2/Usp9x/Atf5/Igf1/Naglu/Setx/Relb/Mapk9/Ppargc1a/Noct/Mat2a/Srebf1/Kdm5c/Mapk8/Ppp1ca/Rock2/Fxr1/Prk…	77
GO:0006605	protein targeting	0.0192815	0.313531	6.50675e-10	5.91596e-09	Clu/Herpud1/Stxbp4/Sqstm1/Gbp2/Lrrk2/Inpp5k/Timm21/Ywhaq/Hspd1/Srp68/Ncoa4/Zdhhc4/Irgm1/Agk/Tomm5/Os9/Vps37b/Rab7/Tomm40l/Get4/Bag3/Timm22/Pex16/Zfyve16/Kcnb1/Synj2bp/Trak2/Chm/Pdcd5/Ogt/Get1/Fbxo7/Man1a/Zdhhc9/Snx16/Exoc4/Spcs3/Fbxw7/Srp54c/Sec63/Ap3b1/Vps53/Tomm20/Sgta/Rtp4/Hspa1l/Tcaf1/Stom/Tcaf2/Zdhhc21/Ywhaz/C2cd5/Large1/Get3/Chmp4b/Bag6/Sirt4/Pmpcb/Usp9x/Hspa4/Naca/Rab8b/Sec61a2/Macf1/Fyn/E…	95
GO:0014812	muscle cell migration	0.0105541	0.396947	6.59685e-10	5.98038e-09	Postn/Cyp1b1/Igfbp3/Tmsb4x/Ddr2/S100a11/Zfp950/Egr1/Myh9/Igfbp5/Grb10/Bmpr1a/Sema6d/Cav1/Plat/Ace/Myc/Parva/Plau/Plxna1/Rapgef4/Smo/Lpar1/Camk2d/Bcl2/Trib1/S1pr2/Slit2/Fgf9/Mef2c/Bin3/Rapgef3/Mdm2/Ptk2/Vtn/Dock7/Ndrg4/Naca/Agt/Dock4/Igf1/Ppargc1a/Thbs4/Abhd2/Dock5/P2ry6/Iqgap1/Ddit3/Pdgfd/Rhoa/Gstp2/Nf1	52
GO:0072593	reactive oxygen species metabolic process	0.0170489	0.326848	6.69398e-10	6.0508e-09	Cdkn1a/Lcn2/Ccn2/Sesn1/Cyp1b1/Nnt/Xdh/Pxdn/Rab27a/Bnip3/Akr1c14/Nos2/Prcp/Lrrk2/Foxo3/Nqo1/Mmp3/Ddit4/Hspd1/Dcxr/Alox5/Pon3/Abcb7/Pla2r1/Cyb5r4/Nqo2/Cflar/Sod1/Plcg2/Tigar/Trp53/Cbr1/Gpx3/Nrros/Clcn3/Prdx1/Tgfbr2/Ogt/Sh3pxd2a/Thbs1/Prkcd/Plau/Insr/Sod3/Bcl2/Tgfb1/Ptk2b/Akt1/Cycs/Acox1/Tyrobp/Sphk2/Dhfr/Eif6/Aldh2/Gbf1/Atg5/Sirt2/Prkn/Sirt1/Ripk3/Agt/Prex1/Grb2/Fyn/Naglu/Ccs/Ncf2/Arf4/Pink1/Parl/M…	84
GO:0014902	myotube differentiation	0.0113659	0.383562	6.86331e-10	6.168e-09	Hdac9/Lmod3/Adamts15/Selenon/Hacd1/Il4ra/Ehd2/Xk/Cxcl12/Myh9/Dysf/Cyp26b1/Pmp22/Acta1/Bdnf/Fktn/Cacna1s/Cflar/Cdon/Csf1r/Nfatc2/Mmp14/Myc/Ehd1/Smo/Cav2/Csrp3/Bcl2/Bhlhe41/Rpl3l/Lncpint/Ripor2/Daxx/Bin3/Myorg/Large1/Cav3/Tanc1/Mamstr/Naca/Dyrk1b/Fkrp/Igf1/Xbp1/Mapk14/Klhl40/Dock5/Flt3l/Ppp3cb/Smyd1/Dmd/Rcan1/Cd9/Stim1/Gpx1/Ptgfrn	56
GO:0046488	phosphatidylinositol metabolic process	0.0113659	0.383562	6.86331e-10	6.168e-09	Pik3r1/Pigg/Itpkb/Ttc7/Inpp5k/Lclat1/Pi4k2a/Efr3b/Socs3/Socs5/Pgap1/Sacm1l/Cish/Fgf2/Plcg2/Tmem150a/Plcd1/Fig4/Pitpnc1/Pigq/Uvrag/Dpm1/Pigs/Pgap2/Pik3c2b/Pyurf/Smg1/Pigu/Ocrl/Ip6k1/Inppl1/Pigk/Socs2/Plcb3/Pigw/Pgap3/Pigc/Ip6k2/Inpp5j/Bpnt1/Mtmr3/Ip6k3/Pigo/Mtmr2/Lpgat1/Itpkc/Cdipt/Atg14/Slc27a1/Bpnt2/Impa1/Mtmr4/Pigv/Pik3r3/Pip4k2b/Plcg1	56
GO:1903706	regulation of hemopoiesis	0.0261823	0.285398	6.88576e-10	6.17034e-09	H2-Aa/Rorc/Lox/Cd74/Pik3r1/Gata2/Actb/Ets1/Ninj1/Bcl6/Tcim/Il4ra/Itpkb/Ldb1/Ptprc/Zbtb16/Fbn1/Foxo3/Sart1/Bmp4/Cyp26b1/Fas/Tsc22d1/Fgfr3/Zbtb46/Irgm1/Nfkbia/Socs5/Casp8/Prkca/Ccr2/Tmem64/Adrm1/Creb1/Csf1r/Tgfbr2/Zfp36/Mmp14/Myc/Fbxo7/Clptm1/Csf1/Lyn/Smarcb1/Sfrp1/Leo1/Fbxw7/Brpf3/Tgfb1/Dusp10/Trib1/Il15/Ptk2b/Ap3b1/Zeb1/Ctla2a/Dll1/Traf6/Cbfb/Tyrobp/Prdm16/P4htm/Cdk6/Setd1a/Mef2c/Abcb10/Eif6/Zc3h…	129
GO:0050680	negative regulation of epithelial cell proliferation	0.0125837	0.366864	7.13032e-10	6.37113e-09	Xdh/Sparc/Ift122/Ctsl/Atoh8/Serpinf1/Gas1/Gja1/Dab2/Zfas1/Wnt5a/Flt1/Klf9/Vash1/Bmp4/Intu/Sulf1/Alox5/Fgfr3/Ift80/Flcn/Cav1/Rgcc/Nppb/Dll4/Synj2bp/Apoe/Efnb2/Rida/Thbs1/Smo/Cav2/Sfrp1/Tgfb1/Dusp10/Zeb1/Sfn/Cdk6/Mef2c/Stk3/Tgfb2/Tgfb3/Lims1/Lims2/Snai2/Stat1/Aimp1/Col4a3/Ptch1/Stk11/Ift74/Ift57/B4galt1/Brca2/Trim24/Med1/Nf1/Tgfbr3/Krit1/Ar/Mmrn2/Dab2ip	62
GO:0048144	fibroblast proliferation	0.0115689	0.38	7.35398e-10	6.55215e-09	Cdkn1a/Col3a1/Cd74/Trp53inp1/Ddr2/Meox2/Sphk1/Fbln1/Fn1/Wnt5a/Anxa2/Cd248/Lzts2/Morf4l1/Dach1/Cav1/Zfp469/Trp53/Creb1/Fosl2/Prdx1/Med25/Myc/Aqp1/Sfrp1/Abcc9/Tgfb1/Cdk4/Zmpste24/Cdk6/Lig4/Fbrs/Fth1/Dazap1/Agt/Kcnj8/Igf1/Bmyc/Sp2/Rasa1/Inca1/Brpf1/Parp10/Rnaseh2b/B4galt7/Gas6/Jun/Nras/Dhx9/Ndufs4/Pdgfd/Egfr/Nf1/Sod2/Gpx1/Emd/Dab2ip	57
GO:0009259	ribonucleotide metabolic process	0.022123	0.299451	7.45231e-10	6.62079e-09	Bcl2l1/Myh7/Xdh/Dcakd/Ak4/Pde4a/Adcy7/Ces1d/Lrrk2/Hmgcs2/Acaca/Adcy1/Uprt/Nudt4/Nt5c1a/Acsl5/Slc25a13/Flcn/Mmut/Nppb/Prps2/Cfh/Nt5e/Nudt5/Far1/Atp6v1a/Dpyd/Ak3/Myc/Pank1/Entpd5/Adcy6/Entpd1/Gda/Atpsckmt/Parp1/Cad/Hmgcs1/Pde5a/Hsd17b4/Pfas/Adcy4/Tgfb1/Nt5c3/Rora/Nppa/Gpam/Map2k1/Pdk2/Dhodh/Sphk2/Acot11/Slc25a12/Dgat2/Ndufa2/Opa1/Cox11/Ndufa7/Prkn/Acot1/Ola1/Rhoq/Papss1/Ndufv1/Entpd4b/Adcy3/Fis1/Nm…	109
GO:0043405	regulation of MAP kinase activity	0.0140045	0.350254	8.26607e-10	7.32283e-09	Fgd4/Ptprc/Lrrk2/Wnt5a/Inpp5k/Flt1/Epha4/Spry4/Irak3/Dusp1/Cdk5rap3/Cav1/Fgf2/Apoe/Magi3/Map2k6/Tnxb/Csk/Aida/Ghr/Dnaja1/Taok3/Thbs1/Prkcd/Lyn/Fem1a/Insr/Sfrp1/Dtnbp1/Pde5a/Fgf18/Tgfb1/Dusp10/Trib1/Ptk2b/Fgd2/Trib2/Nppa/Map4k2/Traf6/Uchl1/Zeb2/Mef2c/Inppl1/Cav3/Ajuba/Agt/Ptpn6/Dusp16/Tab1/Erbb2/Cd24a/Hmgcr/Tirap/Ntf3/Kras/Fzd4/Mapk8ip1/Irak1/Map3k4/Iqgap1/Adam9/Smpd1/Pdgfd/Egfr/Gstp2/Traf2/Nf1/Da…	69
GO:0010212	response to ionizing radiation	0.0105541	0.393939	9.08865e-10	8.02867e-09	Cdkn1a/Bcl2l1/Ints7/Ccnd2/Nek1/Egr1/Ptprc/Ercc1/Tigar/Hus1/Trp53/Xrcc2/Myc/Sfrp1/Bcl2/Atm/Tgfb1/Zmpste24/Swi5/Yap1/Nabp2/Bak1/Lig4/Mdm2/Snai2/Sirt1/Tnks1bp1/Xrcc6/Grb2/Rfwd3/Stk11/Bmyc/Brcc3/Mapk14/Kars1/Wrn/Elk1/Map3k20/Trp53bp2/Rhob/Prkaa1/Babam2/Tlk2/Smpd1/Brca2/Cop1/Uimc1/Clk2/Sod2/Gpx1/Gadd45a/Inip	52
GO:0060070	canonical Wnt signaling pathway	0.0192815	0.311475	9.56224e-10	8.42309e-09	Col1a1/Wnk1/Limd1/Lmbr1l/Egr1/Nid1/Dab2/Lrrk2/Siah1a/Wnt5a/Foxo3/Bmal1/Sox17/Csnk1e/Ppp2r3a/Fgfr3/Lzts2/Xiap/Ttc21b/Ext1/Cav1/Tmem64/Fgf2/Dixdc1/Apoe/Dact3/Wnt11/Wnk2/Tle2/Hdac2/Bcl9l/Invs/Ift20/Sox7/Sfrp1/Usp34/G3bp1/Wls/Fzd2/Fam53b/Tgfb1/Apc2/Nppa/Yap1/Zeb2/Fgf9/Ptpru/Ruvbl2/Otulin/Stk3/Ednrb/Sema5a/Snai2/Bambi/Tnks2/Prkn/Rapgef1/Dact1/Mad2l2/Bicc1/Sdhaf2/Stk11/Rnf220/Rnf146/Mapk14/Ubac2/Tnks/C…	95
GO:0016311	dephosphorylation	0.0204993	0.305136	1.00698e-09	8.84513e-09	Ptprf/Ppp1r15a/Itga1/Vcan/Alpl/Mgat5/Dusp3/Ptpn11/Ptprn/Dusp6/Ptprc/Inpp5k/Ctdsp2/Ppm1f/Uri1/Ppp2r3a/Cry2/Pdp1/Sacm1l/Dusp1/Cdk5rap3/Pxylp1/Lhpp/Ptprs/Pdp2/Rngtt/Fig4/Ppm1l/Tns2/Ppm1h/Plpp3/Nck1/Slc39a10/Ptp4a3/Prkcd/Plpp5/Ptpn3/Igbp1/Tsc1/Bcl2/Hdhd2/Tgfb1/Dusp10/Swap70/Ppp1r16b/Epm2a/Mtmr14/Dusp22/Ptpa/Ppp1r2/Ptpru/Mef2c/Ocrl/Inppl1/Tgfb2/Plpp1/Ppp2r2a/Ptpra/Ctdp1/Ppm1k/Ptpn4/Tns3/Ripk3/Inpp5j/N…	101
GO:0055074	calcium ion homeostasis	0.0215141	0.300283	1.069e-09	9.36342e-09	Pth1r/Bnip3/Alpl/Tmtc2/Kdr/Herpud1/Tmtc4/Selenon/Tmem38b/Ptprc/Trpv4/Xk/Wnt5a/Ibtk/Trpc3/Coro1a/Gp1ba/Ngf/Kctd17/Erc1/1600014C10Rik/Fgfr3/Prkca/Cacna1s/Ccr2/Pacs2/Atf4/Casq1/Cav1/Tmem64/Fgf2/Grina/Plcg2/Nt5e/Plcd1/Grm1/Apoe/P2ry1/Thy1/Sgcd/Ank2/Chd7/Plcb4/Rmdn3/Lyn/Camk2d/Cav2/Csrp3/Bok/Akap6/Bcl2/Tcirg1/Tgfb1/Ptk2b/Itgav/Sv2a/Plce1/Casq2/Mcu/Flna/Bak1/Tgfb2/Mtln/Atp13a1/Hexb/Plcb3/Atg5/Hrc/Ank/C…	106
GO:0010721	negative regulation of cell development	0.0200934	0.306502	1.12657e-09	9.83998e-09	Cd74/Pik3r1/S1pr3/Gata2/Sema3c/Fstl4/Bcl6/Nrp1/Il4ra/Rflnb/Sema6b/Fbn1/Wnt5a/Ifrd1/Bmp4/Grb14/Fas/Tsc22d1/Bdnf/Fgfr3/Zbtb46/Irgm1/Bmpr1a/Socs5/Ulk2/Sema6d/Ptprs/Trp53/Trak2/Mbd1/Nr1d1/Thy1/Myc/Sema6a/Fbxo7/Sema3g/Ntn1/Lyn/Cfl1/Mecp2/Rest/Sfrp1/Fbxw7/Rgma/Sema3b/Tgfb1/Dusp10/Trib1/Cbfb/Slit2/Prdm16/Cdk6/Epha7/Zc3h8/Smad7/Zfp608/Sema7a/Idh2/Ednrb/Sema5a/Ulk1/Hlx/Snai2/Ctnna1/Ptk2/Sirt2/Cav3/Appl2/Y…	99
GO:0061387	regulation of extent of cell growth	0.0103511	0.395349	1.13323e-09	9.87049e-09	Sema3c/Fstl4/Tnfrsf12a/Nrp1/Fn1/Twf2/Sema6b/Cxcl12/Wnt5a/Ifrd1/Ngf/Bdnf/Ulk2/Ttl/Sema6d/Map1b/Mgll/Ptprs/Rab21/Apoe/Sema6a/Sema3g/Ntn1/Trpv2/Clasp2/Zfyve27/Rgma/Sema3b/Slit2/L1cam/Epha7/Dbn1/Sema7a/Sema5a/Ulk1/Ttc3/Plxna4/Limk1/Macf1/Olfm1/Cyfip1/Eif2b2/Arhgap32/Eif4g2/Shtn1/Sema6c/Sema4a/Sema3a/Mapt/Actr3/Myo5b	51
GO:0044843	cell cycle G1/S phase transition	0.0170489	0.323077	1.2597e-09	1.09414e-08	Cdkn1a/Fam107a/Cirbp/Eif4ebp1/Ccnd1/Fbxo31/Actb/Ddr2/Ccnd2/Adam17/Nacc2/Hacd1/Tcim/Stxbp4/Gas1/Prmt2/Ctdsp2/Rgcc/Appl1/Plcg2/Fhl1/Mlf1/Trp53/Zpr1/Csf1r/Eif4e/Gpnmb/Cenpj/Larp7/Myc/Cul4b/Fbxo7/Smarcb1/E2f6/Bcl7c/Camk2d/Cdk17/Bcl2/Plk2/Bcl7b/Esrrb/Rpa2/Cdk4/Rhou/Ccnh/Akt1/Rbbp8/Crlf3/Cdk6/Cdkn2d/Usp37/Mdm2/Appl2/Dact1/Pias1/Ptpn6/Crebbp/Rfwd3/Pole/Bmyc/Pbrm1/Rbl2/Pdpn/Camk2a/Rassf1/Paf1/Acvr1/Tbx2/…	84
GO:0010770	positive regulation of cell morphogenesis	0.00669779	0.492537	1.30764e-09	1.13261e-08	Ptprf/Baiap2/Fbxo31/Eef2k/Cux2/Kalrn/Marcks/Wnt5a/Afdn/Caprin1/Epha4/Rab21/Obsl1/Dhx36/Reln/Tnik/Numb/Wls/Dlg4/Dbn1/Opa1/Ptprd/Mapk9/Dnm1l/Caprin2/Actr2/Ache/Fzd4/Ankrd27/Bhlhb9/Actr3/Myo5b/Camk2b	33
GO:0051170	import into nucleus	0.0133956	0.352941	1.3288e-09	1.14774e-08	Cdkn1a/Apod/Pik3r1/Sqstm1/Lrrk2/Pkia/Bmal1/Abra/Bmp4/Kpna2/Ipo7/Nfkbia/Nup35/Cry2/Bag3/Appl1/Trp53/Hikeshi/Zpr1/Cabp1/Ranbp6/Prkcd/Cfl1/Tnpo3/Smo/Lmna/Kpna3/Ipo4/Fam53b/Tgfb1/Ing1/Epm2a/Ipo8/Tek/Akt1/Flna/Fgf9/Pola2/Agap3/Stk3/Adar/Angpt1/Uaca/Ipo5/Appl2/Agt/Il33/Cse1l/Heatr3/Xbp1/Mapk14/Kpna4/Rab23/Txnip/Dmap1/Kpna6/Prkag1/Pttg1ip/Bcl3/Eif4enif1/Mdfic/Htatip2/Tardbp/Kpna1/Med1/Nf1	66
GO:0022898	regulation of transmembrane transporter activity	0.0186726	0.312925	1.34216e-09	1.15607e-08	Adrb1/Ifngr2/Actb/Selenon/Gja1/Zfas1/Taco1/Scn4b/Sco1/Kcnc1/Pde4b/Cacnb2/Hecw2/Dysf/Bmp4/Alox5/Prkca/Ppif/Ccr2/Cnksr3/Atp1b2/Kcnj11/Casq1/Cav1/Gopc/Plcg2/Fhl1/Cabp1/Wnk2/Snx27/Tmem168/Fxyd6/Ank2/Abcb1a/Cfl1/Reln/Ptpn3/Kcnk3/Gpd1l/Crbn/Atpsckmt/Camk2d/Ahnak/Nr3c2/Abcc9/Akap6/Bcl2/Dlg4/Ptk2b/Casq2/Nppa/Slc25a4/Mef2c/Sphk2/Tcaf1/Stom/Tcaf2/Rapgef3/Gsg1l/Hrc/Strit1/Cav3/Rnf207/Gnb5/Ywhah/Rem1/Kcnj8/W…	92
GO:0000302	response to reactive oxygen species	0.0138015	0.348718	1.34928e-09	1.15898e-08	Apod/Lcn2/Sesn1/Cyp1b1/Ddr2/Bnip3/Sesn3/Sqstm1/Sphk1/Hmox1/Ptprn/Lrrk2/Foxo3/Nqo1/Mmp3/Prkca/Ppif/Sirpa/Nudt15/Capn1/Ercc6l2/Sod1/Mpv17l2/Trp53/Mmp2/Prdx1/Casp3/Hdac2/Aqp1/Prkcd/Casp6/Cfl1/Parp1/Gja3/Sod3/Chuk/Bcl2/Atm/Ptk2b/Akt1/Pdk2/Agap3/Dhfr/Adcyap1r1/Sirt1/Ripk3/Fyn/Ccs/Setx/Mapk9/Slc8a1/Pink1/Rnf146/Tnfaip3/Kpna4/Epor/Akr1b1/Mapk8/Fancc/Jun/Rhob/Prkaa1/Adprs/Adam9/Egfr/Zfp580/Sod2/Gpx1	68
GO:0070482	response to oxygen levels	0.0200934	0.305556	1.35301e-09	1.15898e-08	Egln3/Hif3a/Eif4ebp1/Loxl2/Ak4/Bnip3/Kdr/Limd1/Adam17/Fndc1/Nos2/Egr1/Hmox1/Prmt2/Zfas1/Flt1/Epha4/Fas/Ddit4/Kcnk2/Kcnj11/Gata6/Cited2/Cav1/Rgcc/Hyou1/Nppb/Fundc1/Tigar/Trp53/Nop53/Vegfc/Plat/Atp6v1a/Slc2a8/Ece1/Fosl2/Mmp2/Myc/Ogt/Aqp1/Plau/Kcnd2/Kcnk3/Mecp2/Camk2d/Suv39h1/Rest/Tsc1/Sod3/Cd38/Dnmt3a/Bcl2/Atm/Tgfb1/Rora/Tek/Akt1/Tm9sf4/Egln2/Map2k1/Atp6v1g1/Daxx/Zeb2/Cr1l/Ptgis/Mlst8/Tgfb2/Tgfb3/C…	99
GO:0008286	insulin receptor signaling pathway	0.0107571	0.386861	1.35671e-09	1.15898e-08	Ptprf/Pik3r1/Eif4ebp1/Ahsg/Sesn3/Stxbp4/Ptpn11/Marcks/Inpp5k/Grb14/Grb10/Socs3/Prkca/Appl1/Osbpl8/Tns2/Slc2a8/Sorbs1/Ogt/Nck1/Prkcd/Irs2/Insr/Cav2/Csrp3/Ankrd26/Igf1r/Akt1/Snx5/Map2k1/Pdk2/Inppl1/Ptpra/Opa1/C2cd5/Soga1/Sirt1/Rhoq/Agt/Zbtb7b/Eif4ebp2/Grb2/Pdpk1/Srebf1/Sos2/Prkaa1/Pid1/Sos1/Pik3r3/Hmga1/Slc27a4/Ctsd/Pip4k2b	53
GO:0010959	regulation of metal ion transport	0.0263852	0.281996	1.36185e-09	1.16018e-08	Lcn2/Adrb1/Wnk1/Snta1/Selenon/Tmem38b/Gja1/Zfas1/Cxcl12/Rgs4/Scn4b/Inpp5k/Kcnc1/Pde4b/Cacnb2/Trpc3/Nkain1/Coro1a/Hecw2/Dysf/Bin1/Bmp4/Tspan13/Ngf/Adora2a/Per1/Cnksr3/Atp1b2/Atf4/Casq1/Cav1/Plcg2/Fhl1/Ace/Iscu/Cabp1/Thy1/Kcnip3/Slc30a6/Kcnh2/Wnk2/Cd63/Snx27/Tmem168/Usp2/Fxyd6/Ank2/Chd7/Plcb4/Lyn/Ptpn3/Kcnk3/Gpd1l/Crbn/Trpv2/Camk2d/Ahnak/Nr3c2/Abcc9/Akap6/Bcl2/Tgfb1/Ptk2b/Casq2/Nppa/Akt1/Arrb2/Lgal…	130
GO:0032409	regulation of transporter activity	0.0192815	0.309446	1.39701e-09	1.18687e-08	Adrb1/Ifngr2/Actb/Selenon/Gja1/Zfas1/Taco1/Scn4b/Sco1/Kcnc1/Pde4b/Cacnb2/Hecw2/Dysf/Bmp4/Alox5/Prkca/Ppif/Ccr2/Cnksr3/Atp1b2/Kcnj11/Casq1/Cav1/Gopc/Plcg2/Fhl1/Cabp1/Wnk2/Snx27/Prkcd/Tmem168/Fxyd6/Ank2/Abcb1a/Cfl1/Reln/Ptpn3/Kcnk3/Gpd1l/Crbn/Atpsckmt/Insr/Camk2d/Ahnak/Nr3c2/Abcc9/Akap6/Bcl2/Dlg4/Ptk2b/Casq2/Nppa/Slc25a4/Mef2c/Sphk2/Tcaf1/Stom/Tcaf2/Rapgef3/Gsg1l/Hrc/Strit1/Cav3/Rnf207/Gnb5/Ywhah/N…	95
GO:0050775	positive regulation of dendrite morphogenesis	0.00649482	0.5	1.42829e-09	1.21014e-08	Ptprf/Baiap2/Fbxo31/Eef2k/Cux2/Kalrn/Marcks/Wnt5a/Afdn/Caprin1/Epha4/Rab21/Obsl1/Dhx36/Reln/Tnik/Numb/Wls/Dlg4/Dbn1/Opa1/Ptprd/Dnm1l/Caprin2/Actr2/Ache/Fzd4/Ankrd27/Bhlhb9/Actr3/Myo5b/Camk2b	32
GO:0019751	polyol metabolic process	0.00913335	0.416667	1.47016e-09	1.24223e-08	Pth1r/Sphk1/Itpkb/Myh9/Grk3/Dysf/Nudt4/Ppip5k1/Fgf2/Acer2/Cyp27a1/Plcg2/Myof/Plcd1/P2ry1/Plpp3/Sptlc2/Got1/Mecp2/Asah2/Ptk2b/Coq3/Sphk2/Dhfr/Gk/Ip6k1/Adcyap1r1/Inppl1/Plpp1/Dgat2/Plcb3/Itpk1/Ip6k2/Pla2g4a/Fkrp/Ip6k3/Itpkc/Pts/Asah1/Akr1b1/Impa1/P2ry6/Qdpr/Ephx1/Plcg1	45
GO:0001837	epithelial to mesenchymal transition	0.0121778	0.365854	1.50641e-09	1.26942e-08	Col1a1/Loxl2/Heyl/Rflnb/Clasp1/Lrg1/Gja1/Dab2/Wnt5a/Bmp4/Epha4/Spred2/Tgfb1i1/Rgcc/Dact3/Wnt11/Tgfbr2/Hdac2/Slc39a10/Bcl9l/Mcrip1/Sfrp1/Clasp2/Tgfb1/Glipr2/Spred1/Flna/Gcnt2/Trip10/Tgfb2/Smad7/Tgfb3/Ldlrad4/Snai2/Ddx17/Bambi/Ptk2/Pdcd6/Mad2l2/Agt/Phldb2/Sdhaf2/Efna1/Pdpn/Smad3/Tasor/Acvr1/Rock2/Klhl12/Epb41l5/Ppp2ca/Tgfbr3l/Loxl3/Mark1/Msx1/Tgfbr3/Tcf7l2/Tmem100/Tbx20/Dab2ip	60
GO:0030199	collagen fibril organization	0.00629186	0.508197	1.53714e-09	1.29181e-08	Col3a1/Lox/Serpinh1/Col1a1/P4ha1/Cyp1b1/Loxl2/Col1a2/Col14a1/Col5a1/Pxdn/Ddr2/Dpt/Emilin1/Col5a2/Scx/Loxl1/Crtap/Anxa2/Col27a1/Ext1/Zfp469/Col18a1/Tnxb/Efemp2/Adamts7/Adamts2/Tgfb2/Mia3/Loxl3/Nf1	31
GO:0046474	glycerophospholipid biosynthetic process	0.0123808	0.363095	1.55696e-09	1.30143e-08	Pik3r1/Chka/Pigg/Fabp5/Itpkb/Ttc7/Pi4k2a/Efr3b/Socs3/Socs5/Pgap1/Cish/Pla2g5/Ptdss1/Fgf2/Plcg2/Tmem150a/Far1/Pigq/Selenoi/Uvrag/Agpat1/Dpm1/Pigs/Pgap2/Pcyt2/Crls1/Pik3c2b/Pyurf/Etnk1/Smg1/Plscr1/Pigu/Gpam/Ip6k1/Inppl1/Pigk/Socs2/Lpcat1/Pigw/Pgap3/Ajuba/Pigc/Ip6k2/Pla2g4a/Bpnt1/Ip6k3/Pigo/Pisd/Itpkc/Cdipt/Gpat4/Atg14/Chpt1/Slc27a1/Bpnt2/Cept1/Impa1/Pigv/Pik3r3/Pip4k2b	61
GO:2000377	regulation of reactive oxygen species metabolic process	0.0123808	0.363095	1.55696e-09	1.30143e-08	Cdkn1a/Lcn2/Cyp1b1/Nnt/Xdh/Rab27a/Bnip3/Akr1c14/Prcp/Lrrk2/Foxo3/Mmp3/Hspd1/Dcxr/Alox5/Pon3/Abcb7/Nqo2/Cflar/Sod1/Plcg2/Tigar/Trp53/Cbr1/Clcn3/Tgfbr2/Ogt/Thbs1/Prkcd/Plau/Insr/Bcl2/Tgfb1/Ptk2b/Akt1/Tyrobp/Sphk2/Dhfr/Eif6/Aldh2/Atg5/Sirt2/Prkn/Sirt1/Ripk3/Agt/Grb2/Fyn/Ncf2/Arf4/Pink1/Parl/Mapk14/Aatf/Pid1/Rhoa/Plin5/Egfr/Mapt/Sod2/Gadd45a	61
GO:0019693	ribose phosphate metabolic process	0.022326	0.294906	1.6382e-09	1.36566e-08	Bcl2l1/Myh7/Xdh/Dcakd/Ak4/Pde4a/Adcy7/Ces1d/Lrrk2/Hmgcs2/Acaca/Adcy1/Uprt/Nudt4/Nt5c1a/Acsl5/Slc25a13/Flcn/Mmut/Nppb/Prps2/Cfh/Nt5e/Nudt5/Far1/Atp6v1a/Dpyd/Ak3/Myc/Pank1/Entpd5/Adcy6/Entpd1/Gda/Atpsckmt/Parp1/Cad/Hmgcs1/Pde5a/Prpsap1/Hsd17b4/Pfas/Adcy4/Tgfb1/Nt5c3/Rora/Nppa/Gpam/Map2k1/Pdk2/Dhodh/Sphk2/Acot11/Slc25a12/Dgat2/Ndufa2/Opa1/Cox11/Ndufa7/Prkn/Acot1/Ola1/Rhoq/Papss1/Ndufv1/Entpd4b/Adcy3…	110
GO:0045598	regulation of fat cell differentiation	0.0113659	0.375839	1.66265e-09	1.38234e-08	Rorc/Gata2/Tlcd3b/Trpv4/Zbtb16/Fbn1/Wnt5a/Bmal1/Alox5/Tgfb1i1/Flcn/Tmem64/Gps2/Creb1/Nr1d1/Zfp36/Medag/Lpl/Sfrp1/Napepld/Ankrd26/Tgfb1/Dusp10/Gnb3/Fndc5/Rora/Trib2/Asxl1/Akt1/Atat1/Yap1/Prdm16/Stk3/Snai2/Metrnl/Sirt2/Sirt1/Dact1/Zbtb7b/Igf1/Carm1/Tfe3/Zfp36l2/Noct/Xbp1/Mapk14/Smad3/Pim1/Ddit3/Ptgr3/Wdfy2/Zfpm2/Sod2/Tcf7l2/Crebl2/Runx1t1	56
GO:0009267	cellular response to starvation	0.0131926	0.353261	1.69184e-09	1.40286e-08	Cdkn1a/Sesn1/Glul/Chka/Alb/Sesn3/Plin3/Lrrk2/Gabarapl1/Tnrc6a/Map1lc3b/Dsc2/Rnf152/Fas/Comt/Dap/Flcn/Gpr155/Atf4/Trp53/Castor1/Wdr45/Ehmt2/Bmf/Pik3c2b/Rragc/Suv39h1/Tsc1/Bcl2/Wdr59/Map1lc3a/Gabarapl2/Mios/Ywhaz/Klf10/Ulk1/Atg5/Rnf167/Kptn/Sirt1/Prkaa2/Clec16a/Mtmr3/Impact/Gcn1/Slc2a1/Gabarap/Xbp1/Atg14/Srebf1/Wrn/Mapk8/Gas2l1/Gas6/Jun/Wdr45b/Prkaa1/Jmy/Itfg2/Ralb/Ripor1/Depdc5/Tcf7l2/Higd1a/Usp33	65
GO:0051054	positive regulation of DNA metabolic process	0.0198904	0.305296	1.71795e-09	1.42072e-08	Tfrc/Cyp1b1/Smoc2/Igfbp3/Actb/Ptprc/Actr8/Morf4l1/Tnfaip1/Ube2n/Shld1/Hnrnpa2b1/Rgcc/Fgf2/Ercc1/Tigar/Ino80c/Cacybp/Myc/Nfrkb/Prkcd/Mms19/Dhx36/Uchl5/Smarcb1/Bcl7c/Mecp2/Camk2d/Parp1/Clcf1/Gnl3/Atm/Brpf3/Tgfb1/Ptk2b/Xrcc1/Smarca5/Bcl7b/Nsd2/Igf1r/Mcrs1/Akt1/Arrb2/Cdc42/Hdgfl2/Timeless/Nabp2/Ruvbl2/Dkc1/Epc2/Smchd1/Cebpg/Ppp1r10/Tnks2/Sirt1/Nek7/Nvl/Usp9x/Mad2l2/Ube2v2/Cd28/Parn/Trp53bp1/Pbrm1/Ppa…	98
GO:0072331	signal transduction by p53 class mediator	0.0115689	0.372549	1.75256e-09	1.4455e-08	Cdkn1a/Cd74/Perp/Ankrd1/Steap3/Hic1/Foxo3/Eda2r/Ddit4/Ubb/Hipk1/Spred2/Cdk5rap3/Pla2r1/Acer2/Mlf1/Trp53/Nop53/Eef1e1/Myc/Tfap4/Casp6/Bok/Atm/Pcbp4/Zmpste24/Spred1/Phlda3/Pdk2/Rrs1/Dyrk1a/Mdm2/Snai2/Bag6/Prkn/Sirt1/Psmd10/Rpl37/Stk11/Bmyc/Kmt5a/Rpl37rt/Snw1/Pttg1ip/Trp53bp2/Bcl3/Myo6/Zfp385b/Jmy/Brca2/Triap1/Rps20/Casp2/Trim24/Rps27l/Armc10/Msx1	57
GO:0014910	regulation of smooth muscle cell migration	0.00893038	0.419048	1.79649e-09	1.47781e-08	Postn/Cyp1b1/Igfbp3/Tmsb4x/Ddr2/S100a11/Egr1/Myh9/Igfbp5/Bmpr1a/Sema6d/Cav1/Ace/Myc/Plau/Plxna1/Rapgef4/Smo/Lpar1/Camk2d/Bcl2/Trib1/S1pr2/Slit2/Fgf9/Mef2c/Rapgef3/Mdm2/Ptk2/Vtn/Dock7/Ndrg4/Agt/Dock4/Igf1/Ppargc1a/Abhd2/Dock5/P2ry6/Iqgap1/Pdgfd/Rhoa/Gstp2/Nf1	44
GO:0043467	regulation of generation of precursor metabolites and energy	0.0119748	0.36646	1.90972e-09	1.56682e-08	Ak4/Etfbkmt/Bnip3/Aldob/Hsd11b1/Trpv4/Gpd1/Taco1/Inpp5k/Sco1/Gfpt1/Ddit4/Grb10/Cavin3/Alox5/Ppif/Flcn/C1qtnf2/Tigar/Khk/Trp53/Nop53/Iscu/Sorbs1/Myc/Ogt/Pnpt1/Irs2/Insr/Jmjd8/Esrrb/Ifnlr1/Akt1/Zbtb20/Ppp1r3d/Prdm16/Ppp1r3b/Sphk2/Eif6/Oas1b/Mlst8/Slc25a12/Prelid1/Prkaa2/Git1/Igf1/Ppargc1a/Pink1/Prxl2c/Ppp1ca/Prkaa1/Arl2/Prkaca/Tmem135/Rhoa/Cbfa2t3/Slc25a23/Ppp2ca/Slc4a4	59
GO:0030177	positive regulation of Wnt signaling pathway	0.01096	0.380282	1.97213e-09	1.60953e-08	Col1a1/Wnk1/Dab2/Lgr6/Lrrk2/Pbxip1/Wnt5a/Bmal1/Csnk1e/Ppp2r3a/Sulf1/Fgfr3/Tmem132a/Xiap/Ttc21b/Cav1/Fgf2/Dixdc1/Wnk2/Crbn/Sfrp1/Usp34/Wls/Fam53b/Tgfb1/Zranb1/Yap1/Zeb2/Fgf9/Sema5a/Bambi/Tnks2/Dact1/Macf1/Rnf220/Tlr2/Rnf146/Tnfaip3/Spin1/Tnks/Caprin2/Eda/Smad3/Lrrk1/Hhex/Reck/Atp6v0c/Sulf2/Gskip/Thra/Adgra2/Egfr/Frat1/Amer1	54
GO:0098781	ncRNA transcription	0.01096	0.380282	1.97213e-09	1.60953e-08	Apln/Gata2/Ets1/Atoh8/Egr1/Ell/Nr3c1/Foxo3/Bmp4/Bmpr1a/Gata6/Wdr82/Trp53/Nop53/Nfatc2/Larp7/Myc/Hdac2/Smarcb1/Rest/Mrtfb/Gnl3/Tgfb1/Polr1e/Gtf3c1/Zfp143/Top1/Polr3d/Zc3h8/Tgfb2/Zc3h4/Npm3/Ddx17/Ice2/Snapc1/Cavin1/Sirt7/Bmyc/Mrtfa/Nfatc4/Ubtf/Spin1/Srebf1/Smad3/Tead1/Jun/Snapc3/Egfr/Rara/Smad1/Ar/Polr1a/Polr3e/Snapc4	54
GO:0030178	negative regulation of Wnt signaling pathway	0.0123808	0.360947	2.03362e-09	1.65536e-08	Limd1/Lmbr1l/Egr1/Dab2/Wnt5a/Hic1/Foxo3/Sox17/Csnk1e/Ppp2r3a/Grb10/Ift80/Lzts2/Trabd2b/Cav1/Tmem64/Apoe/Dact3/Wnt11/Tle2/Hdac2/Invs/Lzic/Sfrp1/G3bp1/Apc2/Nppa/Nlk/Fgf9/Ptpru/Ruvbl2/Stk3/Snai2/Alpk2/Vgll4/Prkn/Rapgef1/Dact1/Mad2l2/Bicc1/Sdhaf2/Stk11/Nfatc4/Mapk14/Ubac2/Lrp4/Cdh2/Apcdd1/Cxxc4/Ccdc88c/Ddit3/Nphp3/Tmem88/Nxn/Tcf7l2/Rbms3/Amer1/Emd/Dab2ip/Rnf213/Hdac1	61
GO:0048639	positive regulation of developmental growth	0.0150193	0.334842	2.06027e-09	1.67268e-08	Adrb1/Tnfrsf12a/Ccnd2/Nrp1/Mkks/Fn1/Twf2/Cxcl12/Ybx3/Wnt5a/Nr3c1/Afdn/Ngf/Bdnf/Bmpr1a/Gata6/Tbx5/Map1b/Fgf2/Picalm/Apoe/Creb1/Ghr/Chd7/Ntn1/Csf1/Smo/Trpv2/Insr/Mecp2/Zfyve27/Akap6/Bcl2/Igf1r/Dll1/Slc25a4/Akt1/Gpam/Yap1/Fgf9/L1cam/Mef2c/Trip10/Dbn1/Smad7/Sema7a/Atp8a2/Sema5a/Hlx/Prkn/Sirt1/Naca/Limk1/Agt/Macf1/Igf1/Cyfip1/Eif2b2/Unc13a/Acacb/Mapk14/Stat5a/Pim1/Tbx2/Arhgap32/Eif4g2/Shtn1/Mul1/Mapt/…	74
GO:0008016	regulation of heart contraction	0.0138015	0.345178	2.19728e-09	1.77926e-08	Myh7/Ccn2/Pik3r1/Apln/Adrb1/Tmem65/Snta1/Tmem38b/Gja1/Rgs4/Scn4b/Pde4b/Cacnb2/Bin1/Gja5/Cxadr/Dsc2/Prkca/Tbx5/Cav1/Smtn/Kcnh2/Tnni3k/Ank2/Kcnd2/Tnnt2/Gpd1l/Abcc9/Pde5a/Hcn4/Thrb/Csrp3/Akap6/Zmpste24/Casq2/Nppa/Irx3/Flna/Bves/Tgfb2/Smad7/Ednrb/Mdm2/Kcnj2/Hrc/Strit1/Sp4/Atp1a1/Cav3/Rnf207/Sirt1/Kcnd3/Gjc1/Agt/Ctnna3/Kcnj8/Ace2/Slc8a1/Adm/Epas1/Slc4a3/Srebf1/Rnls/Dmd/Stc1/Thra/Pkp2/Sema3a	68
GO:0070972	protein localization to endoplasmic reticulum	0.00730668	0.461538	2.27768e-09	1.83958e-08	Ppp1r15a/Herpud1/Ddrgk1/Gja1/Lrrk2/Kdelr3/Srp68/Os9/Get4/Get1/Kdelr2/Ank2/Grik5/Man1a/Spcs3/Srp54c/Sec63/Gabarapl2/Akt1/Sgta/Gbf1/Get3/Chmp4b/Bag6/Naca/Sec61a2/Fkrp/Macf1/Sec62/Srp9/Ubac2/Mia3/Sec61b/Insig2/Btf3/Sec16a	36
GO:0090257	regulation of muscle system process	0.0170489	0.319392	2.33207e-09	1.87863e-08	Pi16/Myh7/Ccn2/Ptgs1/Adrb1/Trim63/Selenon/Errfi1/Tmem38b/Sphk1/Trpv4/Rgs4/Flt1/Nr3c1/Pde4b/Trpc3/Foxo3/Bin1/Gja5/Dsc2/Igfbp5/Calcrl/Prkca/Cacna1s/Casq1/Cav1/Sod1/Jarid2/Ece1/Smtn/Gtf2ird2/Fbxo32/Ank2/Tnnt2/Camk2d/Lmna/Mtpn/Parp1/Pde5a/Hcn4/Akap6/Casq2/Nppa/Slc25a4/Map2k1/Mef2c/Trip10/Zdhhc21/Cdk9/Dbn1/Smad7/Kbtbd13/Ctdp1/Kcnj2/Srl/Hrc/Strit1/Ptk2/Atp1a1/Cav3/Rnf207/Sirt1/Irag1/Cald1/Scn4a/Agt/Doc…	84
GO:0030516	regulation of axon extension	0.00933631	0.40708	2.39731e-09	1.92619e-08	Sema3c/Tnfrsf12a/Nrp1/Fn1/Twf2/Sema6b/Cxcl12/Wnt5a/Ifrd1/Ngf/Bdnf/Ttl/Sema6d/Map1b/Mgll/Ptprs/Rab21/Apoe/Sema6a/Sema3g/Ntn1/Trpv2/Clasp2/Zfyve27/Sema3b/Slit2/L1cam/Dbn1/Sema7a/Sema5a/Ttc3/Plxna4/Limk1/Macf1/Olfm1/Cyfip1/Eif2b2/Arhgap32/Eif4g2/Shtn1/Sema6c/Sema4a/Sema3a/Mapt/Actr3/Myo5b	46
GO:0070373	negative regulation of ERK1 and ERK2 cascade	0.0077126	0.447059	2.53519e-09	2.03173e-08	Emilin1/Dusp3/Errfi1/Fbln1/Dusp6/Dab2/Ptprc/Epha4/Spred2/Sirpa/Cnksr3/Dusp1/Tbc1d10c/Flcn/Timp3/Cav1/Synj2bp/Csk/Wnk2/Sema6a/Lyn/Ankrd26/Dusp10/Ranbp9/Spred1/E130311K13Rik/Ndrg2/Rapgef1/Igf1/Ace2/Dusp4/Xbp1/Arrb1/Dmd/Eif3a/Gstp2/Dynlt1b/Dab2ip	38
GO:0006650	glycerophospholipid metabolic process	0.0174548	0.316176	2.61839e-09	2.09301e-08	Pik3r1/Chka/Plaat1/Pigg/Fabp5/Itpkb/Ttc7/Inpp5k/Lclat1/Pi4k2a/Efr3b/Socs3/Socs5/Pgap1/Sacm1l/Cish/Pla2g5/Ptdss1/Fgf2/Plcg2/Tmem150a/Plcd1/Fig4/Far1/Pitpnc1/Pigq/Selenoi/Uvrag/Agpat1/Dpm1/Pigs/Pgap2/Pcyt2/Crls1/Pik3c2b/Pyurf/Etnk1/Mecp2/Smg1/Plscr1/Napepld/Pla2g7/Pigu/Enpp2/Gpam/Ocrl/Ip6k1/Inppl1/Pigk/Socs2/Lpcat1/Plcb3/Pigw/Pnpla7/Pgap3/Ajuba/Pigc/Ip6k2/Inpp5j/Pla2g4a/Serac1/Bpnt1/Mtmr3/Ip6k3/Pig…	86
GO:0001570	vasculogenesis	0.00852446	0.424242	2.66253e-09	2.12284e-08	Cd34/Xdh/Kdr/Nrp1/Zfp950/Sox17/Amot/Ramp2/Cited2/Cav1/Myo1e/Tgfbr2/Smo/Fbxw7/Tgfb1/Glmn/Heg1/Sox18/Asb4/Sgpl1/Tek/Spred1/Yap1/Fgf9/Angpt1/Wars2/Ptk2/Gjc1/Pbrm1/Adm/Epor/Brpf1/Fzd4/Hhex/Rras/Tie1/Ackr3/Rasip1/Zfpm2/Tgfbr3/Tmem100/Tbx20	42
GO:0006606	protein import into nucleus	0.0129896	0.351648	2.77279e-09	2.19207e-08	Cdkn1a/Apod/Pik3r1/Sqstm1/Lrrk2/Pkia/Bmal1/Abra/Bmp4/Kpna2/Ipo7/Nfkbia/Nup35/Cry2/Bag3/Appl1/Trp53/Hikeshi/Zpr1/Cabp1/Ranbp6/Prkcd/Cfl1/Tnpo3/Smo/Lmna/Kpna3/Ipo4/Fam53b/Tgfb1/Ing1/Epm2a/Ipo8/Tek/Akt1/Flna/Fgf9/Pola2/Agap3/Stk3/Adar/Angpt1/Uaca/Ipo5/Appl2/Agt/Il33/Cse1l/Heatr3/Xbp1/Mapk14/Kpna4/Rab23/Txnip/Dmap1/Kpna6/Pttg1ip/Bcl3/Eif4enif1/Mdfic/Tardbp/Kpna1/Med1/Nf1	64
GO:0015931	nucleobase-containing compound transport	0.0140045	0.341584	2.77485e-09	2.19207e-08	Wnk1/Ncbp2/Peg10/Gja1/Xpo1/Akap8l/Kif5c/Slc28a2/Lrrc8a/Ndc1/Nup35/Hnrnpa2b1/Slc17a9/Tgfbr2/Zfp36/Pnpt1/Lrrc8c/Parp11/Lrpprc/Slc35b4/Nxt2/Abcc5/Slc35a3/Tsc1/Nsun2/Rftn1/Phax/Tomm20/Slc25a4/Slc35a1/Sidt2/Khdrbs1/Cpeb1/Xpo5/Srsf7/Slc29a3/Ank/Bicd2/Mrpl18/Gle1/Rftn2/Slc29a1/Slc35b1/Mcm3ap/Nrde2/Zc3h11a/Tnks/Igf2bp2/Slc25a24/Slc33a1/Cd47/Srsf1/Hhex/Slbp/Zc3h3/Dhx9/Cetn2/Slc25a32/Ythdc1/Nup210/Slc25a42…	69
GO:0071902	positive regulation of protein serine/threonine kinase activity	0.0140045	0.341584	2.77485e-09	2.19207e-08	Ccnd1/Fgd4/Ccnd2/Adam17/Tcim/Ptprc/Lrrk2/Marcks/Wnt5a/Flt1/Dipk2a/Epha4/Irgm1/Rgcc/Fgf2/Magi3/Map2k6/Csk/Ghr/Taok3/Thbs1/Prkcd/Insr/Pde5a/Akap6/Fgf18/Tgfb1/Ptk2b/Fgd2/Etaa1/Map4k2/Akt1/Traf6/Map2k1/Zeb2/Cdk5rap1/Mef2c/Dazap2/Sirt1/Ajuba/Ip6k2/Agt/Psmd10/Tab1/Igf1/Erbb2/Camk1/Cd24a/Pim1/Telo2/Tead1/Tirap/Ntf3/Kras/Fzd4/Irak1/Map3k4/Iqgap1/Adam9/Pdgfd/Ralb/Rhoa/Egfr/Ppp2ca/C1qtnf9/Pkd2/Traf2/Higd1a…	69
GO:0051607	defense response to virus	0.0200934	0.301829	2.77756e-09	2.19207e-08	Bcl2l1/Ifit1/Irf7/Plscr2/Ifngr2/Bnip3/Apobec3/Fv1/Ddx60/Ifit3/Serinc3/Ifit3b/Ptprc/Mx2/Tspan6/Htra1/Cxadr/Ddit4/Stat2/Vamp8/Irgm1/Riok3/Ube2n/Trim7/Ifitm1/Ptprs/Ndufaf4/Unc93b1/Usp20/Mlkl/Nck1/Dhx36/Nploc4/Garin5a/Ifit1bl2/Exosc5/Ddx56/Abcc9/Chuk/Plscr1/G3bp1/Bcl2/Il15/Tlr3/Nt5c3/Trim65/Zmpste24/Ifnlr1/Traf6/Gpam/Ddx1/Traf3/Abcf3/Trim13/Rtp4/Polr3d/Oas1b/Ifit2/Ddx17/Atg5/Stat1/Sirt2/Polr3b/Sting1…	99
GO:0007369	gastrulation	0.0131926	0.349462	2.79272e-09	2.19845e-08	Apln/Col5a1/Myadm/Wnk1/Col5a2/Scx/Twsg1/Atoh8/Clasp1/Ldb1/Fn1/Wnt5a/Myh9/Sox17/Bmp4/Amot/Bmpr1a/Syf2/Dusp1/Gata6/Ext1/Trp53/Wnt11/Tgfbr2/Plpp3/Exoc4/Sox7/Sfrp1/Clasp2/Leo1/Wls/Itgav/Itga5/Nckap1/Ets2/Ric8a/Map2k1/Vtn/Kif16b/Rtf1/Dact1/Tnrc6c/Phldb2/Macf1/Grb2/Ugdh/Ctr9/Acvr2a/Dusp4/Tnfaip3/Arfrp1/Zfp568/Smad3/Gpi1/Paf1/Poglut1/Tasor/Acvr1/Hhex/Prkaca/Dld/Nphp3/Epb41l5/Ext2/Smad1	65
GO:0010038	response to metal ion	0.0196874	0.303125	3.12868e-09	2.4567e-08	Mt1/Tuba1a/Tfrc/Loxl2/Syt12/Xdh/Plscr2/Bnip3/Wnk1/Akr1c14/Aldob/Adcy7/Lgmn/Itpkb/Hmox1/Fn1/Lrrk2/Trpc3/Fas/Bmp6/Gatm/Slc25a13/Ppif/Ass1/Slc40a1/Cav1/Sod1/Kcnb1/Plcg2/Tigar/Khk/Plcd1/Creb1/Nfatc2/Kcnip3/Gss/Aqp1/Thbs1/Casp6/Tnnt2/Cp/Mecp2/Sod3/Chuk/Plscr1/Bcl2/Tcirg1/Dlg4/Fabp4/Cdk4/Akt1/Alg2/Daxx/Ggh/Mef2c/Slc25a12/Itpr3/Prkaa2/Nek7/Pdcd6/Pla2g4a/Slc12a2/Asph/Cpne2/Itpkc/Mapk9/Nfatc4/Dmtn/Pam/P2r…	97
GO:0055007	cardiac muscle cell differentiation	0.0117719	0.36478	3.18107e-09	2.49155e-08	Pi16/Col14a1/Adrb1/Ccnd2/Xirp1/Rgs4/Nr3c1/Cxadr/Bmp4/Bmpr1a/Actc1/Gata6/Tbx5/Cacybp/Efnb2/Sox6/Hdac2/Sgcd/Nrap/Ift20/Camk2d/Lmna/Tsc1/Csrp3/Akap6/Tgfb1/Lrrc10/Lrrc27/Zmpste24/Dll1/Slc25a4/Irx3/Arrb2/Rarb/Bves/Mef2c/Trip10/Ctdp1/Atg5/Large1/Alpk2/Cav3/Myh10/Sirt1/Nebl/Fhl2/Agt/Kcnj8/Igf1/Sgcb/Naglu/Slc8a1/Sorbs2/Acvr1/Actn2/Itgb1/Rara/Neb	58
GO:0060562	epithelial tube morphogenesis	0.0231378	0.288608	3.29581e-09	2.57493e-08	Lcn2/Kdr/Ift122/Ret/Nrp1/Plxnd1/Gja1/Cxcl12/Wnt5a/Dchs1/Flt1/Nr3c1/Mthfr/Col4a1/Cc2d2a/Sox17/Aldh1a2/Bmp4/Epha4/Irx1/Casp8/Lzts2/Cited2/Ext1/Fgf2/Dll4/Vasp/Tcf21/Efnb2/Tgfbr2/Mmp14/Myc/Casp3/Ntn1/Csf1/Cfl1/C2cd3/Smo/Tmtc3/Sfrp1/Tsc1/Fzd2/Bcl2/Rgma/Tgfb1/Med12/Glmn/Dll1/Nckap1/Irx3/Tek/Traf6/Yap1/Slit2/Zeb2/Irx2/Timeless/Stard13/Epha7/Mef2c/Stk3/Tgfb2/Sema5a/Angpt1/Opa1/Mgp/Cav3/Lama5/Rnf207/Agt/S…	114
GO:0140546	defense response to symbiont	0.0200934	0.300912	3.31378e-09	2.58248e-08	Bcl2l1/Ifit1/Irf7/Plscr2/Ifngr2/Bnip3/Apobec3/Fv1/Ddx60/Ifit3/Serinc3/Ifit3b/Ptprc/Mx2/Tspan6/Htra1/Cxadr/Ddit4/Stat2/Vamp8/Irgm1/Riok3/Ube2n/Trim7/Ifitm1/Ptprs/Ndufaf4/Unc93b1/Usp20/Mlkl/Nck1/Dhx36/Nploc4/Garin5a/Ifit1bl2/Exosc5/Ddx56/Abcc9/Chuk/Plscr1/G3bp1/Bcl2/Il15/Tlr3/Nt5c3/Trim65/Zmpste24/Ifnlr1/Traf6/Gpam/Ddx1/Traf3/Abcf3/Trim13/Rtp4/Polr3d/Oas1b/Ifit2/Ddx17/Atg5/Stat1/Sirt2/Polr3b/Sting1…	99
GO:1901987	regulation of cell cycle phase transition	0.0255734	0.280624	3.35318e-09	2.60337e-08	Cdkn1a/Fam107a/Cirbp/Cenpf/Ccnd1/Fbxo31/Ints7/Actb/Ddr2/Ccnd2/Adam17/Nacc2/Hacd1/Tcim/Stxbp4/Nek1/Ptpn11/Gas1/Miip/Prmt2/Ctdsp2/Pkia/Dync1li1/Hecw2/Syf2/Cdk5rap3/Apbb2/Rgcc/Appl1/Ccng1/Plcg2/Hus1/Fhl1/Mlf1/Trp53/Nop53/Csf1r/Prpf19/Gpnmb/Cenpj/Larp7/Xpc/Tfap4/Cul4b/Taok3/Fbxo7/Smarcb1/Bcl7c/Mecp2/Camk2d/Eme2/Nsun2/Bcl2/Atm/Xrcc3/Tgfb1/Creb3l1/Cdc23/Bcl7b/Rpa2/Cdk4/Etaa1/Tmod3/Ccnh/Akt1/Rbbp8/Crlf3…	126
GO:0000045	autophagosome assembly	0.00933631	0.403509	3.35733e-09	2.60337e-08	Trp53inp1/Atg101/Tom1/Atg13/Lrrk2/Gabarapl1/Map1lc3b/Irgm1/Ulk2/Rab7/Pacs2/Bag3/Trp53inp2/Tmem41b/Wdr45/Ehmt2/Synpo2/Atg4c/Ift20/Tcirg1/Map1lc3a/Gabarapl2/Epm2a/Lrba/Traf6/C9orf72/Fez2/Ulk1/Atg5/Sting1/Mtmr3/Gabarap/Pink1/Snx18/Lrsam1/Atg14/Rab23/Rab33b/Atg10/Wdr45b/Ubqln2/Sec22b/Ralb/Rufy4/Ctsd/Pip4k2b	46
GO:0031929	TOR signaling	0.0129896	0.349727	3.55894e-09	2.75284e-08	Sesn1/Eif4ebp1/Kdr/Sik3/Sesn3/Armh4/Fnip2/Bmal1/Rnf152/Gpr137c/Ddit4/Ube2n/Flcn/Gpr155/Castor1/Ubr2/Mfsd8/Gpat3/Reln/Rragc/Tsc1/Atm/Wdr59/Epm2a/Zmpste24/Mios/Akt1/Nlk/C9orf72/Mlst8/Ywhaz/Ube2d1/Rnf167/Tbck/Spaar/Kptn/Mapkap1/Sirt1/Prkaa2/Pdcd6/Clec16a/Sh3bp4/Usp9x/Eif4ebp2/Stk11/Rps6ka1/Akt3/Xbp1/Pim1/Telo2/Gas6/Prr5/Rps6kb2/Prkaa1/Klhl22/Tiprl/Prkaca/Akt1s1/Itfg2/Tbk1/Nckap1l/Ccdc88a/Ube2w/Depdc5	64
GO:0042770	signal transduction in response to DNA damage	0.0131926	0.347594	3.57267e-09	2.75661e-08	Cdkn1a/Cd74/Ccnd1/Fbxo31/Ints7/Ankrd1/Nek1/Ptpn11/Hic1/Foxo3/Spred2/Syf2/Cdk5rap3/Pla2r1/Ccng1/Acer2/Hus1/Trp53/Nop53/Prpf19/Eef1e1/Xpc/Tfap4/Taok3/Eme2/Atm/Pcbp4/Creb3l1/Rpa2/Etaa1/Zmpste24/Spred1/Dyrk1a/Atrip/Cdc5l/Mdm2/Snai2/Ppp1r10/Sirt1/Mad2l2/Grb2/Psmd10/Trp53bp1/Rfwd3/Taok1/Kmt5a/Brcc3/Mapk14/Rnaseh2b/Map3k20/Pttg1ip/Bcl3/Myo6/Mre11a/Cry1/Babam2/Tiprl/Brd4/Brca2/Triap1/Foxn3/Casp2/Rps27l/U…	65
GO:1903311	regulation of mRNA metabolic process	0.0188756	0.305921	3.93674e-09	3.03e-08	Tent5b/Cirbp/Rbm3/Csdc2/Tent5a/Vim/Mettl16/Tnrc6a/Caprin1/Adarb1/Brf1/Hnrnpa2b1/Tob1/Dcp2/Prpf19/Zfp36/Larp7/Pan2/Rida/Pnpt1/Dhx36/Tra2a/Sf1/Papola/Rbfox1/Exosc5/Nsrp1/Rest/Leo1/Pcbp4/Ybx2/Hnrnpc/Srsf9/Safb/Cdk9/Dyrk1a/Khdrbs1/Mettl3/Srrm4/Fxr2/Srsf6/Srsf7/Ddx17/Dazap1/Obi1/Fastkd1/Srpk1/Larp4b/Hnrnpl/Tnrc6c/Hnrnpr/Tia1/Safb2/Fastkd2/Parn/Srrm1/Rbmxl1/Pabpc4/Zfp36l2/Plekhn1/Noct/Nrde2/Igf2bp2/Rbm…	93
GO:1904375	regulation of protein localization to cell periphery	0.0115689	0.365385	4.03506e-09	3.098e-08	Bcl2l1/Pik3r1/Actb/Wnk1/Sqstm1/Ppfia1/Dab2/Kalrn/Tmbim1/Vamp8/Adam10/Gpc6/Kcnj11/Appl1/Cnpy4/Picalm/Lrrc15/Csk/Tamalin/Mmp14/Sorbs1/Ogt/Rapgef4/Camk2d/Tnik/Numb/Csrp3/Tgfb1/Epb41l2/Epm2a/Akt1/Lgals3/Map2k1/Ldlrap1/Epb41/Rhoq/Csnk2a1/Pias1/Cltc/Gpc4/Camk2a/Prnp/Itgb1/Stx8/Lztfl1/Pid1/Arhgap44/Ppp2r5a/Wnk4/Commd1/Ptpn9/Numa1/Egfr/Actr3/Myo5b/Ar/Camk2b	57
GO:0051896	regulation of phosphatidylinositol 3-kinase/protein kinase B signal transduction	0.0170489	0.315789	4.24919e-09	3.25437e-08	Sesn1/Xdh/Ddr2/Unc5b/Rcn3/Akr1c14/Kdr/Ret/Sesn3/Fn1/Cxcl12/Inpp5k/Sco1/Flt1/Dipk2a/Mmp3/Igfbp5/Cavin3/Flcn/Plxnb1/Rasd2/Fgf2/Osbpl8/Vav3/Nop53/Csf1r/Hdac2/Thbs1/Pik3ip1/Irs2/Reln/Insr/Clcf1/Pde3b/Tgfb1/Ppp1r16b/Igf1r/Tek/Arrb2/Cdc42/Gcnt2/Phlda3/Rubcn/Stk3/Tgfb2/Myorg/Sema5a/Angpt1/Rapgef3/Ptk2/Ror1/Cav3/Itsn1/Sirt1/Rapgef1/Arfgef1/Pdcd6/Obscn/Agt/Cx3cl1/Ptpn6/Igf1/Cd28/Stk11/C1qtnf1/Extl3/Itgb1/…	84
GO:0010001	glial cell differentiation	0.0182667	0.308219	4.63909e-09	3.54425e-08	Tuba1a/Tspan2/Vcan/Clu/Vim/Klf15/Gpm6b/Ptpn11/Nr3c1/Afdn/Bin1/Bmp4/Sh3tc2/Aspa/Pmp22/Epha4/Adora2a/Adam22/Fgfr3/Ttc21b/Sod1/Fgf2/Tppp/Nrros/Csf1r/Prpf19/Mbd1/Nr1d1/Sox6/Hdac2/Plpp3/Cul4b/Eif2b3/Reln/Smo/Exoc4/Mecp2/Clcf1/Ndrg1/Slc45a3/Tgfb1/Dusp10/Med12/Dll1/Eif2b5/Tnfrsf21/Mios/Akt1/Enpp2/Map2k1/Zeb2/Plp1/B4galt6/Ptpra/Mettl3/Large1/Ror1/Sirt2/Vtn/Agt/Fkrp/Grb2/Atf5/Igf1/Erbb2/Naglu/Eif2b2/Il33/…	90
GO:0000723	telomere maintenance	0.01096	0.372414	4.70275e-09	3.57636e-08	Actr8/Shld1/Hnrnpa2b1/Ercc1/LTO1/Hus1/Ino80c/Dcp2/Myc/Nfrkb/Dhx36/Uchl5/Zfp827/Lmna/Parp1/Smg1/Gnl3/Dclre1b/Atm/Xrcc3/Xrcc1/Rpa2/Mcrs1/Ten1/Hnrnpc/Nabp2/Ruvbl2/Dkc1/Nat10/Ppp1r10/Tnks2/Nek7/Mad2l2/Xrcc6/Parn/Bmyc/Actr5/Rif1/Stn1/Terf2ip/Tnks/Wrn/Telo2/Gnl3l/Terf2/Nhp2/Mre11a/Cct6a/Map3k4/Tfpt/Brca2/Hdac8/Ccne2/Pot1a	54
GO:0030032	lamellipodium assembly	0.00690075	0.465753	4.70411e-09	3.57636e-08	Fscn1/Pik3r1/Fgd4/Whamm/Twf2/Pmp22/Plxnb3/Carmil1/Ablim2/Vav3/Nck1/Aqp1/Cfl1/Abi2/Plce1/Wasf2/Nckap1/Cdc42/Slit2/Bin3/Nck2/Ajuba/Spata13/Capzb/Cyfip1/Auts2/Dmtn/Pxn/Actr2/Itgb1/Ablim1/Vcl/Ccdc88a/Actr3	34
GO:0000209	protein polyubiquitination	0.01644	0.318898	4.83093e-09	3.66382e-08	Dzip3/Jade2/Rnf144b/Arih2/Rnf166/Nqo1/Dysf/Rnf144a/Rnf152/Ube2n/Ube3c/Znrf1/Gps2/Prpf19/Cul4b/Rnf19b/Rnf126/Ube2g2/Trim3/Rnf31/Bcl2/Tcf25/Dda1/Cdc23/Trim65/Traf6/Fbxl7/Traf3/Cbfb/Mkrn1/Mgrn1/Ube2d1/Rnf167/Tnks2/Prkn/Mkrn2/Ube2j2/Ttc3/Cdc27/Ube2v2/Kbtbd7/Rnf40/Hace1/Wwp2/Dcaf15/Anapc7/Cdc26/Gabarap/Rnf146/Lrsam1/Ube2l3/Tnfaip3/Trim2/Chfr/Tnks/Rnf125/Parp10/Zfp91/Ube2a/Anapc10/Rnf216/Rnf114/Mul1/Zf…	81
GO:0006401	RNA catabolic process	0.0184697	0.306397	5.28644e-09	3.99177e-08	Tent5b/Cirbp/Csdc2/Tent5a/Vim/Ncbp2/Mettl16/Tnrc6a/Caprin1/Nudt12/Nudt16/Brf1/Skic2/Supv3l1/Wdr82/Ago4/Tob1/Zpr1/Dcp2/Trir/Zfp36/Pan2/Skic3/Rida/Pnpt1/Lrpprc/Dhx36/Exosc5/Smg1/Nsun2/Atm/Pcbp4/Phax/Ybx2/Lsm6/Hnrnpc/Dkc1/Sidt2/Mettl3/Zc3h4/Fxr2/Fastkd1/Pym1/Larp4b/Tnrc6c/Hnrnpr/Fastkd2/Parn/Edc4/Pnrc1/Pabpc4/Ago3/Zfp36l2/Plekhn1/Noct/Nrde2/Igf2bp2/Lsm2/Rbm7/Mettl14/Samd4/Rnaseh2b/Edc3/Tirap/Nbas/Ei…	91
GO:0031333	negative regulation of protein-containing complex assembly	0.0115689	0.363057	5.28902e-09	3.99177e-08	Eif4ebp1/Lmod3/Myadm/Tmsb4x/Tmsb10/Clu/Spta1/Mkks/Fkbp4/Twf2/Jam3/Add3/Xaf1/Irgm1/Pfn2/Riok3/Carmil1/Capn1/Tmc8/Lmod2/Nop53/Aida/Prkcd/Eps8/Cfl1/Kank3/Zfp827/Crbn/Mtpn/Capza1/Svip/Tmod3/Cdc42/Stmn2/Slit2/Evl/Dyrk1a/Ulk1/Sirt2/Arfgef1/Hip1r/Tmod4/Dact1/Inpp5j/Pfn4/Capzb/Stxbp1/Stmn1/Tlr2/Dmtn/Pecam1/Sptb/Ankrd27/Thra/Sptan1/Syt11/Cyrib	57
GO:0090199	regulation of release of cytochrome c from mitochondria	0.00548001	0.529412	5.45468e-09	4.10682e-08	Bcl2l1/Bnip3/Fas/Ppif/Mllt11/Trp53/Pdcd5/Bmf/Lmna/Akt1/Arrb2/Bak1/Opa1/Prelid1/Prkn/Psmd10/Igf1/Wdr35/Bcl2l11/Tnfsf10/Pink1/Fam162a/Parl/Dnm1l/Triap1/Gpx1/Higd1a	27
GO:0043433	negative regulation of DNA-binding transcription factor activity	0.0121778	0.35503	5.65612e-09	4.2482e-08	Cyp1b1/Heyl/Hr/Hmox1/Prmt2/Lrrk2/Ralgapa1/Zfp932/Nfkbia/Ndn/Dap/Irak3/Cd200/Cdk5rap3/Nfkbib/Hdac2/Dnaja3/Anxa4/Chuk/Trib1/Igf1r/Trib2/Arrb2/Traf3/Flna/Otulin/Ptgis/Smad7/Rlim/Cebpg/Glis2/Sirt1/Mad2l2/Psmd10/Wwp2/Mturn/Hif1an/Ptch1/Creb3/Pbx1/Tax1bp1/Pias4/Tnfaip3/Pim1/Parp10/Prnp/Arrb1/Erbin/Bcl3/Irak1/Brms1/Ddit3/Commd1/Thra/Commd7/Med13/Pkd2/Tcf7l2/Dab2ip/Peli1	60
GO:0006986	response to unfolded protein	0.00913335	0.401786	5.80274e-09	4.34782e-08	Pik3r1/Ppp1r15a/Hsph1/Ccnd1/Herpud1/Tmtc4/Ddrgk1/Pmp22/Hspd1/Os9/Ermp1/Cdk5rap3/Atf4/Bag3/Edem3/Optn/Erp44/Crebrf/Nck1/Abca7/Thbs1/Pdia6/Tmem33/Bok/Creb3l1/Daxx/Bak1/Rhbdd1/Abcb10/Nck2/Jkamp/Ube2j2/Pigbos1/Dnajb9/Ero1a/Creb3/Thbs4/Xbp1/Manf/Cops5/Erlec1/Selenos/Atf6b/Ddit3/Dab2ip	45
GO:0006935	chemotaxis	0.0259793	0.277056	5.91079e-09	4.41814e-08	Fgf16/Lox/Cd74/Smoc2/Itga9/Itga1/Sema3c/Wnk1/Ninj1/Kdr/Nrp1/Adam17/Lgmn/Dusp3/Rin3/Vcam1/Nrp2/Pf4/Cxcl16/Fn1/Trpv4/Sema6b/Cxcl12/Wnt5a/Flt1/Jam3/Pde4b/Ppm1f/Coro1a/Sbds/Dysf/Cxadr/Plxnb3/Amot/Dpep1/Cmtm3/Alox5/Adam10/Ephb1/Prkca/Ccr2/Dusp1/Sema6d/Fgf2/Slit3/Vav3/Vegfc/St6gal1/Creb1/Calr/Csf1r/Mmp2/Efnb2/Sema6a/Thbs1/Prkcd/Parva/Sema3g/Ntn1/Csf1/Lyn/Lpar1/Lsp1/Lbp/Fgf18/Pla2g7/Sema3b/Tgfb1/Swap70/…	128
GO:0032200	telomere organization	0.011163	0.366667	6.48843e-09	4.83827e-08	Actr8/Shld1/Hnrnpa2b1/Ercc1/LTO1/Hus1/Ino80c/Dcp2/Myc/Ezh1/Nfrkb/Dhx36/Uchl5/Zfp827/Lmna/Parp1/Smg1/Gnl3/Dclre1b/Atm/Xrcc3/Xrcc1/Rpa2/Mcrs1/Ten1/Hnrnpc/Nabp2/Ruvbl2/Dkc1/Nat10/Ppp1r10/Tnks2/Nek7/Mad2l2/Xrcc6/Parn/Bmyc/Actr5/Rif1/Stn1/Terf2ip/Tnks/Wrn/Telo2/Gnl3l/Terf2/Nhp2/Mre11a/Cct6a/Map3k4/Tfpt/Brca2/Hdac8/Ccne2/Pot1a	55
GO:0044403	biological process involved in symbiotic interaction	0.016846	0.314394	6.58648e-09	4.89964e-08	Bcl2l1/Cd74/Gbp6/Slc3a2/Nrp1/Gbp2/Fbln1/Fn1/Inpp5k/Hspd1/Vps16/Vamp8/Vps37b/Rab7/Furin/Cav1/Ifitm1/Tmem41b/Apoe/Csf1r/Lrrc15/Tbc1d20/Uvrag/Tfap4/Lgals1/Jpt2/Cfl1/Smarcb1/Zdhhc9/Insr/Cav2/Hs3st5/Ddx56/Rest/Napepld/Chmp6/Itgav/Cdc42/Psmc3/Stom/Cdk9/Ctdp1/Chmp4b/Prkn/P4hb/Tpcn1/Ctsb/Chmp2a/Nectin2/Ly6e/Sap30bp/Trim25/Ace2/Nectin3/Sap30/Bcl2l11/AU040320/Card9/Snw1/Chmp1b/Kpna6/Gas6/Jun/Ifitm2/Rock2/M…	83
GO:0106106	cold-induced thermogenesis	0.0113659	0.363636	6.71409e-09	4.98265e-08	Lcn2/Lama4/Adrb1/Alpl/Adam17/Fabp5/Il4ra/Ces1d/Gja1/Bmal1/Kdm3a/Gatm/Grb10/Oma1/Ccr2/Flcn/Adipor2/Atf4/Cav1/Cpt2/Pctp/Map2k6/Cidea/Nr1d1/Ogt/Trpv2/Il15/Fabp4/Ybx2/Igf1r/Prlr/Prkab2/Prdm16/Per2/Ip6k1/Acot11/Arrdc3/Appl2/Dock7/Zbtb7b/Stk11/Tfe3/Slc25a44/Ppargc1a/Epas1/Igf2bp2/Scd1/Sfxn5/Nr1h3/Ache/Gnas/Ebf2/Ddit3/Thra/Nova1/Lepr	56
GO:0032272	negative regulation of protein polymerization	0.00750964	0.440476	6.73252e-09	4.98443e-08	Lmod3/Myadm/Tmsb4x/Tmsb10/Spta1/Mkks/Fkbp4/Twf2/Add3/Pfn2/Carmil1/Capn1/Lmod2/Prkcd/Eps8/Cfl1/Kank3/Mtpn/Capza1/Tmod3/Stmn2/Slit2/Evl/Dyrk1a/Arfgef1/Hip1r/Tmod4/Inpp5j/Pfn4/Capzb/Stmn1/Tlr2/Dmtn/Pecam1/Sptb/Sptan1/Cyrib	37
GO:0007098	centrosome cycle	0.0103511	0.377778	7.10345e-09	5.23412e-08	Tuba1a/Chordc1/Xpo1/Dync1li1/Spice1/Odf2/Wdr62/Sdccag8/Crocc/Ccnl2/Xrcc2/Bnip2/Cntln/Uvrag/Cenpj/C2cd3/Cntrob/Xrcc3/Cep131/Plk2/Ssx2ip/Golga2/Azin1/Dctn1/Nat10/Chmp4b/Sirt1/Chmp2a/Ranbp1/Atf5/Haus3/Chd3/Mapk8/Nin/Chmp1b/Pard6b/Mark4/Mdm1/Nubp1/Rock2/Arl2/Cetn2/Cdk5rap2/Brca2/Kif3a/Cep192/Cenatac/Gadd45a/Chmp5/Usp33/Pard6a	51
GO:0043500	muscle adaptation	0.0103511	0.377778	7.10345e-09	5.23412e-08	Pi16/Myh7/Adrb1/Trim63/Selenon/Klf15/Errfi1/Rgs4/Nr3c1/Trpc3/Foxo3/Bmp4/Igfbp5/Gatm/Prkca/Cacna1s/Mir208b/Gata6/Cflar/Nppb/Jarid2/Ece1/Gtf2ird2/Myoz2/Fbxo32/Camk2d/Lmna/Mtpn/Parp1/Pde5a/Akap6/Nppa/Slc25a4/Mef2c/Trip10/Cdk9/Ctdp1/Srl/Ptk2/Cav3/Sirt1/Agt/Igf1/Smad3/Tead1/Rock2/Ndufs4/Gtf2ird1/Mlip/Smad1/Ar	51
GO:0050679	positive regulation of epithelial cell proliferation	0.0154252	0.323404	7.17064e-09	5.26278e-08	Glul/Apln/Ccnd1/Gata2/Kdr/Ccnd2/Adam17/Stxbp4/Gas1/Lrg1/Hmox1/Ptprn/Cxcl12/Wnt5a/Dysf/Htra1/Cxadr/Bmp4/Plxnb3/Bmp6/Fgfr3/Bmpr1a/Prkca/Cav1/Cflar/Fgf2/Col18a1/Hspg2/Vegfc/Aggf1/Myc/Agap2/Irs2/Smo/Cav2/Sfrp1/Fgf18/Tgfb1/Ppp1r16b/Cdk4/Akt1/Cdc42/Yap1/Azin1/Fgf9/Foxp2/Itgb3bp/Sema5a/Srsf6/Hlx/Sirt1/Pdcd6/Igf1/Erbb2/Bmyc/Thbs4/Tnfaip3/Akt3/Xbp1/B4galt1/Pdcl3/Stat5a/Emc10/Itpr1/Jun/Nras/Mydgf/Kif3a/Egf…	76
GO:0036503	ERAD pathway	0.00893038	0.40367	7.19312e-09	5.26278e-08	Rcn3/Herpud1/Erlin2/Os9/Fbxo44/Get4/Uggt2/Cav1/Edem3/Erlin1/Nrros/Calr/Nploc4/Man1a/Ube2g2/Aup1/Svip/Dnajb12/Man1b1/Sgta/Trim13/Ubxn1/Rhbdd1/Ubxn6/Jkamp/Ubxn10/Bag6/Ube2j2/Trim25/Dnajb9/Ubac2/Sec61b/Usp14/Erlec1/Uggt1/Selenos/Hsp90b1/Tmem259/Man1c1/Ubqln2/Rnf185/Ngly1/Ube2j1/Ufd1	44
GO:0071901	negative regulation of protein serine/threonine kinase activity	0.00893038	0.40367	7.19312e-09	5.26278e-08	Cdkn1a/Chordc1/Inpp5k/Pkia/Spry4/Irak3/Dusp1/Cdk5rap3/Cav1/Apoe/Aida/Casp3/Tfap4/Dnaja1/Fbxo7/Prkcd/Lyn/Fem1a/Sfrp1/Dtnbp1/Dusp10/Heg1/Nppa/Uchl1/Cdk5rap1/Inppl1/Cav3/Sirt1/Agt/Ptpn6/Dusp16/Slc8a1/Tnfaip3/Inca1/Hmgcr/Hhex/Mapk8ip1/Smpd1/Cdk5rap2/Gstp2/Rasip1/Nf1/Gadd45a/Dab2ip	44
GO:0071478	cellular response to radiation	0.0125837	0.348315	7.40279e-09	5.38555e-08	Cdkn1a/Bcl2l1/Pik3r1/Trp53inp1/Ints7/Ccnd2/Egr1/Mme/Mmp3/Ercc1/Hus1/Trp53/Mmp2/Bmf/Xpc/Cul4b/Aqp1/Prkcd/Dhx36/Parp1/Sfrp1/Fbxw7/Atm/Tgfb1/Zmpste24/Swi5/Yap1/Ruvbl2/Bak1/Agap3/Mapk11/Rhbdd1/Lig4/Mettl3/Mdm2/Snai2/Ppid/Gnb5/Sirt1/Tnks1bp1/Xrcc6/Crebbp/Grb2/Stk11/Mapk9/Xpa/Nfatc4/Brcc3/Actr5/Mapk14/Wrn/Elk1/Map3k20/Polk/Rhob/Babam2/H2ac25/Tlk2/Smpd1/Brca2/Triap1/Gadd45a	62
GO:0045766	positive regulation of angiogenesis	0.0127867	0.346154	7.41288e-09	5.38555e-08	Cd34/Cyp1b1/Smoc2/Gata2/Emilin1/Ets1/Wnk1/Ninj1/Kdr/Nrp1/Lrg1/Sphk1/Hmox1/Wnt5a/Flt1/Ramp2/Prkca/Gata6/Emilin2/Fgf2/Vegfc/Aggf1/Tgfbr2/Aqp1/Thbs1/Fgf18/Jmjd8/Ptk2b/Tlr3/Dll1/Itga5/Tek/Lgals3/Jak1/Bmper/Ptgis/Angpt2/Sema5a/Rapgef3/Wars2/Ccbe1/Sirt1/Pdcd6/Adm/Akt3/Xbp1/Pxn/C3ar1/Pdcl3/Erap1/Itgb1/Emc10/Ctsh/Tjp1/Rhob/Nras/Rras/Mydgf/Pkm/Tie1/Smad1/Stim1/Plcg1	63
GO:1904018	positive regulation of vasculature development	0.0127867	0.346154	7.41288e-09	5.38555e-08	Cd34/Cyp1b1/Smoc2/Gata2/Emilin1/Ets1/Wnk1/Ninj1/Kdr/Nrp1/Lrg1/Sphk1/Hmox1/Wnt5a/Flt1/Ramp2/Prkca/Gata6/Emilin2/Fgf2/Vegfc/Aggf1/Tgfbr2/Aqp1/Thbs1/Fgf18/Jmjd8/Ptk2b/Tlr3/Dll1/Itga5/Tek/Lgals3/Jak1/Bmper/Ptgis/Angpt2/Sema5a/Rapgef3/Wars2/Ccbe1/Sirt1/Pdcd6/Adm/Akt3/Xbp1/Pxn/C3ar1/Pdcl3/Erap1/Itgb1/Emc10/Ctsh/Tjp1/Rhob/Nras/Rras/Mydgf/Pkm/Tie1/Smad1/Stim1/Plcg1	63
GO:0042330	taxis	0.0259793	0.275862	7.84459e-09	5.6859e-08	Fgf16/Lox/Cd74/Smoc2/Itga9/Itga1/Sema3c/Wnk1/Ninj1/Kdr/Nrp1/Adam17/Lgmn/Dusp3/Rin3/Vcam1/Nrp2/Pf4/Cxcl16/Fn1/Trpv4/Sema6b/Cxcl12/Wnt5a/Flt1/Jam3/Pde4b/Ppm1f/Coro1a/Sbds/Dysf/Cxadr/Plxnb3/Amot/Dpep1/Cmtm3/Alox5/Adam10/Ephb1/Prkca/Ccr2/Dusp1/Sema6d/Fgf2/Slit3/Vav3/Vegfc/St6gal1/Creb1/Calr/Csf1r/Mmp2/Efnb2/Sema6a/Thbs1/Prkcd/Parva/Sema3g/Ntn1/Csf1/Lyn/Lpar1/Lsp1/Lbp/Fgf18/Pla2g7/Sema3b/Tgfb1/Swap70/…	128
GO:0018107	peptidyl-threonine phosphorylation	0.00913335	0.39823	8.05633e-09	5.81229e-08	Ppp1r15a/Wnk1/Sphk1/Lrrk2/Wnt5a/Inpp5k/Sbk1/Hipk1/Irgm1/Prkca/Spred2/Tgfbr2/Ogt/Prkcd/Camk2d/Cad/Bcl2/Tgfb1/S1pr2/Akt1/Nlk/Spred1/Dyrk1a/Smad7/Ulk1/Sirt2/Tnks1bp1/Csnk2a1/Dyrk1b/Csnk2b/Stk11/Dmtn/Akt3/Camk2a/Tnks/Cdc42bpb/Mapk8/Ppp2r5d/Acvr1/Rock2/Clk1/Prkaca/Tbk1/Cdc42bpg/Stk39	45
GO:0042116	macrophage activation	0.00913335	0.39823	8.05633e-09	5.81229e-08	Ifngr2/Clu/Adgrf5/Ctsc/Il4ra/Sphk1/Lrrk2/Wnt5a/Dysf/Hspd1/Nampt/Tnip2/Irgm1/Cd200/Pla2g5/Plcg2/Ifi35/Csf1r/Nr1d1/Thbs1/Tmem106a/Sbno2/Tmem229b/Lbp/Fer1l5/Atm/Tlr3/Rora/Tyrobp/Snhg20/Hspa4/Pla2g4a/Cx3cl1/Kcnj8/Naglu/Il33/Ldlr/Tlr2/Kars1/Nr1h3/Jun/Wnk4/Syt11/Lgals9/Stk39	45
GO:0000375	RNA splicing, via transesterification reactions	0.0186726	0.302632	8.59278e-09	6.15646e-08	Cirbp/Rbm3/Ncbp2/Srsf5/Sart1/Syf2/Hnrnpa2b1/Rbm41/Snrpd1/Prpf19/Psip1/Snrpn/Larp7/Mfap1b/Ptbp2/Scaf11/Tra2a/Sf1/Rbfox1/Nsrp1/Rest/Khdc4/Pcbp4/Ctnnbl1/Sf3a2/Prpf6/Lsm6/Ppil1/Hnrnpc/Srsf9/Rnpc3/Dyrk1a/Cdc5l/Khdrbs1/Mettl3/Srrm4/Fxr2/Sf3b3/Rnf113a2/Srsf6/Xab2/Snrpa1/Srsf7/Snrnp35/Ddx17/Snrpf/Dazap1/Dbr1/Obi1/Srpk1/Sf3b2/Hnrnpl/Tia1/Ik/Srrm1/Rbmxl1/Setx/Zrsr2/Lsm2/Rbm7/Prpf40a/Mettl14/Snw1/Sfswap/BC0…	92
GO:0000377	RNA splicing, via transesterification reactions with bulged adenosine as nucleophile	0.0186726	0.302632	8.59278e-09	6.15646e-08	Cirbp/Rbm3/Ncbp2/Srsf5/Sart1/Syf2/Hnrnpa2b1/Rbm41/Snrpd1/Prpf19/Psip1/Snrpn/Larp7/Mfap1b/Ptbp2/Scaf11/Tra2a/Sf1/Rbfox1/Nsrp1/Rest/Khdc4/Pcbp4/Ctnnbl1/Sf3a2/Prpf6/Lsm6/Ppil1/Hnrnpc/Srsf9/Rnpc3/Dyrk1a/Cdc5l/Khdrbs1/Mettl3/Srrm4/Fxr2/Sf3b3/Rnf113a2/Srsf6/Xab2/Snrpa1/Srsf7/Snrnp35/Ddx17/Snrpf/Dazap1/Dbr1/Obi1/Srpk1/Sf3b2/Hnrnpl/Tia1/Ik/Srrm1/Rbmxl1/Setx/Zrsr2/Lsm2/Rbm7/Prpf40a/Mettl14/Snw1/Sfswap/BC0…	92
GO:0000398	mRNA splicing, via spliceosome	0.0186726	0.302632	8.59278e-09	6.15646e-08	Cirbp/Rbm3/Ncbp2/Srsf5/Sart1/Syf2/Hnrnpa2b1/Rbm41/Snrpd1/Prpf19/Psip1/Snrpn/Larp7/Mfap1b/Ptbp2/Scaf11/Tra2a/Sf1/Rbfox1/Nsrp1/Rest/Khdc4/Pcbp4/Ctnnbl1/Sf3a2/Prpf6/Lsm6/Ppil1/Hnrnpc/Srsf9/Rnpc3/Dyrk1a/Cdc5l/Khdrbs1/Mettl3/Srrm4/Fxr2/Sf3b3/Rnf113a2/Srsf6/Xab2/Snrpa1/Srsf7/Snrnp35/Ddx17/Snrpf/Dazap1/Dbr1/Obi1/Srpk1/Sf3b2/Hnrnpl/Tia1/Ik/Srrm1/Rbmxl1/Setx/Zrsr2/Lsm2/Rbm7/Prpf40a/Mettl14/Snw1/Sfswap/BC0…	92
GO:0035329	hippo signaling	0.00466816	0.575	8.981e-09	6.41981e-08	Amotl2/Limd1/Dchs1/Mob1a/Amot/Schip1/Map2k3/Yap1/Nek8/Stk3/Arrdc3/Frmd6/Wtip/Vgll4/Ajuba/Tead3/Mark3/Mapk14/Tead1/Wwc2/Tead4/Amotl1/Fat4	23
GO:0016052	carbohydrate catabolic process	0.0119748	0.353293	9.29346e-09	6.62793e-08	Adrb1/Aldob/Hsd11b1/Galm/Gpd1/Gabarapl1/Manba/Pfkl/Dhtkd1/Ddit4/Phkg1/Flcn/Tigar/Khk/Trp53/Nudt5/Myc/Ogt/Insr/Jmjd8/Glb1/Esrrb/Pgam1/Zbtb20/Ppp1r3d/Ppp1r3b/Galt/Eif6/Mlst8/Slc25a12/Arsb/Hexb/Eno3/Prkaa2/Fkrp/Ids/Git1/Igf1/Pgk1/Ppargc1a/Phkg2/Gpi1/Pgm2/Prxl2c/Ppp1ca/Ctbs/Agl/Prkaa1/Man2c1/Arl2/Pkm/Prkaca/Naga/Man2b1/Cbfa2t3/Ppp2ca/Pfkp/Slc4a4/Gapdh	59
GO:0002685	regulation of leukocyte migration	0.0160341	0.317269	9.59316e-09	6.82601e-08	Apod/Cd74/Pik3r1/Emilin1/Wnk1/Ninj1/Adam17/Jam2/Lgmn/Rin3/Trpv4/Cxcl12/Wnt5a/Jam3/Coro1a/Dysf/Gp1ba/Spns2/Adam10/Ccr2/Cd200/Dusp1/Capn1/Trp53/Vegfc/Calr/Csf1r/Thy1/Mmp14/Thbs1/Csf1/Lyn/Lbp/Aoc3/Pla2g7/Tgfb1/Swap70/Ptk2b/Mcu/Ripor2/Dock8/Akt1/Lgals3/Slit2/Mpp1/Ptk2/Mmp28/Mtus1/Cnn2/Crkl/Ripk3/Cx3cl1/Cxcl14/Nedd9/Il33/Creb3/Tlr2/Selenok/Thbs4/Dnm1l/Mia3/C3ar1/Pecam1/Tirap/Cd47/Camk1d/Cd99l2/Gas6/C1…	79
GO:0030837	negative regulation of actin filament polymerization	0.00649482	0.470588	9.67066e-09	6.86545e-08	Lmod3/Myadm/Tmsb4x/Tmsb10/Spta1/Mkks/Twf2/Add3/Pfn2/Carmil1/Capn1/Lmod2/Prkcd/Eps8/Cfl1/Kank3/Mtpn/Capza1/Tmod3/Slit2/Evl/Arfgef1/Hip1r/Tmod4/Pfn4/Capzb/Tlr2/Dmtn/Pecam1/Sptb/Sptan1/Cyrib	32
GO:0097581	lamellipodium organization	0.00791557	0.423913	9.97076e-09	7.06238e-08	Fscn1/Pik3r1/Fgd4/Whamm/Twf2/Pmp22/Plxnb3/Carmil1/Ablim2/Vav3/Nck1/Aqp1/Cfl1/Abi2/Plce1/Wasf2/Nckap1/Enpp2/Cdc42/Slit2/Bin3/Nck2/Ajuba/Spata13/Capzb/Coro1c/Cyfip1/Auts2/Dmtn/Pdpn/Myo9b/Pxn/Actr2/Itgb1/Ablim1/Vcl/Ccdc88a/Actr3/Snx2	39
GO:0071214	cellular response to abiotic stimulus	0.0202963	0.294118	1.02867e-08	7.25313e-08	Cdkn1a/Bcl2l1/Col1a1/Pik3r1/Trp53inp1/Ints7/Actb/Wnk1/Scx/Ccnd2/Ankrd1/Ptpn11/Egr1/Gja1/Trpv4/Ybx3/Mme/Mmp3/Dysf/Tmem150c/Bag3/Cav1/Ercc1/Sipa1/Hus1/Trp53/Grm1/Mmp2/Wnt11/Casp3/Bmf/Xpc/Cul4b/Aqp1/Lrrc8c/Prkcd/Dhx36/Got1/Parp1/Rest/Sfrp1/Fbxw7/Atm/Tgfb1/Zmpste24/Ripor2/Akt1/Nlk/Swi5/Yap1/Palm/Ruvbl2/Bak1/Agap3/Mapk11/Rhbdd1/Lig4/Mlst8/Mettl3/Mdm2/Snai2/Atp1a1/Ppid/Gnb5/Micu1/Cnn2/Sirt1/Tnks1bp1/Ns…	100
GO:0104004	cellular response to environmental stimulus	0.0202963	0.294118	1.02867e-08	7.25313e-08	Cdkn1a/Bcl2l1/Col1a1/Pik3r1/Trp53inp1/Ints7/Actb/Wnk1/Scx/Ccnd2/Ankrd1/Ptpn11/Egr1/Gja1/Trpv4/Ybx3/Mme/Mmp3/Dysf/Tmem150c/Bag3/Cav1/Ercc1/Sipa1/Hus1/Trp53/Grm1/Mmp2/Wnt11/Casp3/Bmf/Xpc/Cul4b/Aqp1/Lrrc8c/Prkcd/Dhx36/Got1/Parp1/Rest/Sfrp1/Fbxw7/Atm/Tgfb1/Zmpste24/Ripor2/Akt1/Nlk/Swi5/Yap1/Palm/Ruvbl2/Bak1/Agap3/Mapk11/Rhbdd1/Lig4/Mlst8/Mettl3/Mdm2/Snai2/Atp1a1/Ppid/Gnb5/Micu1/Cnn2/Sirt1/Tnks1bp1/Ns…	100
GO:0016051	carbohydrate biosynthetic process	0.0144104	0.328704	1.03751e-08	7.29892e-08	Gnmt/Pth1r/Gpd1/Crtc2/Inpp5k/Nr3c1/Myh9/Gfpt1/Grb10/Slc25a13/Phkg1/Atf4/Ext1/C1qtnf2/Dse/Plcd1/P2ry1/Nr1d1/Gpt2/Sorbs1/Ogt/Irs2/Slc35b4/Got1/Insr/Parp1/Tgfb1/Ndst2/Ptk2b/Epm2a/Esrrb/Pgam1/Akt1/Ppp1r3d/Ppp1r3b/Pdk2/Per2/Adcyap1r1/Dgat2/St8sia6/Gys1/Soga1/St3gal2/Sirt1/Gpd2/Mgat2/Sirt7/Cltc/Zfp692/Igf1/Pgk1/Stk11/Ppargc1a/Phkg2/Gnpda1/B4galt1/Gpi1/Pgm2/Akr1b1/Ppp1ca/P2ry6/Chst14/Cry1/Prkaca/Pcx/Gpt…	71
GO:0046620	regulation of organ growth	0.00974224	0.384	1.05339e-08	7.39389e-08	Pi16/Col14a1/Adrb1/Ccnd2/Gja1/Dusp6/Ybx3/Rgs4/Nr3c1/Cxadr/Bmpr1a/Kcnk2/Gata6/Cited2/Tbx5/Fgf2/Jarid2/Tgfbr2/Hdac2/Smo/Akap6/Ankrd26/Slc25a4/Akt1/Yap1/Fgf9/Mapk11/Mef2c/Trip10/Stk3/Ctdp1/Hlx/Ptk2/Vgll4/Cav3/Sirt1/Agt/Igf1/Bcl2l11/Acacb/Mapk14/Pim1/Tbx2/Wwc2/Zfpm2/Tgfbr3/Tcf7l2/Tbx20	48
GO:0006874	intracellular calcium ion homeostasis	0.0196874	0.296636	1.06058e-08	7.4276e-08	Pth1r/Bnip3/Herpud1/Tmtc4/Selenon/Tmem38b/Ptprc/Trpv4/Xk/Wnt5a/Ibtk/Trpc3/Coro1a/Gp1ba/Ngf/Kctd17/Erc1/1600014C10Rik/Prkca/Cacna1s/Ccr2/Pacs2/Atf4/Casq1/Cav1/Tmem64/Fgf2/Grina/Plcg2/Plcd1/Grm1/Apoe/P2ry1/Thy1/Ank2/Chd7/Plcb4/Rmdn3/Lyn/Camk2d/Cav2/Csrp3/Bok/Akap6/Bcl2/Tcirg1/Tgfb1/Ptk2b/Itgav/Sv2a/Plce1/Casq2/Mcu/Flna/Bak1/Tgfb2/Mtln/Atp13a1/Hexb/Plcb3/Atg5/Hrc/Cav3/Micu1/Itpr3/Ncs1/Tmco1/Cx3cl1/P…	97
GO:0006661	phosphatidylinositol biosynthetic process	0.00852446	0.407767	1.10003e-08	7.68655e-08	Pik3r1/Pigg/Itpkb/Ttc7/Pi4k2a/Efr3b/Socs3/Socs5/Pgap1/Cish/Fgf2/Plcg2/Tmem150a/Pigq/Uvrag/Dpm1/Pigs/Pgap2/Pik3c2b/Pyurf/Smg1/Pigu/Ip6k1/Inppl1/Pigk/Socs2/Pigw/Pgap3/Pigc/Ip6k2/Bpnt1/Ip6k3/Pigo/Itpkc/Cdipt/Atg14/Slc27a1/Bpnt2/Impa1/Pigv/Pik3r3/Pip4k2b	42
GO:0045807	positive regulation of endocytosis	0.0138015	0.333333	1.11604e-08	7.78093e-08	Bcl2l1/Apln/Gata2/Rab27a/Eef2k/Clu/Ahsg/Dab2/Ptprc/Lrrk2/Wnt5a/Ighm/Anxa2/Myh9/Bin1/Tbc1d5/Sirpa/Pla2g5/Cav1/Appl1/Sod1/Plcg2/Mertk/Synj2bp/Rab21/Pros1/Picalm/Apoe/Calr/Cd63/Abca7/Lman2/Colec11/Insr/Dtnbp1/Lbp/Il15/Plk2/Dll1/Arrb2/Cdc42/Ldlrap1/Rab31/Angpt1/Ptk2/Cav3/Appl2/Itsn1/Vtn/Rapgef1/Hip1r/Snap91/Dnm1/Cfp/Hip1/Dnm1l/Cd151/Cd47/Camk1d/Ntf3/Itgb1/Arrb1/Gas6/Smpd1/Kif3a/Nckap1l/Lyar/Cbl	68
GO:0009150	purine ribonucleotide metabolic process	0.0204993	0.292754	1.13394e-08	7.88804e-08	Bcl2l1/Myh7/Xdh/Dcakd/Ak4/Pde4a/Adcy7/Ces1d/Lrrk2/Hmgcs2/Acaca/Adcy1/Nudt4/Nt5c1a/Acsl5/Slc25a13/Flcn/Mmut/Nppb/Prps2/Cfh/Nt5e/Nudt5/Far1/Atp6v1a/Ak3/Myc/Pank1/Adcy6/Entpd1/Gda/Atpsckmt/Parp1/Hmgcs1/Pde5a/Hsd17b4/Pfas/Adcy4/Tgfb1/Rora/Nppa/Gpam/Map2k1/Pdk2/Sphk2/Acot11/Slc25a12/Dgat2/Ndufa2/Opa1/Cox11/Ndufa7/Prkn/Acot1/Ola1/Rhoq/Papss1/Ndufv1/Entpd4b/Adcy3/Fis1/Nme6/Atp5mc2/ATP6/Clpx/Dlat/Ppargc1…	101
GO:0006066	alcohol metabolic process	0.0209052	0.29096	1.16227e-08	8.06707e-08	Cyp1b1/Pth1r/Chka/Adh1/Akr1c14/Errfi1/Sphk1/Itpkb/Ces1d/Dab2/Gpd1/Dhrs7/Hmgcs2/Myh9/Grk3/Dysf/Slc37a2/Pmp22/Bmp6/Nudt4/Erlin2/Stard4/Ppip5k1/Alg14/Sod1/Fgf2/Acer2/Cyp27a1/Plcg2/Myof/Plcd1/Erlin1/Pctp/Cyp51/Apoe/Lss/P2ry1/Dpm1/Plpp3/Sc5d/Sptlc2/Got1/Abca1/Mecp2/Asah2/Rest/Hmgcs1/Thrb/Napepld/Ptk2b/Gnb3/Dhcr7/Alg2/Coq3/Ldlrap1/Sphk2/Dhfr/Gk/Ip6k1/Adcyap1r1/Inppl1/Plpp1/Idh2/Ednrb/Dgat2/Fdft1/Plcb3/…	103
GO:0009755	hormone-mediated signaling pathway	0.0119748	0.35119	1.19584e-08	8.28162e-08	Heyl/Ptpn11/Prcp/Ddrgk1/Fkbp4/Dab2/Prmt2/Nr3c1/Vps11/Klf9/Bmal1/Per1/Bdnf/Kdm3a/Cry2/Adipor2/Appl1/Calr/Tcf21/Nr1d1/Calcoco1/Crebrf/Ghr/Dnaja1/Wbp2/Nr3c2/Parp1/Sfrp1/Trerf1/Thrb/Esrrb/Yap1/Daxx/Rarb/Safb/Nr1d2/Ddx17/Appl2/Ywhah/Sirt1/Safb2/Igf1/Csnk2b/Carm1/Kdm5d/Abhd2/Slc27a1/Nr1h3/Cry1/Cnot9/Kdm4c/Thra/Rhoa/Strn3/Med1/Rara/Ufsp2/Ar/Hdac1	59
GO:0045446	endothelial cell differentiation	0.00933631	0.389831	1.2198e-08	8.42872e-08	Xdh/Fstl1/Myadm/S1pr3/Kdr/Atoh8/Afdn/Sox17/Bmp4/Bmp6/Col27a1/Ptprs/Col18a1/Apold1/Akap11/Foxj2/Fzd2/Zeb1/Ppp1r16b/S1pr2/Heg1/Sox18/Dll1/Vezf1/Zdhhc21/Ednrb/Rapgef3/Rap2c/Rapgef1/Agt/Pbrm1/Pdpn/Clic4/Pecam1/Acvr1/Dmd/Fzd4/Rock2/Tjp1/Stc1/Tie1/Vcl/Cldn5/Abcb1b/Gpx1/Tmem100	46
GO:0043122	regulation of canonical NF-kappaB signal transduction	0.0144104	0.327189	1.28689e-08	8.8726e-08	Tfrc/Cd74/Sqstm1/Wnt5a/Eda2r/Per1/Tnip2/Irgm1/Casp8/Riok3/Ube2n/Cth/Plcg2/Nfkbib/Optn/Nr1d1/Usp20/Dhx36/Tmem106a/Dnaja3/Parp1/Rnf31/Chuk/Alpk1/Jmjd8/Tlr3/Rora/Arrb2/Traf6/Ddx1/Traf3/Trim13/Sphk2/Card6/Angpt1/Stat1/Ror1/Ltbr/Prkn/Sirt1/Ajuba/Ripk3/Dhx15/Lurap1l/Agt/Cx3cl1/Tnfrsf19/Fyn/Trim25/Tnfsf10/Pink1/Tnfaip3/Terf2ip/Zfand6/Eda/Card9/Ube2i/Tirap/Gbp7/Traf4/Irak1/Brd4/Trim5/Rhoa/Traf2/Btrc/Gapd…	71
GO:0018210	peptidyl-threonine modification	0.00953927	0.385246	1.32335e-08	9.0837e-08	Ppp1r15a/Wnk1/Sphk1/Lrrk2/Wnt5a/Inpp5k/Galnt11/Sbk1/Hipk1/Irgm1/Prkca/Spred2/Tgfbr2/Ogt/Prkcd/Camk2d/Cad/Bcl2/Tgfb1/S1pr2/Akt1/Nlk/Spred1/Dyrk1a/Smad7/Ulk1/Sirt2/Galnt16/Tnks1bp1/Csnk2a1/Dyrk1b/Csnk2b/Stk11/Dmtn/Akt3/Camk2a/Tnks/Cdc42bpb/Mapk8/Ppp2r5d/Acvr1/Rock2/Clk1/Prkaca/Tbk1/Cdc42bpg/Stk39	47
GO:1905037	autophagosome organization	0.00953927	0.385246	1.32335e-08	9.0837e-08	Trp53inp1/Atg101/Tom1/Atg13/Lrrk2/Gabarapl1/Map1lc3b/Irgm1/Ulk2/Rab7/Pacs2/Bag3/Trp53inp2/Tmem41b/Wdr45/Ehmt2/Synpo2/Atg4c/Pik3c2b/Ift20/Tcirg1/Map1lc3a/Gabarapl2/Epm2a/Lrba/Traf6/C9orf72/Fez2/Ulk1/Atg5/Sting1/Mtmr3/Gabarap/Pink1/Snx18/Lrsam1/Atg14/Rab23/Rab33b/Atg10/Wdr45b/Ubqln2/Sec22b/Ralb/Rufy4/Ctsd/Pip4k2b	47
GO:1903322	positive regulation of protein modification by small protein conjugation or removal	0.0107571	0.365517	1.37204e-08	9.39398e-08	Fam107a/Dcun1d2/Sphk1/Lrrk2/Ngf/Ubb/Fgfr3/Xiap/Cdk5rap3/Ube2n/Cav1/Rasd2/Nop53/Septin4/Cblb/Dnaja3/Gnl3/Fbxw7/Rchy1/Trib1/Trib2/Sae1/Arrdc3/Angpt1/Ube2d1/Sprtn/Prkn/Ndfip2/Pdcd6/Ube2v2/Rnf40/Pias1/Psmd10/Sumo2/Mapk9/Gabarap/Ube2l3/Pias4/Ahrr/Chfr/Klhl40/Rassf1/Mapk8/Arrb1/Pttg1ip/Mul1/Cry1/Arrdc4/Commd1/Btrc/Amer1/Pias3/Peli1	53
GO:0061001	regulation of dendritic spine morphogenesis	0.00588593	0.491525	1.37459e-08	9.39398e-08	Baiap2/Eef2k/Cux2/Kalrn/Lrrk2/Marcks/Afdn/Caprin1/Epha4/Adam10/Dhx36/Cfl1/Reln/Dnm3/Abi2/Dtnbp1/Ppp1r9a/Dbn1/Opa1/Abi3bp/Efna1/Dnm1l/Caprin2/Actr2/Arhgap44/Bhlhb9/Actr3/Tanc2/Camk2b	29
GO:0071675	regulation of mononuclear cell migration	0.0099452	0.376923	1.51301e-08	1.03173e-07	Apod/Wnk1/Ninj1/Adam17/Jam2/Lgmn/Trpv4/Cxcl12/Wnt5a/Jam3/Coro1a/Spns2/Adam10/Ccr2/Cd200/Dusp1/Calr/Csf1r/Thbs1/Csf1/Lyn/Pla2g7/Tgfb1/Ptk2b/Ripor2/Dock8/Akt1/Lgals3/Slit2/Ptk2/Crkl/Ripk3/Cx3cl1/Cxcl14/Nedd9/Creb3/Selenok/Mia3/C3ar1/Cd47/Cd99l2/Gas6/C1qbp/Stk10/Pdgfd/Rhoa/Nbl1/Lgals9/Stk39	49
GO:1990845	adaptive thermogenesis	0.0121778	0.346821	1.53779e-08	1.04633e-07	Lcn2/Lama4/Adrb1/Alpl/Adam17/Fabp5/Il4ra/Ces1d/Gja1/Trpv4/Bmal1/Kdm3a/Gatm/Grb10/Oma1/Ckb/Ccr2/Flcn/Adipor2/Atf4/Cav1/Cpt2/Pctp/Map2k6/Cidea/Nr1d1/Ogt/Trpv2/Il15/Fabp4/Ybx2/Igf1r/Slc25a4/Prlr/Prkab2/Clic5/Prdm16/Per2/Ip6k1/Acot11/Arrdc3/Appl2/Dock7/Zbtb7b/Stk11/Tfe3/Slc25a44/Ppargc1a/Epas1/Igf2bp2/Scd1/Sfxn5/Nr1h3/Ache/Gnas/Ebf2/Ddit3/Thra/Nova1/Lepr	60
GO:0032092	positive regulation of protein binding	0.00852446	0.403846	1.54209e-08	1.04696e-07	Spta1/Plxnd1/Lrrk2/Wnt5a/Anxa2/Map1lc3b/Bmp4/Ngf/Ramp2/Bdnf/Tmem132a/Cav1/Apoe/Ace/Mfng/Plk2/Lfng/Epb41/Stk3/Bambi/Blk/Prkn/Vtn/Cald1/Sting1/Hip1r/Nvl/Dact1/Usp9x/Hspa4/Ip6k2/Mark3/Caprin2/Arrb1/Nphp3/Ralb/Epb41l5/Cldn5/Actr3/Tcf7l2/Krit1/Usp33	42
GO:0034249	negative regulation of amide metabolic process	0.0156282	0.316872	1.55795e-08	1.05542e-07	Eif4ebp1/Clu/Limd1/Sphk1/Mettl16/Tnrc6a/Caprin1/Bin1/Igfbp5/Prkca/Ago4/Tob1/Apoe/Dcp2/Calr/Atcay/Eif4e/Pcif1/Zfp36/Pan2/Rida/Pnpt1/Abca7/Rtn3/Dhx36/Eprs1/Ifrd2/Trim3/Exosc5/Tsc1/Malsu1/Ybx2/Eif6/Cpeb1/Mettl3/Wtip/Fxr2/Mrpl13/Ajuba/Tnrc6c/Hnrnpr/Tia1/Eif4ebp2/Igf1/Parn/Ago3/Zfp36l2/Plekhn1/Noct/Srp9/Trim2/Caprin2/Igf2bp2/Otud6b/Mettl14/Samd4/Lsm14a/Enc1/Map3k20/Prnp/Exosc2/Rock2/Fxr1/Eif4enif1/Cno…	77
GO:0098727	maintenance of cell number	0.0144104	0.325688	1.59267e-08	1.0766e-07	Loxl2/Gata2/Actb/Selenon/Ldb1/Tet1/Foxo3/Brms1l/Kdm3a/Fgfr3/Bmpr1a/Prrx1/Zfp322a/Wdr62/Eif4e/Myc/Hdac2/Ogt/Bcl9l/Wdr43/Smarcb1/Smo/Bcl7c/Tcf15/Rest/Sfrp1/Leo1/Gnl3/Med12/Ing1/Bcl7b/Esrrb/Dll1/Ldb2/Yap1/Prdm16/Lig4/Setd1a/Smc1a/Klf10/Mettl3/Med15/Rtf1/Crebbp/Hook3/Igf1/Ctr9/Tead3/Mtf2/Zfp36l2/Sap30/Rif1/Cdh2/Mettl14/Paf1/Mapk8/Tead1/Fancc/Eif4enif1/Kdm4c/Tead4/Dis3l2/Brms1/Ddx6/Jmjd1c/Stag2/Med28/…	71
GO:0061912	selective autophagy	0.00811853	0.412371	1.66992e-08	1.12637e-07	Retreg1/Sqstm1/Atg13/Ddrgk1/Gabarapl1/Irgm1/Ulk2/Rab7/Bag3/Tigar/Trp53/Optn/Calr/Usp30/Ogt/Sptlc2/Aup1/Rnf31/Atm/Tgfb1/Lrba/Slc25a4/Stk3/Ulk1/Atg5/Prkn/Sting1/Spata33/Clec16a/Wdr81/Tlr2/Pink1/Snx18/Lrsam1/Atg14/Ufc1/Cry1/Tbk1/Tex264/Rnf213	40
GO:0055002	striated muscle cell development	0.00690075	0.447368	1.68546e-08	1.13194e-07	Myh7/Lmod3/Actg1/Myom2/Xirp1/Ankrd23/Synpo2l/Acta1/Actc1/Casq1/Cflar/Lmod2/Pgm5/Hdac2/Myoz2/Nrap/Tnnt2/Csrp3/Tmod3/Casq2/Mef2c/Large1/Csrp2/Cav3/Myh10/Nebl/Tmod4/Csrp1/Wdr1/Actn2/Itgb1/Dmd/Ldb3/Neb	34
GO:0060997	dendritic spine morphogenesis	0.00690075	0.447368	1.68546e-08	1.13194e-07	Baiap2/Eef2k/Cux2/Kalrn/Lrrk2/Marcks/Afdn/Caprin1/Epha4/Adam10/Ephb1/Dhx36/Cfl1/Reln/Dnm3/Abi2/Dtnbp1/Ppp1r9a/Dlg4/Cdc42/Dbn1/Opa1/Abi3bp/Efna1/Dnm1l/Caprin2/Actr2/Prmt3/Arhgap44/Bhlhb9/Actr3/Myo5b/Tanc2/Camk2b	34
GO:0006470	protein dephosphorylation	0.0152222	0.319149	1.69426e-08	1.1354e-07	Ptprf/Ppp1r15a/Itga1/Vcan/Mgat5/Dusp3/Ptpn11/Ptprn/Dusp6/Ptprc/Ctdsp2/Ppm1f/Ppp2r3a/Cry2/Pdp1/Dusp1/Ptprs/Pdp2/Rngtt/Ppm1l/Tns2/Ppm1h/Nck1/Slc39a10/Ptp4a3/Prkcd/Ptpn3/Igbp1/Tsc1/Bcl2/Tgfb1/Dusp10/Swap70/Ppp1r16b/Epm2a/Dusp22/Ptpa/Ppp1r2/Ptpru/Ppp2r2a/Ptpra/Ctdp1/Ppm1k/Ptpn4/Nsmf/Ppm1j/Mtmr3/Ptprd/Ptpn6/Dusp16/Sdhaf2/Stk11/Dusp11/Dusp4/Acp1/Pink1/Eya2/Pptc7/Ywhab/Ppp1r11/Ppp2r5d/Ppp1ca/Ppp3cb/Hsp9…	75
GO:0071711	basement membrane organization	0.00466816	0.560976	1.71461e-08	1.14657e-07	Col3a1/Pxdn/Clasp1/Nid1/Col4a1/Pmp22/Ramp2/Lamb1/Fktn/Ext1/Cav1/Lamc1/Cav2/Clasp2/Flrt2/Ric8a/Lama2/Large1/Phldb2/Fkrp/Itgb1/Lamb3/Pomt2	23
GO:0097061	dendritic spine organization	0.00872742	0.398148	1.72699e-08	1.15237e-07	Baiap2/Eef2k/Cux2/Lgmn/Kalrn/Lrrk2/Marcks/Afdn/Caprin1/Epha4/Adam10/Ephb1/Apoe/Dhx36/Cfl1/Reln/Dnm3/Insr/Abi2/Dtnbp1/Ppp1r9a/Dlg4/Igf1r/Cdc42/Dbn1/Opa1/Abi3bp/Tanc1/Efna1/Fyn/Mtmr2/Nedd9/Dnm1l/Caprin2/Actr2/Prnp/Prmt3/Arhgap44/Bhlhb9/Actr3/Myo5b/Tanc2/Camk2b	43
GO:0016072	rRNA metabolic process	0.0160341	0.313492	1.73172e-08	1.15293e-07	Mettl16/Sbds/Sart1/Las1l/Eri1/Riok3/Trmt2b/Rps27rt/Trp53/Nop53/Trir/Tfb1m/Ngdn/Rpp25/Wdr43/Chd7/Smarcb1/Suv39h1/Exosc5/Ddx56/Nsun4/Polr1e/Nop14/Lsm6/Utp3/Gtf3c1/Top1/Eif6/Rrs1/Dkc1/Abt1/Nat10/Npm3/Ddx17/Dimt1/Tsr3/Gtpbp4/Pop7/Nvl/Ddx27/Cavin1/Nob1/Dhx37/Sirt7/Utp20/Emg1/Mrm1/Slx9/Utp6/Rsl1d1/Rpl10a/Ubtf/Spin1/Mrm2/Rrp12/Rexo4/Utp23/Nhp2/Wdr46/Krr1/Srfbp1/Exosc2/Mettl18/Rps28/Rnasel/Rpl7l1/Rps25/D…	79
GO:0060999	positive regulation of dendritic spine development	0.00629186	0.469697	1.73525e-08	1.15293e-07	Baiap2/Eef2k/Cux2/Kalrn/Marcks/Nr3c1/Afdn/Caprin1/Apoe/Dhx36/Cfl1/Reln/Lpar1/Mecp2/Ppp1r9a/Palm/Dbn1/Opa1/Itsn1/Crebbp/Camk1/Pbrm1/Dnm1l/Llph/Caprin2/Actr2/Eif4g2/Mapk6/Bhlhb9/Actr3/Camk2b	31
GO:0051647	nucleus localization	0.00487112	0.545455	1.7706e-08	1.17391e-07	Nr3c1/Bin1/Clmn/Nudc/Ntn1/Syne2/Lmnb2/Lmna/Tacc1/Cdc42/Syne3/Lmnb1/Dctn1/Cdk9/Ptk2/Cav3/Myh10/Sirt1/Dock7/Hook3/Dmd/Hhex/Tlk2/Tacc2	24
GO:0002062	chondrocyte differentiation	0.00953927	0.382114	1.78925e-08	1.18375e-07	Col3a1/Serpinh1/Ccn2/Loxl2/Pth1r/Scx/Twsg1/Rflnb/Ptpn11/Zbtb16/Bmp4/Bmp6/Col27a1/Sulf1/Bmpr1a/Prkca/Ift80/Ext1/Hspg2/Fosl2/Tgfbr2/Sox6/Slc26a2/Efemp1/Mustn1/Adamts7/Trps1/Thrb/Trip11/Fgf18/Tgfb1/Rarb/Fgf9/Mef2c/Lnpk/Smad7/Snai2/Chsy1/Cytl1/Mapk14/Mia3/Smad3/Bpnt2/Arid5a/Sulf2/Mboat2/Ext2	47
GO:0120161	regulation of cold-induced thermogenesis	0.01096	0.36	1.84807e-08	1.22007e-07	Lcn2/Lama4/Adrb1/Alpl/Adam17/Fabp5/Il4ra/Gja1/Bmal1/Kdm3a/Gatm/Grb10/Oma1/Ccr2/Flcn/Adipor2/Atf4/Cav1/Cpt2/Pctp/Map2k6/Cidea/Nr1d1/Ogt/Trpv2/Il15/Fabp4/Ybx2/Igf1r/Prlr/Prkab2/Prdm16/Per2/Ip6k1/Acot11/Arrdc3/Appl2/Dock7/Zbtb7b/Stk11/Tfe3/Slc25a44/Ppargc1a/Epas1/Scd1/Sfxn5/Nr1h3/Ache/Gnas/Ebf2/Ddit3/Thra/Nova1/Lepr	54
GO:0010717	regulation of epithelial to mesenchymal transition	0.00832149	0.405941	1.90881e-08	1.2575e-07	Col1a1/Loxl2/Clasp1/Lrg1/Dab2/Bmp4/Epha4/Spred2/Tgfb1i1/Rgcc/Dact3/Tgfbr2/Hdac2/Bcl9l/Mcrip1/Sfrp1/Clasp2/Tgfb1/Glipr2/Spred1/Gcnt2/Tgfb2/Smad7/Tgfb3/Ldlrad4/Bambi/Ptk2/Mad2l2/Agt/Phldb2/Sdhaf2/Efna1/Pdpn/Smad3/Acvr1/Ppp2ca/Mark1/Tgfbr3/Tcf7l2/Tbx20/Dab2ip	41
GO:0071453	cellular response to oxygen levels	0.0115689	0.351852	1.94162e-08	1.27641e-07	Egln3/Hif3a/Eif4ebp1/Ak4/Bnip3/Fndc1/Egr1/Zfas1/Epha4/Fas/Kcnk2/Gata6/Cited2/Cav1/Rgcc/Hyou1/Tigar/Trp53/Nop53/Atp6v1a/Myc/Ogt/Aqp1/Kcnd2/Kcnk3/Suv39h1/Tsc1/Dnmt3a/Bcl2/Tgfb1/Rora/Akt1/Egln2/Map2k1/Atp6v1g1/Daxx/Cr1l/Ptgis/Mlst8/Cpeb1/Sirt2/Sirt1/P4hb/Ajuba/Npepps/Pgk1/Bmyc/Pink1/Fam162a/Ado/Epas1/Rock2/Ndufs4/Commd1/Gnb1/Atp6v0d1/Higd1a	57
GO:0001778	plasma membrane repair	0.0038563	0.633333	1.95089e-08	1.2798e-07	Anxa2/Myh9/Dysf/S100a10/Myof/Ahnak/Fer1l5/Chmp6/Rab3a/Cav3/Chmp4b/Myh10/Chmp2a/Casp7/Chmp1b/Smpd1/Syt11/Syt7/Chmp5	19
GO:2001244	positive regulation of intrinsic apoptotic signaling pathway	0.00669779	0.452055	1.9863e-08	1.30028e-07	Clu/Nacc2/Serinc3/Siah1a/Steap3/Ubb/Flcn/Cav1/Sod1/Trp53/Septin4/Myc/Nck1/Mcl1/Plscr1/Fbxw7/Bok/Skil/Nck2/Taf6/Sirt1/Ripk3/Prkra/Fis1/Bmyc/Bcl2l11/Bclaf1/Pias4/Dnm1l/Ddit3/Msx1/Plagl2/Fbh1	33
GO:0090150	establishment of protein localization to membrane	0.016846	0.307407	2.06347e-08	1.34787e-07	Reep1/Bcs1l/Wnk1/Inpp5k/Afdn/Srp68/Zdhhc4/Agk/Vps37b/Rab7/Sacm1l/Washc1/Get4/Timm22/Pex16/Kcnb1/Optn/Csk/Tamalin/Chm/Pdcd5/Snx27/Ogt/Get1/Zdhhc9/Exoc4/Srp54c/Sec63/Ap3b1/Rftn1/Sgta/Syne3/Rtp4/Tcaf1/Stom/Tcaf2/Zdhhc21/Rab31/Grin3b/Atp13a1/C2cd5/Large1/Get3/Chmp4b/Bag6/Hspa4/Rab5if/Naca/Rab8b/Tmco1/Sec61a2/Mmgt1/Macf1/Grip2/Fyn/Erbb2/Gorasp2/Myo1c/Arl6/Fis1/Sec62/Nectin3/Dmtn/Srp9/Vamp3/Colq/Cd24a/…	83
GO:0050900	leukocyte migration	0.0227319	0.281407	2.06767e-08	1.34787e-07	Apod/Itga6/Cd34/Cd74/Pik3r1/Itga9/Itga1/Emilin1/Wnk1/Ninj1/Adam17/Jam2/Lgmn/Rin3/Vcam1/Pf4/Cxcl16/Trpv4/Cxcl12/Wnt5a/Flt1/Jam3/Pde4b/Coro1a/Sbds/Dysf/Gp1ba/Cxadr/Dpep1/Spns2/Alox5/Adam10/Prkca/Ccr2/Sirpa/Cd200/Dusp1/Ext1/Capn1/Vav3/Trp53/Vegfc/Calr/Csf1r/Thy1/Mmp2/Mmp14/Thbs1/Eps8/Csf1/Lyn/Lbp/Aoc3/Pla2g7/Tgfb1/Swap70/Ptk2b/Mcu/Ripor2/Dock8/Akt1/Lgals3/Cdc42/Slit2/Mpp1/Gbf1/Ednrb/Ptk2/Mmp28/Mtus1…	112
GO:0001894	tissue homeostasis	0.0174548	0.303887	2.09274e-08	1.35569e-07	Col3a1/Tuba1a/Cd34/Tfrc/Ccn2/Pth1r/Tspan12/Ptgs1/Col14a1/Gata2/Alpl/Scx/Mkks/Ahsg/Pbld1/Errfi1/Ptpn11/Ldb1/Acaca/Coro1a/Cxadr/Slc28a2/Adora2a/Prom1/Il20rb/Prkca/Ccr2/Xiap/Rab7/Atp1b2/Apbb2/Ext1/Tmem64/Sod1/Trp53inp2/Crocc/Nt5e/Whrn/Creb1/Csf1r/Clcn3/Fosl2/Csk/Csf1/Smo/Cd38/Bcl2/Tcirg1/Ptk2b/Itgav/Esrrb/Ldb2/Traf6/Gcnt2/Yap1/Zeb2/Slc22a5/Angpt1/Rab3d/Vstm4/Ank/Usp45/Tns3/Chmp4b/Lca5/Slc12a2/Naglu/…	86
GO:0032412	regulation of monoatomic ion transmembrane transporter activity	0.0174548	0.303887	2.09274e-08	1.35569e-07	Adrb1/Ifngr2/Selenon/Zfas1/Taco1/Scn4b/Sco1/Kcnc1/Pde4b/Cacnb2/Hecw2/Dysf/Bmp4/Alox5/Prkca/Ppif/Ccr2/Cnksr3/Atp1b2/Kcnj11/Casq1/Cav1/Gopc/Plcg2/Fhl1/Cabp1/Wnk2/Snx27/Tmem168/Fxyd6/Ank2/Abcb1a/Cfl1/Reln/Ptpn3/Kcnk3/Gpd1l/Crbn/Atpsckmt/Camk2d/Ahnak/Nr3c2/Abcc9/Akap6/Dlg4/Ptk2b/Casq2/Nppa/Mef2c/Sphk2/Tcaf1/Stom/Tcaf2/Rapgef3/Gsg1l/Hrc/Strit1/Cav3/Rnf207/Gnb5/Ywhah/Rem1/Kcnj8/Wwp2/Asph/Amigo1/Ppargc1…	86
GO:0060249	anatomical structure homeostasis	0.0174548	0.303887	2.09274e-08	1.35569e-07	Col3a1/Tuba1a/Cd34/Tfrc/Ccn2/Pth1r/Tspan12/Ptgs1/Col14a1/Gata2/Alpl/Scx/Mkks/Ahsg/Pbld1/Errfi1/Ptpn11/Ldb1/Acaca/Coro1a/Cxadr/Slc28a2/Adora2a/Prom1/Il20rb/Prkca/Ccr2/Xiap/Rab7/Atp1b2/Apbb2/Ext1/Tmem64/Sod1/Trp53inp2/Crocc/Nt5e/Whrn/Creb1/Csf1r/Clcn3/Fosl2/Csk/Csf1/Smo/Cd38/Bcl2/Tcirg1/Ptk2b/Itgav/Esrrb/Ldb2/Traf6/Gcnt2/Yap1/Zeb2/Slc22a5/Angpt1/Rab3d/Vstm4/Ank/Usp45/Tns3/Chmp4b/Lca5/Slc12a2/Naglu/…	86
GO:0010507	negative regulation of autophagy	0.00710371	0.4375	2.11408e-08	1.36667e-07	Wnk1/Hmox1/Lrrk2/Nampt/Qsox1/Dap/Washc1/Tigar/Trp53/Wdr6/Ehmt2/Stk38l/Usp30/Bmf/Mcl1/Rragc/Tsc1/Bcl2/Akt1/Golga2/Rubcn/Mlst8/Nrbp2/Fez2/Ptk2/Sirt2/Clec16a/Slc7a5/Pink1/Tnfaip3/Eif4g2/Klhl22/Sec22b/Rasip1/Lepr	35
GO:0010948	negative regulation of cell cycle process	0.0188756	0.296178	2.28984e-08	1.47722e-07	Cdkn1a/Fam107a/Rps6ka2/Ccnd1/Fbxo31/Ints7/Nacc2/Nek1/Ptpn11/Gas1/Miip/Prmt2/Ctdsp2/Dync1li1/Bmp4/Grb14/Fgfr3/Syf2/Cdk5rap3/Apbb2/Rgcc/Ccng1/Hus1/Fhl1/Trp53/Nop53/Prpf19/Gpnmb/Xpc/Taok3/Fbxo7/Eme2/Nsun2/Bcl2/Atm/Xrcc3/Creb3l1/Smarca5/Rpa2/Etaa1/Rbbp8/Crlf3/Timeless/Nabp2/Cdkn2d/Atrip/Cdc5l/Mdm2/Ppp1r10/Sirt1/Zwint/Baz1b/Chmp2a/Dact1/Ik/Atf5/Rad21/Trp53bp1/Rfwd3/Taok1/Nme6/Mad2l1/Tom1l1/Zfp36l2/Rbl…	93
GO:0032006	regulation of TOR signaling	0.0113659	0.352201	2.47398e-08	1.59174e-07	Sesn1/Kdr/Sik3/Sesn3/Armh4/Fnip2/Bmal1/Rnf152/Gpr137c/Ddit4/Ube2n/Flcn/Gpr155/Castor1/Ubr2/Gpat3/Reln/Rragc/Tsc1/Atm/Wdr59/Epm2a/Zmpste24/Mios/Akt1/Nlk/C9orf72/Mlst8/Ywhaz/Ube2d1/Rnf167/Tbck/Spaar/Kptn/Sirt1/Prkaa2/Pdcd6/Clec16a/Sh3bp4/Usp9x/Stk11/Rps6ka1/Akt3/Xbp1/Pim1/Telo2/Gas6/Prkaa1/Klhl22/Prkaca/Akt1s1/Itfg2/Tbk1/Nckap1l/Ube2w/Depdc5	56
GO:1901861	regulation of muscle tissue development	0.00568297	0.491228	2.47759e-08	1.59174e-07	Lox/Cenpf/Hdac9/Lmod3/Gja1/Ybx3/Bmp4/Igfbp5/Bdnf/Flcn/Cdon/Creb1/Usp2/Mrtfb/Bcl2/Tgfb1/Rpl3l/Dll1/Mef2c/Sirt2/Naca/Ppargc1a/Smad3/Hmgcr/Prkaa1/Nras/Erbb3/Tcf7l2	28
GO:1904019	epithelial cell apoptotic process	0.0115689	0.349693	2.493e-08	1.59833e-07	Bcl2l1/Gata2/Akr1c14/Kdr/Hmox1/Foxo3/Bmp4/Fas/Ngf/Ramp2/Cd248/Hipk1/Tnip2/Casp8/Pla2r1/Rgcc/Cflar/Col18a1/Wnt11/Tgfbr2/Zfp36/Myc/Casp3/Thbs1/Casp6/Agap2/Bok/Bcl2/Tgfb1/Igf1r/Tek/Arrb2/Yap1/Itgb3bp/Stk3/Adar/Lims1/Sema5a/Angpt1/Srsf6/Ecscr/Prkaa2/Col4a3/Tia1/Igf1/Carm1/Ppargc1a/Pias4/Tnfaip3/Xbp1/Mapk8/Capn10/Gas6/Prkaa1/Tcf7l2/Krit1/Plcg1	57
GO:0000422	autophagy of mitochondrion	0.0077126	0.417582	2.51283e-08	1.60443e-07	Retreg1/Bnip3/Sqstm1/Atg13/Gabarapl1/Map1lc3b/Irgm1/Ulk2/Fundc1/Tigar/Trp53/Optn/Wdr45/Usp30/Ogt/Fbxo7/Fbxw7/Map1lc3a/Gabarapl2/Lrba/Slc25a4/Ulk1/Atg5/Prkn/Spata33/Clec16a/Fbxl4/Fis1/Gabarap/Pink1/Parl/Atg14/Dnm1l/Srebf1/Capn10/Wdr45b/Mul1/Fkbp8	38
GO:0061726	mitochondrion disassembly	0.0077126	0.417582	2.51283e-08	1.60443e-07	Retreg1/Bnip3/Sqstm1/Atg13/Gabarapl1/Map1lc3b/Irgm1/Ulk2/Fundc1/Tigar/Trp53/Optn/Wdr45/Usp30/Ogt/Fbxo7/Fbxw7/Map1lc3a/Gabarapl2/Lrba/Slc25a4/Ulk1/Atg5/Prkn/Spata33/Clec16a/Fbxl4/Fis1/Gabarap/Pink1/Parl/Atg14/Dnm1l/Srebf1/Capn10/Wdr45b/Mul1/Fkbp8	38
GO:0090174	organelle membrane fusion	0.00974224	0.375	2.55151e-08	1.62579e-07	Doc2b/Tom1/Sphk1/Vps11/Coro1a/Dysf/Erc1/Vamp8/Samd9l/Rab7/Pla2g5/Vav3/Uvrag/Septin8/Rab20/Tbc1d4/Grik5/Cav2/Fer1l5/Chmp6/Cplx2/Rab3a/C2cd5/Chmp4b/Yipf7/Chmp2a/Pla2g4a/Rab8b/Stxbp1/Vamp3/Snap47/Rab34/Chmp1b2/AU040320/Chmp1b/Snap29/Stx8/Snap23/Ankrd27/Sec22b/Yipf4/Vcpip1/Eea1/Syt3/Syt11/Syt7/Pip4k2b/Chmp5	48
GO:0009410	response to xenobiotic stimulus	0.0202963	0.289017	2.73002e-08	1.73597e-07	Fmo2/Rorc/Lcn2/Sult1a1/Tfrc/Cyp1b1/Gsta3/Cyp2d22/Mgst1/Bche/Kdr/Pde4a/Adam17/Ankrd1/Nos2/Errfi1/Gstm1/Pde4b/Ppm1f/Nqo1/Cyp26b1/Add3/Dpep1/Srp68/Bdnf/Gsta4/Pon3/Kcnj11/Gata6/N6amt1/Nudt15/Sod1/Tigar/Vav3/Trp53/Rap2a/Cbr1/Dpyd/Creb1/Ehmt2/Nfatc2/Fosl2/Gclm/Mmp2/Kcnh2/Tgfbr2/As3mt/Myc/Kcnk3/Dnmt1/Gstm2/Blmh/Cad/Rest/Sfrp1/Abcc9/Cd38/Mcm7/Bcl2/Rora/Uchl1/Ggh/Mef2c/Ywhaz/Fmo1/Atg5/Atp1a1/Crkl/Prkaa2/G…	100
GO:1902115	regulation of organelle assembly	0.0148163	0.318777	2.75415e-08	1.74775e-07	Fscn1/Lcp1/Lrrk2/Wnt5a/Vps11/Caprin1/Spice1/Kctd17/Intu/Odf2/Dynll1/Lrrc4b/Cep97/Ptprs/Sdccag8/Crocc/Wdr45/Ehmt2/Cenpj/Arhgef9/Syne2/Odf2l/Ift20/Lpar1/Cntrob/G3bp1/Atmin/Chmp6/Ptk2b/Plk2/Ripor2/Akt1/Yap1/Ttbk2/C9orf72/Ift46/Fez2/Ulk1/Atg5/Abi3bp/Cav3/Chmp4b/Prkaa2/Lrfn4/Chmp2a/Tchp/Mtmr3/Ptprd/Mapk9/Arf4/Pink1/Snx18/Lrsam1/Dync2li1/Ift140/Mapk8/Chmp1b/Mark4/Mdm1/Wdr44/Tapt1/Evi5l/Prkaa1/Ubqln2/Cd…	73
GO:0050866	negative regulation of cell activation	0.0146134	0.32	2.86714e-08	1.81574e-07	H2-Aa/Cd74/Emilin1/Bcl6/Twsg1/Adgrf5/Dusp3/Il4ra/Hmox1/Fn1/Bmp4/Fas/Adora2a/Cygb/Zbtb46/Socs5/Il20rb/Ccr2/Cd200/Tbc1d10c/Pla2g5/Mertk/Apoe/Nr1d1/Gpnmb/Casp3/Fbxo7/Prkcd/Cd276/Cblb/Lyn/Sfrp1/Pde5a/Atm/Tgfb1/Glmn/Dusp22/Ripor2/Tnfrsf21/Lgals3/Cbfb/Tyrobp/Zc3h8/Smad7/Zfp608/Cd274/Hlx/Gclc/Cx3cl1/Zbtb7b/Ptpn6/Irf1/Erbb2/Lrrc32/Vsir/C1qtnf1/Ldlr/Tnfaip3/Cd24a/Pag1/Nr1h3/Prnp/Ctla4/Enpp3/Hmgb3/Pkn1/Nck…	72
GO:0006520	amino acid metabolic process	0.016846	0.305147	2.97983e-08	1.88327e-07	Gnmt/Cdo1/Glul/Ahcy/Cyp2d22/Prodh/Ddo/Fah/Aldh18a1/Nos2/Mtr/Mthfr/Aasdh/Cars2/Gfpt1/Aspa/Dpep1/Ahcyl/Hibch/Comt/Ass1/Atf4/Hsd17b10/Mmut/Cth/Asrgl1/Asl/Dars2/Atcay/Gclm/Gpt2/Yars2/Eprs1/Got1/Blmh/Mecp2/Cad/Vars1/Bckdha/Pfas/Tars2/Apip/Sdsl/Odc1/Azin1/Dhfr/Fpgs/Slc25a12/Slc16a2/Lrrc47/Wars2/Kyat3/Dglucy/Sirt4/Gclc/Mtrr/Aars1/Slc25a44/Gls/Kars1/Vars2/Sars1/Gstz1/Dbt/Qdpr/Ctps1/Acadsb/Ddc/Dld/Hars2/M…	83
GO:0046165	alcohol biosynthetic process	0.0105541	0.361111	2.98609e-08	1.8834e-07	Pth1r/Sphk1/Itpkb/Ces1d/Dab2/Hmgcs2/Myh9/Bmp6/Erlin2/Ppip5k1/Sod1/Fgf2/Acer2/Cyp27a1/Plcg2/Plcd1/Erlin1/Cyp51/Apoe/Lss/P2ry1/Sc5d/Sptlc2/Got1/Asah2/Rest/Hmgcs1/Ptk2b/Dhcr7/Sphk2/Dhfr/Ip6k1/Adcyap1r1/Fdft1/Prkaa2/Ip6k2/Abcg1/Ip6k3/Itpkc/Pts/Asah1/Srebf1/Hmgcr/Insig2/Akr1b1/P2ry6/Qdpr/Prkaa1/Hsd17b7/Cyb5r3/Ephx1/Plcg1	52
GO:0071604	transforming growth factor beta production	0.00466816	0.547619	3.17706e-08	1.99731e-07	Col3a1/Lum/Ltbp1/Fbln1/Fn1/Bmpr1a/Cd200/Gata6/Furin/Nrros/Creb1/Wnt11/Cd2ap/Thbs1/Laptm4b/Itgav/Tyrobp/Tgfb2/Agt/Cx3cl1/Lrrc32/Cd24a/Smad3	23
GO:0085029	extracellular matrix assembly	0.00487112	0.533333	3.17953e-08	1.99731e-07	Col3a1/Lox/Col1a2/Pxdn/Emilin1/Gpm6b/Clasp1/Ltbp4/Eln/Ramp2/Lamb1/Qsox1/Rgcc/Antxr1/Tnxb/Efemp2/Clasp2/Tgfb1/Mad2l2/Agt/Phldb2/Smad3/Lamb3/Tie1	24
GO:0051100	negative regulation of binding	0.0117719	0.345238	3.18996e-08	1.99982e-07	Cdkn1a/Nes/Ptprf/Actb/Xirp1/Hmox1/Dab2/Lrrk2/Dysf/Arhgap28/Cav1/Sympk/Tmc8/Ace/P2ry1/Larp7/Myc/Hdac2/Tfap4/Smo/Mecp2/Rest/Dtnbp1/Plscr1/Fbxw7/Rgma/Plk2/Ybx2/Akt1/Golga2/Arrb2/Ppp1r2/Wfikkn2/Ttbk2/Per2/C9orf72/Ifit2/Sirt1/Gtpbp4/Dact1/Hspa4/Mad2l2/Carm1/Camk1/Nfatc4/Btaf1/Tnks/Gnl3l/Ccm2l/Mapk8/Jun/Ddit3/Ralb/Epb41l5/Msx1/Gemin2/Usp33/Fbh1	58
GO:0019827	stem cell population maintenance	0.0140045	0.323944	3.20275e-08	2.0038e-07	Loxl2/Gata2/Actb/Ldb1/Tet1/Foxo3/Brms1l/Kdm3a/Fgfr3/Bmpr1a/Prrx1/Zfp322a/Wdr62/Eif4e/Myc/Hdac2/Ogt/Bcl9l/Wdr43/Smarcb1/Smo/Bcl7c/Tcf15/Rest/Sfrp1/Leo1/Gnl3/Med12/Ing1/Bcl7b/Esrrb/Dll1/Ldb2/Yap1/Prdm16/Lig4/Setd1a/Smc1a/Klf10/Mettl3/Med15/Rtf1/Crebbp/Hook3/Ctr9/Tead3/Mtf2/Zfp36l2/Sap30/Rif1/Cdh2/Mettl14/Paf1/Mapk8/Tead1/Fancc/Eif4enif1/Kdm4c/Tead4/Dis3l2/Brms1/Ddx6/Jmjd1c/Stag2/Med28/Tcf7l1/Tcf7l2…	69
GO:0035264	multicellular organism growth	0.0148163	0.317391	3.36713e-08	2.10241e-07	Col3a1/Adrb1/Ppp1r13l/Sik3/Mkks/Lgmn/Zfp950/Nek1/Ptpn11/Siah1a/Adarb1/Pmp22/Ext1/Sod1/Ercc1/Trp53/Xrcc2/Tns2/Creb1/Fosl2/Apba1/Ghr/Chd7/Csf1/Llgl2/Smo/Chaserr/Suv39h1/Pcnt/Bcl2/Atm/Ankrd26/Heg1/Lncpint/Zmpste24/Sgpl1/Dhcr7/Gpam/Daxx/Rarb/Stk40/Atp8a2/Atrn/Socs2/Large1/Tnks2/Agt/Slc12a2/Gpd2/Atf5/Igf1/H19/Ptch1/Sp2/Xpa/Gpat4/Clic4/Stat5a/Rmi1/Gnas/Dmd/Hhex/Meg3/Plag1/Sos1/Brca2/Rara/Hmga1/Ttc8/Tcf…	73
GO:0032102	negative regulation of response to external stimulus	0.0263852	0.268041	3.86387e-08	2.40774e-07	Ets1/Sema3c/Nrp1/Mkks/Dusp3/Rin3/Clasp1/Sema6b/Ttll12/Wnt5a/Anxa2/Trafd1/Tspan6/Htra1/Gp1ba/Epha4/Adora2a/Stat2/Socs3/Alox5/Irgm1/Socs5/Il20rb/Riok3/Irak3/Sirpa/Cd200/Dusp1/Sema6d/Pla2g5/Sod1/Fgf2/Ptprs/Pros1/Nt5e/Xylt1/St6gal1/Plat/Apoe/Gps2/Nr1d1/Zfp36/Sema6a/Thbs1/Prkcd/Sema3g/Plau/Cd276/Nploc4/Fem1a/Dnaja3/Parp1/Clasp2/Rgma/Sema3b/Tgfb1/Dusp10/Trib1/Ctla2a/Rora/Trim65/Akt1/Serpinb9/Arrb2/Dtx4…	130
GO:0090101	negative regulation of transmembrane receptor protein serine/threonine kinase signaling pathway	0.0107571	0.355705	3.9622e-08	2.46407e-07	Emilin1/Twsg1/Hjv/Adam17/Igsf1/Pbld1/Ltbp1/Peg10/Fbn1/Wnt5a/Adamtsl2/Tet1/Htra1/Brms1l/Spred2/Smurf2/Gpr155/Cav1/Synj2bp/Aspn/Trp53/Tob1/Nrros/Cidea/Hdac2/Ogt/Bcl9l/Cav2/Sfrp1/Ing1/Rasl11b/Skil/Spred1/Prdm16/Wfikkn2/Bmper/Smad7/Tgfb3/Pmepa1/Ldlrad4/Bambi/Sirt1/Sap30/Fstl3/Xbp1/Acvr1/Brms1/Htra3/Tgfbr3/Nbl1/Tcf7l2/Tbx20/Hdac1	53
GO:0032204	regulation of telomere maintenance	0.00791557	0.40625	4.09559e-08	2.54194e-07	Actr8/Hnrnpa2b1/Ercc1/Ino80c/Dcp2/Myc/Nfrkb/Dhx36/Uchl5/Lmna/Parp1/Smg1/Gnl3/Atm/Xrcc1/Mcrs1/Ten1/Hnrnpc/Nabp2/Ruvbl2/Dkc1/Nat10/Ppp1r10/Tnks2/Nek7/Parn/Bmyc/Actr5/Stn1/Terf2ip/Tnks/Gnl3l/Terf2/Mre11a/Cct6a/Map3k4/Tfpt/Hdac8/Pot1a	39
GO:0045216	cell-cell junction organization	0.0148163	0.316017	4.10831e-08	2.54476e-07	Fscn1/Actb/Actg1/Perp/Gja1/Trpv4/Afdn/Jam3/Gja5/Cxadr/Xirp2/Pmp22/Epha4/Bmp6/Ramp2/Hipk1/Adam10/Prkca/Flcn/Ext1/Tbx5/Cav1/Pkp4/Whrn/Rhoc/Ace/Csf1r/Csk/Wnt11/Efnb2/Abi2/Slc39a9/Numb/Cdh22/Tgfb1/Cldn15/Heg1/Cdh11/Irx3/Cdc42/Flna/Shroom2/Tgfb2/Smad7/Tgfb3/Lims1/Lims2/Snai2/Ctnna1/Fbf1/Micall2/Gjc1/Agt/Fkrp/Myo1c/Ace2/Wdr1/Pkn2/Smad3/Cdh2/Pecam1/Epb41l3/Itgb1/Rock2/Tjp1/Prkaca/Vcl/Cd9/Rhoa/Pkp2/Plekh…	73
GO:1901617	organic hydroxy compound biosynthetic process	0.0156282	0.310484	4.11914e-08	2.54639e-07	Pth1r/Cyp2d22/Akr1c14/Errfi1/Sphk1/Itpkb/Ces1d/Dab2/Hmgcs2/Wnt5a/Pltp/Myh9/Bmp6/Erlin2/Stard4/Ppip5k1/Hsd17b10/Appl1/Sod1/Fgf2/Acer2/Cyp27a1/Plcg2/Plcd1/Erlin1/Cyp51/Apoe/Lss/Creb1/P2ry1/Nr1d1/Sc5d/Sptlc2/Got1/Asah2/Rest/Hmgcs1/Ptk2b/Amacr/Dhcr7/Zeb2/Per2/Sphk2/Dhfr/Ip6k1/Adcyap1r1/Aldh2/Tgfb2/Fdft1/Snai2/Sirt1/Prkaa2/Cyb5r1/Ip6k2/Abcg1/Ip6k3/Itpkc/Pts/Asah1/Epas1/Srebf1/Hmgcr/Abcd3/Insig2/Akr1b1…	77
GO:0006906	vesicle fusion	0.00953927	0.373016	4.29481e-08	2.64447e-07	Doc2b/Tom1/Sphk1/Vps11/Coro1a/Dysf/Erc1/Vamp8/Samd9l/Rab7/Pla2g5/Vav3/Uvrag/Septin8/Rab20/Tbc1d4/Grik5/Cav2/Fer1l5/Chmp6/Cplx2/Rab3a/C2cd5/Chmp4b/Yipf7/Chmp2a/Pla2g4a/Rab8b/Stxbp1/Vamp3/Snap47/Rab34/Chmp1b2/AU040320/Chmp1b/Snap29/Stx8/Snap23/Ankrd27/Sec22b/Yipf4/Eea1/Syt3/Syt11/Syt7/Pip4k2b/Chmp5	47
GO:0048145	regulation of fibroblast proliferation	0.00953927	0.373016	4.29481e-08	2.64447e-07	Cdkn1a/Cd74/Trp53inp1/Ddr2/Sphk1/Fbln1/Fn1/Wnt5a/Anxa2/Cd248/Lzts2/Dach1/Cav1/Trp53/Creb1/Fosl2/Med25/Myc/Aqp1/Sfrp1/Tgfb1/Cdk4/Zmpste24/Cdk6/Lig4/Fbrs/Fth1/Agt/Igf1/Bmyc/Rasa1/Inca1/Brpf1/Parp10/Rnaseh2b/B4galt7/Gas6/Jun/Nras/Dhx9/Ndufs4/Pdgfd/Egfr/Nf1/Sod2/Emd/Dab2ip	47
GO:0010633	negative regulation of epithelial cell migration	0.00669779	0.44	4.48075e-08	2.75352e-07	Adamts9/Meox2/Serpinf1/Vash1/Pfn2/Patz1/Rgcc/Fgf2/Dll4/Synj2bp/Apoe/Cd63/Thbs1/Mecp2/Tgfb1/Dusp10/Spred1/Slit2/Stard13/Mef2c/Angpt2/Evl/Csnk2b/Coro1c/Stc1/Dcn/Rhoa/Sema3a/Tgfbr3/Krit1/Mmrn2/Gadd45a/Dab2ip	33
GO:0006493	protein O-linked glycosylation	0.00710371	0.426829	4.54347e-08	2.78655e-07	Galnt15/Tmtc2/B3galnt2/Tmtc1/Tmtc4/Gxylt2/Poglut3/Tet1/Galnt11/Fktn/Pomk/Pomt1/Xxylt1/Trak2/Galnt7/C1galt1c1/Galnt10/Dpm1/Ogt/Tmtc3/Poglut2/B3galt6/Il15/Galnt4/St8sia6/Large1/Galnt16/Rxylt1/Pofut1/Fkrp/Poglut1/St6galnac2/A4galt/Pomgnt2/Pomt2	35
GO:0050730	regulation of peptidyl-tyrosine phosphorylation	0.01644	0.304511	4.80384e-08	2.93784e-07	Cd74/Nrp1/Adam17/Errfi1/Ptpn11/Prmt2/Ptprc/Ighm/Ehd4/Ggnbp2/Epha4/Bmp6/Socs3/Fgfr3/Socs5/Il6ra/Prkca/Cav1/Cspg4/Plcg2/Trp53/Tspan9/Dok7/Ace/Csf1r/Thy1/Ghr/Hdac2/Plpp3/Prkcd/Cblb/Lyn/Reln/Abi2/Cav2/Sfrp1/Clcf1/Fbxw7/Dlg4/Tgfb1/Chmp6/Il15/Ptk2b/Tnk2/Dusp22/Itga5/Arrb2/Enpp2/Epha7/Mlst8/Angpt1/Rap2b/Rap2c/Vtn/Agt/Ptpn6/Irf1/Efna1/Fyn/Igf1/Nedd9/Dmtn/Thbs4/Rasa1/Cd24a/Pdcl3/Lrp4/Lrrk1/Pecam1/Acvr1/Pr…	81
GO:0048661	positive regulation of smooth muscle cell proliferation	0.00893038	0.382609	4.81108e-08	2.93784e-07	Ddr2/Egr1/Hmox1/Flt1/Bmp4/Igfbp5/Nampt/Calcrl/Bmpr1a/Il6ra/Prkca/Nqo2/Fgf2/Mmp2/Tgfbr2/Foxj2/Myc/Thbs1/Dnmt1/Camk2d/Tgfb1/Igf1r/Akt1/Traf6/Zfp143/Ldlrap1/Fgf9/Mdm2/Ptk2/Agt/Cx3cl1/Igf1/Hpgd/Ppargc1a/Hmgcr/C3ar1/Akr1b1/P2ry6/Jun/Irak1/Pdgfd/Egfr/Nf1/Tgm2	44
GO:0035296	regulation of tube diameter	0.0125837	0.333333	4.8374e-08	2.93784e-07	Ptgs1/Apln/Adrb1/Itga1/Kdr/Snta1/Acta2/Mkks/Gja1/Gja5/Add3/Adora2a/Alox5/Ext1/Cav1/Mgll/Sod1/Nppb/Apoe/Ace/P2ry1/Ece1/Gclm/Mmp2/Adcy6/Sod3/Cd38/Pde5a/Scpep1/Nppa/Akt1/Map2k1/Per2/Zdhhc21/Ednrb/Atg5/Vstm4/Ptk2/Sirt1/Irag1/Gclc/Agt/Cx3cl1/Dock4/Grip2/Kcnj8/Wdr35/Rap1gds1/Slc8a1/Adm/Manf/Hmgcr/Dock5/Rock2/Rhoa/Egfr/Plekha7/Ext2/Tgfbr3/Sod2/Gpx1/Atp2b1	62
GO:0071383	cellular response to steroid hormone stimulus	0.0125837	0.333333	4.8374e-08	2.93784e-07	Fam107a/Eif4ebp1/Heyl/Akr1c14/Trim63/Ddrgk1/Fkbp4/Dab2/Prmt2/Nr3c1/Vps11/Klf9/Bmal1/Bmp4/Ddit4/Per1/Uri1/Bdnf/Kdm3a/Cry2/Calr/Tcf21/Calcoco1/Eif4e/Crebrf/Zfp36/Tfap4/Dnaja1/Aqp1/Fbxo32/Wbp2/Nr3c2/Parp1/Rest/Sfrp1/Trerf1/Tgfb1/Esrrb/Yap1/Daxx/Safb/Ddx17/Atp1a1/Ywhah/Sirt1/Safb2/Igf1/Carm1/Zfp36l2/Kdm5d/Ube2l3/Abhd2/Cry1/Cnot9/Kdm4c/Rhoa/Strn3/Zfp764/Med1/Ufsp2/Ar/Hdac1	62
GO:0097746	blood vessel diameter maintenance	0.0125837	0.333333	4.8374e-08	2.93784e-07	Ptgs1/Apln/Adrb1/Itga1/Kdr/Snta1/Acta2/Mkks/Gja1/Gja5/Add3/Adora2a/Alox5/Ext1/Cav1/Mgll/Sod1/Nppb/Apoe/Ace/P2ry1/Ece1/Gclm/Mmp2/Adcy6/Sod3/Cd38/Pde5a/Scpep1/Nppa/Akt1/Map2k1/Per2/Zdhhc21/Ednrb/Atg5/Vstm4/Ptk2/Sirt1/Irag1/Gclc/Agt/Cx3cl1/Dock4/Grip2/Kcnj8/Wdr35/Rap1gds1/Slc8a1/Adm/Manf/Hmgcr/Dock5/Rock2/Rhoa/Egfr/Plekha7/Ext2/Tgfbr3/Sod2/Gpx1/Atp2b1	62
GO:0006364	rRNA processing	0.0140045	0.32093	4.84904e-08	2.93917e-07	Mettl16/Sbds/Sart1/Las1l/Eri1/Riok3/Trmt2b/Rps27rt/Nop53/Tfb1m/Ngdn/Rpp25/Wdr43/Chd7/Suv39h1/Exosc5/Ddx56/Nsun4/Nop14/Lsm6/Utp3/Eif6/Rrs1/Dkc1/Abt1/Nat10/Npm3/Ddx17/Dimt1/Tsr3/Gtpbp4/Pop7/Nvl/Ddx27/Nob1/Dhx37/Sirt7/Utp20/Emg1/Mrm1/Slx9/Utp6/Rsl1d1/Rpl10a/Mrm2/Rrp12/Rexo4/Utp23/Nhp2/Wdr46/Krr1/Srfbp1/Exosc2/Mettl18/Rps28/Rnasel/Rpl7l1/Rps25/Ddx49/Mettl15/Tsr2/Zcchc4/Utp4/Lyar/Wdr12/Pelp1/Znhit6/Ex…	69
GO:0006402	mRNA catabolic process	0.0156282	0.309237	4.97608e-08	3.01031e-07	Tent5b/Cirbp/Csdc2/Tent5a/Vim/Ncbp2/Mettl16/Tnrc6a/Caprin1/Nudt12/Nudt16/Brf1/Skic2/Supv3l1/Ago4/Tob1/Dcp2/Zfp36/Pan2/Skic3/Rida/Pnpt1/Dhx36/Exosc5/Smg1/Atm/Pcbp4/Ybx2/Lsm6/Hnrnpc/Mettl3/Fxr2/Fastkd1/Pym1/Larp4b/Tnrc6c/Hnrnpr/Fastkd2/Parn/Edc4/Pnrc1/Pabpc4/Ago3/Zfp36l2/Plekhn1/Noct/Nrde2/Igf2bp2/Lsm2/Mettl14/Samd4/Edc3/Tirap/Nbas/Eif3e/Srsf1/Exosc2/Upf3b/Rock2/Fxr1/Rnasel/Gspt1/Eif4enif1/Cnot9/Rn…	77
GO:0006941	striated muscle contraction	0.0121778	0.337079	5.01654e-08	3.02889e-07	Myh7/Ccn2/Lmod3/Adrb1/Snta1/Myh14/Ppp1r13l/Tmem38b/Tnni2/Zfas1/Trpv4/Scn4b/Pde4b/Cacnb2/Synm/Bin1/Gja5/Dsc2/Cacna1s/Actc1/Casq1/Cav1/Map2k6/Smtn/Kcnh2/Sgcd/Ank2/Tnnt2/Gpd1l/Camk2d/Chrnb1/Abcc9/Pde5a/Hcn4/Csrp3/Akap6/Uty/Map2k3/Casq2/Nppa/Flna/Smad7/Atp8a2/Kbtbd13/Kcnj2/Large1/Strit1/Atp1a1/Cav3/Rnf207/Scn4a/Rem1/Ctnna3/Kcnj8/Ace2/Slc8a1/Srsf1/Dmd/Stc1/Pkp2	60
GO:0031023	microtubule organizing center organization	0.0107571	0.353333	5.11735e-08	3.08377e-07	Tuba1a/Chordc1/Clasp1/Xpo1/Dync1li1/Spice1/Odf2/Wdr62/Sdccag8/Crocc/Ccnl2/Xrcc2/Bnip2/Cntln/Uvrag/Cenpj/C2cd3/Cntrob/Clasp2/Xrcc3/Cep131/Plk2/Ssx2ip/Golga2/Azin1/Dctn1/Nat10/Chmp4b/Sirt1/Chmp2a/Ranbp1/Atf5/Haus3/Chd3/Mapk8/Nin/Chmp1b/Pard6b/Mark4/Mdm1/Nubp1/Rock2/Arl2/Cetn2/Cdk5rap2/Brca2/Kif3a/Cep192/Cenatac/Gadd45a/Chmp5/Usp33/Pard6a	53
GO:0010657	muscle cell apoptotic process	0.00913335	0.378151	5.13557e-08	3.08876e-07	Rps6ka2/Pik3r1/Igfbp3/Bnip3/Fndc1/Hmox1/Zfas1/Dipk2a/Gata6/Atf4/Bag3/Cav1/Cflar/Capn1/Tigar/Trp53/Fbxo32/Dnmt1/Camk2d/Bcl2/Ptk2b/Igf1r/Slc25a4/Arrb2/Trip10/Rapgef3/Ppp1r10/Atg5/Sirt1/Sirt4/Acot1/Naca/Agt/Igf1/Slc7a5/Camk2a/Pdpk1/Hmgcr/Mapk8/Arrb1/Pde1a/Gnb1/Sod2/Dynlt1b/Gapdh	45
GO:0032963	collagen metabolic process	0.00933631	0.373984	5.43155e-08	3.26047e-07	Serpinh1/Col1a1/Ccn2/Retreg1/Col1a2/Col5a1/Ddr2/Emilin1/Rcn3/Scx/Vim/Mrc2/Ctsl/Ltbp1/Errfi1/Fn1/Mmp3/Bmp4/Cygb/Fgfr3/Il6ra/Rgcc/P3h3/Mmp15/Tns2/Tnxb/Fosl2/Mmp2/Mmp14/Prkcd/Adamts3/Got1/Tgfb1/Creb3l1/Arrb2/Adamts2/Tgfb3/Rapgef3/Mmp28/Pepd/Ctsb/Naglu/Mmp23/Vsir/Itgb1/Tgfbr3	46
GO:0016239	positive regulation of macroautophagy	0.00690075	0.43038	5.49788e-08	3.29393e-07	Sesn1/Bnip3/Kdr/Tom1/Sesn3/Hmox1/Irgm1/Bag3/Optn/Wdr45/Supt5/Sptlc2/Gpsm1/Tsc1/Rnf31/Epm2a/Slc25a4/Trim13/C9orf72/Scoc/Ulk1/Prkn/Sirt1/Sting1/Clec16a/Tlr2/Pink1/Snx18/Lrsam1/Ralb/Tbk1/Dcn/Rufy4/Pip4k2b	34
GO:1904262	negative regulation of TORC1 signaling	0.00446519	0.55	5.70078e-08	3.40893e-07	Sesn1/Sesn3/Rnf152/Ube2n/Castor1/Tsc1/Atm/Nlk/Ywhaz/Ube2d1/Rnf167/Spaar/Kptn/Prkaa2/Stk11/Prkaa1/Prkaca/Akt1s1/Itfg2/Tbk1/Ube2w/Depdc5	22
GO:0051651	maintenance of location in cell	0.0156282	0.308	6.00063e-08	3.58134e-07	Tmsb4x/Tmsb10/Alb/Selenon/Tmem38b/Gja1/Twf2/Ptprc/Kdelr3/Tnrc6a/Ibtk/Coro1a/Gp1ba/Ngf/Os9/Cacna1s/Casq1/Cav1/Fgf2/Plcg2/Plcd1/Apoe/Uvrag/Thy1/Adcy6/Kdelr2/Ank2/Chd7/Plcb4/Grik5/Lyn/Myzap/Camk2d/Akap6/Tgfb1/Arhgap21/Ptk2b/Itgav/Plce1/Casq2/Akt1/Flna/Srgn/Fth1/Tgfb2/Dbn1/Mtln/Hexb/Plcb3/Atg5/Hrc/Itpr3/Sirt1/Slc17a7/Cx3cl1/Fkrp/Ptpn6/Pfn4/Asph/Naglu/Ero1a/Slc8a1/Pink1/Insig2/Supt7l/Fkbp1a/P2ry6/Itpr…	77
GO:0035150	regulation of tube size	0.0125837	0.331551	6.04171e-08	3.59207e-07	Ptgs1/Apln/Adrb1/Itga1/Kdr/Snta1/Acta2/Mkks/Gja1/Gja5/Add3/Adora2a/Alox5/Ext1/Cav1/Mgll/Sod1/Nppb/Apoe/Ace/P2ry1/Ece1/Gclm/Mmp2/Adcy6/Sod3/Cd38/Pde5a/Scpep1/Nppa/Akt1/Map2k1/Per2/Zdhhc21/Ednrb/Atg5/Vstm4/Ptk2/Sirt1/Irag1/Gclc/Agt/Cx3cl1/Dock4/Grip2/Kcnj8/Wdr35/Rap1gds1/Slc8a1/Adm/Manf/Hmgcr/Dock5/Rock2/Rhoa/Egfr/Plekha7/Ext2/Tgfbr3/Sod2/Gpx1/Atp2b1	62
GO:0043484	regulation of RNA splicing	0.0125837	0.331551	6.04171e-08	3.59207e-07	Cirbp/Pik3r1/Rbm3/Srsf5/Hnrnpa2b1/Hnrnph1/Ccnl2/Zpr1/Prpf19/Larp7/Ptbp2/Tada3/Tra2a/Sf1/Ahnak/Rbfox1/Nsrp1/Rest/Hnrnpll/Pcbp4/Zfp638/Polr2a/Srsf9/Dyrk1a/Khdrbs1/Srrm4/Fxr2/Sf3b3/Srsf6/Srsf7/Ddx17/Dazap1/Obi1/Hnrnpl/Tia1/Srrm1/Rbmxl1/Setx/Mettl4/Zfp326/Tada2b/Rbm7/Clk4/Supt7l/Snw1/Sfswap/Snrnp70/Srsf1/C1qbp/Fxr1/Mbnl1/Clk1/Smn1/Sap18b/Rnps1/Atxn7/Ythdc1/Malat1/Nova1/Clk2/Thrap3/Fam50a	62
GO:0000082	G1/S transition of mitotic cell cycle	0.0148163	0.313305	6.08001e-08	3.60107e-07	Cdkn1a/Fam107a/Eif4ebp1/Ccnd1/Fbxo31/Actb/Ddr2/Ccnd2/Adam17/Nacc2/Hacd1/Prmt2/Ctdsp2/Rgcc/Appl1/Fhl1/Trp53/Zpr1/Eif4e/Gpnmb/Cenpj/Larp7/Myc/Cul4b/Fbxo7/Smarcb1/E2f6/Bcl7c/Camk2d/Cdk17/Bcl2/Plk2/Bcl7b/Esrrb/Rpa2/Cdk4/Rhou/Ccnh/Akt1/Rbbp8/Crlf3/Cdk6/Cdkn2d/Usp37/Mdm2/Appl2/Dact1/Pias1/Ptpn6/Crebbp/Rfwd3/Pole/Bmyc/Pbrm1/Rbl2/Pdpn/Camk2a/Acvr1/Itgb1/Brd7/Arid1b/Brd4/Casp2/E2f4/Rps27l/Egfr/Ppp2ca/Rrm1…	73
GO:0002221	pattern recognition receptor signaling pathway	0.0148163	0.313305	6.08001e-08	3.60107e-07	Pik3r1/Irf7/Ninj1/Ddx60/Gbp2/Tspan6/Hspd1/Colec12/Tnip2/Irgm1/Nfkbia/Riok3/Irak3/Cav1/Appl1/Lacc1/Ptprs/Plcg2/Znrf1/Nop53/Ifi35/Gps2/Nr1d1/Mapkapk3/Unc93b1/Lyn/Nploc4/Trim3/Chuk/Lbp/Alpk1/Ap3b1/Rftn1/Tlr3/Slc15a3/Arrb2/Traf6/Atat1/Traf3/Otulin/Oas1b/Tril/Sirt2/Ipo5/Appl2/Nek7/Sting1/Hcfc2/Kcnj8/Irf1/Naglu/Trim25/Gpatch3/Tlr2/Brcc3/Tnfaip3/Pdpk1/Rnf125/Lsm14a/Mapk8/Nr1h3/Tirap/Mark4/C1qbp/Erbin/Ir…	73
GO:0010927	cellular component assembly involved in morphogenesis	0.0099452	0.362963	6.12725e-08	3.62215e-07	Myh7/Lmod3/Actg1/Myom2/Clasp1/Xirp1/Ankrd23/Synpo2l/Pmp22/Acta1/Actc1/Casq1/Cflar/Tppp/Lmod2/Fig4/Tbc1d20/Pgm5/Hdac2/Myoz2/Nrap/Tnnt2/Clasp2/Csrp3/Tmod3/Casq2/Mios/Mef2c/Csrp2/Cav3/Myh10/Nebl/Tmod4/Phldb2/Nectin2/Pfn4/Csrp1/Mtmr2/Tlr2/Wdr1/AU040320/Tbpl1/Epb41l3/Actn2/Itgb1/Sec23ip/Cd9/Ldb3/Neb	49
GO:0043281	regulation of cysteine-type endopeptidase activity involved in apoptotic process	0.0138015	0.320755	6.18567e-08	3.64975e-07	Ccn2/Xdh/Herpud1/Ret/Ppm1f/Fas/Ngf/Adora2a/Dpep1/Hspd1/Casp8/Dap/Xiap/Cflar/Acer2/Pdcd5/Myc/Tfap4/Aqp1/Thbs1/Dnaja3/Sox7/Rest/Bok/Mical1/Sfn/Akt1/Arrb2/Cycs/Bak1/Epha7/Cdkn2d/Uaca/Mdm2/Stat1/Sirt1/Col4a3/Hip1r/Pdcd6/Igf1/Sh3rf1/Wdr35/Dnajb6/Fis1/Bmyc/Mrtfa/Rps6ka1/Bcl2l11/Mapk9/Tnfsf10/Fam162a/Ift57/Hip1/Smad3/Gpi1/Card9/Arl6ip5/Arrb1/Gas6/Mul1/Mtch1/Triap1/Casp2/Rps27l/Rhoa/Rnf7/Gpx1/Ctsd	68
GO:0055017	cardiac muscle tissue growth	0.00893038	0.37931	6.47772e-08	3.80857e-07	Pi16/Col14a1/Adrb1/Ccnd2/Gja1/Rgs4/Nr3c1/Dipk2a/Cxadr/Bmpr1a/Kcnk2/Gata6/Cited2/Tbx5/Fgf2/Jarid2/Tgfbr2/Hdac2/Camk2d/Akap6/Heg1/Slc25a4/Yap1/Fgf9/Mapk11/Mef2c/Trip10/Tgfb2/Ctdp1/Vgll4/Cav3/Myh10/Sirt1/Agt/Igf1/Mapk14/Pim1/Ccm2l/Sorbs2/Tbx2/Zfpm2/Smad1/Tgfbr3/Tbx20	44
GO:0006898	receptor-mediated endocytosis	0.016643	0.301471	6.47933e-08	3.80857e-07	Tfrc/Apln/Ston2/Clu/Lmbr1l/Rin3/Cxcl16/Dab2/Anxa2/Grk3/Arhgap27/Ramp2/Calcrl/Prkca/Tbc1d5/Pla2r1/Cav1/Plcg2/Synj2bp/Rab21/Hspg2/Picalm/Apoe/Efnb2/Tgfbr2/Cd63/Cd2ap/Cap1/Dnm3/Cltb/Lpar1/Insr/Cav2/Dtnbp1/Numb/Ston1/Dlg4/Itgav/Tnk2/Plk2/Dll1/Arrb2/Ldlrap1/Fchsd2/Rab31/Angpt1/Gsg1l/Ulk1/Snx9/Sirt2/Cav3/Itsn1/Vtn/Hip1r/Snap91/Grb2/Cltc/Mtmr2/Mrc1/Dnm1/Ldlr/Adm/Ankrd13b/Hip1/Rala/AU040320/Rnf216/Ache/N…	82
GO:0034620	cellular response to unfolded protein	0.00710371	0.421687	6.57149e-08	3.85545e-07	Pik3r1/Ppp1r15a/Ccnd1/Herpud1/Tmtc4/Ddrgk1/Pmp22/Hspd1/Os9/Ermp1/Cdk5rap3/Atf4/Bag3/Optn/Crebrf/Nck1/Abca7/Pdia6/Tmem33/Bok/Creb3l1/Daxx/Bak1/Rhbdd1/Abcb10/Nck2/Pigbos1/Ero1a/Creb3/Xbp1/Cops5/Erlec1/Selenos/Atf6b/Ddit3	35
GO:1904705	regulation of vascular associated smooth muscle cell proliferation	0.00669779	0.434211	6.62598e-08	3.8801e-07	Cdkn1a/Apln/Ddr2/Hmox1/Igfbp5/Calcrl/Bmpr1a/Timp3/Nqo2/Cav1/Fgf2/Mmp2/Foxj2/Efemp2/Dnmt1/Camk2d/S1pr2/Ldlrap1/Fgf9/Mef2c/Tgfb3/Ndrg2/Mdm2/Agt/Igf1/Hpgd/Ppargc1a/P2ry6/Jun/Rhoa/Gstp2/Nf1/Sod2	33
GO:0030512	negative regulation of transforming growth factor beta receptor signaling pathway	0.0077126	0.404255	7.10319e-08	4.15173e-07	Emilin1/Adam17/Pbld1/Ltbp1/Peg10/Fbn1/Adamtsl2/Tet1/Htra1/Brms1l/Spred2/Smurf2/Aspn/Trp53/Nrros/Cidea/Hdac2/Ogt/Bcl9l/Cav2/Ing1/Rasl11b/Skil/Spred1/Prdm16/Wfikkn2/Smad7/Tgfb3/Pmepa1/Ldlrad4/Bambi/Sirt1/Sap30/Xbp1/Brms1/Htra3/Tgfbr3/Hdac1	38
GO:0051646	mitochondrion localization	0.00548001	0.482143	7.22563e-08	4.21537e-07	Alb/Lrrk2/Armcx3/Tspan4/Sybu/Dynll1/Ubb/Map1b/Synj2bp/Trak2/Tspan9/Atcay/Ogt/Uchl1/Opa1/Armc1/Prkn/Nectin2/Map6/Trak1/Dnm1l/Mul1/Plin5/Mapt/Msto1/Mark1/Rhot1	27
GO:0051261	protein depolymerization	0.00953927	0.367188	7.52139e-08	4.37969e-07	Nes/Ccn2/Lmod3/Spta1/Trim54/Clasp1/Twf2/Trpv4/Dysf/Add3/Carmil1/Map1b/Nav3/Lmod2/Nedd1/Mical3/Eps8/Cfl1/Mtpn/Capza1/Clasp2/Swap70/Mical1/Apc2/Tmod3/Stmn2/Ttbk2/Shroom2/Evl/Nckap5/Sema5a/Tmod4/Capzb/Asph/Taok1/Stmn1/Dmtn/Wdr1/Mical2/Sptb/Actn2/Gas2l1/Smn1/Atxn7/Rhoa/Sptan1/Gak	47
GO:0010660	regulation of muscle cell apoptotic process	0.00852446	0.385321	7.60861e-08	4.4222e-07	Pik3r1/Igfbp3/Bnip3/Fndc1/Hmox1/Zfas1/Dipk2a/Gata6/Atf4/Bag3/Cav1/Cflar/Capn1/Tigar/Trp53/Fbxo32/Dnmt1/Camk2d/Bcl2/Ptk2b/Igf1r/Slc25a4/Arrb2/Trip10/Rapgef3/Ppp1r10/Atg5/Sirt1/Sirt4/Acot1/Naca/Agt/Igf1/Slc7a5/Camk2a/Pdpk1/Hmgcr/Mapk8/Arrb1/Pde1a/Sod2/Gapdh	42
GO:0030239	myofibril assembly	0.00649482	0.438356	7.94949e-08	4.6117e-07	Myh7/Lmod3/Actg1/Myom2/Xirp1/Ankrd23/Synpo2l/Acta1/Actc1/Casq1/Cflar/Lmod2/Pgm5/Hdac2/Myoz2/Nrap/Tnnt2/Csrp3/Tmod3/Casq2/Mef2c/Csrp2/Cav3/Myh10/Nebl/Tmod4/Csrp1/Wdr1/Actn2/Itgb1/Ldb3/Neb	32
GO:1904951	positive regulation of establishment of protein localization	0.0207023	0.281768	8.07021e-08	4.67302e-07	Doc2b/Pik3r1/Glul/Myrip/Ankrd1/Gja1/Myh9/Adora2a/Vamp8/Sybu/Dynll1/Tmem132a/Oxct1/Wipf1/Bag3/Kcnb1/Vegfc/Zpr1/Crebrf/Pdcd5/Cenpj/Coro2b/Cd2ap/Sar1a/Ptp4a3/Prkcd/Rapgef4/Irs2/Smo/Camk2n1/Cd38/Fbxw7/Pcnt/Wls/Tgfb1/Cep131/Oaz2/Sfn/Mcu/Tek/Tm9sf4/Cdc42/Flna/Rph3al/Hspa1l/Tcaf1/Stom/Tcaf2/Dkc1/Tgfb2/Tgfb3/Uaca/Rapgef3/C2cd5/Mdm2/Ppid/Ipo5/Blk/Myh10/Prkn/Sirt1/Abcg1/Fyn/Igf1/Erbb2/Asph/Camk1/Myo1c/Fis1…	102
GO:0044282	small molecule catabolic process	0.0202963	0.283286	8.0863e-08	4.67363e-07	Cdo1/Xdh/Ahcy/Prodh/Adh1/Etfbkmt/Ddo/Fah/Aldh1l1/Akr1c14/Aldob/Galm/Nos2/Ces1d/Decr2/Aldh1l2/Pfkl/Cyp26b1/Gnpda2/Dpep1/Ahcyl/Acsl5/Hibch/Dcxr/Echdc1/Pon3/Oxct1/Hsd17b10/Nqo2/Cpt2/Cyp27a1/Tigar/Asrgl1/Khk/Acad11/Trp53/Nudt5/Dpyd/Apoe/Amdhd2/Cdadc1/Aig1/Gda/Irs2/Got1/Echdc2/Blmh/Bckdha/Adal/Hsd17b4/Glb1/Sdsl/Akt1/Acox1/Galt/Slc25a12/Arsb/Mtln/Nudt1/Hexb/Glo1/Eno3/Lipe/Ids/Mtrr/Lpin2/Entpd4b/Pgk1/En…	100
GO:0006631	fatty acid metabolic process	0.0251674	0.267819	8.27942e-08	4.77637e-07	Fmo2/Cd74/Cyp1b1/Ptgs1/Cyp2d22/Etfbkmt/Akr1c14/Ptgds/Hacd1/Fabp5/Sphk1/Ces1d/Decr2/Sco1/Aasdh/Ankrd23/Acaca/Aldh1l2/Ptgr2/Hacd4/Cygb/Peds1/Acsl5/Erlin2/Alox5/Echdc1/Acbd4/Adipor2/Hsd17b10/Pla2g5/C1qtnf2/Cav1/Mmut/Cpt2/Mgll/Acad11/Degs1/Erlin1/Tnxb/Them4/Aig1/Irs2/Echdc2/Lpl/Asah2/Hsd17b4/Scd4/Slc45a3/Ankrd26/Fabp4/Sgpl1/Akt1/Prkab2/Gpam/Acox1/Pdk2/Per2/Plp1/Gk/Eif6/Ptgis/Acot11/Dgat2/Mtln/Fmo1/Si…	124
GO:0009266	response to temperature stimulus	0.0113659	0.341463	8.37857e-08	4.8157e-07	Cirbp/Trp53inp1/Rbm3/Adrb1/Chordc1/Aldh18a1/Tcim/Hmox1/Ces1d/Trpv4/Cxcl12/Pmp22/Ephb1/Bag3/Casq1/Sod1/Myof/Hikeshi/Xylt1/Cidea/Zfp976/Psip1/Dnaja1/Eif2b3/Dhx36/Trpv2/Dnaja3/Eif2b5/Akt1/Arrb2/Daxx/Hsbp1l1/Acot11/Metrnl/Appl2/Gclc/Pdcd6/Lipe/Agt/Igf1/Eif2b2/Eif2b1/Lrp11/Pdcl3/Slc27a1/Prkaa1/Irak1/Hspb2/Dhx9/Prkaca/Tmem135/Thra/Nfe2l1/Mapt/Nf1/Eif2b4	56
GO:0016570	histone modification	0.0113659	0.341463	8.37857e-08	4.8157e-07	H1f2/Hdac9/Gata2/Hr/Crtc2/Kdm3a/Morf4l1/Ube2n/Kmt2b/Nfya/Brd8dc/Yeats2/Ehmt2/Ezh1/Hdac2/Ogt/Rbbp5/Mecp2/Setd7/Suv39h1/Leo1/Tgfb1/Uty/Smarca5/Setd1b/Mcrs1/Ruvbl2/Setd1a/Kansl3/Sirt1/Kat14/Sirt4/Baz1b/Msl3/Rnf40/Crebbp/Sirt7/Smyd5/Ctr9/Myo1c/Nelfe/Pcgf3/Auts2/Xbp1/Msl1/Kat8/Paf1/Ube2a/Dmap1/Smyd1/Wdr5b/Hdac8/Jmjd1c/Phf20/Mrgbp/Hdac1	56
GO:0010332	response to gamma radiation	0.00507408	0.5	8.85239e-08	5.07865e-07	Cdkn1a/Bcl2l1/Egr1/Ptprc/Tigar/Trp53/Xrcc2/Myc/Bcl2/Atm/Zmpste24/Yap1/Bak1/Lig4/Mdm2/Xrcc6/Bmyc/Wrn/Elk1/Map3k20/Prkaa1/Tlk2/Brca2/Sod2/Gpx1	25
GO:0060419	heart growth	0.00933631	0.368	9.53965e-08	5.45289e-07	Pi16/Col14a1/Adrb1/Ccnd2/Gja1/Dusp6/Rgs4/Nr3c1/Dipk2a/Cxadr/Bmpr1a/Kcnk2/Gata6/Cited2/Tbx5/Fgf2/Jarid2/Tgfbr2/Hdac2/Camk2d/Akap6/Heg1/Slc25a4/Yap1/Fgf9/Mapk11/Mef2c/Trip10/Tgfb2/Ctdp1/Vgll4/Cav3/Myh10/Sirt1/Agt/Igf1/Acacb/Mapk14/Pim1/Ccm2l/Sorbs2/Tbx2/Zfpm2/Smad1/Tgfbr3/Tbx20	46
GO:0006479	protein methylation	0.00832149	0.386792	9.55733e-08	5.45289e-07	H1f2/Etfbkmt/Mtr/Prmt2/Kmt2b/N6amt1/Hemk1/Eef1akmt1/Ehmt2/Ezh1/Ogt/Atpsckmt/Rbbp5/Mecp2/Setd7/Suv39h1/Smarca5/Setd1b/Prmt9/Mcrs1/Setd1a/Rab3d/Kansl3/Prmt1/Smyd5/Carm1/Kmt5a/Nelfe/Auts2/Xbp1/Eef1akmt2/Kat8/Ndufaf7/Smyd1/Wdr5b/Prmt3/Mettl18/Gspt1/Ntmt1/Phf20/Fam98b	41
GO:0008213	protein alkylation	0.00832149	0.386792	9.55733e-08	5.45289e-07	H1f2/Etfbkmt/Mtr/Prmt2/Kmt2b/N6amt1/Hemk1/Eef1akmt1/Ehmt2/Ezh1/Ogt/Atpsckmt/Rbbp5/Mecp2/Setd7/Suv39h1/Smarca5/Setd1b/Prmt9/Mcrs1/Setd1a/Rab3d/Kansl3/Prmt1/Smyd5/Carm1/Kmt5a/Nelfe/Auts2/Xbp1/Eef1akmt2/Kat8/Ndufaf7/Smyd1/Wdr5b/Prmt3/Mettl18/Gspt1/Ntmt1/Phf20/Fam98b	41
GO:0071692	protein localization to extracellular region	0.0241526	0.269841	9.66209e-08	5.50256e-07	Doc2b/Glul/Pim3/Rcn3/Myrip/Ankrd1/Ltbp1/Nos2/Stxbp4/Ptpn11/Gja1/Ptprn/Fbn1/Steap3/Myh9/Midn/Bmal1/Pfkl/Gja5/Adora2a/Tbc1d1/Vamp8/Sybu/Dynll1/Alox5/Tmem132a/Oxct1/Cd200/Kcnj11/Cyb5r4/Kcnb1/Mia2/Vegfc/Cyp51/Nrros/Apoe/Nr1d1/Gsdmd/Cd2ap/Tvp23b/Rapgef4/Irs2/Llgl2/Abca1/Rest/Sfrp1/Camk2n1/Cd38/Pde3b/Wls/Rhbdf1/Tcirg1/Tgfb1/Mcu/Abca12/Slc4a8/Rph3al/Per2/Sidt2/Tgfb2/Tgfb3/Idh2/Ednrb/Rab3a/Rab3d/Tmem167/…	119
GO:1904035	regulation of epithelial cell apoptotic process	0.00953927	0.364341	9.88668e-08	5.62018e-07	Gata2/Akr1c14/Kdr/Hmox1/Foxo3/Bmp4/Ngf/Ramp2/Cd248/Tnip2/Pla2r1/Rgcc/Cflar/Col18a1/Wnt11/Zfp36/Myc/Thbs1/Agap2/Bok/Bcl2/Tgfb1/Igf1r/Tek/Arrb2/Yap1/Itgb3bp/Adar/Lims1/Sema5a/Angpt1/Srsf6/Ecscr/Prkaa2/Tia1/Igf1/Carm1/Ppargc1a/Pias4/Tnfaip3/Xbp1/Capn10/Gas6/Prkaa1/Tcf7l2/Krit1/Plcg1	47
GO:2001243	negative regulation of intrinsic apoptotic signaling pathway	0.00852446	0.381818	1.02881e-07	5.83771e-07	Bcl2l1/Cd74/Clu/Herpud1/Lrrk2/Cxcl12/Ybx3/Uri1/Ppif/Atf4/Hyou1/Grina/Hdac2/Dnaja1/Fbxo7/Bcl2/Creb3l1/Txndc12/Akt1/Map2k1/Cdkn2d/Opa1/Mdm2/Snai2/Prkn/Sirt1/Fyn/Bag5/Creb3/Pink1/Parl/Xbp1/Selenos/Pttg1ip/Mapk8ip1/G2e3/Triap1/Armc10/Ackr3/Sod2/Gpx1/Hdac1	42
GO:0007009	plasma membrane organization	0.0115689	0.337278	1.04507e-07	5.90841e-07	Baiap2/Plscr2/Col5a1/Clu/Whamm/Spta1/Ehd2/Ptprc/Anxa2/Myh9/Dysf/Bin1/Sh3tc2/S100a10/Colec12/Cav1/Sod1/Myof/Degs1/Plscr5/Abca7/Prkcd/Ank2/Ahnak/Cav2/Plscr1/Ndrg1/Csrp3/Fer1l5/Chmp6/Akt1/Pacsin3/Bin3/Tgfb2/Rab3a/Snx9/Large1/Cav3/Chmp4b/Tlcd2/Myh10/Ano4/Chmp2a/Casp7/Snx18/Epb41l3/Chmp1b/Sptb/Smpd1/Tie1/A4galt/Cd9/Syt11/Syt7/Fat4/Ar/Chmp5	57
GO:0010950	positive regulation of endopeptidase activity	0.0115689	0.337278	1.04507e-07	5.90841e-07	Ccn2/Xdh/Ret/Perp/Lgmn/Ppm1f/Epha4/Fas/Ngf/Hspd1/Casp8/Dap/Acer2/Picalm/Pdcd5/Myc/Tfap4/Lyn/Dnaja3/Sox7/Rest/Bok/Cycs/Bak1/Uaca/Prelid1/Stat1/Sirt1/Col4a3/Hip1r/Pdcd6/Efna1/Fyn/Wdr35/Asph/Fis1/Bmyc/Vsir/Bcl2l11/Mapk9/Tnfsf10/Fam162a/Ift57/Hip1/Smad3/Card9/Arl6ip5/Arrb1/Rock2/Mul1/Mtch1/Psenen/Casp2/Rps27l/Rhoa/Rnf7/Ctsd	57
GO:0050773	regulation of dendrite development	0.0103511	0.351724	1.07039e-07	6.04054e-07	Ptprf/Baiap2/Fbxo31/Rtn4ip1/Eef2k/Cux2/Kalrn/Marcks/Wnt5a/Afdn/Caprin1/Hecw2/Epha4/Rab21/Rap2a/Cyth2/Obsl1/Rapgef4/Dhx36/Reln/Tnik/Numb/Wls/Dlg4/Sdc2/Dbn1/Opa1/Crkl/Ywhah/Nsmf/Prex1/Ptprd/Carm1/Stk11/Cyfip1/Nfatc4/Dnm1l/Caprin2/Actr2/Camk1d/Ache/Fzd4/Ankrd27/Iqgap1/Bhlhb9/Rhoa/Actr3/Myo5b/Mark1/Camk2b/Dab2ip	51
GO:0048814	regulation of dendrite morphogenesis	0.00791557	0.393939	1.0972e-07	6.18067e-07	Ptprf/Baiap2/Fbxo31/Eef2k/Cux2/Kalrn/Marcks/Wnt5a/Afdn/Caprin1/Hecw2/Epha4/Rab21/Rap2a/Obsl1/Dhx36/Reln/Tnik/Numb/Wls/Dlg4/Sdc2/Dbn1/Opa1/Ywhah/Nsmf/Ptprd/Stk11/Nfatc4/Dnm1l/Caprin2/Actr2/Ache/Fzd4/Ankrd27/Bhlhb9/Actr3/Myo5b/Camk2b	39
GO:0032835	glomerulus development	0.0060889	0.447761	1.1261e-07	6.33196e-07	Heyl/Ret/Klf15/Egr1/Nid1/Enpep/Bmp4/Prom1/Sulf1/Il6ra/Ext1/Cflar/Myo1e/Cfh/Tcf21/Aqp1/Bcl2/Plce1/Asxl1/Tek/Mef2c/Angpt2/Ednrb/Angpt1/Gpr4/Col4a3/Cd24a/C3ar1/Sulf2/Pdgfd	30
GO:0031397	negative regulation of protein ubiquitination	0.00690075	0.419753	1.15331e-07	6.4616e-07	Wnk1/Sqstm1/Dysf/Cav1/Rasd2/Gps2/Ogt/Dnaja1/Akt1/Arrb2/Per2/Ubxn1/Smad7/Atg5/Gtpbp4/Gclc/Limk1/Mad2l2/Sirt7/Fyn/Mad2l1/Bag5/Tnfaip3/Klhl40/Parp10/Gnl3l/Arrb1/Prmt3/Cry1/Hdac8/Nxn/Sh3rf2/Prkcg/Spopl	34
GO:1990874	vascular associated smooth muscle cell proliferation	0.00690075	0.419753	1.15331e-07	6.4616e-07	Cdkn1a/Apln/Ddr2/Hmox1/Igfbp5/Calcrl/Bmpr1a/Timp3/Nqo2/Cav1/Fgf2/Mmp2/Foxj2/Efemp2/Dnmt1/Camk2d/S1pr2/Ldlrap1/Fgf9/Mef2c/Tgfb3/Ndrg2/Mdm2/Agt/Igf1/Hpgd/Ppargc1a/P2ry6/Jun/Ddit3/Rhoa/Gstp2/Nf1/Sod2	34
GO:0106027	neuron projection organization	0.00893038	0.372881	1.15633e-07	6.46689e-07	Baiap2/Eef2k/Cux2/Lgmn/Kalrn/Lrrk2/Marcks/Afdn/Caprin1/Epha4/Adam10/Ephb1/Apoe/Dhx36/Cfl1/Reln/Dnm3/Insr/Abi2/Dtnbp1/Ppp1r9a/Dlg4/Igf1r/Cdc42/Dctn1/Dbn1/Opa1/Abi3bp/Tanc1/Efna1/Fyn/Mtmr2/Nedd9/Dnm1l/Caprin2/Actr2/Prnp/Prmt3/Arhgap44/Bhlhb9/Actr3/Myo5b/Tanc2/Camk2b	44
GO:0002244	hematopoietic progenitor cell differentiation	0.0123808	0.327957	1.19417e-07	6.66651e-07	Gata2/Ston2/Kdr/Apobec3/Lmbr1l/Ptprc/Flt1/Jam3/Sbds/Cebpd/Dhtkd1/Bmp4/Fas/Eml1/Samd9l/Sirpa/Flcn/Cited2/Ext1/Mlf1/Trp53/Zfp36/Zswim9/Dhx36/Lyn/Chd2/Tcf15/Rest/Sfrp1/Kcp/Bcl2/Tgfb1/Ap3b1/Herc6/Cdk6/Bves/Lig4/Setd1a/Tcaf2/Tmem143/Adar/Rrs1/Dock7/Thsd1/Armc6/Ptpn6/Anln/Fstl3/3830403N18Rik/Mettl14/Sos2/N4bp2l2/Sos1/Sipa1l3/Slc7a6os/Med1/Rara/Acp6/Hmga1/Nudt21/Gpatch4	61
GO:0060420	regulation of heart growth	0.00750964	0.402174	1.23035e-07	6.85615e-07	Pi16/Col14a1/Adrb1/Ccnd2/Gja1/Dusp6/Rgs4/Nr3c1/Cxadr/Bmpr1a/Kcnk2/Gata6/Cited2/Tbx5/Fgf2/Jarid2/Tgfbr2/Hdac2/Akap6/Slc25a4/Yap1/Fgf9/Mapk11/Mef2c/Trip10/Ctdp1/Vgll4/Cav3/Sirt1/Igf1/Acacb/Mapk14/Pim1/Tbx2/Zfpm2/Tgfbr3/Tbx20	37
GO:0016482	cytosolic transport	0.0115689	0.335294	1.31297e-07	7.29046e-07	Heatr5b/Dab2/Lrrk2/Vps11/Ighm/Heatr5a/Coro1a/Rhobtb3/Erc1/Tbc1d17/Sybu/Tbc1d5/Rab7/Washc1/Tbc1d10c/Rab21/Bet1l/Slc30a6/Rnf126/Snx16/Mecp2/Washc2/Dennd10/Hook2/Vps53/Snx5/Flna/Map2k1/Dctn1/Gbf1/Kif16b/Sgsm2/Cltc/Wdr81/Hook3/Evi5/Mtmr2/Rilp/Atg14/Vamp3/Arfrp1/Wdr91/Mapk8/Actr2/Stx8/Vps29/Ankrd27/Golt1b/Ykt6/Ap1s1/Snx2/Ric1/Syt7/Rab29/Tanc2/Dnajc13/Gak	57
GO:0030010	establishment of cell polarity	0.0115689	0.335294	1.31297e-07	7.29046e-07	Fscn1/Amotl2/Clasp1/Gja1/Wnt5a/Jam3/Myh9/Cyp26b1/Amot/Ephb1/Map1b/Sipa1/Sdccag8/Cfl1/Fat1/Llgl2/Ift20/Gpsm1/Exoc4/Lmna/Tcf15/Clasp2/Tcirg1/Ptk2b/Myo9a/Igf1r/Ripor2/Dock8/Slc9a6/Cdc42/Dctn1/Gbf1/Cyth1/Alpk2/Fbf1/Crkl/Dock7/Arfgef1/Phldb2/Kcnj8/Stk11/Mad2l1/Myo9b/Wee1/Itgb1/Shtn1/Cdk5rap2/Cyth3/Sipa1l3/Numa1/Rhoa/Amotl1/Cyrib/Ttc8/Krit1/Dynlt1b/Pard6a	57
GO:0060048	cardiac muscle contraction	0.00974224	0.358209	1.32477e-07	7.34286e-07	Myh7/Ccn2/Adrb1/Snta1/Ppp1r13l/Tmem38b/Tnni2/Zfas1/Scn4b/Pde4b/Cacnb2/Bin1/Gja5/Dsc2/Actc1/Cav1/Map2k6/Smtn/Kcnh2/Sgcd/Ank2/Tnnt2/Gpd1l/Camk2d/Abcc9/Pde5a/Hcn4/Csrp3/Akap6/Uty/Map2k3/Casq2/Nppa/Flna/Smad7/Kcnj2/Strit1/Atp1a1/Cav3/Rnf207/Ctnna3/Kcnj8/Ace2/Slc8a1/Srsf1/Dmd/Stc1/Pkp2	48
GO:0046173	polyol biosynthetic process	0.00588593	0.453125	1.32765e-07	7.34571e-07	Pth1r/Sphk1/Itpkb/Myh9/Ppip5k1/Fgf2/Acer2/Cyp27a1/Plcg2/Plcd1/P2ry1/Sptlc2/Got1/Asah2/Ptk2b/Sphk2/Dhfr/Ip6k1/Adcyap1r1/Ip6k2/Ip6k3/Itpkc/Pts/Asah1/Akr1b1/P2ry6/Qdpr/Ephx1/Plcg1	29
GO:0055021	regulation of cardiac muscle tissue growth	0.00710371	0.411765	1.34009e-07	7.40137e-07	Pi16/Col14a1/Adrb1/Ccnd2/Gja1/Rgs4/Nr3c1/Cxadr/Bmpr1a/Kcnk2/Gata6/Cited2/Tbx5/Fgf2/Jarid2/Tgfbr2/Hdac2/Akap6/Slc25a4/Yap1/Fgf9/Mapk11/Mef2c/Trip10/Ctdp1/Vgll4/Cav3/Sirt1/Igf1/Mapk14/Pim1/Tbx2/Zfpm2/Tgfbr3/Tbx20	35
GO:0007029	endoplasmic reticulum organization	0.0077126	0.395833	1.37021e-07	7.54953e-07	Retreg1/Reep1/Wnk1/Reep5/Tmem38b/Lrrk2/Cacna1s/Get4/Casq1/Lman1/Steep1/Get1/Rtn3/Myzap/Use1/Cav2/Tmem33/Zfyve27/Sgta/Lnpk/Tmem170/Get3/Bag6/Tmcc1/Rab5if/Tmco1/Mmgt1/Atl1/Reep3/Mia3/Emc10/Shtn1/Polr2m/Jagn1/Vcpip1/Sec31a/Gak/Sec16a	38
GO:1902074	response to salt	0.0196874	0.282799	1.37223e-07	7.54953e-07	Mt1/Tuba1a/Syt12/Ly6c1/Wnk1/Alpl/Akr1c14/Adcy7/Lgmn/Egr1/Itpkb/Trpc3/Fas/Bdnf/Slc25a13/Fgfr3/Ppif/Kcnj11/Cav1/Kcnb1/Plcg2/Sipa1/Nt5e/Plcd1/Ehmt2/Nfatc2/Sorbs1/Thbs1/Crls1/Tnnt2/Mecp2/Parp1/Abcc9/Dlg4/Rgs10/Fabp4/Igf1r/Alg2/Daxx/Lmnb1/Mef2c/Dhfr/Ednrb/Slc25a12/Ppp2r2a/Large1/Ank/Crkl/Itpr3/Prkn/Prkaa2/Nek7/Pdcd6/Pla2g4a/Ly6e/Slc12a2/Crebbp/Kcnj8/Fyn/Asph/Cpne2/Ptch1/Itpkc/Amigo1/Slc8a1/Nfatc4/Dmtn…	97
GO:0036294	cellular response to decreased oxygen levels	0.0103511	0.349315	1.3742e-07	7.54953e-07	Egln3/Hif3a/Eif4ebp1/Ak4/Bnip3/Fndc1/Egr1/Zfas1/Epha4/Kcnk2/Gata6/Cited2/Rgcc/Hyou1/Tigar/Trp53/Nop53/Myc/Ogt/Aqp1/Kcnd2/Kcnk3/Suv39h1/Tsc1/Dnmt3a/Bcl2/Tgfb1/Rora/Akt1/Egln2/Map2k1/Daxx/Cr1l/Ptgis/Mlst8/Cpeb1/Sirt2/Sirt1/P4hb/Ajuba/Npepps/Pgk1/Bmyc/Pink1/Fam162a/Ado/Epas1/Rock2/Commd1/Gnb1/Higd1a	51
GO:0001659	temperature homeostasis	0.0127867	0.323077	1.38405e-07	7.59025e-07	Lcn2/Apln/Lama4/Adrb1/Alpl/Adam17/Fabp5/Il4ra/Sqstm1/Egr1/Ces1d/Gja1/Bmal1/Kdm3a/Gatm/Grb10/Oma1/Ccr2/Flcn/Adipor2/Atf4/Cav1/Cpt2/Pctp/Map2k6/Cidea/Nr1d1/Ogt/Trpv2/Napepld/Il15/Fabp4/Ybx2/Igf1r/Prlr/Prkab2/Prdm16/Per2/Ip6k1/Acot11/Arrdc3/Ednrb/Appl2/Dock7/Zbtb7b/Stk11/Tfe3/Slc25a44/Ppargc1a/Epas1/Igf2bp2/Scd1/Sfxn5/Slc27a1/Nr1h3/Ache/Gnas/Ebf2/Ddit3/Thra/Nova1/Lepr/Gpx1	63
GO:0008347	glial cell migration	0.00629186	0.43662	1.40973e-07	7.71747e-07	Col3a1/Matn2/Vcan/Vim/Fn1/Adgrg1/Pmp22/Epha4/Fas/Lamb1/Ndn/Ccr2/Atp1b2/Cspg4/P2ry1/Efemp1/Ntn1/Csf1/Syne2/Reln/Tgfb2/Idh2/Hexb/Crkl/Cx3cl1/Cers2/Apcdd1/Rras/Cd9/Nf1/Dab2ip	31
GO:0090201	negative regulation of release of cytochrome c from mitochondria	0.00304445	0.681818	1.49479e-07	8.16872e-07	Bcl2l1/Ppif/Lmna/Akt1/Arrb2/Bak1/Opa1/Prelid1/Prkn/Psmd10/Igf1/Parl/Triap1/Gpx1/Higd1a	15
GO:0051961	negative regulation of nervous system development	0.0121778	0.327869	1.52511e-07	8.31291e-07	Gata2/Sema3c/Fstl4/Nrp1/Sema6b/Wnt5a/Ifrd1/Bmp4/Fas/Mdga1/Bdnf/Fgfr3/Bmpr1a/Ulk2/Sema6d/Ptprs/Trp53/Trak2/Mbd1/Nr1d1/Thy1/Sema6a/Sema3g/Ntn1/Mecp2/Rest/Rgma/Sema3b/Tgfb1/Dusp10/Slit2/Epha7/Sema7a/Idh2/Sema5a/Ulk1/Ctnna1/Ptk2/Sirt2/Appl2/Ywhah/Ttc3/Atf5/Hook3/Cers2/Ldlr/Tlr2/Nfatc4/Casz1/Cd24a/Lrp4/Tmem98/Kctd11/Sema6c/Sema4a/Rhoa/Sema3a/Actr3/Nf1/Dynlt1b	60
GO:0014855	striated muscle cell proliferation	0.00730668	0.404494	1.52652e-07	8.31291e-07	Ccnd2/Selenon/Gja1/Dipk2a/Cxadr/Bmpr1a/Ephb1/Kcnk2/Gata6/Cited2/Tbx5/Cflar/Fgf2/Six5/Jarid2/Tgfbr2/Hdac2/Cav2/Snhg15/Yap1/Fgf9/Mapk11/Mef2c/Tgfb2/Angpt1/Vgll4/Myh10/Sirt1/Mapk14/Pim1/Tbx2/Kpna1/Zfpm2/Smad1/Tgfbr3/Tbx20	36
GO:0051259	protein complex oligomerization	0.0160341	0.299242	1.57205e-07	8.54591e-07	Gnmt/Kcnv2/Cd74/Col1a2/Pxdn/Polq/Ninj1/Nacc2/Peg10/Crtc2/Kcnc1/Acaca/Aldh1a2/Ehd4/Zfp777/Lrrc8a/Tnfaip1/Hsd17b10/Cth/Kcnb1/Trp53/Tmem120a/Vasp/Cutc/Gsdmd/Mlkl/Pnpt1/Lrrc8c/Ehd1/Tmem70/Kctd6/Kcnd2/Bok/Apip/Tk1/Trim65/Mcu/Ripor2/Sgta/Golga2/Me1/Oas1b/Cpsf7/Stk3/Evl/Opa1/Kctd12/Kcnj2/Prmt1/Appl2/Micu1/Kcnd3/Sting1/Chmp2a/Fkrp/Atl1/Ugdh/Trp53bp1/Wdcp/Mat2a/Acacb/Cep57/Dnm1l/Gls/Card9/Kctd11/Prnp/Sigm…	79
GO:0003205	cardiac chamber development	0.0129896	0.32	1.63838e-07	8.89093e-07	Myh7/Sema3c/Heyl/Tmem65/Ppp1r13l/Nrp1/Plxnd1/Ltbp1/Nrp2/Wnt5a/Gja5/Bmp4/Xirp2/Bmpr1a/Gata6/Cited2/Tbx5/Dll4/Slit3/Trp53/Wnt11/Tgfbr2/Parva/Ank2/Chd7/Tnnt2/Smo/Trip11/Fzd2/Tgfb1/Heg1/Nsd2/Zmpste24/Tek/Slit2/Fgf9/Mef2c/Tgfb2/Smad7/Mdm2/Cav3/Myh10/Cpe/Naca/Fhl2/Ly6e/Kcnj8/Tab1/Naglu/Epor/Ccm2l/Rnls/Acvr1/Fkbp1a/Tbx2/Sos1/Nphp3/Pkp2/Ptcd2/Med1/Cntrl/Zfpm2/Tgfbr3/Tbx20	64
GO:2001236	regulation of extrinsic apoptotic signaling pathway	0.0115689	0.333333	1.64474e-07	8.90987e-07	Bcl2l1/Itga6/Unc5b/Pea15a/Tnfrsf12a/Ret/Nrp1/Gas1/Hmox1/Dab2/Ptprc/Tmbim1/Bmp4/Acsl5/Casp8/Timp3/Cav1/Cflar/Tmc8/Sgk3/Gclm/Mcl1/Thbs1/Agap2/Lmna/Sfrp1/Trps1/Bcl2/Itgav/Lgals3/Skil/Yap1/Stk3/Tgfb2/Snai2/Ctnna1/Ltbr/Dedd2/Gclc/Agt/Cx3cl1/Fyn/Igf1/Sh3rf1/Tnfsf10/Tnfaip3/Eya2/Acvr1/Ppp1ca/Pdia3/Stradb/Gstp2/Traf2/Nf1/Tcf7l2/Gpx1/Ar	57
GO:0032233	positive regulation of actin filament bundle assembly	0.0060889	0.441176	1.68698e-07	9.1228e-07	Ccn2/Nrp1/Ppm1f/Synpo2l/Arhgef15/S100a10/Pfn2/Carmil1/Rgcc/Sorbs3/Rhoc/Synpo2/Wnt11/Lpar1/Tsc1/Swap70/Cdc42/Flna/Limch1/Evl/Tgfb3/Rapgef3/Limk1/Cx3cl1/Pxn/Smad3/Cd47/Rock2/Rhoa/Ccdc88a	30
GO:0032273	positive regulation of protein polymerization	0.00750964	0.397849	1.70888e-07	9.22521e-07	Baiap2/Cdc42ep2/Bin1/Pfn2/Tppp3/Cdc42ep4/Carmil1/Cav1/Map1b/Nav3/Tppp/Lmod2/Vasp/Nck1/Gda/Mecp2/Ptk2b/Nckap1/Fchsd2/Dctn1/Mlst8/Evl/Nck2/Cdc42ep3/Snx9/Cav3/Grb2/Git1/Myo1c/Mapk8/Arl2/Cdk5rap2/Nckap1l/Numa1/Rhoa/Mapt/Actr3	37
GO:0006352	DNA-templated transcription initiation	0.00974224	0.355556	1.71763e-07	9.25635e-07	Brf1/Nfkbia/Ercc1/Trp53/Creb1/Tfb1m/Med25/Myc/Dhx36/Gtf3c5/Tbp/Tfam/Med20/Med12/Smarca5/Polr1e/Ccnh/Gtf3c1/Gtf2e2/Med15/Taf6/Med11/Lipe/Cavin1/Mdc1/Med8/Taf2/Setx/Xpa/Bclaf1/Ubtf/Taf4b/Gtf3c4/Tbpl1/Polr3h/Jun/Gtf2b/Cand1/Thra/Gtf2e1/Med28/Med1/Med19/Med13/Taf1/Cdk7/Ttf1/Med16	48
GO:0031952	regulation of protein autophosphorylation	0.00466816	0.511111	1.72499e-07	9.27995e-07	Eef2k/Errfi1/Ptprc/Ngf/Cav1/Rap2a/Vegfc/Ace/Gpnmb/Prlr/Epha7/Rap2b/Rap2c/Tnks1bp1/Impact/Tom1l1/Rassf2/Ppp2r5d/Jun/Mre11a/Iqgap1/Pdgfd/Ppp2ca	23
GO:0006816	calcium ion transport	0.0251674	0.264392	1.77853e-07	9.55143e-07	Ccn2/Adrb1/Selenon/Tmem38b/Gja1/Zfas1/Ptprc/Trpv4/Cxcl12/Rgs4/Inpp5k/Ibtk/Pde4b/Cacnb2/Trpc3/Coro1a/Dysf/Bin1/Gp1ba/Bmp4/Tspan13/Ngf/Adora2a/Ramp2/Calcrl/Cacna1s/Casq1/Cav1/Fgf2/Plcg2/Plcd1/Ace/Cabp1/Thy1/Usp2/Ank2/Chd7/Plcb4/Lyn/Trpv2/Camk2d/Ahnak/Akap6/Bcl2/Tgfb1/Ptk2b/Itgav/Plce1/Epm2a/Zmpste24/Casq2/Nppa/Mcu/Akt1/Arrb2/Lgals3/Flna/Plp1/Bak1/Epb41/Pacsin3/Sphk2/Adcyap1r1/Tgfb2/Grin3b/Ednrb/Opa…	124
GO:0043536	positive regulation of blood vessel endothelial cell migration	0.00548001	0.465517	1.80209e-07	9.66128e-07	Hdac9/Gata2/Ets1/Kdr/Nrp1/Adam17/Hmox1/Amot/Prkca/Fgf2/Col18a1/Vegfc/Srpx2/Thbs1/Fgf18/Tgfb1/Plk2/Map2k3/Akt1/Angpt1/Sirt1/Igf1/Akt3/Stat5a/Rhoj/Amotl1/Plcg1	27
GO:0090311	regulation of protein deacetylation	0.00426223	0.538462	1.85937e-07	9.95124e-07	Dysf/Fry/Ndn/Spred2/Tppp/Yeats2/Hdac2/Tada3/Suv39h1/Tgfb1/Smarca5/Spred1/Dyrk1a/Sirt1/Kat14/Prkaa2/Ripk3/Prkaa1/Brms1/Mapt/Mbip	21
GO:0006473	protein acetylation	0.00872742	0.37069	1.94331e-07	1.03648e-06	Gata2/Klf15/Sphk1/Crtc2/Bmal1/Morf4l1/Naa20/Nfya/Brd8dc/Yeats2/Hdac2/Smo/Mecp2/Tgfb1/Smarca5/Atat1/Ruvbl2/Nat10/Kansl3/Bag6/Sirt1/Kat14/Prkaa2/Baz1b/Msl3/Crebbp/Myo1c/Taok1/Auts2/Naa35/Xbp1/Msl1/Kat8/Naa50/Dmap1/Arid5a/Prkaa1/Gtf2b/Kif3a/Hdac8/Phf20/Mrgbp/Hint2	43
GO:0014074	response to purine-containing compound	0.00872742	0.37069	1.94331e-07	1.03648e-06	Cdo1/Pik3r1/Selenon/Tmem38b/Gpd1/Inpp5k/Trpc3/Igfbp5/Adora2a/Per1/Crem/Kcnj11/Plcg2/Nt5e/Creb1/P2ry1/Aqp1/Abcc9/Hmgcs1/Hcn4/Akap6/Casq2/Slc26a6/Rapgef3/Itpr3/Prkaa2/Rapgef1/Kcnj8/Asph/Carm1/Slc8a1/Dmtn/Mat2a/P2rx5/Fkbp1a/P2ry6/Itpr1/Hsp90b1/Prkaa1/Ndufs4/Pkd2/Hmga1/Hcn2	43
GO:0015980	energy derivation by oxidation of organic compounds	0.0198904	0.28	1.98473e-07	1.05676e-06	Gnmt/Pcdh12/Ak4/Adrb1/Bnip3/Adgrf5/Trpv4/Gpd1/Afg1l/Gabarapl1/Inpp5k/Coq10b/Ogdhl/Lyrm7/Slc37a2/Dhtkd1/Gfpt1/Bdnf/Grb10/Cavin3/Slc25a13/Cox10/Sdhaf4/Ppif/Phkg1/Phka1/Flcn/Mtfr1/C1qtnf2/Tigar/Khk/Trp53/Nop53/Iscu/Nr1d1/Sorbs1/Myc/Pnpt1/Irs2/Phkb/Atpsckmt/Insr/Ndufaf1/Coa6/Epm2a/Esrrb/Ifnlr1/Akt1/Cycs/Ppp1r2/Ppp1r3d/Prdm16/Stk40/Ppp1r3b/Per2/Oas1b/Phka2/Idh2/Slc25a12/Ndufa2/Mtln/Gys1/Prelid1/Ndufa7…	98
GO:0006487	protein N-linked glycosylation	0.00588593	0.446154	2.00719e-07	1.06689e-06	Pmm1/Mgat5/Alg9/Magt1/Gfpt1/Mgat3/Alg14/Uggt2/Fut8/St6gal1/Mogs/Dpm1/Entpd5/Ostc/Alg2/Stt3a/Rpn2/Alg10b/Mgat2/Mlec/B4galt1/Alg6/Uggt1/B4galt7/Ube2j1/Alg12/Rpn1/Ext2/Alg5	29
GO:0007492	endoderm development	0.00669779	0.417722	2.02222e-07	1.07199e-06	Col5a1/Col5a2/Fn1/Tnrc6a/Myh9/Sox17/Bmp4/Bmpr1a/Dusp1/Gata6/Ext1/Sox7/Leo1/Tgfb1/Med12/Itgav/Itga5/Nckap1/Map2k1/Angpt2/Angpt1/Vtn/Kif16b/Rtf1/Tnrc6c/Grb2/Ctr9/Dusp4/Smad3/Paf1/Hhex/Epb41l5/Hdac1	33
GO:1903076	regulation of protein localization to plasma membrane	0.00893038	0.366667	2.02368e-07	1.07199e-06	Bcl2l1/Pik3r1/Actb/Wnk1/Sqstm1/Ppfia1/Dab2/Tmbim1/Vamp8/Kcnj11/Appl1/Cnpy4/Picalm/Lrrc15/Csk/Tamalin/Mmp14/Sorbs1/Camk2d/Numb/Csrp3/Tgfb1/Epm2a/Akt1/Lgals3/Ldlrap1/Rhoq/Csnk2a1/Cltc/Camk2a/Prnp/Itgb1/Stx8/Pid1/Arhgap44/Ppp2r5a/Wnk4/Commd1/Ptpn9/Egfr/Actr3/Myo5b/Ar/Camk2b	44
GO:0008033	tRNA processing	0.00913335	0.362903	2.09123e-07	1.10589e-06	Trmt1l/Trmt2b/Hsd17b10/Ankrd16/Tsen15/Wdr6/Mto1/Rpp25/Pnpt1/Trmt1/Trmt12/Nsun4/Tyw3/Nsun2/Akt1/Lsm6/Ddx1/Ctu2/Cdk5rap1/Cdkal1/Dus4l/Nat10/Pop7/Dus1l/Ptcd1/Aars1/Qtrt1/Rpp25l/Thada/Trmt6/Thumpd2/Clp1/Sars1/Trnt1/Dus3l/Osgep/Trpt1/Thumpd1/Rtcb/Rtraf/Trmu/Tsen34/Trmt11/Yrdc/Tsen54	45
GO:0009408	response to heat	0.00730668	0.4	2.12815e-07	1.12081e-06	Trp53inp1/Chordc1/Tcim/Hmox1/Trpv4/Pmp22/Bag3/Casq1/Sod1/Myof/Hikeshi/Xylt1/Zfp976/Psip1/Dnaja1/Eif2b3/Dhx36/Dnaja3/Eif2b5/Akt1/Daxx/Hsbp1l1/Gclc/Pdcd6/Igf1/Eif2b2/Eif2b1/Lrp11/Pdcl3/Irak1/Hspb2/Dhx9/Prkaca/Mapt/Nf1/Eif2b4	36
GO:0033627	cell adhesion mediated by integrin	0.00730668	0.4	2.12815e-07	1.12081e-06	Itga6/Cyp1b1/Itga9/Itga1/Emilin1/Wnk1/Ret/Adam17/Ptpn11/Fbn1/Jam3/Col16a1/Itgbl1/Ext1/Acer2/Plpp3/Plau/Lyn/Swap70/Itgav/Itgb5/Itga5/L1cam/Tgfb2/Snai2/Ptk2/Crkl/Vtn/Ptpn6/Efna1/Ift74/Cd24a/Itgb1/Tesc/Adam9/Nckap1l	36
GO:0002758	innate immune response-activating signaling pathway	0.0150193	0.303279	2.13026e-07	1.12081e-06	Pik3r1/Irf7/Ninj1/Ddx60/Gbp2/Tspan6/Hspd1/Colec12/Tnip2/Irgm1/Nfkbia/Riok3/Irak3/Cav1/Appl1/Lacc1/Ptprs/Plcg2/Znrf1/Nop53/Ifi35/Gps2/Nr1d1/Mapkapk3/Unc93b1/Lyn/Nploc4/Trim3/Chuk/Lbp/Alpk1/Ap3b1/Rftn1/Tlr3/Slc15a3/Arrb2/Traf6/Atat1/Traf3/Tyrobp/Otulin/Oas1b/Tril/Sirt2/Ipo5/Appl2/Nek7/Sting1/Hcfc2/Kcnj8/Irf1/Naglu/Trim25/Gpatch3/Tlr2/Brcc3/Tnfaip3/Pdpk1/Rnf125/Lsm14a/Mapk8/Nr1h3/Tirap/Mark4/C1qbp/E…	74
GO:0051222	positive regulation of protein transport	0.0196874	0.280347	2.14475e-07	1.12653e-06	Doc2b/Pik3r1/Glul/Myrip/Ankrd1/Gja1/Myh9/Adora2a/Vamp8/Sybu/Dynll1/Tmem132a/Oxct1/Wipf1/Bag3/Kcnb1/Vegfc/Zpr1/Crebrf/Pdcd5/Cd2ap/Sar1a/Prkcd/Rapgef4/Irs2/Smo/Camk2n1/Cd38/Fbxw7/Pcnt/Wls/Tgfb1/Cep131/Oaz2/Sfn/Mcu/Tek/Tm9sf4/Cdc42/Flna/Rph3al/Hspa1l/Tcaf1/Stom/Tcaf2/Tgfb2/Tgfb3/Uaca/Rapgef3/C2cd5/Mdm2/Ppid/Ipo5/Blk/Myh10/Prkn/Sirt1/Abcg1/Fyn/Igf1/Erbb2/Asph/Camk1/Myo1c/Fis1/Tlr2/Xbp1/Mapk14/Dnm1l/R…	97
GO:0010952	positive regulation of peptidase activity	0.0125837	0.321244	2.17322e-07	1.13955e-06	Ccn2/Xdh/Rcn3/Ret/Perp/Ctsl/Lgmn/Ddrgk1/Ppm1f/Epha4/Fas/Ngf/Hspd1/Casp8/Dap/Acer2/Picalm/Antxr1/Pdcd5/Myc/Tfap4/Lyn/Dnaja3/Sox7/Rest/Bok/Cycs/Bak1/Uaca/Prelid1/Stat1/Sirt1/Col4a3/Hip1r/Pdcd6/Efna1/Fyn/Wdr35/Asph/Fis1/Bmyc/Vsir/Bcl2l11/Mapk9/Tnfsf10/Fam162a/Ift57/Hip1/Smad3/Card9/Arl6ip5/Arrb1/Ctsh/Rock2/Mul1/Mtch1/Psenen/Casp2/Rps27l/Rhoa/Rnf7/Ctsd	62
GO:0016485	protein processing	0.0160341	0.296992	2.21873e-07	1.16146e-06	Rps6ka2/Ppp1r15a/Pcsk6/Hjv/Adam17/Perp/Lgmn/Gas1/Anpep/Lrrk2/Enpep/Fam111a/Myh9/Mme/S100a10/Oma1/Adam10/Casp8/Xiap/Cpxm2/Furin/Capn1/Asrgl1/Rnpep/Plat/Ace/Ece1/Mmp14/Myc/Casp3/Ogt/Thbs1/Casp6/Plau/Adamts3/Disp1/Xpnpep3/C2cd3/Bace2/Parp1/Pcsk4/Spcs3/Ctla2a/Zmpste24/Bak1/Rhbdd1/Adamts2/Srgn/Adam19/Mdm2/Sprtn/Ccbe1/P4hb/Sirt4/Cpe/Pmpcb/Fkrp/Cpxm1/Pgk1/Asph/Naglu/Cpd/Ptch1/Casp7/Vsir/Atp23/Bmp1/Parl/…	79
GO:0009743	response to carbohydrate	0.0140045	0.309417	2.34058e-07	1.22319e-06	Rps6ka2/Glul/Pim3/Vcam1/Stxbp4/Egr1/Ptprn/Myh9/Pfkl/Tbc1d1/Sybu/Dynll1/Calcrl/Prkca/Oxct1/Kcnb1/Khk/Nr1d1/Casp3/Ogt/Thbs1/Casp6/Eif2b3/Irs2/Smarcb1/Camk2n1/Pde3b/Igf1r/Eif2b5/Abca12/Gpam/Zbtb20/Sidt2/Slc26a6/Prkn/Sirt1/Prkaa2/Pde8b/Abcg1/Igf1/Sgcb/Naglu/Rab11fip5/Eif2b2/Ncf2/Eif2b1/Xbp1/Zbed6/Srebf1/Rab34/Hmgcr/Rmi1/Ppp3cb/Extl3/Arrb1/Gas6/Klf7/Prkaa1/Selenot/Osbp/Prkaca/Jagn1/Ndufaf2/Slc12a7/Hmg…	69
GO:0002695	negative regulation of leukocyte activation	0.0131926	0.315534	2.34618e-07	1.22406e-06	H2-Aa/Cd74/Bcl6/Twsg1/Adgrf5/Dusp3/Il4ra/Hmox1/Fn1/Bmp4/Fas/Adora2a/Zbtb46/Socs5/Il20rb/Ccr2/Cd200/Tbc1d10c/Pla2g5/Mertk/Nr1d1/Gpnmb/Casp3/Fbxo7/Cd276/Cblb/Lyn/Sfrp1/Pde5a/Atm/Tgfb1/Glmn/Dusp22/Ripor2/Tnfrsf21/Lgals3/Cbfb/Tyrobp/Zc3h8/Smad7/Zfp608/Cd274/Hlx/Cx3cl1/Zbtb7b/Ptpn6/Irf1/Erbb2/Lrrc32/Vsir/Ldlr/Tnfaip3/Cd24a/Pag1/Nr1h3/Prnp/Ctla4/Enpp3/Hmgb3/Pkn1/Nckap1l/Loxl3/Syt11/Lgals9/Peli1	65
GO:0009306	protein secretion	0.0235437	0.267281	2.38699e-07	1.24326e-06	Doc2b/Glul/Pim3/Rcn3/Myrip/Ankrd1/Nos2/Stxbp4/Ptpn11/Gja1/Ptprn/Fbn1/Steap3/Myh9/Midn/Bmal1/Pfkl/Gja5/Adora2a/Tbc1d1/Vamp8/Sybu/Dynll1/Alox5/Tmem132a/Oxct1/Cd200/Kcnj11/Cyb5r4/Kcnb1/Mia2/Vegfc/Cyp51/Apoe/Nr1d1/Gsdmd/Cd2ap/Tvp23b/Rapgef4/Irs2/Llgl2/Abca1/Rest/Sfrp1/Camk2n1/Cd38/Pde3b/Wls/Rhbdf1/Tcirg1/Tgfb1/Mcu/Abca12/Slc4a8/Rph3al/Per2/Sidt2/Tgfb2/Tgfb3/Idh2/Ednrb/Rab3a/Rab3d/Tmem167/Ppid/Blk/Myh…	116
GO:0008630	intrinsic apoptotic signaling pathway in response to DNA damage	0.00852446	0.371681	2.46197e-07	1.28017e-06	Cdkn1a/Bcl2l1/Cd74/Pik3r1/Clu/Nacc2/Hmox1/Cxcl12/Fnip2/Steap3/Hic1/Ddit4/Hipk1/Trp53/Myc/Mcl1/Plscr1/Bok/Bcl2/Atm/Sfn/Skil/Phlda3/Bak1/Cdkn2d/Uaca/Snai2/Bag6/Sirt1/Bcl2l11/Xpa/Nfatc4/Pias4/Snw1/Bcl3/Brca2/Triap1/Casp2/Rps27l/Ackr3/Sod2/Fbh1	42
GO:1901657	glycosyl compound metabolic process	0.00649482	0.421053	2.47336e-07	1.28395e-06	Gnmt/Xdh/Ahcy/Akr1c14/Abcg2/Nt5c1a/Ahcyl/Gusb/Nt5e/Dpyd/Cdadc1/Dck/Gda/Trmt12/Tyw3/Adal/Nt5c3/Tk1/Tk2/Fuca1/Dtymk/Nudt1/Enpp4/Dguok/Pgm2/Akr1b1/Oard1/Nt5c2/Naga/Mtap/Pycr3/Fuca2	32
GO:0009416	response to light stimulus	0.0188756	0.282675	2.512e-07	1.30184e-06	Cdkn1a/Tuba1a/Cirbp/Pik3r1/Trp53inp1/Ccnd1/Mme/Mmp3/Per1/Uvssa/Cry2/Ext1/Ercc1/Hus1/Ap1s2/Trp53/Creb1/Mmp2/Casp3/Bmf/Xpc/Fbxl3/Cul4b/Aqp1/Abca7/Prkcd/Rev1/Usp2/Dhx36/Ift20/Atxn1/Mecp2/Parp1/Hmgn1/Fbxw7/Bcl2/Akt1/Ric8a/Per2/Ruvbl2/Bak1/Agap3/Mapk11/Rhbdd1/Cdkn2d/Atp8a2/Sema5a/Mettl3/Uaca/Sprtn/Large1/Ppid/Tanc1/Gnb5/Sirt1/Ndrg4/Pde8b/Pias1/Crebbp/Stk11/Casp7/Sdf4/Mapk9/Xpa/Nfatc4/Actr5/Mapk14/Rad1…	93
GO:0042391	regulation of membrane potential	0.0259793	0.260692	2.63657e-07	1.36412e-06	Bcl2l1/Baiap2/Nnt/Adrb1/Bnip3/Kdr/Snta1/Myh14/Cux2/Xirp1/Gja1/Lrrk2/Rgs4/Scn4b/Afdn/Cacnb2/Bin1/Gja5/Cxadr/Dsc2/Tspan4/Pmp22/Adora2a/Rgs7bp/Bdnf/Clcn1/Dynll1/Ubb/Igsf9b/Kcnk2/Atp1b2/Kcnj11/Tbx5/Tmem25/Cav1/Mllt11/Sod1/Kcnb1/Fhl1/Tspan9/Popdc3/Gclm/Kcnh2/Myc/Clic1/Ank2/Rapgef4/Grik5/Reln/Kcnd2/Ptpn3/Kcnk3/Got1/Gpd1l/Atxn1/Mecp2/Camk2d/Nr3c2/Parp1/Chrnb1/Scn3a/Abcc9/Hcn4/Ppp1r9a/Bok/Akap6/Bcl2/Dlg4…	128
GO:0014897	striated muscle hypertrophy	0.00893038	0.363636	2.65802e-07	1.37293e-06	Pi16/Myh7/Col14a1/Adrb1/Trim63/Klf15/Errfi1/Rgs4/Nr3c1/Trpc3/Bmp4/Igfbp5/Prkca/Mir208b/Gata6/Nppb/Jarid2/Ece1/Fbxo32/Camk2d/Lmna/Mtpn/Parp1/Pde5a/Csrp3/Akap6/Nppa/Slc25a4/Mef2c/Trip10/Cdk9/Ctdp1/Ptk2/Cav3/Sirt1/Agt/Igf1/Rap1gds1/Smad3/Sorbs2/Rock2/Mlip/Smad1/Ar	44
GO:1901990	regulation of mitotic cell cycle phase transition	0.0194845	0.279883	2.68442e-07	1.38427e-06	Cdkn1a/Fam107a/Cenpf/Ccnd1/Fbxo31/Actb/Ddr2/Ccnd2/Adam17/Nacc2/Hacd1/Miip/Prmt2/Ctdsp2/Pkia/Dync1li1/Hecw2/Syf2/Cdk5rap3/Rgcc/Appl1/Ccng1/Hus1/Fhl1/Trp53/Nop53/Gpnmb/Cenpj/Larp7/Xpc/Tfap4/Cul4b/Taok3/Fbxo7/Smarcb1/Bcl7c/Mecp2/Camk2d/Bcl2/Atm/Xrcc3/Tgfb1/Creb3l1/Cdc23/Bcl7b/Rpa2/Cdk4/Tmod3/Ccnh/Akt1/Rbbp8/Crlf3/Nabp2/Cdk6/Lmnb1/Cdkn2d/Mdm2/Appl2/Zwint/Dact1/Ptpn6/Crebbp/Ik/Rad21/Rfwd3/Taok1/Anapc7…	96
GO:0035592	establishment of protein localization to extracellular region	0.0235437	0.266667	2.71482e-07	1.39763e-06	Doc2b/Glul/Pim3/Rcn3/Myrip/Ankrd1/Nos2/Stxbp4/Ptpn11/Gja1/Ptprn/Fbn1/Steap3/Myh9/Midn/Bmal1/Pfkl/Gja5/Adora2a/Tbc1d1/Vamp8/Sybu/Dynll1/Alox5/Tmem132a/Oxct1/Cd200/Kcnj11/Cyb5r4/Kcnb1/Mia2/Vegfc/Cyp51/Apoe/Nr1d1/Gsdmd/Cd2ap/Tvp23b/Rapgef4/Irs2/Llgl2/Abca1/Rest/Sfrp1/Camk2n1/Cd38/Pde3b/Wls/Rhbdf1/Tcirg1/Tgfb1/Mcu/Abca12/Slc4a8/Rph3al/Per2/Sidt2/Tgfb2/Tgfb3/Idh2/Ednrb/Rab3a/Rab3d/Tmem167/Ppid/Blk/Myh…	116
GO:1905952	regulation of lipid localization	0.0123808	0.321053	2.77351e-07	1.42548e-06	Abca8b/Igfbp3/Abca8a/Ptpn11/Pnpla2/Ces1d/Plin3/Dab2/Anxa2/Pltp/Osbpl6/Bmp6/Acsl5/Nfkbia/Cry2/Washc1/Pla2r1/Furin/Cav1/Osbpl8/Apoe/Gps2/Map2k6/Cidea/Abca7/Thbs1/Prkcd/Ehd1/Irs2/Eprs1/Abca1/Lpl/Abcb4/Itgav/Eepd1/Asxl1/Abca12/Akt1/Ldlrap1/Atp8a2/Prelid1/Sirt1/Abcg1/Pla2g4a/Agt/Fis1/Ptch1/C1qtnf1/Mapk9/Acacb/Fitm1/Tmem30a/Nr1h3/Cry1/Irak1/Dgat1/Tmem135/Triap1/Commd1/Fitm2/Plin5	61
GO:1900024	regulation of substrate adhesion-dependent cell spreading	0.00548001	0.457627	2.78331e-07	1.42815e-06	Postn/Myadm/Nrp1/Fbln1/Dab2/Spry4/S100a10/Carmil1/St6gal1/Calr/Enpp2/Cdc42/Flna/Dbn1/Lims1/Lims2/Ptk2/Crkl/P4hb/Prex1/Coro1c/Nedd9/Dmtn/Pdpn/Dock5/C1qbp/Pkp2	27
GO:0009746	response to hexose	0.0131926	0.31401	2.85541e-07	1.46274e-06	Glul/Pim3/Vcam1/Stxbp4/Egr1/Ptprn/Myh9/Pfkl/Tbc1d1/Sybu/Dynll1/Oxct1/Kcnb1/Khk/Nr1d1/Casp3/Ogt/Thbs1/Casp6/Eif2b3/Irs2/Smarcb1/Camk2n1/Pde3b/Igf1r/Eif2b5/Abca12/Gpam/Zbtb20/Sidt2/Slc26a6/Prkn/Sirt1/Prkaa2/Pde8b/Abcg1/Igf1/Sgcb/Rab11fip5/Eif2b2/Ncf2/Eif2b1/Xbp1/Zbed6/Srebf1/Rab34/Hmgcr/Rmi1/Ppp3cb/Extl3/Arrb1/Gas6/Klf7/Prkaa1/Selenot/Osbp/Prkaca/Jagn1/Ndufaf2/Slc12a7/Hmga1/Lepr/Tcf7l2/Gpx1/Eif2b4	65
GO:0034614	cellular response to reactive oxygen species	0.0101482	0.344828	2.86112e-07	1.46325e-06	Lcn2/Cyp1b1/Ddr2/Bnip3/Sqstm1/Sphk1/Lrrk2/Foxo3/Nqo1/Mmp3/Ppif/Sirpa/Capn1/Ercc6l2/Sod1/Mpv17l2/Trp53/Mmp2/Prdx1/Hdac2/Aqp1/Prkcd/Cfl1/Parp1/Sod3/Chuk/Atm/Akt1/Pdk2/Agap3/Dhfr/Sirt1/Ripk3/Fyn/Ccs/Setx/Mapk9/Slc8a1/Pink1/Rnf146/Tnfaip3/Akr1b1/Mapk8/Fancc/Jun/Rhob/Adprs/Egfr/Zfp580/Sod2	50
GO:0062013	positive regulation of small molecule metabolic process	0.0121778	0.322581	2.87882e-07	1.46989e-06	Bcl2l1/Cd74/Pth1r/Nos2/Ces1d/Dab2/Gpd1/Myh9/Bmp6/Acsl5/Stard4/Comt/C1qtnf2/Tigar/Plcd1/Apoe/P2ry1/Nr1d1/Gpt2/Sorbs1/Myc/Irs2/Insr/Slc45a3/Esrrb/Akt1/Map2k1/Zbtb20/Adcyap1r1/Mlst8/Slc25a12/Dgat2/Mtln/Sirt2/Prkn/Sirt1/Prkaa2/Abcg1/Pla2g4a/Agt/Sirt7/Igf1/Stk11/Lpgat1/Mapk9/Ppargc1a/Srebf1/Prxl2c/Nr1h3/P2ry6/Prkaa1/Cry1/Pid1/Dgat1/Prkaca/Gpt/Plin5/Ppp2ca/Slc4a4/Tcf7l2	60
GO:0043242	negative regulation of protein-containing complex disassembly	0.00730668	0.395604	2.94546e-07	1.50145e-06	Lmod3/Spta1/Trim54/Clasp1/Twf2/Dysf/Add3/Irak3/Carmil1/Map1b/Nav3/Lmod2/Eps8/Cfl1/Mtpn/Capza1/Clasp2/Swap70/Apc2/Tmod3/Stmn2/Ttbk2/Shroom2/Per2/Rubcn/Evl/Clec16a/Tmod4/Capzb/Taok1/Dmtn/Sptb/Gas2l1/Atxn7/Scaf8/Sptan1	36
GO:0002218	activation of innate immune response	0.016643	0.291815	2.994e-07	1.52369e-06	Ifi203/Pik3r1/Irf7/Mndal/Ninj1/Ddx60/Gbp2/Tspan6/Hspd1/Ifi207/Colec12/Tnip2/Irgm1/Nfkbia/Riok3/Irak3/Cav1/Appl1/Lacc1/Ptprs/Plcg2/Znrf1/Nop53/Ifi35/Gps2/Nr1d1/Mapkapk3/Unc93b1/Ifi205/Casp6/Lyn/Nploc4/Trim3/Chuk/Lbp/Alpk1/Ap3b1/Rftn1/Tlr3/Slc15a3/Arrb2/Traf6/Atat1/Traf3/Tyrobp/Otulin/Oas1b/Tril/Sirt2/Ipo5/Appl2/Nek7/Sting1/Hcfc2/Xrcc6/Kcnj8/Irf1/Naglu/Trim25/Gpatch3/Tlr2/Brcc3/Tnfaip3/Pdpk1/Rnf125…	82
GO:1903670	regulation of sprouting angiogenesis	0.00446519	0.511628	3.12056e-07	1.5855e-06	Glul/Adamts9/Flt1/Alox5/Fgf2/Synj2bp/Sema6a/Thbs1/Jmjd8/Creb3l1/Ppp1r16b/Dll1/Itga5/Jak1/Stard13/Bmper/Epn1/Tspan18/Rhoj/Tjp1/Pkm/Smad1	22
GO:1901879	regulation of protein depolymerization	0.00750964	0.389474	3.2292e-07	1.63803e-06	Nes/Lmod3/Spta1/Trim54/Clasp1/Twf2/Trpv4/Dysf/Add3/Carmil1/Map1b/Nav3/Lmod2/Eps8/Cfl1/Mtpn/Capza1/Clasp2/Swap70/Apc2/Tmod3/Stmn2/Ttbk2/Shroom2/Evl/Sema5a/Tmod4/Capzb/Asph/Taok1/Dmtn/Wdr1/Sptb/Actn2/Gas2l1/Atxn7/Sptan1	37
GO:0046605	regulation of centrosome cycle	0.00527704	0.464286	3.23672e-07	1.63917e-06	Chordc1/Xpo1/Dync1li1/Spice1/Wdr62/Ccnl2/Cenpj/Xrcc3/Cep131/Plk2/Azin1/Nat10/Chmp4b/Sirt1/Chmp2a/Atf5/Mapk8/Chmp1b/Mark4/Mdm1/Nubp1/Rock2/Cdk5rap2/Cep192/Cenatac/Chmp5	26
GO:0071634	regulation of transforming growth factor beta production	0.00426223	0.525	3.28438e-07	1.6606e-06	Lum/Ltbp1/Fbln1/Fn1/Bmpr1a/Cd200/Gata6/Furin/Creb1/Wnt11/Cd2ap/Thbs1/Laptm4b/Itgav/Tyrobp/Tgfb2/Agt/Cx3cl1/Lrrc32/Cd24a/Smad3	21
GO:1901136	carbohydrate derivative catabolic process	0.011163	0.331325	3.35377e-07	1.69293e-06	Xdh/Ahcy/Pde4a/Ctsl/Gpd1/Manba/Dut/Gnpda2/Nudt16/Nudt4/Nt5c1a/Ahcyl/Gusb/Fbxo44/Nudt15/Fgf2/Edem3/Nt5e/Dpyd/Amdhd2/Cdadc1/Gns/Entpd5/Entpd1/Prkcd/Gda/Man1a/Gpd1l/Pde5a/Adal/Tgfb1/Man1b1/Nt5c3/Fuca1/Galt/Arsb/Nudt1/Hexb/Ids/Entpd4b/Naglu/Enpp4/Gnpda1/Ctbs/Nt5c2/Samhd1/Man1c1/Pde1a/Ngly1/Naga/Fitm2/Nagk/Pycr3/Fuca2/Pank4	55
GO:0034284	response to monosaccharide	0.0131926	0.3125	3.46761e-07	1.74756e-06	Glul/Pim3/Vcam1/Stxbp4/Egr1/Ptprn/Myh9/Pfkl/Tbc1d1/Sybu/Dynll1/Oxct1/Kcnb1/Khk/Nr1d1/Casp3/Ogt/Thbs1/Casp6/Eif2b3/Irs2/Smarcb1/Camk2n1/Pde3b/Igf1r/Eif2b5/Abca12/Gpam/Zbtb20/Sidt2/Slc26a6/Prkn/Sirt1/Prkaa2/Pde8b/Abcg1/Igf1/Sgcb/Rab11fip5/Eif2b2/Ncf2/Eif2b1/Xbp1/Zbed6/Srebf1/Rab34/Hmgcr/Rmi1/Ppp3cb/Extl3/Arrb1/Gas6/Klf7/Prkaa1/Selenot/Osbp/Prkaca/Jagn1/Ndufaf2/Slc12a7/Hmga1/Lepr/Tcf7l2/Gpx1/Eif2b4	65
GO:0038202	TORC1 signaling	0.0077126	0.383838	3.49287e-07	1.75744e-06	Sesn1/Sik3/Sesn3/Fnip2/Rnf152/Gpr137c/Ube2n/Flcn/Gpr155/Castor1/Mfsd8/Rragc/Tsc1/Atm/Wdr59/Mios/Akt1/Nlk/C9orf72/Mlst8/Ywhaz/Ube2d1/Rnf167/Spaar/Kptn/Prkaa2/Clec16a/Stk11/Pim1/Telo2/Prkaa1/Klhl22/Prkaca/Akt1s1/Itfg2/Tbk1/Ube2w/Depdc5	38
GO:0034764	positive regulation of transmembrane transport	0.016643	0.29078	3.52282e-07	1.76965e-06	Lcn2/Adrb1/Ifngr2/Wnk1/Klf15/Ptpn11/Kcnc1/Slc36a2/Cacnb2/Trpc3/Bmp4/Acsl5/Alox5/Ccr2/Cnksr3/Atp1b2/Kcnj11/Adipor2/Casq1/C1qtnf2/Cav1/Appl1/Osbpl8/Plcg2/Thy1/Kcnh2/Wnk2/Sorbs1/Prkcd/Ank2/Irs2/Abcb1a/Cfl1/Reln/Kcnk3/Atpsckmt/Insr/Akap6/Aoc3/Nppa/Akt1/Flna/Azin1/Plp1/Bak1/Tcaf1/Adcyap1r1/Slc26a6/Rapgef3/C2cd5/Kcnj2/Strit1/Rnf207/Rhoq/Agt/Cx3cl1/Igf1/Asph/Slc7a5/Ace2/Amigo1/Pink1/Rasa1/Mapk14/P2rx5/L…	82
GO:0009749	response to glucose	0.0129896	0.313725	3.63837e-07	1.82474e-06	Glul/Pim3/Vcam1/Stxbp4/Egr1/Ptprn/Myh9/Pfkl/Tbc1d1/Sybu/Dynll1/Oxct1/Kcnb1/Khk/Nr1d1/Casp3/Ogt/Thbs1/Casp6/Eif2b3/Irs2/Smarcb1/Camk2n1/Pde3b/Igf1r/Eif2b5/Abca12/Gpam/Zbtb20/Sidt2/Prkn/Sirt1/Prkaa2/Pde8b/Abcg1/Igf1/Sgcb/Rab11fip5/Eif2b2/Ncf2/Eif2b1/Xbp1/Zbed6/Srebf1/Rab34/Hmgcr/Rmi1/Ppp3cb/Extl3/Arrb1/Gas6/Klf7/Prkaa1/Selenot/Osbp/Prkaca/Jagn1/Ndufaf2/Slc12a7/Hmga1/Lepr/Tcf7l2/Gpx1/Eif2b4	64
GO:0060350	endochondral bone morphogenesis	0.0060889	0.428571	3.66118e-07	1.83323e-06	Col3a1/Serpinh1/Col1a1/Alpl/Scx/Sik3/Trpv4/Bmp4/Bmp6/Col27a1/Ift80/Ext1/Hspg2/Fosl2/Tgfbr2/Mmp14/Thbs1/Trip11/Fgf18/Zmpste24/Rarb/Mef2c/Inppl1/Carm1/Pex7/Bpnt2/Gnas/Stc1/Ext2/Rara	30
GO:0040029	epigenetic regulation of gene expression	0.0142074	0.304348	3.85815e-07	1.92875e-06	Hdac9/Bcl6/Nr3c1/Tet1/Eif1/Ndn/Kmt2b/N6amt1/Lrif1/Trp53/Zfp445/Jarid2/Ubr2/Myc/Ezh1/Hdac2/Ogt/Smarcb1/Wbp2/Lmnb2/Dnmt1/Rbbp5/Mecp2/Lmna/Suv39h1/Dnmt3a/Uty/Smarca5/Tasor2/Glmn/Zmpste24/Mcrs1/Resf1/Lmnb1/Setd1a/Sphk2/Dyrk1a/Mettl3/Smchd1/Rlim/Kansl3/Sirt2/Morc2a/Sirt1/Spty2d1/Msl3/Sirt7/Smyd5/Ctr9/H19/Mtf2/Bmyc/Pcgf3/Rif1/Nrde2/Msl1/Glyr1/Baz1a/Kat8/Tasor/Gnas/Brd7/L3mbtl3/Meg3/Ythdc1/Mettl23/Kdm1b…	70
GO:0050768	negative regulation of neurogenesis	0.0115689	0.325714	3.93665e-07	1.96483e-06	Gata2/Sema3c/Fstl4/Nrp1/Sema6b/Wnt5a/Ifrd1/Bmp4/Fas/Bdnf/Fgfr3/Bmpr1a/Ulk2/Sema6d/Ptprs/Trp53/Trak2/Mbd1/Nr1d1/Thy1/Sema6a/Sema3g/Ntn1/Mecp2/Rest/Rgma/Sema3b/Tgfb1/Dusp10/Slit2/Epha7/Sema7a/Idh2/Sema5a/Ulk1/Ctnna1/Ptk2/Sirt2/Appl2/Ywhah/Ttc3/Atf5/Hook3/Cers2/Ldlr/Nfatc4/Casz1/Cd24a/Lrp4/Tmem98/Kctd11/Sema6c/Sema4a/Sema3a/Actr3/Nf1/Dynlt1b	57
GO:0060271	cilium assembly	0.0213111	0.271318	4.01075e-07	1.99861e-06	Ift122/Mkks/Ehd2/Nek1/Cc2d2a/Ehd4/Cfap43/Cep128/Rpgrip1l/Kctd17/Ift81/Intu/Tbc1d31/Odf2/Dynll1/Ift80/Ttc21b/Ccdc28b/Cep97/Tbc1d32/Sdccag8/Crocc/Clcn4/Cenpj/Dnaaf3/Fam149b/Parva/Ehd1/2700049A03Rik/Bbs7/Syne2/Odf2l/Septin6/Ift20/C2cd3/Lpar1/Cntrob/Atmin/Pcnt/Alpk1/Ttc12/Cep131/Ssx2ip/Akt1/Flna/Yap1/Ttbk2/Dctn1/Ocrl/Armc2/Wdr90/Ift46/Atg5/Ubxn10/Fbf1/Lama5/Cilk1/Tchp/Dnal1/Pfn4/Ift70b/Wdr35/Ift43/Ar…	105
GO:1903432	regulation of TORC1 signaling	0.00730668	0.391304	4.04803e-07	2.01396e-06	Sesn1/Sik3/Sesn3/Fnip2/Rnf152/Gpr137c/Ube2n/Flcn/Gpr155/Castor1/Rragc/Tsc1/Atm/Wdr59/Mios/Akt1/Nlk/C9orf72/Ywhaz/Ube2d1/Rnf167/Spaar/Kptn/Prkaa2/Clec16a/Stk11/Pim1/Telo2/Prkaa1/Klhl22/Prkaca/Akt1s1/Itfg2/Tbk1/Ube2w/Depdc5	36
GO:0055013	cardiac muscle cell development	0.00832149	0.369369	4.1339e-07	2.0534e-06	Pi16/Col14a1/Adrb1/Xirp1/Rgs4/Nr3c1/Cxadr/Bmp4/Bmpr1a/Actc1/Tbx5/Hdac2/Sgcd/Nrap/Camk2d/Lmna/Csrp3/Akap6/Lrrc10/Lrrc27/Zmpste24/Slc25a4/Bves/Trip10/Ctdp1/Atg5/Large1/Alpk2/Cav3/Myh10/Sirt1/Nebl/Fhl2/Agt/Igf1/Sgcb/Naglu/Slc8a1/Sorbs2/Actn2/Neb	41
GO:0022408	negative regulation of cell-cell adhesion	0.0131926	0.311005	4.202e-07	2.08389e-06	H2-Aa/Cd74/Pik3r1/Myadm/Wnk1/Bcl6/Twsg1/Dusp3/Il4ra/Trpv4/Cxcl12/Ppm1f/Bmp4/Adora2a/Bmp6/Socs5/Il20rb/Ass1/Pla2g5/Rgcc/Gpnmb/Casp3/Prkcd/Cd276/Cblb/Pde5a/Tgfb1/Swap70/Glmn/Dusp22/Ripor2/Tnfrsf21/Abca12/Akt1/Lgals3/Cbfb/Map2k1/Zc3h8/Smad7/Zfp608/Cd274/Hlx/Ptk2/Gtpbp4/Mad2l2/Zbtb7b/Ptpn6/Irf1/Erbb2/Lrrc32/Vsir/C1qtnf1/Tnfaip3/Cd24a/Mia3/Pag1/Ccm2l/Prnp/Ctla4/Epb41l5/Nckap1l/Cd9/Loxl3/Lgals9/Peli1	65
GO:0048662	negative regulation of smooth muscle cell proliferation	0.00629186	0.418919	4.34351e-07	2.15064e-06	Cdkn1a/Apod/Ogn/Pik3r1/Apln/Igfbp3/Hmox1/Igfbp5/Comt/Timp3/Cav1/Nppb/Trp53/Apoe/Efemp2/Sf1/Trib1/Il15/S1pr2/Mef2c/Tgfb3/Ndrg2/Ndrg4/Agt/Ptgir/Ace2/Ppargc1a/Tnfaip3/Rhoa/Gstp2/Sod2	31
GO:0070059	intrinsic apoptotic signaling pathway in response to endoplasmic reticulum stress	0.00588593	0.432836	4.42678e-07	2.18839e-06	Bcl2l1/Herpud1/Serinc3/Lrrk2/Atf4/Hyou1/Grina/Trp53/Casp3/Nck1/Tmem117/Bok/Bcl2/Creb3l1/Txndc12/Bak1/Nck2/Opa1/Bag6/Prkn/Sirt1/Ero1a/Creb3/Selenok/Xbp1/Selenos/Itpr1/Ddit3/Dab2ip	29
GO:1904950	negative regulation of establishment of protein localization	0.0105541	0.335484	4.47152e-07	2.207e-06	Apod/Pim3/Ptpn11/Lrrk2/Fbn1/Inpp5k/Midn/Pkia/Ppm1f/Pfkl/Tbc1d1/Os9/Cd200/Kcnj11/Bag3/Kcnb1/Cyp51/Apoe/Cabp1/Csk/Coro2b/Ogt/Dnaja1/Ube2g2/Rest/Sfrp1/Svip/Pde3b/Rhbdf1/Idh2/Angpt1/Prkn/Sirt4/Ndfip2/Pde8b/Wwp2/Rab11fip5/Dmtn/Ubac2/Rab23/Srebf1/Hmgcr/Nr1h3/Erlec1/Rhbdf2/Klf7/Mdfic/Jagn1/Ube2j1/Ndufaf2/Mapt/Nf1	52
GO:0071897	DNA biosynthetic process	0.0119748	0.320652	4.51795e-07	2.22165e-06	Cdkn1a/Lox/Ccn2/Cyp1b1/Smoc2/Jade2/Ankrd1/Sphk1/Gja1/Pola1/Kcnk2/Dusp1/Hnrnpa2b1/Dach1/Rgcc/Fgf2/Trp53/Dcp2/Myc/Tfdp1/Rev1/Camk2d/Atm/Ptk2b/Tk1/Tk2/Mcrs1/Arrb2/Ten1/Hnrnpc/Lig4/Cdkn2d/Dkc1/Lig3/Nat10/Poln/Parp4/Sprtn/Sirt1/Nek7/Nvl/Mad2l2/Parn/Pole/Stn1/Tnks/C3ar1/Wrn/Telo2/Parp10/Gnl3l/Terf2/Nhp2/Polk/Cct6a/Rfc5/Map3k4/Rrm1/Pot1a	59
GO:0014896	muscle hypertrophy	0.00893038	0.357724	4.52265e-07	2.22165e-06	Pi16/Myh7/Col14a1/Adrb1/Trim63/Klf15/Errfi1/Rgs4/Nr3c1/Trpc3/Bmp4/Igfbp5/Prkca/Mir208b/Gata6/Nppb/Jarid2/Ece1/Fbxo32/Camk2d/Lmna/Mtpn/Parp1/Pde5a/Csrp3/Akap6/Nppa/Slc25a4/Mef2c/Trip10/Cdk9/Ctdp1/Ptk2/Cav3/Sirt1/Agt/Igf1/Rap1gds1/Smad3/Sorbs2/Rock2/Mlip/Smad1/Ar	44
GO:0043401	steroid hormone mediated signaling pathway	0.00893038	0.357724	4.52265e-07	2.22165e-06	Heyl/Ddrgk1/Fkbp4/Dab2/Prmt2/Nr3c1/Vps11/Klf9/Bmal1/Per1/Bdnf/Kdm3a/Cry2/Calr/Tcf21/Calcoco1/Crebrf/Dnaja1/Wbp2/Nr3c2/Parp1/Sfrp1/Trerf1/Esrrb/Yap1/Daxx/Safb/Ddx17/Ywhah/Sirt1/Safb2/Igf1/Carm1/Kdm5d/Abhd2/Cry1/Cnot9/Kdm4c/Rhoa/Strn3/Med1/Ufsp2/Ar/Hdac1	44
GO:0150076	neuroinflammatory response	0.00690075	0.4	4.58004e-07	2.24276e-06	Ifngr2/Clu/Ctsc/Sphk1/Lrrk2/Nr3c1/Adcy1/Adora2a/Nampt/Cd200/Plcg2/Csf1r/Nr1d1/Smo/Atm/Tlr3/Tyrobp/Zeb2/Large1/Hspa4/Agt/Cx3cl1/Kcnj8/Igf1/Naglu/Il33/Ldlr/Tlr2/Dagla/Itgb1/Jun/Egfr/Pomt2/Syt11	34
GO:1901796	regulation of signal transduction by p53 class mediator	0.00690075	0.4	4.58004e-07	2.24276e-06	Cd74/Ankrd1/Steap3/Hic1/Ubb/Spred2/Cdk5rap3/Pla2r1/Mlf1/Trp53/Nop53/Eef1e1/Myc/Atm/Pcbp4/Zmpste24/Spred1/Rrs1/Dyrk1a/Mdm2/Snai2/Prkn/Sirt1/Psmd10/Rpl37/Bmyc/Kmt5a/Rpl37rt/Pttg1ip/Triap1/Rps20/Trim24/Armc10/Msx1	34
GO:0033044	regulation of chromosome organization	0.0148163	0.29918	4.59215e-07	2.24515e-06	Actb/Mcm2/Dync1li1/Hecw2/Smc2/Actr8/Ncapd2/Hnrnpa2b1/Ercc1/Ino80c/Dcp2/Myc/Nfrkb/Dhx36/Uchl5/Smarcb1/Bcl7c/Lmna/Parp1/Smg1/Gnl3/Atm/Xrcc3/Xrcc1/Cdc23/Smarca5/Bcl7b/Mcrs1/Resf1/Ten1/Hnrnpc/Nabp2/Ruvbl2/Lig4/Dkc1/Nat10/Ppp1r10/Tnks2/Morc2a/Sirt1/Zwint/Baz1b/Nek7/Cdc27/Ik/Parn/Rad21/Anapc7/Mad2l1/Bmyc/Pbrm1/Actr5/Stn1/Chfr/Terf2ip/Slf1/Tnks/Gnl3l/Terf2/Tasor/Mre11a/Brd7/Cct6a/Map3k4/Klhl22/Arid1b/Cd…	73
GO:0050684	regulation of mRNA processing	0.00974224	0.345324	4.66599e-07	2.27767e-06	Cirbp/Rbm3/Adarb1/Hnrnpa2b1/Prpf19/Larp7/Dhx36/Tra2a/Sf1/Papola/Rbfox1/Nsrp1/Rest/Leo1/Pcbp4/Srsf9/Safb/Cdk9/Dyrk1a/Khdrbs1/Srrm4/Fxr2/Srsf6/Srsf7/Ddx17/Dazap1/Obi1/Srpk1/Hnrnpl/Tia1/Safb2/Srrm1/Rbmxl1/Rbm7/Paf1/Snw1/Sfswap/Snrnp70/C1qbp/Fxr1/Sap18b/Rnps1/Dhx9/Ythdc1/Malat1/Ptcd2/Nova1/Thrap3	48
GO:0006383	transcription by RNA polymerase III	0.00466816	0.489362	4.75062e-07	2.31535e-06	Ell/Brf1/Dhx36/Gtf3c5/Tbp/Maf1/Smarca5/Gtf3c1/Polr3d/Zc3h8/Ice2/Baz1b/Snapc1/Polr3k/Myo1c/Gtf3c4/Polr3h/Snapc3/Gtf3c3/Ar/Polr3gl/Polr3e/Snapc4	23
GO:0030705	cytoskeleton-dependent intracellular transport	0.0133956	0.308411	4.81971e-07	2.34168e-06	Tuba1a/Ift122/Myrip/Myo1b/Armcx3/Kif5c/Ift81/Intu/Sybu/Dynll1/Ubb/Ift80/Ttc21b/Map1b/Sod1/Myo1e/Rab21/Trak2/Syne2/Kxd1/Ift20/Mecp2/Dtnbp1/Ift70a1/Hook2/Arhgap21/Ap3b1/Cep131/Ssx2ip/Cdc42/Map2k1/Uchl1/Myo1d/Ift46/Bicd2/Cilk1/Lca5/Ift70b/Bloc1s5/Hook3/Borcs7/Wdr35/Myo1c/Map6/Ift43/Stk11/Ift74/Trak1/Dync2li1/Ift57/Borcs6/Arl8a/Ift140/Terf2/Bbs1/Myo6/Ccdc88c/Kif3a/Arl3/Ccdc88a/Mapt/Spg7/Myo5b/Ap3d1/T…	66
GO:0051648	vesicle localization	0.0133956	0.308411	4.81971e-07	2.34168e-06	Bcl2l1/Syn2/Rab27a/Myrip/Myo1b/Clasp1/Lrrk2/Steap3/Dipk2a/Kif5c/Sybu/Rab7/Pcdh17/Myo1e/Ap1s2/Picalm/Trak2/Sar1a/Dnm3/Exoc4/Mecp2/Clasp2/Dtnbp1/Trappc2/Trip11/Tcirg1/Ap3b1/Arfgap3/Map4k2/Map2k1/Shroom2/Dctn2/Dctn1/Myo1d/Gbf1/Rab3a/Prkn/Pdcd6/Chmp2a/Snap91/Bloc1s5/Naglu/Myo1c/Stard3nl/Stk11/Dnm1/Trak1/Cdh2/Cops5/Mapk8/Myo6/Klhl12/Trappc13/Ykt6/Myo5b/Syt11/Trappc3/Trappc1/Ap3d1/Cep19/Tcf7l2/Trappc8/…	66
GO:2000116	regulation of cysteine-type endopeptidase activity	0.0146134	0.3	4.88789e-07	2.3711e-06	Ccn2/Xdh/Herpud1/Ret/Perp/Lgmn/Ppm1f/Fas/Ngf/Adora2a/Dpep1/Hspd1/Casp8/Dap/Xiap/Cflar/Acer2/Pdcd5/Myc/Tfap4/Aqp1/Thbs1/Dnaja3/Sox7/Rest/Bok/Mical1/Sfn/Akt1/Arrb2/Cycs/Bak1/Epha7/Cdkn2d/Uaca/Mdm2/Stat1/Sirt1/Col4a3/Hip1r/Pdcd6/Fyn/Igf1/Sh3rf1/Wdr35/Asph/Dnajb6/Fis1/Bmyc/Mrtfa/Rps6ka1/Bcl2l11/Mapk9/Tnfsf10/Fam162a/Ift57/Hip1/Smad3/Gpi1/Card9/Arl6ip5/Arrb1/Gas6/Mul1/Mtch1/Triap1/Casp2/Rps27l/Rhoa/Rn…	72
GO:0010596	negative regulation of endothelial cell migration	0.00527704	0.45614	4.98697e-07	2.4154e-06	Adamts9/Meox2/Serpinf1/Vash1/Patz1/Rgcc/Fgf2/Dll4/Synj2bp/Apoe/Thbs1/Mecp2/Tgfb1/Spred1/Slit2/Stard13/Mef2c/Angpt2/Csnk2b/Stc1/Dcn/Rhoa/Krit1/Mmrn2/Gadd45a/Dab2ip	26
GO:0051650	establishment of vesicle localization	0.0123808	0.316062	5.08471e-07	2.45891e-06	Rab27a/Myrip/Myo1b/Clasp1/Lrrk2/Steap3/Dipk2a/Kif5c/Sybu/Rab7/Myo1e/Ap1s2/Picalm/Trak2/Sar1a/Dnm3/Exoc4/Mecp2/Clasp2/Dtnbp1/Trappc2/Trip11/Tcirg1/Ap3b1/Arfgap3/Map4k2/Map2k1/Shroom2/Dctn2/Dctn1/Myo1d/Gbf1/Rab3a/Prkn/Pdcd6/Chmp2a/Snap91/Bloc1s5/Naglu/Myo1c/Stard3nl/Stk11/Dnm1/Trak1/Cops5/Mapk8/Myo6/Klhl12/Trappc13/Ykt6/Myo5b/Syt11/Trappc3/Trappc1/Ap3d1/Cep19/Trappc8/Tanc2/Exoc2/Sec16a/Exoc8	61
GO:0007224	smoothened signaling pathway	0.011163	0.327381	5.18732e-07	2.50463e-06	Tuba1a/Ift122/Gas1/Tubd1/Cc2d2a/Rpgrip1l/Ift81/Intu/Hipk1/Fgfr3/Ift80/Ttc21b/Ext1/Cdon/Prrx1/Tbc1d32/Hspg2/Cenpj/Tgfbr2/2700049A03Rik/Bbs7/Kctd6/Disp1/Uchl5/Ift20/C2cd3/Smo/Sfrp1/Rora/Ttc23/Ttbk2/Fgf9/Mgrn1/Ift46/Ctnna1/Glis2/Pdcl/Arl6/Ptch1/Chsy1/Ift57/Rab23/Ift140/Rab34/Kctd11/Cdk20/Arl13b/Prkaca/Cfap410/Kif3a/Gpr161/Arl3/Tedc2/Dzip1l/Fkbp8	55
GO:0006749	glutathione metabolic process	0.00568297	0.4375	5.32623e-07	2.56772e-06	Gsta3/Mgst1/Gstm1/Mmachc/Chac2/Dpep1/Gsta4/Oplah/Cth/Sod1/Gpx3/Gclm/Gss/Hmgn5/Gstm2/Gsr/Glo1/Gclc/Gpx4/Arl6ip5/Gstz1/Gstt1/Nfe2l1/Gstt2/Gstp2/Ethe1/Sod2/Gpx1	28
GO:0042593	glucose homeostasis	0.0172519	0.285235	5.33572e-07	2.56831e-06	Pik3r1/Pim3/Adgrf5/Klf15/Fabp5/Vcam1/Sesn3/Stxbp4/Ptpn11/Prcp/Ptprn/Trpv4/Fbn1/Crtc2/Inpp5k/Myh9/Foxo3/Igfbp5/Aspscr1/Tbc1d1/Sybu/Dynll1/Alox5/Cry2/Oxct1/Adipor2/Cyb5r4/Kcnb1/Fosl2/Nr1d1/Ogt/Smarcb1/Bace2/Insr/Camk2n1/Pde3b/Csrp3/Ankrd26/Igf1r/Mcu/Abca12/Akt1/Zbtb20/Rph3al/Pdk2/Dmxl2/Gk/Oas1b/Sidt2/Cav3/Appl2/Prkn/Sirt1/Prkaa2/Pde8b/Abcg1/Igf1/Sgcb/Rab11fip5/Ptch1/Stk11/Xbp1/Zbed6/Rab34/Hmgcr/Gpi…	85
GO:0008643	carbohydrate transport	0.0107571	0.33125	5.477e-07	2.63224e-06	Pea15a/Klf15/Fabp5/Stxbp4/Ptpn11/Inpp5k/Aqp7/Slc37a2/Mfsd2b/Aspscr1/Grb10/Prkca/Adipor2/C1qtnf2/Appl1/Osbpl8/Slc2a8/Ace/Slc50a1/Sorbs1/Myc/Aqp1/Slc2a12/Prkcd/Irs2/Slc35b4/Insr/Slc35a3/Tsc1/Slc45a3/Aoc3/Akt1/Slc35a1/Slc26a6/Slc35d2/C2cd5/Slc37a3/Appl2/Rhoq/Igf1/Sgcb/Slc2a1/Rasa1/Mapk14/Slc27a1/Capn10/Rnasel/Mfsd4b1/Pid1/Erbb3/Slc27a4/Crebl2/Tmem144	53
GO:0035269	protein O-linked mannosylation	0.00243556	0.75	5.50446e-07	2.64135e-06	Tmtc2/Tmtc1/Tmtc4/Fktn/Pomt1/Dpm1/Tmtc3/Large1/Rxylt1/Fkrp/Pomgnt2/Pomt2	12
GO:0032088	negative regulation of NF-kappaB transcription factor activity	0.00669779	0.402439	5.69728e-07	2.72128e-06	Cyp1b1/Prmt2/Lrrk2/Nfkbia/Dap/Irak3/Cd200/Cdk5rap3/Nfkbib/Dnaja3/Anxa4/Chuk/Arrb2/Traf3/Otulin/Ptgis/Sirt1/Psmd10/Mturn/Tax1bp1/Pias4/Tnfaip3/Parp10/Arrb1/Erbin/Bcl3/Irak1/Brms1/Ddit3/Commd1/Commd7/Dab2ip/Peli1	33
GO:0051145	smooth muscle cell differentiation	0.00669779	0.402439	5.69728e-07	2.72128e-06	Tmsb4x/Bmp4/Tmem204/Ramp2/Gata6/Cth/Cfh/Nfatc2/Efemp2/Dnmt1/Mecp2/Mrtfb/Tgfb1/Zeb1/Fgf9/Mef2c/Ednrb/Tshz3/Sirt1/Agt/Rbpms2/Pias1/Sgcb/Mrtfa/Pbrm1/Nfatc4/Adm/Acvr1/Tbx2/Ntf3/Rcan1/Med28/Sod2	33
GO:0051149	positive regulation of muscle cell differentiation	0.00669779	0.402439	5.69728e-07	2.72128e-06	Lmod3/Tmsb4x/Adrb1/Nid1/Nr3c1/Bmp4/Cyp26b1/Lamb1/Cth/Efnb2/Mmp14/Efemp2/Lamc1/Csrp3/Akap6/Bcl2/Tgfb1/Slc25a4/Arrb2/Mef2c/Trip10/Lama2/Tshz3/Mdm2/Cav3/Mamstr/Sirt1/Pias1/Igf1/Camk1/Mapk14/Smyd1/Sod2	33
GO:0003206	cardiac chamber morphogenesis	0.0103511	0.335526	5.71508e-07	2.7256e-06	Myh7/Sema3c/Heyl/Ppp1r13l/Nrp1/Nrp2/Wnt5a/Gja5/Bmp4/Bmpr1a/Gata6/Cited2/Tbx5/Dll4/Slit3/Trp53/Wnt11/Tgfbr2/Parva/Chd7/Tnnt2/Smo/Fzd2/Tgfb1/Heg1/Nsd2/Tek/Slit2/Fgf9/Mef2c/Tgfb2/Smad7/Mdm2/Cav3/Cpe/Fhl2/Ly6e/Naglu/Epor/Ccm2l/Rnls/Acvr1/Fkbp1a/Tbx2/Sos1/Pkp2/Ptcd2/Med1/Zfpm2/Tgfbr3/Tbx20	51
GO:0055006	cardiac cell development	0.00872742	0.358333	5.76055e-07	2.74307e-06	Pi16/Col14a1/Adrb1/Xirp1/Rgs4/Nr3c1/Cxadr/Bmp4/Bmpr1a/Actc1/Tbx5/Hdac2/Sgcd/Nrap/Camk2d/Lmna/Csrp3/Akap6/Lrrc10/Lrrc27/Zmpste24/Slc25a4/Bves/Trip10/Ctdp1/Atg5/Large1/Alpk2/Cav3/Myh10/Sirt1/Nebl/Fhl2/Agt/Igf1/Sgcb/Naglu/Pbrm1/Slc8a1/Sorbs2/Actn2/Tgfbr3/Neb	43
GO:0002262	myeloid cell homeostasis	0.0133956	0.306977	5.80648e-07	2.75206e-06	Gata2/Ets1/Bcl6/Adgrf5/Adam17/Itpkb/Ldb1/Hmox1/Jam3/Pde4b/Foxo3/Bmp4/Alas1/Ccr2/Cdk5rap3/Cited2/Cflar/Sod1/Mertk/Cfh/Tspan9/Csf1r/Prdx1/Zfp36/Sox6/Casp3/Csf1/Lyn/Tmem14c/Tmod3/P4htm/Bak1/Cdk6/Setd1a/Abcb10/Adar/Cebpg/Stat1/Prmt1/Bcl2l11/Acvr2a/Dmtn/Heatr3/Mapk14/Epas1/Cd24a/Rcor1/Gpi1/Ankrd54/Stat5a/Brd1/Gas2l1/Fancc/Rps14/L3mbtl3/Slc25a40/Slc25a38/Thra/Nfe2l1/Nckap1l/Lyar/Med1/Nf1/Tgfbr3/Hmga1/C…	66
GO:0051236	establishment of RNA localization	0.0101482	0.337838	5.80892e-07	2.75206e-06	Wnk1/Ncbp2/Peg10/Xpo1/Akap8l/Kif5c/Ndc1/Nup35/Hnrnpa2b1/Tgfbr2/Zfp36/Pnpt1/Parp11/Lrpprc/Nxt2/Tsc1/Nsun2/Atm/Rftn1/Phax/Tomm20/Sidt2/Khdrbs1/Cpeb1/Xpo5/Srsf7/Bicd2/Mrpl18/Gle1/Rftn2/Mcm3ap/Nrde2/Zc3h11a/Tnks/Igf2bp2/Srsf1/Hhex/Slbp/Zc3h3/Dhx9/Cetn2/Ythdc1/Nup210/Cetn3/Hnrnpa1/Mapt/Nup37/Aaas/Casc3/Thoc3	50
GO:0002042	cell migration involved in sprouting angiogenesis	0.00507408	0.462963	5.81483e-07	2.75206e-06	Hdac9/Gata2/Kdr/Nrp1/Meox2/Hmox1/Fgf2/Dll4/Efnb2/Srpx2/Thbs1/Fbxw7/Plk2/Akt1/Spred1/Slit2/Stard13/Akt3/Mia3/Rhoj/Itgb1/Ephb4/Rhoa/Pik3r3/Mmrn2	25
GO:0003179	heart valve morphogenesis	0.00507408	0.462963	5.81483e-07	2.75206e-06	Emilin1/Heyl/Scx/Adamts9/Dchs1/Eln/Gja5/Bmp4/Bmpr1a/Tbx5/Dll4/Slit3/Tgfbr2/Tgfb1/Slit2/Mef2c/Tgfb2/Mdm2/Efna1/Naglu/Acvr1/Tie1/Rhoa/Zfpm2/Tbx20	25
GO:0006888	endoplasmic reticulum to Golgi vesicle-mediated transport	0.00893038	0.354839	5.85994e-07	2.7692e-06	Whamm/Gas1/Lrrk2/Kdelr3/Sec24d/Pgap1/Sec23a/Hyou1/Lman2l/Mia2/Sec22c/Lman1/Tbc1d20/Steep1/Cnih4/Sar1a/Kdelr2/Lman2/Use1/Trappc2/Trip11/Golga2/Yipf6/P4hb/Yipf7/Pdcd6/Sec23b/Copb1/Ergic2/Mia3/Trappc2b/Klhl12/Golt1b/Lmf1/Sec22b/Yipf4/Trappc13/Ykt6/Sec31a/Trappc3/Trappc1/Trappc8/Tmed3/Sec16a	44
GO:0070266	necroptotic process	0.00405927	0.526316	5.94131e-07	2.80339e-06	Ybx3/Fas/Casp8/Ppif/Cav1/Cflar/Trp53/Mlkl/Casp6/Parp1/Rnf31/Bok/Tlr3/Slc25a4/Itpk1/Ripk3/Dnm1l/Adprs/Trpm7/Peli1	20
GO:0044782	cilium organization	0.0225289	0.26555	6.06765e-07	2.85867e-06	Ift122/Mkks/Ehd2/Nek1/Cc2d2a/Ehd4/Cfap43/Cep128/Rpgrip1l/Kctd17/Ift81/Intu/Tbc1d31/Odf2/Dynll1/Ift80/Ttc21b/Ccdc28b/Cep97/Tbc1d32/Sdccag8/Crocc/Clcn4/Cenpj/Dnaaf3/Fam149b/Parva/Ehd1/2700049A03Rik/Bbs7/Syne2/Odf2l/Septin6/Ift20/C2cd3/Lpar1/Cntrob/Atmin/Pcnt/Alpk1/Ift70a1/Ttc12/Cep131/Ssx2ip/Akt1/Flna/Yap1/Ttbk2/Dctn1/Ocrl/Armc2/Wdr90/Ift46/Atg5/Ubxn10/Fbf1/Lama5/Cilk1/Lca5/Nectin2/Tchp/Dnal1/Pfn4/…	111
GO:0045637	regulation of myeloid cell differentiation	0.0144104	0.299578	6.19574e-07	2.9146e-06	Lox/Cd74/Pik3r1/Gata2/Ets1/Ninj1/Itpkb/Ldb1/Zbtb16/Fbn1/Foxo3/Fas/Fgfr3/Zbtb46/Nfkbia/Casp8/Prkca/Tmem64/Creb1/Csf1r/Zfp36/Myc/Csf1/Lyn/Sfrp1/Leo1/Fbxw7/Tgfb1/Trib1/Ptk2b/Dll1/Traf6/Tyrobp/Prdm16/P4htm/Cdk6/Setd1a/Mef2c/Abcb10/Eif6/Klf10/Stat1/Prmt1/Ctr9/Pithd1/Mturn/Bmyc/Tfe3/Nedd9/Acvr2a/Fstl3/Mapk14/Rcor1/Ankrd54/Stat5a/Paf1/Rassf2/Brd1/Gas2l1/Gnas/Jun/Tesc/Hmgb3/Nckap1l/Med1/Rara/Nf1/Tob2/Hax…	71
GO:0006403	RNA localization	0.0113659	0.323699	6.21053e-07	2.91714e-06	Wnk1/Ncbp2/Peg10/Xpo1/Akap8l/Kif5c/Ndc1/Nup35/Hnrnpa2b1/Dcp2/Tgfbr2/Zfp36/Pnpt1/Parp11/Lrpprc/Dhx36/Nxt2/Tsc1/Nsun2/Atm/Rftn1/Phax/Tomm20/Prpf6/Dkc1/Sidt2/Khdrbs1/Cpeb1/Xpo5/Srsf7/Bicd2/Mrpl18/Gle1/Parn/Rftn2/Mcm3ap/Nrde2/Zc3h11a/Tnks/Igf2bp2/Srsf1/Hhex/Slbp/Zc3h3/Dhx9/Cetn2/Ythdc1/Nup210/Cetn3/Hnrnpa1/Mapt/Nup37/Aaas/Znhit6/Casc3/Thoc3	56
GO:0033500	carbohydrate homeostasis	0.0172519	0.284281	6.22101e-07	2.91766e-06	Pik3r1/Pim3/Adgrf5/Klf15/Fabp5/Vcam1/Sesn3/Stxbp4/Ptpn11/Prcp/Ptprn/Trpv4/Fbn1/Crtc2/Inpp5k/Myh9/Foxo3/Igfbp5/Aspscr1/Tbc1d1/Sybu/Dynll1/Alox5/Cry2/Oxct1/Adipor2/Cyb5r4/Kcnb1/Fosl2/Nr1d1/Ogt/Smarcb1/Bace2/Insr/Camk2n1/Pde3b/Csrp3/Ankrd26/Igf1r/Mcu/Abca12/Akt1/Zbtb20/Rph3al/Pdk2/Dmxl2/Gk/Oas1b/Sidt2/Cav3/Appl2/Prkn/Sirt1/Prkaa2/Pde8b/Abcg1/Igf1/Sgcb/Rab11fip5/Ptch1/Stk11/Xbp1/Zbed6/Rab34/Hmgcr/Gpi…	85
GO:0007229	integrin-mediated signaling pathway	0.0077126	0.376238	6.31819e-07	2.95432e-06	Col3a1/Itga6/Ccn2/Itga9/Itga1/Nrp1/Ptpn11/Nid1/Dab2/Fn1/Lamb1/Itgbl1/Vav3/Fut8/Thy1/Cd63/Plpp3/Lamc1/Ptk2b/Itgav/Itgb5/Itga5/Cdc42/Flna/Tyrobp/Lama2/Tec/Sema7a/Lims1/Lims2/Ptpra/Ctnna1/Ptk2/Lama5/Pxn/Itgb1/Rhoa/Loxl3	38
GO:0090100	positive regulation of transmembrane receptor protein serine/threonine kinase signaling pathway	0.0077126	0.376238	6.31819e-07	2.95432e-06	Kdr/Twsg1/Adam17/Lrg1/Dab2/Bmp4/Bmp6/Sulf1/Bmpr1a/Tgfb1i1/Flcn/Gata6/Cited2/Furin/Synj2bp/Tgfbr2/Thbs1/Got1/Parp1/Kcp/Tgfb1/Zeb2/Fgf9/Tgfb3/Crebbp/Csnk2b/Stk11/Vsir/Acvr2a/Snw1/Acvr1/Zc3h3/Numa1/Msx1/Tgfbr3/Fkbp8/Lgals9/Tbx20	38
GO:0043407	negative regulation of MAP kinase activity	0.00548001	0.442623	6.37242e-07	2.9752e-06	Inpp5k/Spry4/Irak3/Dusp1/Cdk5rap3/Cav1/Apoe/Aida/Dnaja1/Prkcd/Lyn/Fem1a/Sfrp1/Dusp10/Nppa/Uchl1/Inppl1/Cav3/Agt/Ptpn6/Dusp16/Hmgcr/Mapk8ip1/Smpd1/Gstp2/Nf1/Dab2ip	27
GO:0017148	negative regulation of translation	0.0135985	0.304545	6.59405e-07	3.07407e-06	Eif4ebp1/Limd1/Mettl16/Tnrc6a/Caprin1/Igfbp5/Prkca/Ago4/Tob1/Dcp2/Calr/Eif4e/Pcif1/Zfp36/Pan2/Rida/Pnpt1/Dhx36/Eprs1/Ifrd2/Trim3/Exosc5/Tsc1/Malsu1/Ybx2/Eif6/Cpeb1/Mettl3/Wtip/Fxr2/Mrpl13/Ajuba/Tnrc6c/Hnrnpr/Tia1/Eif4ebp2/Parn/Ago3/Zfp36l2/Plekhn1/Noct/Srp9/Trim2/Caprin2/Igf2bp2/Otud6b/Mettl14/Samd4/Lsm14a/Enc1/Map3k20/Exosc2/Rock2/Fxr1/Eif4enif1/Cnot9/Dhx9/Zfp598/Tardbp/Cnot8/Ddx6/Cnot10/Rara/Yt…	67
GO:1900180	regulation of protein localization to nucleus	0.01096	0.327273	6.62797e-07	3.08526e-06	Apod/Tfrc/Pik3r1/Glul/Pkia/Bmp4/Ipo7/Dclk1/Lzts2/Cdk5rap3/Flcn/Bag3/Zpr1/Cabp1/Larp7/Ogt/Cd2ap/Prkcd/Smo/Cav2/Lmna/Parp1/Tgfb1/Epm2a/Mcrs1/Tek/Akt1/Flna/Yap1/Jak1/Tgfb2/Angpt1/Ywhaz/Uaca/Ctnna1/Glis2/Ipo5/Sirt1/Nvl/Crebbp/Fyn/Mark3/Stk11/Xbp1/Mapk14/Rab23/Tmem98/Ppp3cb/Dmap1/Mdfic/Tardbp/Nf1/Tcf7l2/Polr1a	54
GO:0090263	positive regulation of canonical Wnt signaling pathway	0.00811853	0.366972	6.92538e-07	3.21888e-06	Col1a1/Wnk1/Lrrk2/Bmal1/Csnk1e/Ppp2r3a/Fgfr3/Xiap/Ttc21b/Cav1/Fgf2/Wnk2/Sfrp1/Usp34/Wls/Fam53b/Tgfb1/Yap1/Zeb2/Fgf9/Sema5a/Bambi/Tnks2/Dact1/Rnf220/Rnf146/Tnks/Caprin2/Eda/Smad3/Lrrk1/Hhex/Reck/Sulf2/Gskip/Thra/Adgra2/Egfr/Frat1/Amer1	40
GO:0003300	cardiac muscle hypertrophy	0.00852446	0.358974	7.33687e-07	3.40505e-06	Pi16/Myh7/Col14a1/Adrb1/Trim63/Klf15/Errfi1/Rgs4/Nr3c1/Trpc3/Bmp4/Prkca/Mir208b/Gata6/Nppb/Jarid2/Ece1/Fbxo32/Camk2d/Lmna/Mtpn/Parp1/Pde5a/Csrp3/Akap6/Nppa/Slc25a4/Mef2c/Trip10/Cdk9/Ctdp1/Ptk2/Cav3/Sirt1/Agt/Igf1/Rap1gds1/Smad3/Sorbs2/Rock2/Mlip/Smad1	42
GO:0006282	regulation of DNA repair	0.0131926	0.306604	7.38298e-07	3.42134e-06	Actb/Polq/Actr8/Morf4l1/Ube2n/Shld1/Tigar/Ino80c/Nfrkb/Mms19/Rnf169/Tada3/Uchl5/Smarcb1/Bcl7c/Parp1/Suv39h1/Xrcc1/Bcl7b/Rpa2/Nsd2/Mcrs1/Hdgfl2/Timeless/Ruvbl2/Cdk9/Atrip/Epc2/Smchd1/Sf3b3/Cebpg/Taf6/Sirt1/Mad2l2/Ube2v2/Sirt7/Trp53bp1/Taf2/Kmt5a/Rad52/Pbrm1/Brcc3/Actr5/Pias4/Eya2/Rif1/Terf2ip/Slf1/Tada2b/Supt7l/Actr2/Dmap1/Brd7/Babam2/Atxn7/Dhx9/Arid1b/Tfpt/Egfr/Uimc1/Mrgbp/Pot1a/Wdr48/Prkcg/Fbh1	65
GO:0050657	nucleic acid transport	0.0099452	0.337931	7.42486e-07	3.43052e-06	Wnk1/Ncbp2/Peg10/Xpo1/Akap8l/Kif5c/Ndc1/Nup35/Hnrnpa2b1/Tgfbr2/Zfp36/Pnpt1/Parp11/Lrpprc/Nxt2/Tsc1/Nsun2/Rftn1/Phax/Tomm20/Sidt2/Khdrbs1/Cpeb1/Xpo5/Srsf7/Bicd2/Mrpl18/Gle1/Rftn2/Mcm3ap/Nrde2/Zc3h11a/Tnks/Igf2bp2/Srsf1/Hhex/Slbp/Zc3h3/Dhx9/Cetn2/Ythdc1/Nup210/Cetn3/Hnrnpa1/Mapt/Nup37/Aaas/Casc3/Thoc3	49
GO:0050658	RNA transport	0.0099452	0.337931	7.42486e-07	3.43052e-06	Wnk1/Ncbp2/Peg10/Xpo1/Akap8l/Kif5c/Ndc1/Nup35/Hnrnpa2b1/Tgfbr2/Zfp36/Pnpt1/Parp11/Lrpprc/Nxt2/Tsc1/Nsun2/Rftn1/Phax/Tomm20/Sidt2/Khdrbs1/Cpeb1/Xpo5/Srsf7/Bicd2/Mrpl18/Gle1/Rftn2/Mcm3ap/Nrde2/Zc3h11a/Tnks/Igf2bp2/Srsf1/Hhex/Slbp/Zc3h3/Dhx9/Cetn2/Ythdc1/Nup210/Cetn3/Hnrnpa1/Mapt/Nup37/Aaas/Casc3/Thoc3	49
GO:0032606	type I interferon production	0.00974224	0.340426	7.5181e-07	3.46845e-06	Irf7/Ptpn11/Pola1/Irf9/Hspd1/Xaf1/Irgm1/Riok3/Sirpa/Ptprs/Plcg2/Dhx36/Nploc4/Garin5a/Ddx56/Chuk/G3bp1/Ap3b1/Tlr3/Trim65/Traf6/Traf3/Zbtb20/Tyrobp/Polr3d/Oas1b/Atg5/Stat1/Polr3b/Sting1/Crebbp/Irf1/Gpatch3/Relb/Tlr2/Rnf125/Rnf216/Tirap/Gbp7/Irak1/Klhl22/Arrdc4/Dhx9/Irf5/Tbk1/Ufd1/Ap3d1/Gapdh	48
GO:0051496	positive regulation of stress fiber assembly	0.00527704	0.448276	7.57468e-07	3.48738e-06	Ccn2/Nrp1/Ppm1f/Synpo2l/Arhgef15/S100a10/Pfn2/Carmil1/Rgcc/Sorbs3/Rhoc/Wnt11/Lpar1/Tsc1/Cdc42/Limch1/Evl/Tgfb3/Rapgef3/Limk1/Pxn/Smad3/Cd47/Rock2/Rhoa/Ccdc88a	26
GO:0030282	bone mineralization	0.00953927	0.343066	7.58158e-07	3.48738e-06	Lox/Col1a2/Pth1r/Tent5a/Ddr2/Alpl/Ahsg/Gpm6b/Rflnb/Tmem38b/Gja1/Sbds/Bmp4/Bmp6/Alox5/Fgfr3/Bmpr1a/Ift80/Atf4/Aspn/Csf1r/Fosl2/Wnt11/Cd276/Sbno2/Suv39h1/Ptk2b/Lncpint/Zmpste24/Mef2c/Srgn/Atraid/Klf10/Mgp/Ank/Fkrp/Igf1/Acvr2a/Slc8a1/Mia3/Smad3/Acvr1/Fam20c/Txlng/Clec3b/Tcf7l2/Atp2b1	47
GO:1901890	positive regulation of cell junction assembly	0.00913335	0.348837	7.60564e-07	3.4897e-06	Pik3r1/Thbs2/Eef2k/Kdr/Cux2/Nrp1/Ptpn11/Myh9/Ppm1f/S100a10/Col16a1/Bdnf/Ephb1/Lrrc4b/Prkca/Tbx5/Cav1/Thy1/Adgrl2/Srpx2/Cfl1/Tsc1/Dlg4/Flrt2/Irx3/Tek/Enpp2/Slit2/Lims1/Adgre5/Agt/Ube2v2/Ptprd/Ace2/Amigo1/Smad3/Iqgap1/Sema4a/Bhlhb9/Epb41l5/Cldn5/Actr3/Adgrl1/Lrtm1/Amigo3	45
GO:0043470	regulation of carbohydrate catabolic process	0.0060889	0.416667	7.62027e-07	3.4897e-06	Aldob/Hsd11b1/Gpd1/Ddit4/Flcn/Tigar/Trp53/Myc/Ogt/Insr/Jmjd8/Esrrb/Zbtb20/Ppp1r3d/Ppp1r3b/Eif6/Mlst8/Slc25a12/Prkaa2/Git1/Igf1/Ppargc1a/Prxl2c/Ppp1ca/Prkaa1/Arl2/Prkaca/Cbfa2t3/Ppp2ca/Slc4a4	30
GO:0071479	cellular response to ionizing radiation	0.0060889	0.416667	7.62027e-07	3.4897e-06	Cdkn1a/Bcl2l1/Ints7/Ccnd2/Egr1/Hus1/Trp53/Sfrp1/Atm/Tgfb1/Zmpste24/Swi5/Yap1/Lig4/Mdm2/Snai2/Sirt1/Tnks1bp1/Xrcc6/Grb2/Brcc3/Mapk14/Wrn/Elk1/Map3k20/Rhob/Babam2/Tlk2/Brca2/Gadd45a	30
GO:0006302	double-strand break repair	0.0170489	0.283784	7.81111e-07	3.57183e-06	Paxx/Actb/Polq/Pola1/Mcm2/Exd2/Rpa3/Actr8/Morf4l1/Ube2n/Shld1/Ercc1/Hus1/Trp53/Xrcc2/Prpf19/Uvrag/Iffo1/Mms19/Rnf169/Smarcb1/Bcl7c/Parp1/Eme2/Mcm7/Dclre1b/Atm/Xrcc3/Xrcc1/Bcl7b/Rpa2/Nsd2/Rbbp8/Swi5/Ddx1/Hdgfl2/Recql/Timeless/Nabp2/Ruvbl2/Lig4/Lig3/Atrip/Epc2/Smchd1/Poln/Sirt1/Tnks1bp1/Mad2l2/Ube2v2/Xrcc6/Rad21/Trp53bp1/Rfwd3/Zswim7/Kmt5a/Rad52/Setx/Pbrm1/Brcc3/Actr5/Pias4/Rif1/Terf2ip/Slf1/Wrn/Rm…	84
GO:0006476	protein deacetylation	0.00568297	0.430769	7.83794e-07	3.57883e-06	Hdac9/Dysf/Fry/Ndn/Spred2/Tppp/Yeats2/Hdac2/Tada3/Suv39h1/Tgfb1/Smarca5/Spred1/Flna/Dyrk1a/Sirt2/Sirt1/Kat14/Sirt4/Prkaa2/Ripk3/Sirt7/Prkaa1/Brms1/Hdac8/Mapt/Mbip/Hdac1	28
GO:0005977	glycogen metabolic process	0.00669779	0.39759	7.91558e-07	3.59843e-06	Gnmt/Pcdh12/Adrb1/Gabarapl1/Inpp5k/Gfpt1/Grb10/Phkg1/Phka1/C1qtnf2/Khk/Nr1d1/Sorbs1/Irs2/Phkb/Insr/Epm2a/Esrrb/Akt1/Ppp1r2/Ppp1r3d/Stk40/Ppp1r3b/Per2/Phka2/Gys1/Igf1/Phkg2/Pgm2/Ppp1ca/Agl/Lepr/Tcf7l2	33
GO:0018394	peptidyl-lysine acetylation	0.00669779	0.39759	7.91558e-07	3.59843e-06	Gata2/Klf15/Crtc2/Morf4l1/Nfya/Brd8dc/Yeats2/Hdac2/Smo/Mecp2/Tgfb1/Smarca5/Atat1/Ruvbl2/Kansl3/Bag6/Sirt1/Kat14/Prkaa2/Baz1b/Msl3/Crebbp/Myo1c/Auts2/Msl1/Kat8/Dmap1/Prkaa1/Kif3a/Hdac8/Phf20/Mrgbp/Hint2	33
GO:0030433	ubiquitin-dependent ERAD pathway	0.00669779	0.39759	7.91558e-07	3.59843e-06	Herpud1/Erlin2/Os9/Fbxo44/Cav1/Edem3/Erlin1/Nrros/Calr/Nploc4/Man1a/Ube2g2/Aup1/Svip/Man1b1/Sgta/Trim13/Jkamp/Ubxn10/Bag6/Ube2j2/Trim25/Dnajb9/Sec61b/Usp14/Erlec1/Selenos/Hsp90b1/Man1c1/Ubqln2/Rnf185/Ube2j1/Ufd1	33
GO:1901874	negative regulation of post-translational protein modification	0.00750964	0.377551	7.98775e-07	3.62594e-06	Wnk1/Sqstm1/Crtap/Dysf/Flcn/Cav1/Rasd2/Gps2/Ogt/Dnaja1/Akt1/Arrb2/Per2/Ubxn1/Smad7/Atg5/Gtpbp4/Gclc/Limk1/Mad2l2/Sirt7/Fyn/Mad2l1/Bag5/Tnfaip3/Klhl40/Parp10/Gnl3l/Arrb1/Prmt3/Cry1/Hdac8/Nxn/Sh3rf2/Prkcg/Pias3/Spopl	37
GO:0032886	regulation of microtubule-based process	0.0156282	0.290566	8.1316e-07	3.68586e-06	Fam107a/Hsph1/Chordc1/Mkks/Trim54/Clasp1/Fkbp4/Trpv4/Xpo1/Dync1li1/Dysf/Cfap43/Spice1/Ttc21b/Cav1/Map1b/Cep97/Nav3/Tppp/Wdr62/Dixdc1/Ccnl2/Cenpj/Gda/Mecp2/Clasp2/Tacc1/Xrcc3/Chmp6/Cep131/Plk2/Apc2/Ripor2/Stmn2/Azin1/Ttbk2/Dctn1/Dyrk1a/Nat10/Cav3/Bicd2/Chmp4b/Sirt1/Prkaa2/Chmp2a/Inpp5j/Phldb2/Macf1/Atf5/Git1/Cltc/Erbb2/Map6/Taok1/Stk11/Stmn1/Mapk8/Chmp1b/Bbs1/Mark4/Gas2l1/Mdm1/Nubp1/Rock2/Prkaa1/A…	77
GO:0043543	protein acylation	0.0105541	0.329114	8.71789e-07	3.94586e-06	Glul/Gata2/Klf15/Sphk1/Crtc2/Bmal1/Zdhhc4/Morf4l1/Naa20/Nfya/Brd8dc/Yeats2/Hdac2/Zdhhc9/Smo/Mecp2/Tgfb1/Smarca5/Atat1/Ruvbl2/Zdhhc21/Nat10/Kansl3/Zdhhc17/Bag6/Sirt1/Kat14/Prkaa2/Baz1b/Msl3/Dlst/Crebbp/Myo1c/Taok1/Auts2/Naa35/Selenok/Xbp1/Msl1/Kat8/Naa50/Dmap1/Zdhhc13/Arid5a/Prkaa1/Dld/Gtf2b/Kif3a/Hdac8/Phf20/Mrgbp/Hint2	52
GO:0043502	regulation of muscle adaptation	0.00791557	0.367925	8.79411e-07	3.97457e-06	Pi16/Myh7/Adrb1/Trim63/Selenon/Errfi1/Rgs4/Nr3c1/Trpc3/Foxo3/Igfbp5/Prkca/Jarid2/Ece1/Gtf2ird2/Fbxo32/Camk2d/Lmna/Mtpn/Parp1/Pde5a/Akap6/Slc25a4/Mef2c/Trip10/Cdk9/Ctdp1/Srl/Ptk2/Cav3/Sirt1/Agt/Igf1/Smad3/Tead1/Rock2/Ndufs4/Gtf2ird1/Mlip	39
GO:0016053	organic acid biosynthetic process	0.0182667	0.277778	8.87795e-07	4.00664e-06	Cd74/Glul/Ptgs1/Akr1c14/Ptgds/Aldh18a1/Hacd1/Fabp5/Errfi1/Sphk1/Ces1d/Decr2/Mtr/Sco1/Uros/Mthfr/Acaca/Aldh1a2/Hacd4/Erlin2/Gatm/Stard4/Alox5/Ass1/Hsd17b10/Pla2g5/Cth/Mgll/Cyp27a1/Dse/Degs1/Asl/Erlin1/Nr1d1/Got1/Lpl/Cad/Asah2/Scd4/Apip/Slc45a3/Sdsl/Amacr/Prkab2/Per2/Plp1/Dhfr/Eif6/Ptgis/Slc25a12/Fmo1/Sirt2/Sirt1/Prkaa2/Pla2g4a/Agt/Mtrr/Ugdh/Mgst3/Tecrl/Lpgat1/Mapk9/Lias/Acacb/Abhd2/Srebf1/Gls/Acss…	90
GO:0090316	positive regulation of intracellular protein transport	0.0101482	0.333333	9.15654e-07	4.12638e-06	Pik3r1/Wipf1/Bag3/Kcnb1/Zpr1/Pdcd5/Sar1a/Prkcd/Smo/Fbxw7/Pcnt/Tgfb1/Cep131/Oaz2/Sfn/Tek/Tm9sf4/Cdc42/Flna/Hspa1l/Tcaf1/Stom/Tcaf2/Uaca/Rapgef3/C2cd5/Mdm2/Ipo5/Fyn/Erbb2/Asph/Camk1/Myo1c/Fis1/Xbp1/Mapk14/Tmem30a/Prnp/Dmap1/Eif3e/Gas6/Prkaa1/Prkaca/Tardbp/Kif3a/Commd1/Ripor1/Actr3/Rab29/Emd	50
GO:1903053	regulation of extracellular matrix organization	0.00548001	0.435484	9.45803e-07	4.25608e-06	Fscn1/Ddr2/Emilin1/Ets1/Clasp1/Nid1/Lamb1/Rgcc/Cflar/Zfp469/Antxr1/Tnxb/Efemp2/Lamc1/Tcf15/Clasp2/Tgfb1/Lama2/Tgfb2/Sema5a/Mad2l2/Agt/Phldb2/Pdpn/Smad3/Tie1/Ric1	27
GO:0030518	intracellular steroid hormone receptor signaling pathway	0.00852446	0.355932	9.52472e-07	4.27372e-06	Heyl/Ddrgk1/Fkbp4/Dab2/Prmt2/Nr3c1/Vps11/Klf9/Bmal1/Per1/Bdnf/Kdm3a/Cry2/Calr/Tcf21/Calcoco1/Dnaja1/Wbp2/Nr3c2/Parp1/Sfrp1/Trerf1/Esrrb/Yap1/Daxx/Safb/Ddx17/Ywhah/Sirt1/Safb2/Igf1/Carm1/Kdm5d/Cry1/Cnot9/Kdm4c/Rhoa/Strn3/Med1/Ufsp2/Ar/Hdac1	42
GO:0031398	positive regulation of protein ubiquitination	0.00852446	0.355932	9.52472e-07	4.27372e-06	Fam107a/Sphk1/Lrrk2/Ngf/Ubb/Fgfr3/Xiap/Cdk5rap3/Ube2n/Cav1/Septin4/Cblb/Dnaja3/Fbxw7/Rchy1/Trib1/Trib2/Arrdc3/Angpt1/Ube2d1/Sprtn/Prkn/Ndfip2/Pdcd6/Ube2v2/Rnf40/Psmd10/Mapk9/Gabarap/Ube2l3/Chfr/Klhl40/Rassf1/Mapk8/Arrb1/Pttg1ip/Cry1/Arrdc4/Commd1/Btrc/Amer1/Peli1	42
GO:1902806	regulation of cell cycle G1/S phase transition	0.0121778	0.3125	9.59067e-07	4.29711e-06	Cdkn1a/Fam107a/Cirbp/Ccnd1/Fbxo31/Actb/Ddr2/Ccnd2/Adam17/Nacc2/Hacd1/Tcim/Stxbp4/Gas1/Prmt2/Ctdsp2/Rgcc/Appl1/Plcg2/Fhl1/Mlf1/Trp53/Csf1r/Gpnmb/Cenpj/Larp7/Cul4b/Fbxo7/Smarcb1/Bcl7c/Bcl2/Bcl7b/Rpa2/Ccnh/Akt1/Crlf3/Cdkn2d/Mdm2/Appl2/Dact1/Ptpn6/Crebbp/Rfwd3/Pbrm1/Rbl2/Pdpn/Rassf1/Paf1/Acvr1/Tbx2/Mettl13/Brd7/Arid1b/Casp2/Rps27l/Egfr/Ppp2ca/Rrm1/Pkd2/Cdk7	60
GO:0043280	positive regulation of cysteine-type endopeptidase activity involved in apoptotic process	0.00913335	0.346154	9.72352e-07	4.35036e-06	Ccn2/Xdh/Ret/Ppm1f/Fas/Ngf/Hspd1/Casp8/Dap/Acer2/Pdcd5/Myc/Tfap4/Dnaja3/Sox7/Rest/Bok/Cycs/Bak1/Uaca/Stat1/Sirt1/Col4a3/Hip1r/Pdcd6/Wdr35/Fis1/Bmyc/Bcl2l11/Mapk9/Tnfsf10/Fam162a/Ift57/Hip1/Smad3/Card9/Arl6ip5/Arrb1/Mul1/Mtch1/Casp2/Rps27l/Rhoa/Rnf7/Ctsd	45
GO:0061025	membrane fusion	0.011163	0.321637	9.76823e-07	4.35509e-06	Doc2b/Tom1/Sphk1/Vps11/Coro1a/Dysf/Erc1/Vamp8/Samd9l/Rab7/Pla2g5/Myof/Vav3/Uvrag/Septin8/Rab20/Tbc1d4/Grik5/Cav2/Fer1l5/Chmp6/Cplx2/Rab3a/C2cd5/Chmp4b/Yipf7/Chmp2a/Pla2g4a/Rab8b/Nectin2/Hace1/Stxbp1/Vamp3/Dnm1l/Snap47/Rab34/Chmp1b2/AU040320/Chmp1b/Snap29/Stx8/Gas6/Snap23/Ankrd27/Tie1/Sec22b/Yipf4/Vcpip1/Cd9/Eea1/Syt3/Syt11/Syt7/Pip4k2b/Chmp5	55
GO:0002429	immune response-activating cell surface receptor signaling pathway	0.01644	0.285211	9.7761e-07	4.35509e-06	Pik3r1/Plscr2/Btnl9/Wnk1/Ninj1/Dusp3/Ptprc/Ighm/Pde4b/Cmtm3/Tnip2/Nfkbia/Ube2n/Appl1/Plcg2/Vav3/Znrf1/Ifi35/Gps2/Nfatc2/Fosl2/Csk/Nr1d1/Thy1/Lat2/Slc39a10/Eif2b3/Cd276/Cblb/Lyn/Rnf31/Cd38/Chuk/Plscr1/Lbp/Bcl2/Rftn1/Dusp22/Eif2b5/Tnfrsf21/Traf6/Lgals3/Tyrobp/Mef2c/Oas1b/Tec/Khdrbs1/Tril/Appl2/Crkl/Blk/Bag6/Rapgef1/Usp9x/Nectin2/Ptpn6/Grb2/Fyn/Cd28/Naglu/Stk11/Eif2b2/Tlr2/Tnfaip3/Eif2b1/C3ar1/Usp12…	81
GO:0048863	stem cell differentiation	0.01644	0.285211	9.7761e-07	4.35509e-06	Sema3c/Ret/Lmbr1l/Nrp1/Nrp2/Epop/Fn1/Ptprc/Sema6b/Sox17/Aldh1a2/Bmp4/Kdm3a/Bmpr1a/Prkca/Sema6d/Gata6/Cited2/Ext1/Tbx5/Fgf2/Trp53/Jarid2/Zfp36/Sox6/Hdac2/Sema6a/Sema3g/Dhx36/Cfl1/Chd2/Smo/Tcf15/Rest/Sfrp1/Nsun2/Bcl2/Sema3b/Esrrb/Sox18/Cdc42/Yap1/Zeb2/Cdk6/Setd1a/Mef2c/Tgfb2/Sema7a/Ednrb/Sema5a/Snai2/Lama5/Pdcd6/Smyd5/Mtf2/Vsir/Zfp36l2/Coro1c/Gatad2b/Mapk14/Psmd11/Cdh2/Chd3/Acvr1/Tbx2/Itgb1/N4bp2l2…	81
GO:0006643	membrane lipid metabolic process	0.0119748	0.31383	1.00638e-06	4.47685e-06	Abca8b/Cyp1b1/St8sia4/Tlcd3b/Gal3st3/Pigg/Hacd1/Abca8a/Sphk1/Hacd4/Map7/Crem/Spns2/Agk/Pgap1/Acer2/Degs1/Pigq/Kdsr/Dpm1/Plpp3/Prkcd/Pigs/St6galnac4/Pgap2/Sptlc2/Pyurf/Asah2/Pigu/Sgpl1/Abca12/Enpp2/B4galt6/Sphk2/Plpp1/Pigk/St8sia6/Hexb/St3gal2/Pigw/Pgap3/Cln6/Pigc/Pigo/Naglu/Samd8/Cers2/Cln8/Asah1/Hacd3/Smpd2/Osbp/Smpd1/Naga/A4galt/Pigv/Sccpdh/Ormdl1/Cers4	59
GO:0140747	regulation of ncRNA transcription	0.00730668	0.378947	1.00929e-06	4.4818e-06	Apln/Gata2/Ets1/Atoh8/Egr1/Nr3c1/Foxo3/Bmp4/Bmpr1a/Gata6/Wdr82/Trp53/Nop53/Larp7/Myc/Hdac2/Smarcb1/Rest/Mrtfb/Gnl3/Tgfb1/Zfp143/Tgfb2/Zc3h4/Sirt7/Bmyc/Mrtfa/Nfatc4/Srebf1/Smad3/Tead1/Jun/Egfr/Rara/Smad1/Ar	36
GO:0045088	regulation of innate immune response	0.0247615	0.257384	1.01038e-06	4.4818e-06	Ifi203/Cd74/Pik3r1/Irf7/Plscr2/Mndal/Ninj1/Ddx60/Gbp2/Ttll12/Wnt5a/Trafd1/Tspan6/Stat2/Hspd1/Ifi207/Colec12/Tnip2/Irgm1/Nfkbia/Casp8/Riok3/Irak3/Pla2g5/Cav1/Appl1/Lacc1/Ptprs/Plcg2/Cfh/Znrf1/Nop53/Ifi35/Apoe/Gps2/Nr1d1/Mapkapk3/Unc93b1/Ifi205/Casp6/Lyn/Nploc4/Trim3/Dnaja3/Parp1/Chuk/Plscr1/Lbp/Alpk1/Tgfb1/Dusp10/Ap3b1/Rftn1/Tlr3/Slc15a3/Akt1/Serpinb9/Arrb2/Traf6/Dtx4/Atat1/Traf3/Tyrobp/Polr3d/Otu…	122
GO:1901988	negative regulation of cell cycle phase transition	0.0158311	0.287823	1.04235e-06	4.61704e-06	Cdkn1a/Fam107a/Ccnd1/Fbxo31/Ints7/Nacc2/Nek1/Ptpn11/Gas1/Miip/Prmt2/Ctdsp2/Dync1li1/Syf2/Cdk5rap3/Apbb2/Rgcc/Ccng1/Hus1/Fhl1/Trp53/Nop53/Prpf19/Gpnmb/Xpc/Taok3/Fbxo7/Eme2/Nsun2/Bcl2/Atm/Xrcc3/Creb3l1/Rpa2/Etaa1/Rbbp8/Crlf3/Timeless/Nabp2/Cdkn2d/Atrip/Cdc5l/Mdm2/Ppp1r10/Zwint/Dact1/Ik/Atf5/Rad21/Trp53bp1/Rfwd3/Taok1/Mad2l1/Zfp36l2/Rbl2/Brcc3/Mapk14/Chfr/Rnaseh2b/Acvr1/Map3k20/Mettl13/Mre11a/Brd7/C…	78
GO:0033137	negative regulation of peptidyl-serine phosphorylation	0.00345038	0.566667	1.0587e-06	4.67614e-06	Inpp5k/Ppm1f/Ggnbp2/Cnksr3/Cav1/Ogt/Nck1/Gpd1l/Epm2a/Bak1/Smad7/Nck2/Inpp5j/Dmtn/Rassf2/Dmd/Gadd45a	17
GO:0061003	positive regulation of dendritic spine morphogenesis	0.00345038	0.566667	1.0587e-06	4.67614e-06	Baiap2/Eef2k/Cux2/Kalrn/Marcks/Afdn/Caprin1/Dhx36/Reln/Dbn1/Opa1/Dnm1l/Caprin2/Actr2/Bhlhb9/Actr3/Camk2b	17
GO:0030947	regulation of vascular endothelial growth factor receptor signaling pathway	0.00365334	0.545455	1.09152e-06	4.81424e-06	Emilin1/Kdr/Nrp1/Bmp4/Tmem204/Grb10/Myof/Vegfc/Fgf18/Dll1/Tek/Fgf9/Angpt1/Pdcd6/Fzd4/Hhex/Mmrn2/Dab2ip	18
GO:0048732	gland development	0.0253704	0.255624	1.09831e-06	4.83733e-06	Cdo1/Xdh/Ccnd1/Gata2/Sema3c/Twsg1/Nrp1/Plxnd1/Errfi1/Serpinf1/Hmox1/Gja1/Fkbp4/Kalrn/Zfas1/Wnt5a/Nr3c1/Bmp4/Cbx7/Igfbp5/Rpgrip1l/Sulf1/Bmpr1a/Cdk5rap3/Gata6/Cited2/Ext1/Cav1/Cflar/Vwf/Capn1/Fgf2/Adrm1/Asl/Jarid2/Creb1/Tcf21/Mmp2/Tgfbr2/Ezh1/Plau/Plxna1/Agap2/Irs2/Ntn1/Csf1/Smarcb1/Smo/Chaserr/Insr/Sfrp1/Mrtfb/Chuk/Wls/Fgf18/Bcl2/Atm/Sec63/Tgfb1/Igf1r/Zmpste24/Asxl1/Prlr/Map2k1/Slit2/Zdhhc21/Tgfb3…	125
GO:0046394	carboxylic acid biosynthetic process	0.0180637	0.277259	1.10915e-06	4.87817e-06	Cd74/Glul/Ptgs1/Akr1c14/Ptgds/Aldh18a1/Hacd1/Fabp5/Errfi1/Sphk1/Ces1d/Decr2/Mtr/Sco1/Uros/Mthfr/Acaca/Aldh1a2/Hacd4/Erlin2/Gatm/Stard4/Alox5/Ass1/Hsd17b10/Pla2g5/Cth/Mgll/Cyp27a1/Dse/Degs1/Asl/Erlin1/Nr1d1/Got1/Lpl/Cad/Asah2/Scd4/Apip/Slc45a3/Sdsl/Amacr/Prkab2/Per2/Plp1/Dhfr/Eif6/Ptgis/Slc25a12/Sirt2/Sirt1/Prkaa2/Pla2g4a/Agt/Mtrr/Ugdh/Mgst3/Tecrl/Lpgat1/Mapk9/Lias/Acacb/Abhd2/Srebf1/Gls/Acss1/Scd…	89
GO:0006260	DNA replication	0.0160341	0.286232	1.13346e-06	4.97766e-06	Polq/Jade2/Pole4/Tspyl2/Pola1/Fam111a/Mcm2/Exd2/Rpa3/Actr8/Tnfaip1/Dach1/Ino80c/Trp53/Zpr1/Cacybp/Ehmt2/E4f1/Nfrkb/Pds5a/Uchl5/Gmnn/Dnaja3/Parp1/Eme2/Mcm7/Brpf3/Smarca5/Tk1/Tk2/Rpa2/Etaa1/Gins1/Zmpste24/Mcrs1/Rbbp8/Cdc42/Recql/Timeless/Ruvbl2/Pola2/Top1/Lig4/Inppl1/Cdk9/Lig3/Usp37/Poln/Obi1/Gtpbp4/Carm1/Rfwd3/Pole/Orc4/Mettl4/Actr5/Stn1/Wrn/Baz1a/Mapk8/Rmi1/Polk/Jun/Samhd1/Mre11a/Tbrg1/Rfc5/Dhx9/…	79
GO:2000630	positive regulation of miRNA metabolic process	0.00527704	0.440678	1.13497e-06	4.97766e-06	Apln/Gata2/Ets1/Atoh8/Egr1/Nr3c1/Foxo3/Bmp4/Bmpr1a/Trp53/Myc/Pnpt1/Mrtfb/Gnl3/Tgfb1/Tgfb2/Bmyc/Mrtfa/Srebf1/Smad3/Tead1/Jun/Zswim8/Egfr/Smad1/Ar	26
GO:0002687	positive regulation of leukocyte migration	0.0113659	0.318182	1.15127e-06	5.04205e-06	Cd74/Pik3r1/Wnk1/Adam17/Jam2/Lgmn/Trpv4/Cxcl12/Wnt5a/Jam3/Coro1a/Dysf/Adam10/Ccr2/Trp53/Vegfc/Calr/Csf1r/Thy1/Mmp14/Thbs1/Csf1/Lbp/Aoc3/Pla2g7/Tgfb1/Swap70/Ptk2b/Mcu/Ripor2/Dock8/Lgals3/Ptk2/Cx3cl1/Cxcl14/Nedd9/Creb3/Tlr2/Selenok/Thbs4/Dnm1l/Mia3/C3ar1/Pecam1/Tirap/Cd47/Camk1d/Cd99l2/Gas6/C1qbp/Pdgfd/Nckap1l/Rhoa/Zfp580/Lgals9/Stk39	56
GO:0002931	response to ischemia	0.00466816	0.469388	1.20913e-06	5.28797e-06	Bcl2l1/Egr1/Ppif/Kcnj11/Cav1/Hyou1/Tigar/Trp53/Csf1r/Csf1/Rest/Bcl2/Ptk2b/Uchl1/Per2/Bves/Mef2c/Cx3cl1/Kcnj8/Camk2a/Rock2/Rcan1/Sos1	23
GO:0090090	negative regulation of canonical Wnt signaling pathway	0.00933631	0.340741	1.22837e-06	5.3646e-06	Limd1/Lmbr1l/Egr1/Dab2/Wnt5a/Foxo3/Sox17/Ppp2r3a/Lzts2/Cav1/Tmem64/Apoe/Dact3/Wnt11/Tle2/Hdac2/Invs/Sfrp1/G3bp1/Apc2/Nppa/Ptpru/Ruvbl2/Stk3/Snai2/Prkn/Rapgef1/Dact1/Mad2l2/Bicc1/Sdhaf2/Stk11/Mapk14/Ubac2/Lrp4/Cdh2/Ccdc88c/Ddit3/Nphp3/Tmem88/Tcf7l2/Rbms3/Amer1/Emd/Dab2ip/Hdac1	46
GO:0044272	sulfur compound biosynthetic process	0.00852446	0.352941	1.23083e-06	5.36779e-06	Mtr/Mettl16/Mthfr/Acsl5/Pxylp1/Ext1/Mmut/Cth/Dse/Xylt1/Slc25a19/Chst7/Hs3st5/Apip/Ndst2/Pdk2/Chpf2/Angpt1/Fmo1/Slc35d2/Mat2b/Papss1/Mtrr/Ugdh/Dlat/Lias/Chsy1/Mat2a/Acacb/Acss1/Hs6st1/Extl3/Chst14/Gcdh/Dld/Slc10a7/Mtap/Gstp2/Ext2/Hs3st1/Tpk1/Tcf7l2	42
GO:0048771	tissue remodeling	0.0131926	0.302326	1.27343e-06	5.53503e-06	Tfrc/Pth1r/Ddr2/Sema3c/Ahsg/Nos2/Gja1/Tmbim1/Eln/Gja5/Igfbp5/Fgfr3/Prkca/Ccr2/Rab7/Ext1/Cav1/Tmem64/Cspg4/Capn1/Dll4/Trp53/Csf1r/Fosl2/Csk/Mmp2/Gpnmb/Mmp14/Chd7/Sfrp1/Cd38/Tcirg1/Ptk2b/Itgav/Traf6/Flna/Bak1/Mef2c/Angpt2/Tgfb2/Rab3d/Mdm2/Atg5/Abi3bp/Tns3/Agt/Fkrp/Igf1/Pbrm1/Thbs4/Epas1/Cd24a/Dock5/Lrrk1/Stat5a/Rassf2/Rock2/Tie1/Egfr/Abcb1b/Syt7/Nf1/Tgfbr3/Lepr/Tgm2	65
GO:0042542	response to hydrogen peroxide	0.00710371	0.380435	1.27452e-06	5.53503e-06	Lcn2/Cyp1b1/Bnip3/Sphk1/Hmox1/Nqo1/Ppif/Sirpa/Capn1/Sod1/Mmp2/Casp3/Hdac2/Aqp1/Prkcd/Casp6/Cfl1/Gja3/Bcl2/Ptk2b/Sirt1/Ripk3/Fyn/Setx/Rnf146/Tnfaip3/Kpna4/Akr1b1/Mapk8/Rhob/Prkaa1/Adam9/Zfp580/Sod2/Gpx1	35
GO:1903321	negative regulation of protein modification by small protein conjugation or removal	0.00710371	0.380435	1.27452e-06	5.53503e-06	Wnk1/Sqstm1/Dysf/Cav1/Rasd2/Gps2/Ogt/Dnaja1/Akt1/Arrb2/Per2/Ubxn1/Smad7/Atg5/Gtpbp4/Gclc/Limk1/Mad2l2/Sirt7/Fyn/Mad2l1/Bag5/Tnfaip3/Klhl40/Parp10/Gnl3l/Arrb1/Prmt3/Cry1/Hdac8/Nxn/Sh3rf2/Prkcg/Pias3/Spopl	35
GO:0000079	regulation of cyclin-dependent protein serine/threonine kinase activity	0.00588593	0.414286	1.33549e-06	5.79172e-06	Cdkn1a/Ccnd1/Actb/Ccnd2/Adam17/Cdk5rap3/Rgcc/Ccng1/Cnppd1/Casp3/Tfap4/Fbxo7/Sfn/Ccnh/Akt1/Cdk5rap1/Cdkn2d/Gtpbp4/Ccnj/Psmd10/Tnfaip3/Inca1/Pim1/Hhex/Cdk5rap2/Egfr/Ccne2/Pkd2/Ccni	29
GO:0034644	cellular response to UV	0.00730668	0.375	1.35117e-06	5.85157e-06	Cdkn1a/Pik3r1/Trp53inp1/Mme/Mmp3/Ercc1/Trp53/Mmp2/Bmf/Xpc/Cul4b/Aqp1/Prkcd/Dhx36/Parp1/Fbxw7/Ruvbl2/Bak1/Agap3/Mapk11/Rhbdd1/Mettl3/Ppid/Sirt1/Crebbp/Stk11/Mapk9/Xpa/Nfatc4/Actr5/Mapk14/Map3k20/Polk/H2ac25/Smpd1/Triap1	36
GO:2001056	positive regulation of cysteine-type endopeptidase activity	0.0099452	0.331081	1.4626e-06	6.32535e-06	Ccn2/Xdh/Ret/Perp/Lgmn/Ppm1f/Fas/Ngf/Hspd1/Casp8/Dap/Acer2/Pdcd5/Myc/Tfap4/Dnaja3/Sox7/Rest/Bok/Cycs/Bak1/Uaca/Stat1/Sirt1/Col4a3/Hip1r/Pdcd6/Fyn/Wdr35/Asph/Fis1/Bmyc/Bcl2l11/Mapk9/Tnfsf10/Fam162a/Ift57/Hip1/Smad3/Card9/Arl6ip5/Arrb1/Mul1/Mtch1/Casp2/Rps27l/Rhoa/Rnf7/Ctsd	49
GO:0001938	positive regulation of endothelial cell proliferation	0.0077126	0.365385	1.47163e-06	6.33795e-06	Apln/Gata2/Kdr/Adam17/Lrg1/Hmox1/Cxcl12/Wnt5a/Dysf/Bmp4/Plxnb3/Bmp6/Fgfr3/Prkca/Cav1/Fgf2/Col18a1/Hspg2/Vegfc/Aggf1/Cav2/Ppp1r16b/Akt1/Sema5a/Sirt1/Pdcd6/Igf1/Thbs4/Akt3/Pdcl3/Stat5a/Emc10/Jun/Nras/Mydgf/Zfp580/Nf1/Plcg1	38
GO:0007173	epidermal growth factor receptor signaling pathway	0.0077126	0.365385	1.47163e-06	6.33795e-06	Ptprf/Itga1/Dusp3/Errfi1/Ptpn11/Socs5/Rab7/Efemp1/Cblb/Rnf126/Rhbdf1/Tgfb1/Chmp6/Ptk2b/Plce1/Nppa/Akt1/Snx5/Ptk2/Kif16b/Hip1r/Agt/Grb2/Erbb2/Arf4/Hip1/Rala/Rhbdf2/Iqgap1/Cnot9/Sos1/Ralb/Egfr/Erbb3/Ccdc88a/Plcg1/Dab2ip/Cbl	38
GO:0042274	ribosomal small subunit biogenesis	0.0077126	0.365385	1.47163e-06	6.33795e-06	Riok3/Rps27rt/Ngdn/Wdr43/Fau/Nop14/Lsm6/Utp3/Nom1/Ltv1/Rrs1/Abt1/Nat10/Dimt1/Tsr3/Nob1/Dhx37/Nop56/Utp20/Emg1/Rps9/Slx9/Utp6/Dnttip2/Utp23/Wdr46/Krr1/Srfbp1/Rps14/Rps28/Rps25/Tsr2/Aatf/Rps5/Utp4/Rps27l/Mettl17/Rps11	38
GO:0044042	glucan metabolic process	0.00669779	0.388235	1.49311e-06	6.42155e-06	Gnmt/Pcdh12/Adrb1/Gabarapl1/Inpp5k/Gfpt1/Grb10/Phkg1/Phka1/C1qtnf2/Khk/Nr1d1/Sorbs1/Irs2/Phkb/Insr/Epm2a/Esrrb/Akt1/Ppp1r2/Ppp1r3d/Stk40/Ppp1r3b/Per2/Phka2/Gys1/Igf1/Phkg2/Pgm2/Ppp1ca/Agl/Lepr/Tcf7l2	33
GO:0052548	regulation of endopeptidase activity	0.0196874	0.269444	1.51486e-06	6.50611e-06	Serpinh1/Serpina3n/Ccn2/Xdh/Herpud1/Ret/Timp4/Perp/Lgmn/Ahsg/Serpinf1/Ppm1f/Bin1/Epha4/Fas/Ngf/Adora2a/Dpep1/Hspd1/Casp8/Dap/Xiap/Timp3/Furin/Cflar/Acer2/Picalm/Pdcd5/Myc/Tfap4/Aqp1/Thbs1/Lyn/Dnaja3/Sox7/Rest/Bok/Mical1/Sfn/Akt1/Serpinb9/Arrb2/Cycs/Bak1/Epha7/Cdkn2d/Uaca/Mdm2/Prelid1/Stat1/Vtn/Sirt1/Col4a3/Hip1r/Pdcd6/Timp2/Efna1/Fyn/Igf1/Sh3rf1/Wdr35/Asph/Dnajb6/Fis1/Bmyc/Vsir/Mrtfa/Rps6ka1/Bcl2…	97
GO:0010658	striated muscle cell apoptotic process	0.0060889	0.405405	1.52581e-06	6.54411e-06	Rps6ka2/Igfbp3/Bnip3/Fndc1/Zfas1/Gata6/Bag3/Cflar/Capn1/Tigar/Trp53/Fbxo32/Camk2d/Bcl2/Slc25a4/Trip10/Rapgef3/Ppp1r10/Atg5/Sirt1/Sirt4/Acot1/Naca/Agt/Camk2a/Pdpk1/Hmgcr/Mapk8/Gnb1/Dynlt1b	30
GO:0051924	regulation of calcium ion transport	0.016846	0.280405	1.53556e-06	6.57684e-06	Adrb1/Selenon/Tmem38b/Gja1/Zfas1/Cxcl12/Rgs4/Inpp5k/Pde4b/Cacnb2/Trpc3/Coro1a/Dysf/Bin1/Bmp4/Tspan13/Ngf/Adora2a/Casq1/Cav1/Plcg2/Ace/Cabp1/Thy1/Usp2/Ank2/Chd7/Lyn/Trpv2/Camk2d/Ahnak/Akap6/Bcl2/Tgfb1/Ptk2b/Casq2/Nppa/Akt1/Arrb2/Lgals3/Plp1/Bak1/Epb41/Pacsin3/Sphk2/Adcyap1r1/Tgfb2/Grin3b/Rapgef3/Tspan18/Atg5/Hrc/Strit1/Cav3/Gnb5/Agt/Cx3cl1/Ptpn6/Rem1/Fyn/Igf1/Asph/Slc8a1/Creb3/Camk2a/P2rx5/Cracr2b…	83
GO:0050921	positive regulation of chemotaxis	0.0107571	0.321212	1.5932e-06	6.81432e-06	Fgf16/Cd74/Smoc2/Wnk1/Kdr/Nrp1/Adam17/Lgmn/Fn1/Trpv4/Cxcl12/Wnt5a/Ppm1f/Dysf/Adam10/Prkca/Ccr2/Fgf2/Vegfc/Calr/Csf1r/Thbs1/Csf1/Lpar1/Lbp/Fgf18/Pla2g7/Tgfb1/Swap70/Ptk2b/Mcu/Ripor2/Slit2/Sema5a/Snai2/Ptk2/Cx3cl1/Cxcl14/Nedd9/Creb3/Thbs4/Dnm1l/Smad3/C3ar1/Tirap/Camk1d/Ntf3/Gas6/C1qbp/Pdgfd/Nckap1l/Zfp580/Stk39	53
GO:1902895	positive regulation of miRNA transcription	0.00487112	0.45283	1.60132e-06	6.83966e-06	Apln/Gata2/Ets1/Atoh8/Egr1/Nr3c1/Foxo3/Bmp4/Bmpr1a/Trp53/Myc/Mrtfb/Gnl3/Tgfb1/Tgfb2/Bmyc/Mrtfa/Srebf1/Smad3/Tead1/Jun/Egfr/Smad1/Ar	24
GO:0006029	proteoglycan metabolic process	0.00690075	0.382022	1.60836e-06	6.86027e-06	Sulf1/Gusb/Pxylp1/Ext1/Dse/Xylt1/Mustn1/Adamts7/Chst7/B3galt6/Hs3st5/Ndst2/Chpf2/Arsb/Slc35d2/Hexb/Fam20b/Dsel/Ids/Ugdh/Igf1/Naglu/Chsy1/Cytl1/Hs6st1/Bpnt2/Extl3/B4galt7/Chst14/Man1c1/Sulf2/Ext2/Hs3st1/Tcf7l2	34
GO:0061337	cardiac conduction	0.00568297	0.41791	1.64135e-06	6.99141e-06	Tmem65/Gja1/Scn4b/Cacnb2/Bin1/Gja5/Cxadr/Dsc2/Tbx5/Cav1/Kcnh2/Tnni3k/Ank2/Abcc9/Hcn4/Zmpste24/Irx3/Flna/Kcnj2/Hrc/Kcnd3/Gjc1/Agt/Ctnna3/Ace2/Slc8a1/Slc4a3/Pkp2	28
GO:0048846	axon extension involved in axon guidance	0.0038563	0.513514	1.85712e-06	7.88889e-06	Sema3c/Nrp1/Nrp2/Sema6b/Cxcl12/Wnt5a/Sema6d/Slit3/Sema6a/Sema3g/Smo/Sema3b/Slit2/Sema7a/Sema5a/Plxna4/Sema6c/Sema4a/Sema3a	19
GO:1902284	neuron projection extension involved in neuron projection guidance	0.0038563	0.513514	1.85712e-06	7.88889e-06	Sema3c/Nrp1/Nrp2/Sema6b/Cxcl12/Wnt5a/Sema6d/Slit3/Sema6a/Sema3g/Smo/Sema3b/Slit2/Sema7a/Sema5a/Plxna4/Sema6c/Sema4a/Sema3a	19
GO:0051851	modulation by host of symbiont process	0.00649482	0.390244	1.87528e-06	7.93494e-06	Inpp5k/Tmem41b/Apoe/Csf1r/Tbc1d20/Tfap4/Cfl1/Smarcb1/Zdhhc9/Cav2/Ddx56/Rest/Napepld/Cdc42/Psmc3/Stom/Cdk9/Ctdp1/Prkn/Sap30bp/Sap30/Card9/Snw1/Jun/Rock2/Tardbp/Brd4/Zfp639/Pcx/Eea1/Rab29/Hdac1	32
GO:0006739	NADP metabolic process	0.00466816	0.46	1.87817e-06	7.93494e-06	Fmo2/Nnt/Aldh1l1/Aldob/Hsd11b1/Rpia/Nudt12/Aldh1l2/Nqo1/Dcxr/Cyb5r4/Prps2/Tigar/Trp53/Rpe/Me1/Mlst8/Idh2/Fmo1/Taldo1/Ncf2/Noct/Pcx	23
GO:0009116	nucleoside metabolic process	0.00466816	0.46	1.87817e-06	7.93494e-06	Gnmt/Xdh/Ahcy/Nt5c1a/Ahcyl/Nt5e/Dpyd/Cdadc1/Dck/Gda/Adal/Nt5c3/Tk1/Tk2/Dtymk/Nudt1/Enpp4/Dguok/Pgm2/Oard1/Nt5c2/Mtap/Pycr3	23
GO:0071526	semaphorin-plexin signaling pathway	0.00466816	0.46	1.87817e-06	7.93494e-06	Sema3c/Kdr/Nrp1/Plxnd1/Nrp2/Sema6b/Plxnb3/Sema6d/Plxnb1/Ece1/Sema6a/Sema3g/Plxna1/Plxnc1/Sema3b/Flna/Mef2c/Sema7a/Sema5a/Plxna4/Sema6c/Sema4a/Sema3a	23
GO:0042886	amide transport	0.0227319	0.259259	1.89754e-06	8.00589e-06	Doc2b/Cd74/Glul/Apln/Pim3/Myrip/Nos2/Stxbp4/Ptpn11/Gja1/Ptprn/Kalrn/Trpv4/Fbn1/Nr3c1/Aqp7/Pltp/Myh9/Midn/Bmal1/Abcg2/Pfkl/Adora2a/Tbc1d1/Bdnf/Sybu/Dynll1/Slc25a13/Alox5/Oxct1/Kcnj11/Cyb5r4/Slc16a10/Kcnb1/Exoc3l/Rasl10b/Grm1/Nr1d1/Apba1/Aqp1/Chd7/Rapgef4/Irs2/Abcb1a/Disp1/Abca1/Abcc5/Rest/Sfrp1/Clcf1/Camk2n1/Dtnbp1/Cd38/Pde3b/Tcirg1/Epm2a/Slc15a3/Mcu/Abca12/Rph3al/Per2/Sidt2/Slc26a6/Slc25a12/Slc16…	112
GO:0062207	regulation of pattern recognition receptor signaling pathway	0.00953927	0.333333	1.91439e-06	8.06604e-06	Pik3r1/Irf7/Ninj1/Ddx60/Gbp2/Tspan6/Irgm1/Riok3/Irak3/Cav1/Appl1/Ptprs/Plcg2/Znrf1/Nop53/Ifi35/Gps2/Nr1d1/Lyn/Nploc4/Trim3/Lbp/Slc15a3/Arrb2/Atat1/Sirt2/Appl2/Nek7/Hcfc2/Irf1/Gpatch3/Brcc3/Tnfaip3/Pdpk1/Rnf125/Mapk8/Nr1h3/Tirap/Mark4/C1qbp/Erbin/Casp4/Ppp2ca/Nagk/Ufd1/Dab2ip/Peli1	47
GO:0050878	regulation of body fluid levels	0.0190785	0.270115	1.94287e-06	8.17498e-06	Cdo1/Xdh/Apln/Ccnd1/Adrb1/Rab27a/Wnk1/Pdia4/Gja1/Fbln1/Kalrn/Trpv4/Inpp5k/Anxa2/Aqp7/Mfsd2b/Gp1ba/Gja5/Map1lc3b/Adora2a/Vamp8/Il6ra/Prkca/Ext1/Cav1/Vwf/Emilin2/Nppb/Mertk/Cfh/Pros1/Thbd/Plat/Akap11/Apoe/Tspan9/Creb1/P2ry1/Fosl2/Coro2b/C1galt1c1/Adcy6/Entpd1/Aqp1/Thbs1/Prkcd/Plau/Lyn/Nr3c2/Pdss2/Dtnbp1/Chuk/Ap3b1/Heg1/Prlr/Flna/Entpd2/Lnpk/Pear1/Evl/Tec/Ednrb/Socs2/Rap2b/Tspan18/Atg5/F13a1/Vtn/Hps…	94
GO:0002688	regulation of leukocyte chemotaxis	0.00933631	0.335766	1.95271e-06	8.20527e-06	Cd74/Wnk1/Ninj1/Adam17/Lgmn/Rin3/Trpv4/Cxcl12/Wnt5a/Jam3/Dysf/Adam10/Ccr2/Dusp1/Vegfc/Calr/Csf1r/Thbs1/Csf1/Lyn/Lbp/Pla2g7/Swap70/Ptk2b/Mcu/Ripor2/Slit2/Mpp1/Ptk2/Mmp28/Mtus1/Cx3cl1/Cxcl14/Nedd9/Creb3/Thbs4/Dnm1l/C3ar1/Tirap/Camk1d/Gas6/C1qbp/Nckap1l/Zfp580/Nbl1/Stk39	46
GO:1902235	regulation of endoplasmic reticulum stress-induced intrinsic apoptotic signaling pathway	0.00345038	0.548387	1.97085e-06	8.25919e-06	Bcl2l1/Herpud1/Serinc3/Lrrk2/Hyou1/Grina/Nck1/Bok/Creb3l1/Txndc12/Nck2/Opa1/Prkn/Sirt1/Creb3/Xbp1/Selenos	17
GO:1903055	positive regulation of extracellular matrix organization	0.00345038	0.548387	1.97085e-06	8.25919e-06	Fscn1/Ddr2/Emilin1/Clasp1/Rgcc/Cflar/Tnxb/Efemp2/Clasp2/Tgfb1/Tgfb2/Sema5a/Mad2l2/Agt/Phldb2/Pdpn/Smad3	17
GO:0043255	regulation of carbohydrate biosynthetic process	0.00811853	0.353982	2.0043e-06	8.38804e-06	Gnmt/Pth1r/Inpp5k/Nr3c1/Myh9/Gfpt1/Grb10/C1qtnf2/Plcd1/P2ry1/Gpt2/Sorbs1/Ogt/Irs2/Slc35b4/Insr/Tgfb1/Ptk2b/Esrrb/Akt1/Ppp1r3d/Ppp1r3b/Pdk2/Adcyap1r1/Dgat2/Soga1/Sirt1/Sirt7/Cltc/Zfp692/Igf1/Stk11/Ppp1ca/P2ry6/Cry1/Prkaca/Gpt/Clk2/Lepr/Tcf7l2	40
GO:0046622	positive regulation of organ growth	0.00548001	0.421875	2.01028e-06	8.40175e-06	Adrb1/Ccnd2/Ybx3/Nr3c1/Bmpr1a/Gata6/Tbx5/Fgf2/Smo/Akap6/Slc25a4/Akt1/Yap1/Fgf9/Mef2c/Trip10/Hlx/Sirt1/Agt/Igf1/Acacb/Mapk14/Pim1/Tbx2/Zfpm2/Tgfbr3/Tbx20	27
GO:0001654	eye development	0.0225289	0.259346	2.06844e-06	8.63322e-06	Sdk2/Cyp1b1/Tspan12/Col5a1/Pxdn/Col8a1/Rcn1/Col5a2/Ninj1/Vim/Kdr/Ift122/Twsg1/Ppp1r13l/Nrp1/Gas1/Gja1/Flt1/Col4a1/Cc2d2a/Aldh1a2/Bmp4/Arhgef15/Bmp6/Rpgrip1l/Bdnf/Ppp2r3a/Prom1/Hipk1/Fgfr3/Ephb1/Spred2/Cacna1s/Frem2/Cited2/Atf4/Fgf2/Cdon/Mertk/Tbc1d32/Dll4/Six5/Cfh/Tbc1d20/Thy1/Tgfbr2/Hdac2/Pds5b/Aqp1/Casp6/Bbs7/Chd7/Pds5a/Fat1/Abi2/Hmgn1/Pcnt/Thrb/Bcl2/Tcirg1/Tenm3/Mfap5/Tgfb1/Zeb1/Dll1/Slc4a7/Sk…	111
GO:0002274	myeloid leukocyte activation	0.0160341	0.282143	2.08925e-06	8.70841e-06	Plscr2/Ifngr2/Gata2/Clu/Ptgds/Adgrf5/Ctsc/Il4ra/Sphk1/Hmox1/Fn1/Lrrk2/Wnt5a/Pi4k2a/Dysf/Hspd1/Vamp8/Nampt/Tnip2/Irgm1/Adam10/Ccr2/Cd200/Pla2g5/Plcg2/Ifi35/Csf1r/Nr1d1/Lat2/Tgfbr2/Thbs1/Prkcd/Tmem106a/Lyn/Sbno2/Tmem229b/Plscr1/Ndrg1/Lbp/Fer1l5/Atm/Tgfb1/Il15/Tlr3/Rora/Nppa/Traf6/Tyrobp/Snhg20/Sphk2/Cplx2/Ywhaz/Ltbr/D6Wsu163e/Hspa4/Pla2g4a/Nectin2/Cx3cl1/Ptpn6/Kcnj8/Naglu/Stxbp1/Relb/Il33/Ldlr/Tlr2…	79
GO:0022612	gland morphogenesis	0.0103511	0.322785	2.1128e-06	8.79476e-06	Sema3c/Twsg1/Nrp1/Plxnd1/Wnt5a/Nr3c1/Bmp4/Igfbp5/Sulf1/Cav1/Cflar/Capn1/Mmp2/Tgfbr2/Plau/Plxna1/Ntn1/Csf1/Smo/Sfrp1/Fgf18/Bcl2/Tgfb1/Igf1r/Slit2/Lims1/Lims2/Snai2/Cav3/Lama5/Slc12a2/Igf1/Etv5/Ptch1/Rps6ka1/Tnfaip3/Xbp1/Btbd7/Eda/Stat5a/Tbx2/Itpr1/Zfp157/Plag1/Sulf2/Egfr/Sema3a/Med1/Btrc/Ar/Tgm2	51
GO:0061614	miRNA transcription	0.0060889	0.4	2.1298e-06	8.8537e-06	Apln/Gata2/Ets1/Atoh8/Egr1/Nr3c1/Foxo3/Bmp4/Bmpr1a/Gata6/Trp53/Myc/Hdac2/Rest/Mrtfb/Gnl3/Tgfb1/Tgfb2/Ddx17/Bmyc/Mrtfa/Nfatc4/Srebf1/Smad3/Tead1/Jun/Egfr/Rara/Smad1/Ar	30
GO:0001937	negative regulation of endothelial cell proliferation	0.00446519	0.468085	2.17974e-06	9.04918e-06	Xdh/Sparc/Atoh8/Gja1/Flt1/Vash1/Sulf1/Alox5/Cav1/Rgcc/Dll4/Synj2bp/Apoe/Thbs1/Cav2/Mef2c/Stat1/Aimp1/Col4a3/Nf1/Krit1/Mmrn2	22
GO:0002753	cytosolic pattern recognition receptor signaling pathway	0.0099452	0.326667	2.26071e-06	9.3728e-06	Irf7/Ddx60/Gbp2/Tspan6/Colec12/Tnip2/Irgm1/Nfkbia/Riok3/Cav1/Lacc1/Ptprs/Plcg2/Nop53/Unc93b1/Nploc4/Trim3/Alpk1/Rftn1/Tlr3/Slc15a3/Traf6/Atat1/Otulin/Oas1b/Sirt2/Ipo5/Nek7/Sting1/Hcfc2/Kcnj8/Irf1/Trim25/Gpatch3/Brcc3/Tnfaip3/Rnf125/Lsm14a/Mapk8/Tirap/Mark4/C1qbp/Erbin/Tbk1/Casp4/Ppp2ca/Nagk/Ufd1/Peli1	49
GO:0006112	energy reserve metabolic process	0.00710371	0.37234	2.28028e-06	9.42883e-06	Gnmt/Pcdh12/Adrb1/Adgrf5/Gabarapl1/Inpp5k/Gfpt1/Grb10/Phkg1/Phka1/C1qtnf2/Khk/Nr1d1/Sorbs1/Irs2/Phkb/Insr/Epm2a/Esrrb/Akt1/Ppp1r2/Ppp1r3d/Stk40/Ppp1r3b/Per2/Phka2/Gys1/Igf1/Phkg2/Pgm2/Ppp1ca/Gnas/Agl/Lepr/Tcf7l2	35
GO:0035050	embryonic heart tube development	0.00710371	0.37234	2.28028e-06	9.42883e-06	Ift122/Gja1/Wnt5a/Sox17/Aldh1a2/Gja5/Cited2/Ece1/Tgfbr2/Invs/C2cd3/Smo/Pcnt/Sox18/Dll1/Nckap1/Cdc42/Yap1/Mef2c/Rnf207/Plxna4/Slc8a1/Ift57/Smad3/Tead1/Acvr1/Tbx2/Tmem94/Hhex/Arl13b/Kif3a/Nphp3/Med1/Pkd2/Tbx20	35
GO:0014911	positive regulation of smooth muscle cell migration	0.00568297	0.411765	2.33781e-06	9.62828e-06	Postn/Cyp1b1/Tmsb4x/Ddr2/S100a11/Egr1/Igfbp5/Sema6d/Myc/Plau/Rapgef4/Smo/Lpar1/Camk2d/Bcl2/Fgf9/Rapgef3/Mdm2/Ptk2/Vtn/Dock7/Agt/Dock4/Igf1/Dock5/P2ry6/Iqgap1/Pdgfd	28
GO:0030330	DNA damage response, signal transduction by p53 class mediator	0.00568297	0.411765	2.33781e-06	9.62828e-06	Cdkn1a/Cd74/Ankrd1/Hic1/Foxo3/Spred2/Pla2r1/Acer2/Trp53/Eef1e1/Tfap4/Atm/Pcbp4/Zmpste24/Spred1/Dyrk1a/Mdm2/Snai2/Sirt1/Psmd10/Kmt5a/Pttg1ip/Bcl3/Myo6/Brca2/Triap1/Casp2/Rps27l	28
GO:0048286	lung alveolus development	0.00568297	0.411765	2.33781e-06	9.62828e-06	Kdr/Selenon/Errfi1/Tmem38b/Bmp4/Igfbp5/Fgfr3/Gata6/Creb1/Ace/Fosl2/Tcf21/Atxn1/Tmtc3/Tgfb1/Asxl1/Abca12/Stk40/Cic/Foxp2/Tgfb3/Tns3/Tnrc6c/Igf1/Pdpn/Hs6st1/Zfp157/Meg3	28
GO:0032007	negative regulation of TOR signaling	0.00629186	0.392405	2.3525e-06	9.67596e-06	Sesn1/Sesn3/Bmal1/Rnf152/Ddit4/Ube2n/Flcn/Castor1/Ubr2/Tsc1/Atm/Epm2a/Nlk/Ywhaz/Ube2d1/Rnf167/Spaar/Kptn/Sirt1/Prkaa2/Pdcd6/Sh3bp4/Stk11/Rps6ka1/Prkaa1/Prkaca/Akt1s1/Itfg2/Tbk1/Ube2w/Depdc5	31
GO:0050708	regulation of protein secretion	0.0182667	0.271903	2.36176e-06	9.70124e-06	Doc2b/Glul/Pim3/Myrip/Ankrd1/Nos2/Stxbp4/Ptpn11/Gja1/Fbn1/Myh9/Midn/Bmal1/Pfkl/Gja5/Adora2a/Tbc1d1/Vamp8/Sybu/Dynll1/Alox5/Tmem132a/Oxct1/Cd200/Kcnj11/Kcnb1/Vegfc/Cyp51/Apoe/Nr1d1/Cd2ap/Rapgef4/Irs2/Llgl2/Rest/Sfrp1/Camk2n1/Cd38/Pde3b/Wls/Rhbdf1/Tcirg1/Tgfb1/Mcu/Abca12/Rph3al/Per2/Sidt2/Tgfb2/Tgfb3/Idh2/Ppid/Blk/Myh10/Prkn/Sirt1/Sirt4/Pde8b/Abcg1/Slc12a2/Igf1/Rab11fip5/Rap1gds1/Tlr2/Zbed6/Dnm1l/S…	90
GO:0034349	glial cell apoptotic process	0.00263852	0.65	2.37776e-06	9.72898e-06	Akap12/Pmp22/Prkca/Trp53/Casp3/Prkcd/Dll1/Tnfrsf21/Igf1/Rad21/Mapk8/Gas6/Traf2	13
GO:0031123	RNA 3'-end processing	0.00730668	0.367347	2.3779e-06	9.72898e-06	Ints7/Ncbp2/Ints2/Rprd1a/Rprd2/Cstf2/Eri1/Hsd17b10/Supv3l1/Sympk/Larp7/Pnpt1/Dhx36/Cstf3/Papola/Exosc5/Leo1/Ints6/Cpsf7/Cdk9/Dkc1/Ptcd1/Ints14/Parn/Ints6l/Paf1/Clp1/Trnt1/Exosc2/Slbp/Zc3h3/Ythdc1/Scaf8/Cstf1/Exosc3/Nudt21	36
GO:0046683	response to organophosphorus	0.00730668	0.367347	2.3779e-06	9.72898e-06	Cdo1/Pik3r1/Errfi1/Gpd1/Inpp5k/Trpc3/Igfbp5/Per1/Crem/Kcnj11/Plcg2/Nt5e/Aqp1/Crls1/Lpar1/Abcc9/Hcn4/Akap6/Slc26a6/Rapgef3/Itpr3/Rapgef1/Kcnj8/Asph/Carm1/Slc8a1/Dmtn/Mat2a/P2rx5/P2ry6/Itpr1/Hsp90b1/Ndufs4/Pkd2/Hmga1/Hcn2	36
GO:0009141	nucleoside triphosphate metabolic process	0.0115689	0.309783	2.40134e-06	9.81195e-06	Bcl2l1/Myh7/Ak4/Lrrk2/Dut/Nudt16/Slc25a13/Flcn/Nudt15/Cfh/Nt5e/Nudt5/Atp6v1a/Ak3/Myc/Entpd1/Atpsckmt/Parp1/Cad/Tgfb1/Dtymk/Map2k1/Sphk2/Slc25a12/Ndufa2/Opa1/Cox11/Ndufa7/Prkn/Ola1/Rhoq/Ndufv1/Entpd4b/Fis1/Nme6/Atp5mc2/ATP6/Clpx/Ppargc1a/Rab23/Dnm1l/Dguok/Nmnat1/ND4L/Tbpl1/Ndufab1/Ldhd/Nme4/Ndufb2/Samhd1/Ctps1/Pid1/Ndufs4/Enpp3/Rhoa/Efl1/Ndufs7	57
GO:0010718	positive regulation of epithelial to mesenchymal transition	0.00487112	0.444444	2.4172e-06	9.85086e-06	Col1a1/Loxl2/Lrg1/Dab2/Bmp4/Tgfb1i1/Rgcc/Tgfbr2/Hdac2/Bcl9l/Tgfb1/Glipr2/Gcnt2/Tgfb2/Tgfb3/Bambi/Ptk2/Mad2l2/Agt/Pdpn/Smad3/Acvr1/Tcf7l2/Tbx20	24
GO:0045773	positive regulation of axon extension	0.00487112	0.444444	2.4172e-06	9.85086e-06	Tnfrsf12a/Nrp1/Fn1/Twf2/Cxcl12/Ngf/Map1b/Apoe/Ntn1/Trpv2/Zfyve27/L1cam/Dbn1/Sema7a/Sema5a/Limk1/Macf1/Cyfip1/Eif2b2/Arhgap32/Eif4g2/Shtn1/Mapt/Myo5b	24
GO:0010812	negative regulation of cell-substrate adhesion	0.00527704	0.42623	2.45235e-06	9.96798e-06	Apod/Fam107a/Col1a1/Postn/Pik3r1/Bcl6/Fbln1/Spry4/Acer2/Coro2b/Mmp14/Thbs1/Lgals1/Clasp2/Dusp22/Enpp2/Gcnt2/Angpt2/Phldb2/Arhgap6/Coro1c/Dmtn/Rasa1/Fzd4/Rhoa/Nf1	26
GO:0035924	cellular response to vascular endothelial growth factor stimulus	0.00527704	0.42623	2.45235e-06	9.96798e-06	Xdh/Smoc2/Emilin1/Kdr/Nrp1/Nrp2/Sphk1/Flt1/Ramp2/Dll4/Vegfc/Cd63/Sema6a/Ptp4a3/Adamts3/Tcf4/Map2k3/Dll1/Akt1/Ccbe1/Myo1c/Xbp1/Mapk14/Adgra2/Dcn/Dab2ip	26
GO:0043647	inositol phosphate metabolic process	0.00426223	0.477273	2.49782e-06	1.01395e-05	Pth1r/Itpkb/Myh9/Grk3/Nudt4/Ppip5k1/Fgf2/Plcg2/Plcd1/P2ry1/Ptk2b/Ip6k1/Adcyap1r1/Inppl1/Plcb3/Itpk1/Ip6k2/Ip6k3/Itpkc/P2ry6/Plcg1	21
GO:1905954	positive regulation of lipid localization	0.00872742	0.34127	2.56794e-06	1.04106e-05	Abca8b/Abca8a/Ces1d/Plin3/Dab2/Anxa2/Pltp/Bmp6/Acsl5/Nfkbia/Washc1/Pla2r1/Cav1/Apoe/Gps2/Map2k6/Cidea/Abca7/Prkcd/Ehd1/Abca1/Lpl/Abcb4/Eepd1/Abca12/Ldlrap1/Atp8a2/Prelid1/Sirt1/Abcg1/Pla2g4a/Ptch1/C1qtnf1/Mapk9/Acacb/Fitm1/Tmem30a/Nr1h3/Tmem135/Triap1/Commd1/Fitm2/Plin5	43
GO:0019058	viral life cycle	0.0146134	0.288	2.587e-06	1.04742e-05	Cd74/Plscr2/Slc3a2/Apobec3/Nrp1/Fam111a/Inpp5k/Adarb1/Mx2/Kpna2/Vps16/Vamp8/Vps37b/Rab7/Furin/Cav1/Ifitm1/Tmem41b/Apoe/Lrrc15/Tbc1d20/Uvrag/Lgals1/Jpt2/Smarcb1/Insr/Cav2/Hs3st5/Ddx56/Plscr1/Bcl2/Chmp6/Itgav/Resf1/Stom/Oas1b/Adar/Atg5/Ppid/Chmp4b/Morc2a/Srpk1/Prkn/P4hb/Usp6nl/Tpcn1/Ctsb/Chmp2a/Nectin2/Ly6e/Csnk2b/Trim25/Ace2/Nectin3/Lrsam1/Pkn2/AU040320/Tasor/Chmp1b/Hacd3/Kpna6/Gas6/Ifitm2/Mre11a/…	72
GO:0001764	neuron migration	0.0125837	0.300971	2.60384e-06	1.05287e-05	Col3a1/Tuba1a/Fbxo31/Gata2/Matn2/Nrp1/Adam17/Nrp2/Gja1/Cxcl12/Adgrg1/Mdga1/Ddit4/Fktn/Dclk1/Ndn/Apbb2/Wdr62/Sdccag8/Septin4/Sema6a/Plxna1/Ntn1/Reln/Abi2/Mrtfb/Pcnt/Flrt2/Flna/Mef2c/Ulk1/Large1/Ptk2/Crkl/Myh10/Tubgcp2/Usp9x/Nsmf/Fkrp/Fyn/Sh3rf1/Auts2/Mrtfa/Pex7/Camk2a/AU040320/Mapk8/Celsr1/Bbs1/Arhgap32/Gas6/Shtn1/Katna1/Rhoa/Sema3a/Pomgnt2/Mapt/Mark1/Nr2f1/Camk2b/Tbx20/Dab2ip	62
GO:0034394	protein localization to cell surface	0.00588593	0.402778	2.65251e-06	1.06977e-05	Gpm6b/Jam3/Gpihbp1/Slc28a2/Washc1/Gopc/Synj2bp/Picalm/Wnt11/Abca7/Agap2/Ank2/Gpd1l/Ap3b1/Plk2/Abca12/Akt1/Tm9sf4/Flna/Tyrobp/Ptpru/Gbf1/Angpt1/Mesd/Rab11fip5/Actn2/Tmem35a/Vcl/Commd1	29
GO:0086003	cardiac muscle cell contraction	0.00588593	0.402778	2.65251e-06	1.06977e-05	Adrb1/Snta1/Scn4b/Pde4b/Cacnb2/Bin1/Gja5/Dsc2/Cav1/Kcnh2/Sgcd/Ank2/Gpd1l/Camk2d/Abcc9/Hcn4/Akap6/Uty/Casq2/Flna/Kcnj2/Strit1/Atp1a1/Cav3/Rnf207/Ctnna3/Kcnj8/Stc1/Pkp2	29
GO:1902075	cellular response to salt	0.0123808	0.30198	2.7672e-06	1.11458e-05	Mt1/Tuba1a/Syt12/Ly6c1/Wnk1/Akr1c14/Adcy7/Lgmn/Egr1/Itpkb/Fas/Ppif/Kcnb1/Plcg2/Sipa1/Ehmt2/Nfatc2/Sorbs1/Mecp2/Dlg4/Rgs10/Fabp4/Daxx/Lmnb1/Mef2c/Large1/Crkl/Prkn/Prkaa2/Nek7/Ly6e/Slc12a2/Fyn/Asph/Cpne2/Itpkc/Amigo1/Nfatc4/Dmtn/Clic4/Ly6a/Sorbs2/Slc25a24/Ache/Itpr1/Hsp90b1/Jun/Rock2/Prkaa1/Iqgap1/Smpd1/Hnrnpa1/Cpne3/Slc25a23/Syt3/Syt11/Syt7/Pkd2/Stim1/Tgm2/Stk39	61
GO:0051224	negative regulation of protein transport	0.0099452	0.324503	2.79719e-06	1.1252e-05	Apod/Pim3/Ptpn11/Lrrk2/Fbn1/Inpp5k/Midn/Pkia/Ppm1f/Pfkl/Tbc1d1/Os9/Cd200/Kcnj11/Bag3/Kcnb1/Cyp51/Apoe/Cabp1/Csk/Ogt/Ube2g2/Rest/Sfrp1/Svip/Pde3b/Rhbdf1/Idh2/Angpt1/Prkn/Sirt4/Ndfip2/Pde8b/Wwp2/Rab11fip5/Dmtn/Ubac2/Rab23/Srebf1/Hmgcr/Nr1h3/Erlec1/Rhbdf2/Klf7/Mdfic/Jagn1/Ube2j1/Ndufaf2/Nf1	49
GO:0000266	mitochondrial fission	0.00466816	0.45098	2.86974e-06	1.14844e-05	Bnip3/Mtfp1/Kdr/Stat2/Irgm1/Cox10/Mtfr1/Inf2/Ap3b1/Mcu/Dhodh/Ggnbp1/Prkn/Fis1/Ppargc1a/Pink1/Dnm1l/Rala/Mul1/Tmem135/Dcn/Mapt/Cyrib	23
GO:0048010	vascular endothelial growth factor receptor signaling pathway	0.00466816	0.45098	2.86974e-06	1.14844e-05	Emilin1/Kdr/Nrp1/Flt1/Bmp4/Tmem204/Grb10/Sulf1/Myof/Vegfc/Fgf18/Ptk2b/Dll1/Tek/Fgf9/Angpt1/Pdcd6/Xbp1/Mapk14/Fzd4/Hhex/Mmrn2/Dab2ip	23
GO:0097300	programmed necrotic cell death	0.00466816	0.45098	2.86974e-06	1.14844e-05	Ybx3/Fas/Casp8/Ppif/Cav1/Cflar/Trp53/Mlkl/Casp6/Parp1/Rnf31/Bok/Tlr3/Slc25a4/Itpk1/Ripk3/Asah1/Dnm1l/Mapk8/Adprs/Traf2/Trpm7/Peli1	23
GO:1902743	regulation of lamellipodium organization	0.00466816	0.45098	2.86974e-06	1.14844e-05	Fscn1/Pik3r1/Twf2/Plxnb3/Carmil1/Aqp1/Cfl1/Abi2/Plce1/Wasf2/Nckap1/Enpp2/Cdc42/Slit2/Bin3/Capzb/Coro1c/Cyfip1/Auts2/Dmtn/Pdpn/Actr2/Actr3	23
GO:0090398	cellular senescence	0.00690075	0.373626	2.89114e-06	1.15552e-05	Cdkn1a/Bcl6/Prelp/Bmal1/Vash1/Nampt/Bmpr1a/Pla2r1/Cav1/Trp53/Calr/Eef1e1/Pnpt1/Prkcd/Ypel3/Dnaja3/Lmna/Suv39h1/Plk2/Zmpste24/Map2k1/Mnt/Cdk6/Opa1/Sirt1/Rsl1d1/Akt3/Mapk14/Wrn/Terf2/Tbx2/Kras/Brca2/Hmga1	34
GO:0021915	neural tube development	0.0121778	0.30303	2.93787e-06	1.17243e-05	Sema3c/Ift122/Gas1/Marcks/Wnt5a/Dchs1/Mthfr/Cc2d2a/Sox17/Aldh1a2/Bmp4/Rpgrip1l/Inka1/Intu/Casp8/Cited2/Tbc1d32/Vasp/Casp3/Cfl1/C2cd3/Smo/Sfrp1/Tsc1/Fzd2/Rgma/Tgfb1/Med12/Glmn/Nckap1/Traf6/Zeb2/Ttbk2/Stk3/Tgfb2/Opa1/Itpk1/Dact1/Ptch1/Brd2/Rnf220/Lias/Adm/Ift57/Rab23/Ift140/Brpf1/Rala/Celsr1/Rock2/Cdk20/Arl13b/Prkaca/Kif3a/Gpr161/Rara/Dzip1l/Nf1/Tcf7l2/Fkbp8	60
GO:0150063	visual system development	0.0225289	0.257541	2.94101e-06	1.17243e-05	Sdk2/Cyp1b1/Tspan12/Col5a1/Pxdn/Col8a1/Rcn1/Col5a2/Ninj1/Vim/Kdr/Ift122/Twsg1/Ppp1r13l/Nrp1/Gas1/Gja1/Flt1/Col4a1/Cc2d2a/Aldh1a2/Bmp4/Arhgef15/Bmp6/Rpgrip1l/Bdnf/Ppp2r3a/Prom1/Hipk1/Fgfr3/Ephb1/Spred2/Cacna1s/Frem2/Cited2/Atf4/Fgf2/Cdon/Mertk/Tbc1d32/Dll4/Six5/Cfh/Tbc1d20/Thy1/Tgfbr2/Hdac2/Pds5b/Aqp1/Casp6/Bbs7/Chd7/Pds5a/Fat1/Abi2/Hmgn1/Pcnt/Thrb/Bcl2/Tcirg1/Tenm3/Mfap5/Tgfb1/Zeb1/Dll1/Slc4a7/Sk…	111
GO:0008631	intrinsic apoptotic signaling pathway in response to oxidative stress	0.00507408	0.431034	2.97789e-06	1.1841e-05	Cyp1b1/Prodh/Atf4/Sod1/Mcl1/Fbxo7/Zfp622/Parp1/Fbxw7/Bcl2/Daxx/Aldh2/Uaca/Prkn/Sirt1/P4hb/Fyn/Bag5/Pink1/Arl6ip5/Gskip/Rnf7/Mapt/Sod2/Gpx1	25
GO:0061900	glial cell activation	0.00507408	0.431034	2.97789e-06	1.1841e-05	Ifngr2/Clu/Ctsc/Sphk1/Lrrk2/Adora2a/Nampt/Csf1r/Nr1d1/Smo/Atm/Tlr3/Tyrobp/Zeb2/Hspa4/Agt/Cx3cl1/Kcnj8/Naglu/Il33/Ldlr/Tlr2/Jun/Egfr/Syt11	25
GO:1900746	regulation of vascular endothelial growth factor signaling pathway	0.00284149	0.608696	3.00458e-06	1.19319e-05	Xdh/Smoc2/Emilin1/Cd63/Sema6a/Ptp4a3/Adamts3/Tcf4/Dll1/Ccbe1/Myo1c/Adgra2/Dcn/Dab2ip	14
GO:0015711	organic anion transport	0.0227319	0.256881	3.02763e-06	1.20081e-05	Slc3a2/Car4/Mgst1/Slc10a6/Pla2g12a/Fabp5/Nos2/Ces1d/Gja1/Xk/Rgs4/Slc36a2/Nr3c1/Slco5a1/Slc22a3/Abcg2/Slc37a2/Adora2a/Slc16a7/Lrrc8a/Slco3a1/Acsl5/Bdnf/Slc25a13/Slc7a6/Pla2r1/Slc17a9/Slc16a10/Pla2g5/Slc25a15/Slco2a1/Grm1/Apoe/Slc2a8/Ace/Map2k6/Slc25a19/Rbp7/Apba1/Sfxn2/Myc/Stard10/Lrrc8c/Thbs1/Prkcd/Irs2/Abcb1a/Slc6a8/Eprs1/Slc35b4/Llgl2/Sfxn4/Abcb4/Abcc5/Slc16a13/Slc35a3/Dtnbp1/Sv2a/Fabp4/Epm2a/S…	112
GO:0021782	glial cell development	0.00933631	0.330935	3.05952e-06	1.21191e-05	Tspan2/Clu/Vim/Gpm6b/Sh3tc2/Pmp22/Adora2a/Adam22/Fgfr3/Sod1/Tppp/Nrros/Csf1r/Nr1d1/Eif2b3/Smo/Ndrg1/Tgfb1/Med12/Dll1/Eif2b5/Mios/Akt1/Map2k1/Zeb2/Plp1/B4galt6/Ror1/Sirt2/Agt/Grb2/Erbb2/Naglu/Eif2b2/Ldlr/Tlr2/Mxra8/Eif2b1/Kras/Dmd/Sos1/Egfr/Erbb3/Nf1/Tcf7l2/Eif2b4	46
GO:0071364	cellular response to epidermal growth factor stimulus	0.0038563	0.5	3.12011e-06	1.23277e-05	Dusp3/Ptpn11/Dab2/Inpp5k/Zpr1/Zfp36/Cfl1/Dusp22/Akt1/Snai2/Git1/Erbb2/Zfp36l2/Rasa1/Iqgap1/Egfr/Med1/Plcg1/Dab2ip	19
GO:1905476	negative regulation of protein localization to membrane	0.0038563	0.5	3.12011e-06	1.23277e-05	Bcl2l1/Wnk1/Ppfia1/Dab2/Inpp5k/Tmbim1/Picalm/Lrrc15/Csk/Ogt/Numb/Tgfb1/Rhoq/Cltc/Dmtn/Lztfl1/Pid1/Ppp2r5a/Wnk4	19
GO:0050764	regulation of phagocytosis	0.00872742	0.338583	3.24658e-06	1.28111e-05	Plscr2/Gata2/Rab27a/Ahsg/Sphk1/Ptprc/Myh9/Dysf/Sirpa/Pla2g5/Appl1/Sod1/Plcg2/Mertk/Pros1/Calr/Csk/Abca7/Lman2/Colec11/Plscr1/Lbp/Fer1l5/Tgfb1/Il15/Itgav/Rab31/Atg5/Ptk2/Appl2/Cnn2/Rapgef1/Cfp/Tlr2/Cd47/Camk1d/Gas6/Nckap1l/Lyar/Syt11/Syt7/Prkcg/Tgm2	43
GO:0090288	negative regulation of cellular response to growth factor stimulus	0.0077126	0.35514	3.26434e-06	1.28648e-05	Ptprf/Xdh/Apln/Emilin1/Twsg1/Hjv/Fbn1/Wnt5a/Htra1/Spry4/Sulf1/Smurf2/Gpr155/Cav1/Cflar/Tob1/Sema6a/Thbs1/Sfrp1/Creb3l1/Skil/Slit2/Bmper/Smad7/Bambi/Pdcd6/Agt/Fstl3/Ofd1/Hhex/Sulf2/Adgra2/Dcn/Htra3/Nbl1/Tcf7l2/Mmrn2/Dab2ip	38
GO:0038127	ERBB signaling pathway	0.00852446	0.341463	3.28444e-06	1.29248e-05	Ptprf/Itga1/Lgmn/Dusp3/Errfi1/Ptpn11/Sh3tc2/Socs5/Rab7/Efemp1/Cblb/Rnf126/Rhbdf1/Tgfb1/Chmp6/Ptk2b/Plce1/Nppa/Akt1/Snx5/Map2k1/Ptk2/Kif16b/Hip1r/Agt/Grb2/Erbb2/Arf4/Hip1/Rala/Rhbdf2/Iqgap1/Cnot9/Sos1/Ralb/Egfr/Cpne3/Erbb3/Ccdc88a/Plcg1/Dab2ip/Cbl	42
GO:0002833	positive regulation of response to biotic stimulus	0.0217171	0.25908	3.28785e-06	1.29248e-05	Ifi203/Cd74/Pik3r1/Irf7/Plscr2/Emilin1/Mndal/Ninj1/Ddx60/Gbp2/Wnt5a/Tspan6/Bmp6/Hspd1/Ifi207/Colec12/Tnip2/Irgm1/Nfkbia/Prkca/Riok3/Irak3/Pla2g5/Cav1/Emilin2/Appl1/Lacc1/Ptprs/Plcg2/Znrf1/Nop53/Ifi35/Gps2/Nr1d1/Mapkapk3/Unc93b1/Ifi205/Casp6/Lyn/Nploc4/Trim3/Chuk/Plscr1/Lbp/Alpk1/Ap3b1/Rftn1/Tlr3/Slc15a3/Arrb2/Traf6/Atat1/Traf3/Tyrobp/Polr3d/Otulin/Oas1b/Cd274/Tril/Sirt2/Ipo5/Polr3b/Appl2/Nek7/Sti…	107
GO:0009451	RNA modification	0.0101482	0.320513	3.3207e-06	1.30374e-05	Apobec3/Trmt1l/Mettl16/Adarb1/Hsd17b10/Ankrd16/Wdr6/Mto1/Tfb1m/Pcif1/Larp7/Trmt1/Trmt12/Nsun4/Tyw3/Nsun2/Akt1/Hnrnpc/Ctu2/Cdk5rap1/Cdkal1/Adar/Dkc1/Dus4l/Mettl3/Nat10/Dimt1/Tsr3/Dus1l/Alkbh3/Aars1/Qtrt1/Emg1/Mrm1/Mettl4/Thada/Mrm2/Trmt6/Thumpd2/Mettl14/Sars1/Nhp2/Dus3l/Mettl15/Osgep/Zcchc4/Thumpd1/Trmu/Yrdc/Tgs1	50
GO:0061351	neural precursor cell proliferation	0.0133956	0.293333	3.3571e-06	1.31637e-05	Nes/Gata2/Vcan/Lrrk2/Adgrg1/Wnt5a/Afdn/Foxo3/Bdnf/Fgfr3/Ephb1/Eml1/Fgf2/Cdon/Rsu1/Dll4/Wdr62/Dixdc1/Trp53/Optn/Vegfc/Ptbp2/Lyn/Ift20/Smo/Numb/Tacc1/Pcnt/Rere/Tgfb1/Rora/Mios/Flna/Zeb2/Rarb/Setd1a/Dbn1/Lims1/Lims2/Slc16a2/Ctnna1/Sirt2/Appl2/Dock7/Rapgef1/Cx3cl1/Atf5/Hook3/Igf1/Tead3/Smarca1/Cd24a/Cdh2/Dagla/Mapk8/Kctd11/Bbs1/Itgb1/Hhex/Psmg1/Kif3a/Rhoa/Prdm4/Nf1/Tacc2/Gak	66
GO:0150117	positive regulation of cell-substrate junction organization	0.00365334	0.514286	3.37243e-06	1.32071e-05	Pik3r1/Kdr/Nrp1/Dusp3/Ptpn11/Myh9/Ppm1f/S100a10/Col16a1/Thy1/Cfl1/Tsc1/Tek/Enpp2/Lims1/Smad3/Iqgap1/Epb41l5	18
GO:0006353	DNA-templated transcription termination	0.00304445	0.576923	3.39678e-06	1.32858e-05	Wnk1/Wdr82/Ttf2/Zmpste24/Polr2a/Per2/Zc3h4/Lipe/Cavin1/Polr3k/Setx/Mterf2/Dhx9/Scaf8/Ttf1	15
GO:0099003	vesicle-mediated transport in synapse	0.0154252	0.281481	3.54741e-06	1.38575e-05	Doc2b/Bcl2l1/Syn2/Syt12/Actb/Ston2/Actg1/Lrrk2/Pls3/Bin1/Erc1/Pfn2/Prkca/Sacm1l/Pcdh17/Ap1s2/Picalm/Atp6v1a/P2ry1/Clcn3/Efnb2/Rapgef4/Grik5/Dnm3/Lpar1/Dtnbp1/Numb/Ston1/Sv2a/Arfgap3/Atp6v1g1/Slc4a8/Cplx2/Rab3a/Tprg1l/Gsg1l/Snx9/Fbxl20/Sirt2/Itsn1/Prkn/Ncs1/Slc17a7/Dennd1a/Grip2/Snap91/Git1/Cltc/Stxbp1/Dnm1/Cyfip1/Unc13a/Camk2a/Hip1/Cd24a/Dnm1l/Snap47/Cdh2/Rala/Rnf216/Ppp3cb/Snap29/Snap23/Atp6v1d/…	76
GO:0006887	exocytosis	0.0209052	0.260759	3.65463e-06	1.42585e-05	Doc2b/Bcl2l1/Syn2/Syt12/Gata2/Rab27a/Ptgds/Il4ra/Tnfaip2/Clasp1/Hmox1/Lrrk2/Vps11/Anxa2/Steap3/Myh9/Pi4k2a/Coro1a/S100a10/Erc1/Vamp8/Pfn2/Prkca/Ccr2/Rab7/Sacm1l/Washc1/Kcnb1/Rab21/Exoc3l/Septin4/Mical3/P2ry1/Lat2/Rapgef4/Grik5/Lyn/Llgl2/Rab3il1/Exoc4/Rest/Clasp2/Dtnbp1/Scamp1/Mical1/Sv2a/Nppa/Abca12/Slc4a8/Rph3al/Arfgef2/C9orf72/Sphk2/Cplx2/Rab31/Ywhaz/Rab3a/Tprg1l/Rab3d/Tspan18/Tmem167/Fbxl20/It…	103
GO:0046323	glucose import	0.00669779	0.375	3.66408e-06	1.42774e-05	Pea15a/Klf15/Ptpn11/Aspscr1/Grb10/Prkca/Adipor2/C1qtnf2/Appl1/Osbpl8/Ace/Sorbs1/Myc/Prkcd/Irs2/Insr/Tsc1/Akt1/C2cd5/Appl2/Rhoq/Igf1/Sgcb/Slc2a1/Rasa1/Mapk14/Slc27a1/Capn10/Rnasel/Pid1/Erbb3/Slc27a4/Crebl2	33
GO:1902893	regulation of miRNA transcription	0.00588593	0.39726	3.68674e-06	1.43477e-05	Apln/Gata2/Ets1/Atoh8/Egr1/Nr3c1/Foxo3/Bmp4/Bmpr1a/Gata6/Trp53/Myc/Hdac2/Rest/Mrtfb/Gnl3/Tgfb1/Tgfb2/Bmyc/Mrtfa/Nfatc4/Srebf1/Smad3/Tead1/Jun/Egfr/Rara/Smad1/Ar	29
GO:0001649	osteoblast differentiation	0.0135985	0.291304	3.69356e-06	1.43486e-05	Lox/Col1a1/Pth1r/Igfbp3/Tent5a/Ddr2/Twsg1/Limd1/Gja1/Cebpd/Bmp4/Zfp932/Igfbp5/Ipo7/Bmp6/Bmpr1a/Ift80/Atf4/Tmem64/Fgf2/Ifitm1/Trp53inp2/Vegfc/Tob1/Map2k6/Fosl2/Wnt11/Clic1/Cd276/Smo/Lmna/Rest/Sfrp1/Tcirg1/Creb3l1/Akt1/Cbfb/Yap1/Fgf9/Cdk6/Mapk11/Mef2c/Adar/Atraid/Snai2/Bambi/Ptk2/Fhl2/Sirt7/Igf1/Ptch1/Acvr2a/Noct/Zhx3/Mapk14/Smad3/Gdf10/Rassf2/Smoc1/Acvr1/Fam20c/Gnas/Prkaca/Hdac8/Smad1/Nf1/Tgfbr3	67
GO:0051053	negative regulation of DNA metabolic process	0.00953927	0.326389	3.69621e-06	1.43486e-05	Cdkn1a/H1f2/Polq/Bcl6/Ankrd1/Tspyl2/Gja1/Dffa/Kcnk2/Dusp1/Flcn/Shld1/Dach1/Ercc1/Trp53/Dcp2/Pds5a/Rnf169/Gmnn/Parp1/Atm/Xrcc1/Mcrs1/Ten1/Timeless/Hnrnpc/Inppl1/Lig3/Nat10/Smchd1/Tnks2/Gtpbp4/Mad2l2/Trp53bp1/Kmt5a/Rif1/Stn1/Terf2ip/Tnks/Rad18/Nmnat1/Gnl3l/Terf2/Msh3/Pot1a/Ttf1/Fbh1	47
GO:0051881	regulation of mitochondrial membrane potential	0.00690075	0.369565	3.83881e-06	1.48651e-05	Bcl2l1/Nnt/Bnip3/Kdr/Lrrk2/Tspan4/Adora2a/Dynll1/Ubb/Mllt11/Sod1/Tspan9/Gclm/Myc/Clic1/Got1/Parp1/Bok/Bcl2/Akt1/Bak1/Mtln/Prelid1/Prkn/Gclc/Pink1/Arl6ip5/Mul1/Pid1/Ndufs4/Tmem135/Dcn/Mapt/Sod2	34
GO:0072524	pyridine-containing compound metabolic process	0.00690075	0.369565	3.83881e-06	1.48651e-05	Fmo2/Nnt/Aldh1l1/Alpl/Aldob/Hsd11b1/Rpia/Gpd1/Nudt12/Aldh1l2/Nqo1/Nampt/Dcxr/Cyb5r4/Prps2/Tigar/Trp53/Nmrk2/Gpd1l/Rpe/Me1/Mlst8/Idh2/Fmo1/Dlst/Gpd2/Taldo1/Ncf2/Noct/Nmnat1/Pdxk/Idh3g/Pcx/Pnpo	34
GO:0032479	regulation of type I interferon production	0.00913335	0.330882	3.91404e-06	1.51188e-05	Irf7/Ptpn11/Pola1/Hspd1/Xaf1/Irgm1/Riok3/Sirpa/Ptprs/Plcg2/Dhx36/Nploc4/Garin5a/Ddx56/Chuk/G3bp1/Tlr3/Trim65/Traf6/Traf3/Zbtb20/Tyrobp/Polr3d/Oas1b/Atg5/Stat1/Polr3b/Sting1/Crebbp/Irf1/Gpatch3/Relb/Tlr2/Rnf125/Rnf216/Tirap/Gbp7/Irak1/Klhl22/Arrdc4/Dhx9/Irf5/Tbk1/Ufd1/Gapdh	45
GO:0046467	membrane lipid biosynthetic process	0.00913335	0.330882	3.91404e-06	1.51188e-05	Abca8b/St8sia4/Tlcd3b/Gal3st3/Pigg/Hacd1/Abca8a/Sphk1/Hacd4/Agk/Pgap1/Acer2/Degs1/Pigq/Kdsr/Dpm1/Prkcd/Pigs/St6galnac4/Pgap2/Sptlc2/Pyurf/Asah2/Pigu/B4galt6/Sphk2/Pigk/St8sia6/St3gal2/Pigw/Pgap3/Pigc/Pigo/Samd8/Cers2/Asah1/Hacd3/Smpd2/Osbp/Smpd1/A4galt/Pigv/Sccpdh/Ormdl1/Cers4	45
GO:0099159	regulation of modification of postsynaptic structure	0.00243556	0.666667	3.99654e-06	1.54183e-05	Baiap2/Kalrn/Marcks/Cdc42/Ptk2/Itsn1/Myh10/Cyfip1/Rhob/Rhoa/Myo5b/Nf1	12
GO:0034219	carbohydrate transmembrane transport	0.00893038	0.333333	4.00771e-06	1.54231e-05	Pea15a/Klf15/Fabp5/Stxbp4/Ptpn11/Inpp5k/Aqp7/Aspscr1/Grb10/Prkca/Adipor2/C1qtnf2/Appl1/Osbpl8/Slc2a8/Ace/Sorbs1/Myc/Aqp1/Slc2a12/Prkcd/Irs2/Insr/Tsc1/Slc45a3/Aoc3/Akt1/Slc26a6/C2cd5/Appl2/Rhoq/Igf1/Sgcb/Slc2a1/Rasa1/Mapk14/Slc27a1/Capn10/Rnasel/Pid1/Erbb3/Slc27a4/Crebl2/Tmem144	44
GO:0045739	positive regulation of DNA repair	0.00893038	0.333333	4.00771e-06	1.54231e-05	Actb/Actr8/Morf4l1/Ube2n/Shld1/Tigar/Ino80c/Nfrkb/Mms19/Uchl5/Smarcb1/Bcl7c/Parp1/Xrcc1/Bcl7b/Mcrs1/Hdgfl2/Timeless/Ruvbl2/Epc2/Smchd1/Cebpg/Sirt1/Mad2l2/Ube2v2/Pbrm1/Brcc3/Actr5/Pias4/Eya2/Rif1/Slf1/Actr2/Dmap1/Brd7/Babam2/Dhx9/Arid1b/Tfpt/Egfr/Uimc1/Mrgbp/Wdr48/Prkcg	44
GO:0035601	protein deacylation	0.0060889	0.38961	4.04436e-06	1.55066e-05	Hdac9/Dysf/Fry/Ndn/Spred2/Tppp/Yeats2/Hdac2/Tada3/Suv39h1/Tgfb1/Smarca5/Spred1/Flna/Dyrk1a/Sirt2/Sirt1/Kat14/Sirt4/Prkaa2/Abhd13/Ripk3/Sirt7/Prkaa1/Lypla2/Brms1/Hdac8/Mapt/Mbip/Hdac1	30
GO:0042982	amyloid precursor protein metabolic process	0.0060889	0.38961	4.04436e-06	1.55066e-05	Clu/Adam17/Itm2a/Bin1/Epha4/Csnk1e/Adam10/Picalm/Apoe/Casp3/Tmcc2/Abca7/Rtn3/Itm2b/Lyn/Bace2/Ranbp9/Ldlrap1/Dyrk1a/Adam19/Abcg1/Efna1/Igf1/Naglu/Unc13a/Prnp/Rock2/Aatf/Adam9/Psenen	30
GO:0098732	macromolecule deacylation	0.0060889	0.38961	4.04436e-06	1.55066e-05	Hdac9/Dysf/Fry/Ndn/Spred2/Tppp/Yeats2/Hdac2/Tada3/Suv39h1/Tgfb1/Smarca5/Spred1/Flna/Dyrk1a/Sirt2/Sirt1/Kat14/Sirt4/Prkaa2/Abhd13/Ripk3/Sirt7/Prkaa1/Lypla2/Brms1/Hdac8/Mapt/Mbip/Hdac1	30
GO:1902105	regulation of leukocyte differentiation	0.0194845	0.264463	4.06415e-06	1.55633e-05	H2-Aa/Rorc/Cd74/Pik3r1/Gata2/Actb/Ninj1/Bcl6/Il4ra/Itpkb/Ptprc/Zbtb16/Fbn1/Sart1/Bmp4/Cyp26b1/Fas/Fgfr3/Zbtb46/Socs5/Casp8/Prkca/Ccr2/Tmem64/Adrm1/Creb1/Csf1r/Tgfbr2/Mmp14/Myc/Fbxo7/Clptm1/Csf1/Lyn/Smarcb1/Sfrp1/Fbxw7/Tgfb1/Dusp10/Trib1/Il15/Ap3b1/Zeb1/Ctla2a/Traf6/Cbfb/Tyrobp/Prdm16/Cdk6/Zc3h8/Smad7/Zfp608/Klf10/Mettl3/Hlx/Prelid1/Xrcc6/Zbtb7b/Ptpn6/Irf1/Sh3rf1/Cd28/Erbb2/Bmyc/Vsir/Tfe3/Zfp36l2/…	96
GO:0010662	regulation of striated muscle cell apoptotic process	0.00548001	0.409091	4.08725e-06	1.55812e-05	Igfbp3/Bnip3/Fndc1/Zfas1/Gata6/Bag3/Cflar/Capn1/Tigar/Trp53/Fbxo32/Camk2d/Bcl2/Slc25a4/Trip10/Rapgef3/Ppp1r10/Atg5/Sirt1/Sirt4/Acot1/Naca/Agt/Camk2a/Pdpk1/Hmgcr/Mapk8	27
GO:0060038	cardiac muscle cell proliferation	0.00548001	0.409091	4.08725e-06	1.55812e-05	Ccnd2/Gja1/Dipk2a/Cxadr/Bmpr1a/Kcnk2/Gata6/Cited2/Tbx5/Fgf2/Jarid2/Tgfbr2/Hdac2/Yap1/Fgf9/Mapk11/Mef2c/Tgfb2/Vgll4/Myh10/Mapk14/Pim1/Tbx2/Zfpm2/Smad1/Tgfbr3/Tbx20	27
GO:0071774	response to fibroblast growth factor	0.00730668	0.36	4.08887e-06	1.55812e-05	Fgf16/Ccn2/Apln/Smoc2/Ptpn11/Wnt5a/Spry4/Sulf1/Fgfr3/Ext1/Fgf2/Dll4/Zfp36/Thbs1/Sfrp1/Fgf18/Creb3l1/Flrt2/Fgf9/Crkl/Kif16b/Grb2/Zfp36l2/Setx/Cep57/Elk1/Nptn/Ofd1/Tbx2/Fam20c/Iqgap1/Sulf2/Sos1/Ext2/Tcf7l2/Fat4	36
GO:0090630	activation of GTPase activity	0.00730668	0.36	4.08887e-06	1.55812e-05	Arhgap29/Wnt5a/Arhgef15/Tbc1d1/Tbc1d17/Tbc1d5/Tbc1d10c/Sipa1/Tbc1d4/Agap2/Tsc1/Ptk2b/Apc2/Tbc1d8b/Tbc1d15/Tiam2/Agap3/Tbck/Crkl/Dock7/Rapgef1/Usp6nl/Sgsm2/Iqsec3/Tbc1d2b/Evi5/Rap1gap2/Coro1c/Arhgef19/Nedd9/Rasa1/Ntf3/Ralgapb/Evi5l/Sipa1l3/Slc27a4	36
GO:0071248	cellular response to metal ion	0.0115689	0.304813	4.19715e-06	1.59742e-05	Mt1/Tuba1a/Tfrc/Syt12/Bnip3/Wnk1/Akr1c14/Adcy7/Lgmn/Itpkb/Hmox1/Fn1/Lrrk2/Fas/Bmp6/Ppif/Slc40a1/Kcnb1/Plcg2/Tigar/Creb1/Nfatc2/Aqp1/Mecp2/Chuk/Dlg4/Fabp4/Akt1/Daxx/Mef2c/Prkaa2/Nek7/Slc12a2/Asph/Cpne2/Itpkc/Mapk9/Nfatc4/Dmtn/Clic4/Mapk8/Slc25a24/Prnp/Jun/Prkaa1/Iqgap1/Smpd1/Nfe2l1/Egfr/Hnrnpa1/Cpne3/Slc25a23/Syt3/Syt11/Syt7/Pkd2/Stk39	57
GO:0001704	formation of primary germ layer	0.0077126	0.351852	4.21383e-06	1.59985e-05	Col5a1/Col5a2/Scx/Twsg1/Atoh8/Fn1/Wnt5a/Myh9/Sox17/Bmp4/Bmpr1a/Dusp1/Gata6/Wnt11/Exoc4/Sox7/Leo1/Wls/Itgav/Itga5/Ets2/Map2k1/Vtn/Kif16b/Rtf1/Tnrc6c/Macf1/Grb2/Ctr9/Dusp4/Smad3/Gpi1/Paf1/Acvr1/Prkaca/Epb41l5/Ext2/Smad1	38
GO:0005976	polysaccharide metabolic process	0.0077126	0.351852	4.21383e-06	1.59985e-05	Gnmt/Pcdh12/Adrb1/Gabarapl1/Inpp5k/Gfpt1/Grb10/Phkg1/Phka1/Ext1/C1qtnf2/Khk/Nr1d1/Sorbs1/Irs2/Phkb/Insr/Tgfb1/Ndst2/Epm2a/Esrrb/Akt1/Ppp1r2/Ppp1r3d/Stk40/Ppp1r3b/Per2/Phka2/Gys1/Cltc/Igf1/Phkg2/Pgm2/Ppp1ca/Agl/Ext2/Lepr/Tcf7l2	38
GO:0007416	synapse assembly	0.0131926	0.292793	4.24301e-06	1.60519e-05	Sdk2/Pik3r1/Thbs2/Eef2k/Cux2/Plxnd1/Wnt5a/Arhgef15/Mdga1/Bdnf/Ephb1/Lrrc4b/Prkca/Pcdh17/Plxnb1/Ptprs/Rap2a/Nrxn2/Efnb2/Adgrl2/Ogt/Srpx2/Arhgef9/Ntn1/Reln/Dnm3/Mecp2/Numb/Ppp1r9a/Dlg4/Ptk2b/Flrt2/Slit2/Epha7/Mef2c/Large1/Ptk2/Abi3bp/Crkl/Dock7/Lrfn4/Adgre5/Ube2v2/Ptprd/Kcnj8/Gpc4/Amigo1/Tlr2/Colq/Lrp4/Cdh2/Nptn/Ache/Myo6/Sema4a/Bhlhb9/Rhoa/Mapt/Actr3/Psd/Adgrl1/Rab29/Cacna1a/Lrtm1/Amigo3	65
GO:0046890	regulation of lipid biosynthetic process	0.0131926	0.292793	4.24301e-06	1.60519e-05	Cd74/Igfbp7/Akr1c14/Adgrf5/Fabp5/Egr1/Sphk1/Ces1d/Dab2/Nr3c1/Bmp6/Acsl5/Erlin2/Stard4/Sod1/Erlin1/Apoe/Creb1/Nr1d1/Sorbs1/Ogt/Prkcd/Sf1/Rest/Slc45a3/Igf1r/Akt1/Dhcr7/Gpam/Zbtb20/Sphk2/Eif6/Mlst8/Dgat2/Snai2/Lpcat1/Atp1a1/Sirt2/Sirt1/Sirt4/Pde8b/Abcg1/Pla2g4a/Agt/Igf1/Samd8/Lpgat1/Ldlr/Mapk9/Ppargc1a/Asah1/Srebf1/Slc27a1/Insig2/Nr1h3/Ddx20/Prmt3/Dgat1/Thrsp/Pcx/Fitm2/Plin5/Ormdl1/Tcf7l2/Crebl2	65
GO:0070588	calcium ion transmembrane transport	0.0190785	0.265537	4.24337e-06	1.60519e-05	Ccn2/Adrb1/Selenon/Tmem38b/Zfas1/Ptprc/Trpv4/Ibtk/Pde4b/Cacnb2/Trpc3/Coro1a/Dysf/Bin1/Gp1ba/Bmp4/Tspan13/Ngf/Cacna1s/Casq1/Cav1/Fgf2/Plcg2/Plcd1/Cabp1/Thy1/Ank2/Chd7/Plcb4/Lyn/Trpv2/Camk2d/Ahnak/Akap6/Bcl2/Tgfb1/Ptk2b/Itgav/Plce1/Casq2/Nppa/Mcu/Akt1/Flna/Plp1/Bak1/Adcyap1r1/Tgfb2/Ednrb/Opa1/Rapgef3/Plcb3/Atg5/Hrc/Strit1/Cav3/Gnb5/Micu1/Itpr3/Tpcn1/Tmco1/Cx3cl1/Ptpn6/Rem1/Kcnj8/Fyn/Asph/Slc35g1/Er…	94
[truncated: 2,250 more rows]

## Sheet: Table S4
Supplemental Table S4: Differential gene expression analysis of RNA-seq from cardiac microvascular endothelial cells cultured with 2.5% plasma from influenza-infected vs vehicle (PBS)-exposed mice. Bold = genes meeting DEG threshold of log2FC >0.5 and padj <0.05.
[truncated: 12,226 more rows]

[truncated: 2 more sheets: Table S5, Table S6]
